# Supplementary material for: Lahar events in the last 2,000 years from Vesuvius eruptions. Part 1: Distribution and impact on densely-inhabited territory estimated from field data analysis
Source: Copernicus journal article supplement (doi:10.5194/egusphere-2023-1302), 2023-08-01
Supplement: Supplementary file [file egusphere-2023-1302-AC2-supplement.pdf]

Dear Editor Andrea Di Muro

Manuscript **Lahar events in the last 2,000 years from Vesuvius eruptions. Part 1: Distribution and impact on densely-inhabited territory estimated from field data analysis**

Many thank for your revision which improved and clarified some points of the the manuscript. In red our answer

It follows the reply to the comments one-by-one:

I'm happy to join the reviewers in stressing the importance of the work your team has performed and the high quality of the dataset you have integrated to build a very exhaustive study of lahar processes in the Vesuvius area. The review process has permitted to effectively integrate the suggestions and remarks of the three reviewers and I consider the paper can be accepted for publication. In order to produce a final version best conveying the important messages of your paper to a broad audience, I would like to suggest you to consider here below some minor modifications and suggestions.

A rapid submission of a final version integrating these suggestions will thus permit the review process of the three companion papers to be finalized basically synchronously.

Many thanks for your consideration. We have followed the suggestions below.

Line 100: "Mobility" would imply long range transport capability, but in the sentence here it is unclear whether you are instead stressing that lahar triggering can occur also in distal areas (xx km from the summit Vesuvius crater); if this is correct, this term should be modified to express you are showing a large trigger area can be affected and not that flows have a large transport distance.

Thanks. We have clarified this point (LINES 98-102).

Line 108: unclear sentence; what does that mean "repeated lahar..episodes...stroke..its human settlements...evidencing attempts of resettlement"?

Thanks. We have clarified this sentence (LINE 110).

Line 640 “Both Acerra and Nola localities”; this is one of the many examples scattered in the whole paper and already pointed by the reviewers, where the sites are quoted but with no reference to a map, or (most important) explicit quotation of distance with respect to the volcano summit or to the location with respect to the primary deposits etc etc are reported; Reference sites are also described in detail in the appendix, but no distance is reported with respect to Vesuvius or other information able to help the reader to quickly locate the sites. This kind of sentences implies the reader has a good knowledge of the study area, but make the reading difficult for researchers knowing little about the Vesuvius area and related eruptions and request a frequent check in maps to locate the quoted sites; in order to improve the readability of the whole text, please integrate these basic information throughout the whole paper, in order to help the reader to immediately locate the quoted areas/cities (“how far from Vesuvius is a given distal area”?) and thus better follow the line of reasoning presented in the text.

Thanks. We have specified the distance between Acerra and Nola from their source areas (Somma-Vesuvius and Apennines, respectively) throughout the text.

Also, we have slightly modified all maps throughout the text in order to show the main toponyms, in particular the recurrent ones that we use for results presentation and discussion.

Fig. 17 Do the velocity values reported in the figure correspond to syn-eruptives or post-eruptive units? Do you find a correlation between deposit thickness and calculated velocity?

Thanks. The velocity and pressure values correspond both to the syn- and post-eruptive lahar units, which we have specified immediately after Fig. 16 and also before Fig. 17. This is specified now also in Fig. A1 caption (LINE 739, LINES 1025-1026).

There is no correlation between deposit thickness and calculated velocity; the correlation is between clast dimension and calculated velocity (Eq. A3).

Line 861 : please delete the brackets enclosing the temperature value.

Thanks. We have done it (LINE 885).

>>Both Pollena and 1631 distribution maps suggest that for a given location, the thickness of post eruptive lahars is larger than that of syn-eruptive; if this is correct, this information could be better stressed, discussed and interpreted, a link with grain size

could be made more explicit, if existing, and ,most important, the implications in terms of trigger processes and hazard included in the paper.

Thanks. We have double checked this point, both in the database and in Figs. 8-11, and actually the thickness of the post-eruptive lahar units is not larger than the one of the syn-eruptive units. An issue might have arisen from Fig. 9, which has the colour bar scale different from the one of Fig. 8; we can improve this in the final editing of the paper.

>>Magnetization study suggest that some units had emplacement temperatures above 100°C; the implication of that in terms of occurrence of vapour phase, sedimentary structures and transport properties should be discussed. Does that imply the fluid phase was multiphase? How is that included in the physical modelling?

Thanks. We have added the following paragraph in the discussion section to link this point on temperature with the modelling presented in the companion paper of de'Michieli Vitturi et al. (this issue):

The companion paper of de'Michieli Vitturi et al. (this issue) 3orcesi s3e salso the nexus between water temperature, flow viscosity, and their consequential impact on fluid dynamics. Specifically, when the dominance of frictional 3orcesi s attributable to the yield slope term, the initial divergence between high- and low-temperature scenarios appears negligible. However, discernible dissimilarity appears over time for the inundation area of the colder flow case (i.e., 27 °C) with respect to the warmer counterpart (i.e., 100 °C), the latter case being close to the 120 °C one reported from paleomagnetism. Remarkably, the temperature-induced variations assume a pivotal role in shaping the dynamic characteristics of the hotter flow. The diminished viscosity associated with elevated temperatures not only amplifies fluid mobility but also prompts a notable acceleration in sediment settling velocity. This, in turn, initiates a debulking mechanism, thereby intensifying overall flow mobility. Consequently, this intricate interplay contributes to a reduced footprint of deposited material from the flow, altering the spatial distribution of sediments. However, the overall impact on the inundation area is typically quite reduced, being typically less than 10-20% even considering a thickness threshold of 1 mm (see de'Michieli Vitturi et al., this issue) (LINES 888-901).

Line 222 In spite of being Sarno one of the most affected municipalities, no reference to 1998 Sarno lahar events in terms of triggering, dynamics, sources, impact areas and deposit facies is offered in this paper. As this is one of the most recent and significant (including in terms of victims) events affecting the studied area, it is surprising the lack of explicit reference and comparison in the paper.

Thanks. We have specified on this point at the end of Section 3.1 (LINES 235-243).

Looking forward receiving the final version of this important research paper.

Many thanks again.

Mauro and co-authors

Mauro Antonio Di Vittorio



1 **Lahar events in the last 2,000 years from Vesuvius eruptions. Part 1: Distribution and impact**  
2 **on densely inhabited territory estimated from field data analysis**

3 Mauro A. Di Vito (1,\*), Ilaria Rucco (2), Sandro de Vita (1), Domenico M. Doronzo (1), Marina Bisson (3), Mattia de'  
4 Michieli Vitturi (3), Mauro Rosi (4), Laura Sandri (5), Giovanni Zanchetta (4), Elena Zanella (6), Antonio Costa (5)

5 (1) Istituto Nazionale di Geofisica e Vulcanologia - Sezione di Napoli Osservatorio Vesuviano, Napoli, Italy

6 (2) Heriot-Watt University, School of Engineering and Physical Sciences, Edinburgh, United Kingdom

7 (3) Istituto Nazionale di Geofisica e Vulcanologia - Sezione di Pisa, Pisa Italy

8 (4) Università di Pisa, Dipartimento di Scienze della Terra, Pisa, Italy

9 (5) Istituto Nazionale di Geofisica e Vulcanologia - Sezione di Bologna, Bologna, Italy

10 (6) Università di Torino, Dipartimento di Scienze della Terra, Torino, Italy

11 \*Corresponding author: Mauro A. Di Vito (mauro.divito@ingv.it)

12

13 **Abstract**

14 Lahars represent some of the most dangerous phenomena in volcanic areas for their destructive  
15 power, causing dramatic changes in the landscape with no premonitory signs and impacting on  
16 population and infrastructures. In this regard, the Campanian Plain turns out to be very prone to the  
17 development of these phenomena, since the slopes of the Somma-Vesuvius and Campi Flegrei  
18 volcanoes, along with the Apennine reliefs are mantled by pyroclastic deposits that can be easily  
19 remobilized, especially after intense and/or prolonged rainfall.

20 This study focuses on the analysis of the pyroclastic fall and flow deposits and of the syn- and post-  
21 eruptive lahar deposits related to two sub-Plinian eruptions of Vesuvius, 472 CE (Pollena) and 1631.

22 To begin with, historical and field data from the existing literature and from hundreds of outcrops  
23 were collected and organized into a database, which was integrated with several new pieces of data.

24 In particular, stratigraphic, sedimentological (facies analysis and laboratory) and archaeological  
25 analyses were carried out, in addition to rock magnetic investigations and impact parameter  
26 calculations. The new data are also referred to the finding of ash beds in more distal areas, which  
27 were included into new isopach maps for the two sub-Plinian eruptions.

28 The results show that for both the eruptions the distribution of the primary deposits is wider than  
29 previously known. A consequence of these results is that a wider areal impact should be expected in  
30 terms of civil protection, as the sub-Plinian scenario is the reference one for a future large eruption  
31 of Vesuvius. Such distribution of the pyroclastic deposits directly affects the one of the lahar deposits,  
32 also because a significant remobilization took place during and after the studied eruptions, which  
33 involved the distal phreatomagmatic ash. From these integrated analyses, it was possible to constrain  
34 the timing of the deposition and the kind of deposits remobilized (pyroclastic fall vs. flow), as well  
35 as was possible to calculate the velocities and dynamic pressures of the lahars, and ultimately infer  
36 the lahar transport and emplacement mechanisms.

37 The multidisciplinary approach adopted in this work shows how it is crucial to assess the impact of  
38 lahars in densely populated areas even at distances of several to tens of km from active volcanoes.  
39 This especially applies to large parts of the densely populated areas around Somma-Vesuvius up to  
40 the nearby Apennine valleys.

41 Keywords: Somma-Vesuvius; Apennine valleys; pyroclastic deposits; lahars; areal distribution; local  
42 impact.

43

## 44 **1. Introduction**

45 The movement of volcanoclastic mass flows, and the consequent damage along the flanks of active  
46 volcanoes and perivolcanic plains, represent a constant threat to inhabited areas and populations (e.g.,  
47 Waitt et al., 1983; Lowe et al., 1986; Pierson, 1985; Newhall and Punongbayan, 1996). Such systems

48 are variably-fluidized, gravity-driven flows that consist of a mixture of pyroclastic sediment and  
49 water. They can be triggered by various mechanisms, among which the most common are intense or  
50 prolonged atmospheric precipitations (Arguden and Rodolfo, 1990; Rodolfo and Arguden, 1991;  
51 Pareschi et al., 2000; Rodolfo, 2000; Scott et al., 2001; Vallance and Iverson, 2015). Such  
52 precipitations or water runoff, especially during and/or after the eruptions, can cause the  
53 remobilization of pyroclastic deposits evolving into water-saturated multiphase systems called lahars  
54 (e.g., White et al., 1997; Sheridan et al., 1999; Scott et al., 2001; Baumann et al., 2020). The last  
55 century was affected by a significant number of highly-impacting lahar events associated to well-  
56 studied explosive volcanic eruptions worldwide, such as for example at Colima (Mexico) in 1913  
57 (Rodriguez-Sedano et al., 2022), Nevado del Ruiz (Colombia) in 1985 (Voight, 1990), Ruapehu (New  
58 Zealand) in 2007 (Lube et al., 2012), and Merapi (Indonesia) in 2011 (Jenkins et al., 2015).

59 According to Rodolfo (2000), Sulpizio et al. (2006), and Vallance and Iverson (2015), volcanoclastic  
60 mass flows can be generated at variably-long time intervals, spanning from eruptive to post-eruptive  
61 phases of tens to hundreds of years. In case these flows are directly related to volcanic eruptions, that  
62 is occurring during or shortly after the eruptive event, lahars are defined as syn-eruptive, and can  
63 represent an important multihazard factor in the short-to-middle term for perivolcanic areas (Rodolfo,  
64 2000; Sulpizio et al., 2006). Instead, in case they are unrelated to any eruption dynamics, that is  
65 occurring during long periods of volcanic quiescence, they are defined as post-eruptive (Vallance and  
66 Iverson, 2015), and can represent a long-term hazard factor (e.g., Siebe et al., 1999; Pareschi et al.,  
67 2002; Zanchetta et al., 2004a, 2004b; Sulpizio et al., 2006). Usually, post-eruptive lahars are not  
68 accounted for the assessment of volcanic hazard, although their study is important for  
69 hydrogeological hazard assessment and long-term territorial planning.

70 In this sense, that is from the hazard assessment point of view, one of the priorities concerns the  
71 assessment of those areas potentially exposed to such a threat, taking into account the temporal  
72 recurrences of the phenomena (over days to months after an eruption, or years to decades after) and  
73 physical features of the volcanoclastic mass flows (volume, thickness, velocity, dynamic pressure,



74 concentration, and invasion areas). We stress the fact that the definition of syn-eruptive lahars  
75 (Sulpizio et al., 2006; Vallance and Iverson, 2015) adopted in the present work is important when  
76 accounting for the multihazard of explosive eruptions, which in areas like Vesuvius and surroundings  
77 should not be neglected for its assessment and mapping purposes (de' Michieli Vitturi et al., this issue;  
78 Sandri et al., this issue). The methodology used in this work is geological (see Section 3.2), and the  
79 syn-eruptive definition of lahars is necessary to avoid underestimations of the volcanic hazard from  
80 sub-Plinian eruptions at Vesuvius.

81 A lot of the existing literature analyzed the hazard related with volcanoclastic mass flows on the flanks  
82 of active volcanoes, through the reconstruction of historical and prehistoric events (e.g., Scott, 1989;  
83 Scott et al., 1995; Vallance and Scott, 1997; Zaragoza et al., 2020), by using empirical relationships  
84 or physical models (e.g., Macedonio and Pareschi, 1992; Costa, 1997; Iverson et al., 2000; Walsh et  
85 al., 2020). However, the areas affected by these phenomena can be extended well beyond the  
86 boundaries of the volcanic complex, also including the surrounding plains and the downwind-lying  
87 mountainous areas, which are subjected to tephra fallout sometimes even at great distances from the  
88 volcano (e.g., Siebe et al., 1999; Pareschi et al., 2000, 2002; Zanchetta et al., 2004a, 2004b; Di  
89 Crescenzo and Santo, 2005). In these areas, volcanoclastic mass flows may cause victims and  
90 damages, even where considered safe or scarcely affected by other volcanic hazards.

91 In this paper, we present the results of a multidisciplinary study, including geomorphological,  
92 stratigraphic, sedimentological and rock magnetic investigations, as well as impact parameter  
93 calculations by reverse engineering from the deposits. These investigations followed several  
94 surveying campaigns carried out in natural exposures, archaeological excavations, and trenches dug  
95 specifically for this purpose in the plain surrounding the Vesuvius edifice and along the Apennine  
96 valleys (Fig. 1). One of the goals of this study is to show the presence of lahar deposits even in areas  
97 several km far from the source areas of the Apennine hills and Somma-Vesuvius edifice,  
98 demonstrating the high mobility of these flows. Indeed, these two areas acted as source areas because  
99 they were largely affected by deposition of primary pyroclastic deposits from Plinian and sub-Plinian

100 Somma-Vesuvius eruptions. The study of the past lahar deposits has been useful for the understanding  
101 of the feeding drainage basins, their extent and facies variations with distance from the source area,  
102 and the associated impact on landscape. As already pointed out by Di Vito et al. (2013, 2019), in the  
103 past 4.5 ka repeated lahar and flooding episodes related to the main eruptions of Somma-Vesuvius  
104 and Campi Flegrei volcanoes strongly stroke the Campanian Plain and its human settlements,  
105 influencing their partial or total abandonment. In particular, for the areas around Vesuvius, these  
106 phenomena included: i) large volume and high energy lahars, originated from the volcanic edifice,  
107 which affected the volcanic apron; ii) large flooding phenomena, i.e. overflowing of water affecting  
108 the Campanian plain; iii) lahars originated from the perivolcanic mountains that affected the  
109 Apennine valleys, and invaded the areas of the plain at their mouths. All of these phenomena differed  
110 to each other in terms of amount and grain-size of the involved sediment. The data and pieces of  
111 information described here were the basis for validating a new model for lahar transport (de' Michieli  
112 Vitturi et al., this issue), which was applied for assessing the related hazard at Vesuvius and  
113 Campanian Plain (Sandri et al., this issue).

114 The structure of the work consists of an integrated geological, geomorphological, stratigraphic and  
115 sedimentological study, a paleomagnetic and sediment-mechanic impact assessment calculation, and  
116 a comprehensive discussion on the lahar problem in the Campanian Plain.

117

## 118 **2. Geological setting**

119 The study area is part of the Campanian Plain, which includes the lowlands surrounding Mount  
120 Vesuvius volcano and the nearby Apennine ridges and valleys (Fig. 1). The orography of the area is  
121 characterized by three WNW-ESE trending mountain ridges that border eastward the plain, with an  
122 elevation ranging from 500 to 1600 m a.s.l., and slope angles from 30 to 60°. From north to south,  
123 the Avella-Partenio, Lauro-Visciano and Sarno-Quindici mountain ridges are separated by two  
124 depressions: the Avella-Baiano Valley, in which the alluvial plain of the Clanio river occurs, and the

125 Lauro valley. Both are narrow valleys that widen toward north-west, among the cities of Cicciano,  
 126 Nola and Palma Campania (Fig. 1). The reliefs are characterized by a high drainage density,  
 127 associated with a poorly developed and torrential hydrographic network, which over time has favored  
 128 the incision and dismantling of the pyroclastic cover on the ridges, and the development of numerous  
 129 detrital conoids that connect with the main valley floor (Di Vito et al., 1998).

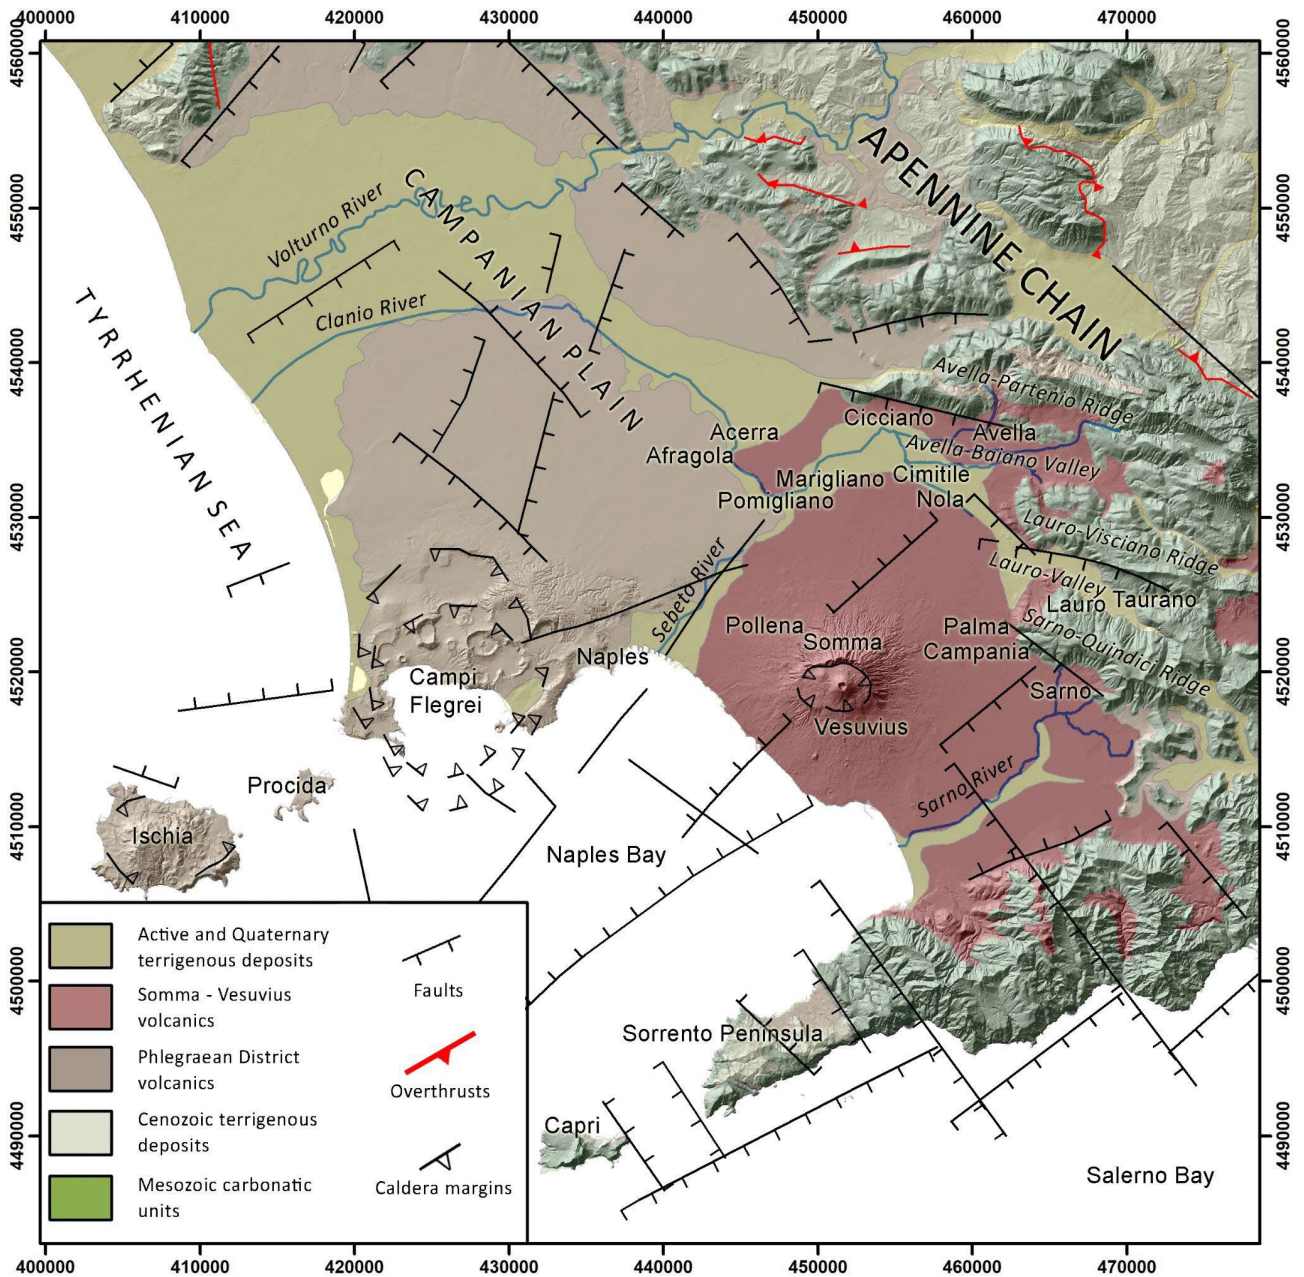

130  
 131 Fig. 1. Geological and structural sketch of the Campania Region on a Shaded Relief derived from TIN ITALY DEM. The  
 132 coordinates are expressed in WGS 84 UTM N33 (modified after Orsi et al., 1996).

133

134 Vesuvius, or more properly Mt. Somma-Vesuvius, is a composite central volcano less than 39,000  
135 years old, composed of the remnant of the oldest Mt. Somma edifice, dismantled by repeated episodes  
136 of caldera collapse, and the more recent Mt. Vesuvius, grown inside it. Its volcanic history is  
137 characterized by an initial phase, dominated by low-energy effusive and explosive eruptions, which  
138 ended at around 22,000 years ago. Since then, the volcano generated four Plinian eruptions with VEI  
139 5-6, each preceded by long periods of quiescence and all accompanied by a summit caldera collapse  
140 (Somma caldera; Cioni et al., 1999). The last Plinian eruption occurred in 79 CE and once again  
141 modified the Somma caldera, inside which the recent cone has subsequently grown due to an  
142 alternation of periods of open conduit, persistent Strombolian and effusive activity, and long periods  
143 of quiescence with obstructed conduit, interrupted by high-energy sub-Plinian eruptions. In historical  
144 times, the other more energetic events were the sub-Plinian ‘Pollena’ (472 CE) and 1631 eruptions  
145 (Santacroce et al., 2008). The last eruption occurred in 1944 and caused the return to obstructed  
146 conduit conditions, which characterize the current quiescent phase of the volcano. The rocks  
147 composition varies from slightly silica-undersaturated (K-basalt to K-trachyte) to highly silica-  
148 undersaturated (K-tephrite to K-phonolite). The Somma-Vesuvius complex is characterized by a  
149 well-developed radial drainage network, which feeds an extensive volcanoclastic apron that  
150 morphologically connects the edifice with the surrounding plain (Santacroce et al., 2003). It  
151 represents the active southern termination of the Plio-Quaternary volcanic chain that borders the  
152 eastern Tyrrhenian margin (Peccerillo, 2003). Volcanism in this margin is related to the extensional  
153 tectonic phases that accompanied the anticlockwise rotation of the Italian peninsula, during the  
154 complex interaction between the Africa and Eurasian plates, which generated the Apennine thrust-  
155 and-fold belt (Ippolito et al., 1973; D’Argenio et al., 1973; Finetti and Morelli, 1974; Bartole, 1984;  
156 Piochi et al., 2004; Patacca and Scandone, 2007; Vitale and Ciarcia, 2018). The extension along the  
157 Tyrrhenian margin of the Apennine chain was accommodated by the activation of NW-SE normal  
158 faults and NE-SW normal to strike-slip transfer fault systems, which dismembered the chain in horst  
159 and graben structures, and allowed magmas to reach the surface and feed the volcanism (Mariani and

160 Prato, 1988; Faccenna et al., 1994; Acocella and Funiciello, 2006). The Campanian Plain is one of  
161 these grabens that hosts the Neapolitan volcanic area. It is a NW-SE elongated structural depression,  
162 filled by a thick sequence of marine and continental sedimentary deposits, and volcanic-volcaniclastic  
163 successions that compensated its subsidence, leading to a complete emersion at around 39 ka  
164 (Brocchini et al., 2001; De Vivo et al., 2001; Santangelo et al., 2017). This graben is bordered toward  
165 NW, NE and SE by the Meso-Cenozoic carbonate and terrigenous successions of the Apennine chain,  
166 and is subdivided in minor NE-SW oriented horst-and-graben structures (Carrara et al., 1973; Finetti  
167 and Morelli, 1974; Fedi and Rapolla, 1987; Brancaccio et al., 1991). Neapolitan volcanoes lie on  
168 these second-order structural highs (Marotta et al., 2022 and reference therein), and the products of  
169 their most powerful eruptions blanketed the Apennine reliefs and filled their valleys with several  
170 meter-thick covers of pyroclastic fall deposits, composed of pumice lapilli and ash layers separated  
171 by paleosols (Pareschi et al., 2002; Bisson et al., 2007; Cinque and Robustelli, 2009; Gurioli et al.,  
172 2010).

173 In terms of water drainage, the pyroclastic cover has peculiar geotechnical characteristics, such as a  
174 positive correlation between grain-size and permeability, which enabled the development of lahars in  
175 the area. In particular, coarser pumice layers are characterized by inter-clast void spaces that control  
176 water accumulation, instead ash layers, soils and paleosols by a high water retention capacity  
177 (Andosol-like soils), so that the differential behavior can regulate equilibrium among deposits  
178 stability vs. remobilization (Fiorillo and Wilson, 2004).

179 Regarding the volcanic activity of Vesuvius in the last 2,000 years, the largest eruptions after the 79  
180 CE Plinian one were two sub-Plinian eruptions, the 472 CE Pollena and 1631 ones, but several other  
181 effusive and explosive events occurred in historical times. In the Campanian Plain, lahar deposits  
182 related to these two eruptions are quite abundant due to past heavy rains (Fiorillo and Wilson, 2004;  
183 Zanchetta et al., 2004b; Stanzione et al., 2023), also the sub-Plinian scenario is of interest for civil  
184 protection purposes, which is why in the present work we focus on the 472 CE Pollena and 1631  
185 eruptions. A particular attention is given to the distribution of the primary pyroclastic deposits and

186 related syn-eruptive lahars, which are mass flow events directly related to specific eruptions, even if  
187 the condition is not necessarily that of an event contemporaneous to the eruption. Those deposits are  
188 mainly composed of >90% fragments from the parental eruption, while the remaining fragments  
189 pertain to other eruptions mixed by volcanoclastic colluvium (Sulpizio et al., 2006). The syn-eruptive  
190 feature is thus related to the remobilization of pyroclastic deposits more than to the exact timing of  
191 lahar emplacement, the latter being of the order of max a few years (before humification processes or  
192 significant human activities can occur). Such a feature distinction is important because directly related  
193 to volcanic hazard.

194

### 195 **3. Materials and methods**

#### 196 **3.1. Evidence from historical sources**

197 We collected data from historical sources, maps, documents, and newspapers to supplement the  
198 geological data, gathered directly or indirectly, for the definition of the areal distribution of the syn-  
199 eruptive and post-eruptive lahar deposits at Vesuvius and in the surrounding region. Such collection  
200 concerned the phenomena that took place starting from the sixteenth century CE to 2005. This time  
201 span has been chosen depending on data availability, and to show the high recurrence of events over  
202 time in the area. The data were collected and grouped not only by years but also by the municipal  
203 areas existing at those times. It should be noted that the distribution of the data can be affected by the  
204 different urbanization over time, and by the presence of damage to people, infrastructures and goods,  
205 economic activities and settlements. In the absence of local weather data series over the analyzed  
206 period, we assumed that the phenomena of remobilization of the pyroclastic deposits, and the  
207 consequent generation of large flooding events and volcanoclastic mass flows, coincided with extreme  
208 weather events often described and reported in the analyzed sources. We identified about 500  
209 individual reports, covering events between the sixteenth century CE and 2005 that took place in 97  
210 different municipalities. The data were organized in a geospatial database, so that it was possible to

211 define different areas affected by frequent syn-eruptive floods and lahars, concomitant/related with  
 212 the sub-Plinian eruption of 1631, to be used as benchmark for the main geological analyses. We could  
 213 not add the Pollena eruption to this historical data set, as there are no available sources for similar  
 214 occurrences other than documents deriving from archaeological excavations (see next sections).  
 215 The municipalities with the highest number of reports are: Sarno (43), Salerno (32), Siano (26), Vietri  
 216 sul Mare (22), Bracigliano (21), Nocera Inferiore (20), Maiori (19), Quindici (17) (Fig. 1). The events  
 217 of greatest intensity, which affected more than five municipal territories at the same time, are 19.  
 218 Some of these occurrences result closely connected with the volcanic events of Vesuvius, such as  
 219 those that occurred in 1631, 1823, 1910, 1949 and 1954, simultaneously or within months to a few  
 220 years after the Vesuvius eruptions of 1631, 1822, 1906 and 1944.

| <b>Eruption</b> | <b>Lahar/Intense Alluvial Event</b> | <b>Municipalities affected</b>                                                                                                                                                                                                                                                      |
|-----------------|-------------------------------------|-------------------------------------------------------------------------------------------------------------------------------------------------------------------------------------------------------------------------------------------------------------------------------------|
| December 1631   | 16/12/1631                          | Sant'Anastasia, San Giorgio a Cremano, Massa di Somma, Somma, Ottaviano, San Sebastiano, Trocchia, Torre del Greco, Portici, Pugliano, Madonna dell'Arco, Palma, Nola Arpaia, Arienzo, Cicciano, Marigliano, Benevento, Avellino                                                    |
| October 1822    | 24/01/1823                          | Amalfi, Bracigliano, Cava de' Tirreni, Cetara, Minori, Nocera Inferiore, Pagani, Salerno, Sant'Egidio del Monte Albino, Tramonti, Vietri sul Mare                                                                                                                                   |
|                 | 12/02/1823                          | Maiori                                                                                                                                                                                                                                                                              |
|                 | 12/04/1823                          | Sarno                                                                                                                                                                                                                                                                               |
|                 | 18/10/1823                          | Corbara, Praiano, Sant'Egidio del Monte Albino, Sarno, Siano                                                                                                                                                                                                                        |
|                 | 15/11/1823                          | Salerno                                                                                                                                                                                                                                                                             |
| April 1906      | 24/10/1910                          | Amalfi, Boscotrecase, Cercola, Cetara, Ercolano, Giffoni Valle Piana, Maiori, Marano di Napoli, Minori, Napoli, Pollena Trocchia, Torre del Greco, Vico Equense, Vietri sul Mare, Sant'Anastasia, San Giorgio a Cremano, Sarno, Scala, Pomigliano d'Arco, Portici, Ravello, Salerno |
| March 1944      | 02/10/1949                          | Lauro, Maiori, Minori Nocera Inferiore, Sarno, Vietri sul Mare                                                                                                                                                                                                                      |
|                 | 25/10/1954                          | Cava de' Tirreni, Maiori, Minori, Nocera Inferiore, Salerno, Tramonti, Vietri sul Mare                                                                                                                                                                                              |

221 Tab. 1. Historical archive of lahar and alluvial events related to the four most significant Vesuvius eruption in the last  
222 four centuries, and municipalities affected by such events.

223 The absence of information in the Lauro and Avella-Baiano valleys is likely due to the absence of  
224 detailed descriptions of alluvial events, or most likely to the position of the inhabited areas generally  
225 located on the hills thus far from the lower part of the valleys. The investigated area was affected  
226 many times by post-eruptive lahar events due to the presence of thick variably-weathered pyroclastic  
227 deposits mantling the steep slopes of Somma-Vesuvius and Apennines. One of the most recent event  
228 occurred on May 5<sup>th</sup> 1998, when a 16-hours prolonged heavy rainfall triggered a huge number of  
229 Apennine slope failures toward the towns of Quindici, Bracigliano, Siano, Sarno and San Felice a  
230 Canello, all located near the Apennine ridges east-northeast of Somma-Vesuvius (Fig. 1). This  
231 catastrophic event involved an extension area of around 60 km<sup>2</sup>, and a volume of more than 2x10<sup>6</sup> m<sup>3</sup>  
232 (40% derived from materials eroded along the channels), causing 160 victims and severe damages to  
233 the quoted towns (Di Vito et al., 2019 and references therein).

234

### 235 **3.2. Field and archaeological investigations**

236 We used a set of geological, stratigraphical, sedimentological, archaeological, and pedological  
237 information for the reconstruction of the type of events, their emplacement mechanisms, timing, and  
238 impact on pre-existing structures/environment. Such an approach enabled us to cross-check  
239 geological and archaeological evidence allowing us to accurately fix the age of events. Conversely,  
240 the presence of well-dated primary pyroclastic deposits can define the age of human traces otherwise  
241 not easily datable. Furthermore, the identification of the “primary” (fallout and pyroclastic current,  
242 along with the archeological findings) can give the absolute age (*ante* or *post quem*) of a given deposit.  
243 The definition of isochronic paleosurfaces can also contribute to the reconstruction of the paleo-  
244 environments affected by the deposition, and of the variations that occurred during depositional  
245 processes. For this purpose, particular attention was paid to the basal contacts between the deposits.



246 In some areas like Nola (10-15 km from Apennine source valleys), the lahar deposits directly overlie  
247 the primary pyroclastic deposits (both for the 472 CE Pollena and 1631 eruption), while in other areas  
248 some pyroclastic units or the whole primary deposits are missing (eroded) or lacking. Only the  
249 correlation with the nearby areas permitted to define whether the emplacement of the lahars eroded  
250 partly or significantly the underlain primary deposits, vice versa the complete absence in the  
251 emplacement areas could also be due to the distribution of these latter. The analysis of the internal  
252 structure marked by sharp changes in grain sizes, color, presence of erosional unconformities, or  
253 interposition of lenses of coarser material also permitted the identification of one or more flow units  
254 within the same individual deposit package. The macroscopic characteristics of the sequences  
255 permitted some inferences on the transport and depositional mechanisms, while the grain-size and  
256 componentry analyses provided information on the source deposits that were remobilized. This brings  
257 to another important definition, that is syn-eruptive vs. post-eruptive lahars, according to the  
258 definition of Sulpizio et al. (2006) and Iverson and Vallance (2015), which applies during or soon  
259 after the eruption vs. several years to centuries after the eruption ended, respectively. The  
260 macroscopic analysis allowed us to distinguish between the syn-eruptive and post-eruptive deposits.  
261 The first ones are defined by the occurrence of pyroclastic components with a lithology similar to the  
262 one of the primary deposits. The second ones are characterized by some evidence of depositional  
263 stasis like humified paleosurfaces below the lahar deposits or of anthropogenic activities, or by the  
264 presence of humified material and/or fragments of older eruptions in the deposits. All these  
265 characteristics allowed the correlation between the various volcanoclastic units for the whole set of  
266 the studied sequences, marking the differences needed to hypothesize on the source and invasion  
267 areas.

268 We reviewed all the volcanological and archaeological data collected during the last 20 years from  
269 drill cores, outcrops, archaeological excavations, and from the existing literature, in collaboration  
270 with colleagues of the Archaeological Superintendence of Campania region. The preliminary  
271 collection and analysis of the existing data permitted to plan a hundred of new stratigraphic trenches

272 (Fig. 2), with the aim of collecting stratigraphic, sedimentological, lithological and chronological data  
273 on the primary pyroclastic and secondary (lahar) deposits. Particular attention was also paid to the  
274 geometric relations of these deposits with the paleotopography and preexisting anthropogenic  
275 structures.  
276

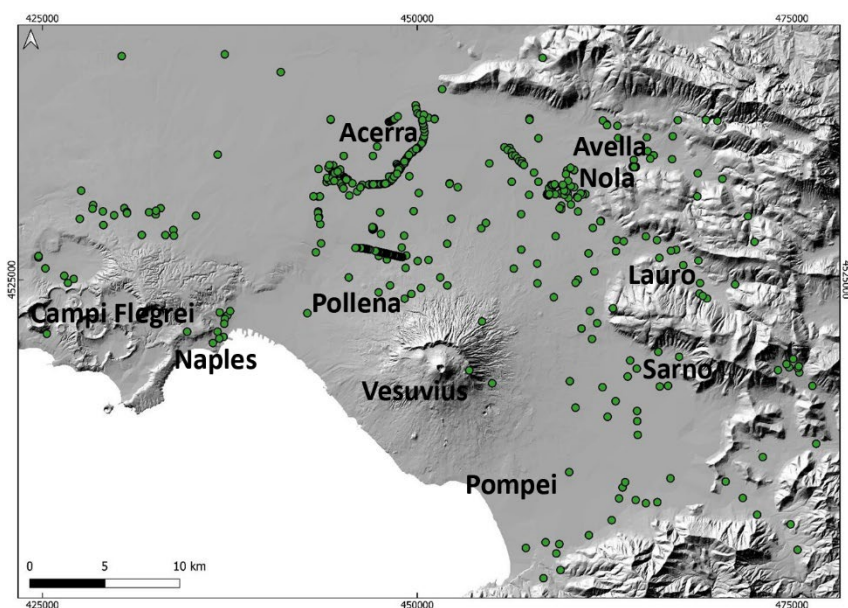

277  
278 Fig. 2. Shaded relief of the studied area and location of all the sites where stratigraphic analyses were carried out.

279  
280 The collected data were organized into a geospatial database (QGIS Platform), in which each point  
281 represents an investigated site linked to a series of information, such as the precise location, type of  
282 volcanic sequence, and stratigraphic features (primary and secondary units, thickness, type of deposit,  
283 etc...). The data were visualized using a Digital Elevation Model (DEM) of the Campanian Plain as  
284 reference topography and the UTM WGS 84 – Zone 33N reference projection.

### 285 286 **3.3. Geomorphological analysis**

287 This analysis is aimed at identifying the macro-basins that fed the lahars in the study area after the  
288 two sub-Plinian eruptions (Pollena and 1631). The analysis was carried out on the basis of the slopes  
289 distribution and the watersheds extracted from a Digital Elevation Model (DEM). The DEM was

290 derived from a LiDAR flight of 2012 (cell size of 10 m). In particular, six macro-basins characterized  
291 by slopes  $> 20^\circ$  were identified in the Somma-Vesuvius area, whereas fifteen macro-basins with  
292 slopes  $> 25^\circ$  were identified in the Apennines to the East of the volcano (Fig. 3). The different slopes  
293 thresholds are defined starting from previous studies (Pareschi et al., 2000, 2002; see also Bisson et  
294 al., 2013, 2014), and on the basis of a better analysis of the physical characteristics of the remobilized  
295 material, in turns related to the various types of deposits. In fact, on the steep slopes and in the valleys  
296 of Somma-Vesuvius the deposits are mainly ash-rich pyroclastic current deposits and subordinately  
297 lapilli fallout deposits, while on the Apennines they are ash and lapilli fallout deposits. Each basin  
298 was considered as a single feeding unit for the lahars generation, and this is an input for the modeling  
299 of possible future lahars in the companion papers (de' Michieli Vitturi et al., this issue; Sandri et al.,  
300 this issue).

301

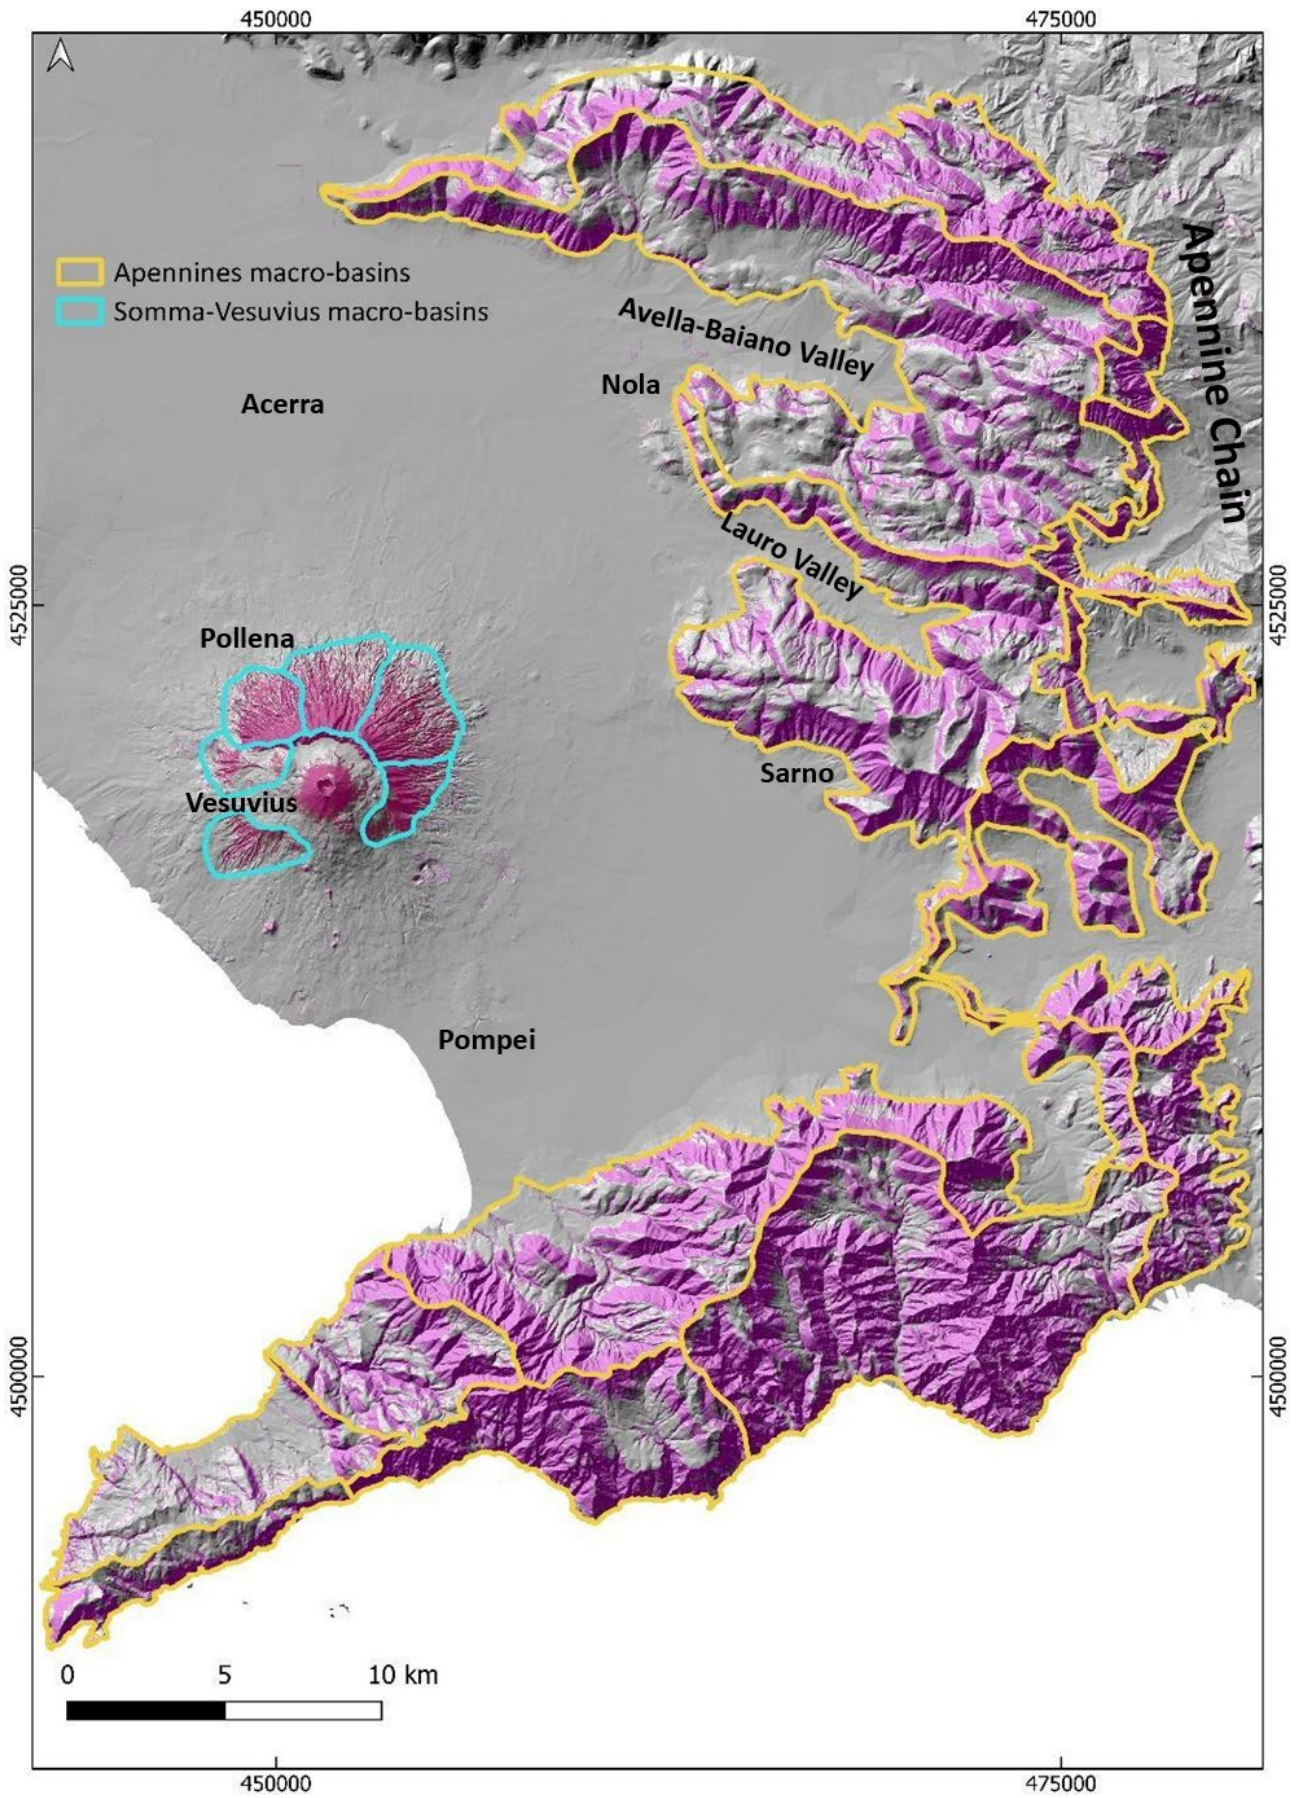

303 Fig. 3. The macro-basins defined on the basis of their geomorphological features to study the areas of possible  
304 accumulation and mobilization of deposits, which are used in modeling lahar generation of future events.

305

### 306 **3.4. Laboratory and analytical work**

#### 307 **3.4.1. Grain-size**

308 In selected studied sites reported in Fig. 4, macroscopic analyses of the stratigraphic sequences were  
309 carried out in the field to first identify any homogeneities or similarities between the juvenile fraction  
310 of the primary and secondary deposits, and then recognize the various volcanoclastic units. This was  
311 followed by sampling the deposits and carrying out the laboratory analyses.

312 In particular, the sampling was mostly made on the syn-eruptive lahar deposits, but also on the post-  
313 eruptive and, in a few cases, on the primary pyroclastic deposits. All lab analyses were performed in  
314 the laboratories of sedimentology and optical microscopy at the Istituto Nazionale di Geofisica e  
315 Vulcanologia, Sezione di Napoli Osservatorio Vesuviano (INGV – OV). The material samples were  
316 pre-heated at a temperature of 60-70 °C to eliminate any fraction of humidity, then were quartered  
317 and sieved. To avoid any breaking of fragile clasts like pumices, the dry sieving of the grain-size  
318 classes between -4 (a coarse limit variable depending on the sample) and 0 phi was made manually,  
319 while for the classes between 0.5 and 5 phi a mechanical sieving apparatus was used.

320 In particular, the fine ash-rich deposit samples with a high degree of cohesion (with a significant  
321 amount >0 phi) were diluted in distilled water, then boiled to remove all ash aggregates, before being  
322 analyzed for grain-sizes following a wet procedure, and finally dried and weighted by classes. The  
323 cumulative class >5 phi was further separated by interpolation modelling (de'Michieli Vitturi et al.,  
324 this issue). In the post-processing of the data, the GRADISTAT excel package by Blott and Pye  
325 (2001) was used to determine the main statistical parameters. On selected samples, a microscopic  
326 componentry analysis was performed, consisting of recognizing and separating the various lithotypes  
327 that compose the volcanoclastic deposits, that is juvenile, lithic and crystal clasts. The clasts

328 recognition was made manually for the coarser fractions, while for the finest fractions it was  
329 necessary the use of a reflected-light binocular microscope.

330

331

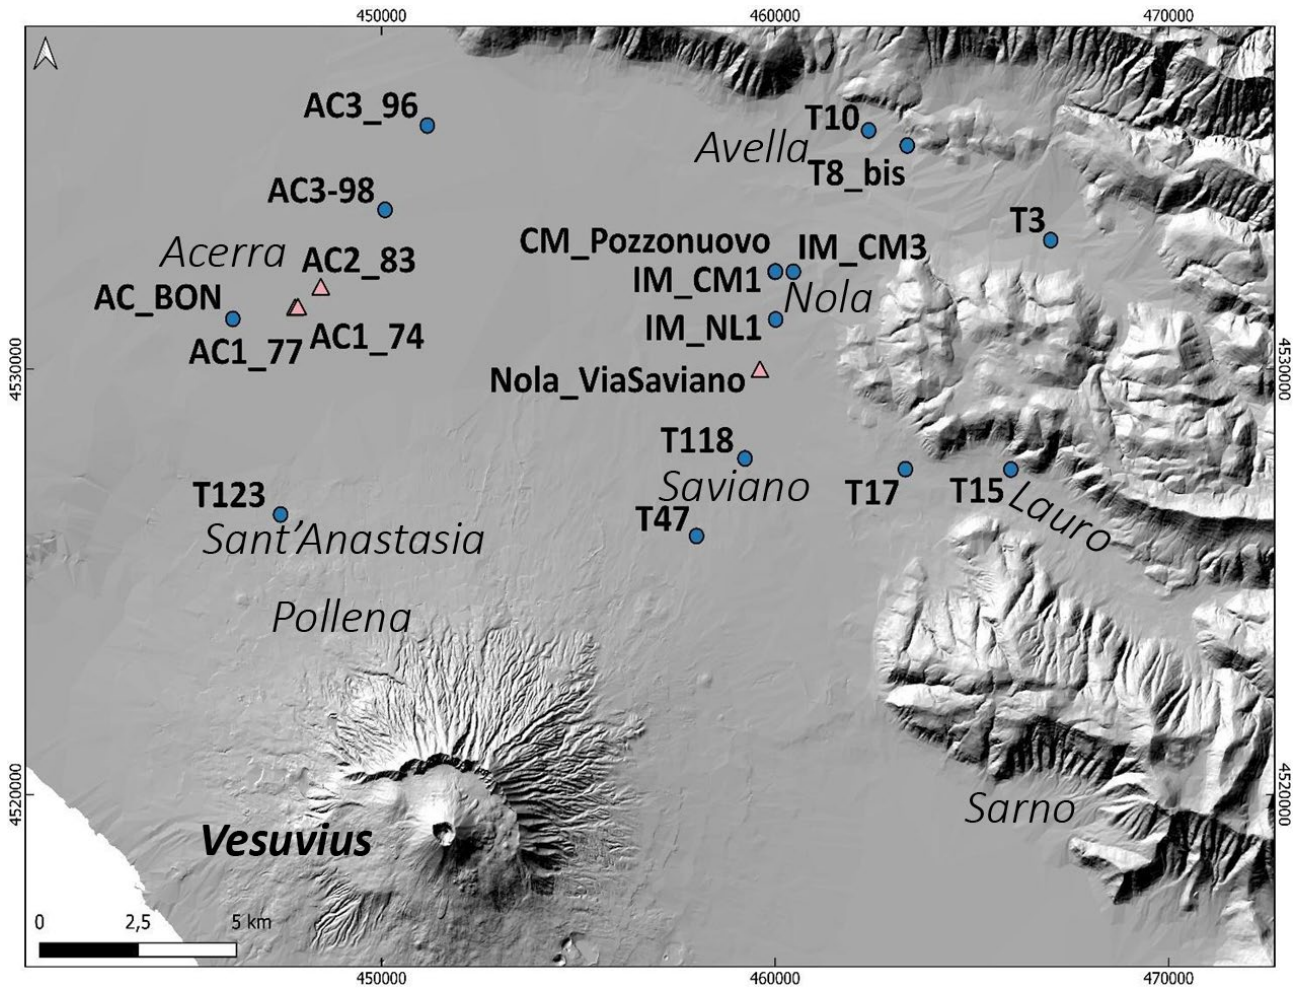

333 Fig. 4. Location of sites in which the sampling was carried out for sedimentological and paleomagnetic analyses. The  
334 pink triangles represent the sites for which a paleomagnetic study was carried out (AC1\_74, AC1\_77, AC2\_83, and  
335 Nola\_Via Saviano). In several sites, multiple samples were taken at different stratigraphic heights; samples labeled with  
336 US were taken at CM\_Pozzuovo site (see results).

337

### 338 3.4.2. Input for impact parameters

339 A significant number of large clasts and boulders was also found embedded in the lahar deposits at  
340 different locations. These clasts have dimensions from several centimeters to several tens of  
341 centimeters in diameter, and their nature is variable, that is limestone, ceramic, brick, tephra, lava,  
342 sandstone, iron (in order of abundance). Most of the clasts are fragments of artifacts from buildings,  
343 structures, and other archaeological finds of the Roman period, and their shape can be approximated  
344 in the field to ellipsoid. All these features suggest that they were entrained from substrate into the  
345 lahars to ultimately be deposited together with the main finer solid load of the lahars. In the dynamics  
346 of volcanoclastic mass flows like lahars and pyroclastic currents, the occurrence of boulder  
347 entrainment by flow dynamic pressure is recognized as a quite common feature (e.g., Zanchetta et al.,  
348 2004a; Pittari et al., 2007; Duller et al., 2008; Toyos et al., 2008; Cas et al., 2011; Carling, 2013;  
349 Doronzo, 2013; Jenkins et al., 2015; Roche, 2015; Martí et al., 2019; Guzman et al., 2020). The  
350 capability of a flow to entrain a clast is a function of flow properties (velocity, density) and clast  
351 properties (dimension, density, shape), and dynamic pressure well synthesizes and quantifies such  
352 capability also in terms of flow hazard (Toyos et al., 2008; Zuccaro and De Gregorio, 2013; Jenkins  
353 et al., 2015). In Appendix A, a theoretical scheme is presented to invert these field features for  
354 calculation of the impact parameters at local scale.

355

### 356 **3.4.3. Rock magnetism**

357 The lahar deposits related to the Pollena eruption were analyzed by rock magnetism in the  
358 municipalities of Acerra (12 km from Somma-Vesuvius) and Nola (10-15 km from 10-15 km from  
359 Apennine source valleys) at four localities (Fig. 4), where the lahars interacted with anthropogenic  
360 structures. At each locality, we collected oriented samples, then measured about 200 specimens. We  
361 sampled both the deposit matrix and some potsherds embedded along three trenches (74, 77 and 83)  
362 and in the “Nola-Via Saviano” excavation. The purpose of the magnetic measurements was threefold:  
363 i) evaluating the magnetic fabric of the deposits to infer the local to regional flow directions of the

364 lahars and possibly their origin, whether from the Apennines or Vesuvius. The magnetic fabric in this  
365 type of deposits records the main flow direction (local/regional) followed during the emplacement  
366 processes; ii) estimating the deposition temperature ( $T_{dep}$ ) of the deposits, to understand whether the  
367 lahar was triggered soon after the eruption or at later times. The hypothesis is that the temperature is  
368 higher in case of syn-eruptive lahars deriving from hot (pyroclastic current) deposits, and lower in all  
369 other cases; iii) testing the relative sequence (contemporaneity) of the lahars emplacement with  
370 respect to the Pollena eruption. All hand-samples were oriented *in-situ* with magnetic and solar  
371 compasses and reduced to standard sizes at the CIMaN-ALP laboratory (Peveragno, Italy), where all  
372 the magnetic measurements were made. In Appendix B, the adopted paleomagnetic techniques and  
373 nomenclature are described.

374

## 375 **4. Results**

### 376 **4.1. Field stratigraphy and sedimentological features**

377 In this study, data of about 500 sites were collected, covering an area of  $>1000 \text{ km}^2$  from the plain  
378 around the volcanic edifice to the Apennine valleys to the north and east (Fig. 2).

379

#### 380 **4.1.1. Pyroclastic deposits: Pollena and 1631 eruptions**

381 The integration of the collected data with the existing ones (Rosi and Santacroce, 1983; Rosi et al.,  
382 1993; Rolandi et al., 2004; Sulpizio et al., 2005; Perrotta et al., 2006; Bisson et al., 2007; Santacroce  
383 et al., 2008; Gurioli et al., 2010; De Simone et al., 2011) allowed the reconstruction of the distribution  
384 maps for both the fallout and pyroclastic current deposits. In particular, the spatial distribution  
385 highlights that for both the Pollena and 1631 primary deposits, thick fine ash deposits are widely  
386 distributed and cover the coarse fallout sequence or directly the ground, modifying the isopachs  
387 reconstructed by previous authors (Sulpizio et al., 2006 and references therein; Figs. 5 and 6). This



388 enlargement of the area affected can have important implications on the hazard evaluation in terms  
389 of possible damages on a densely inhabited territory.

390 The area covered by the comprehensive isopach maps (including both lapilli and ash fallout) turns  
391 out to be wider than previously known, above all because we took into account for the ash fallout  
392 occurred during the final phreatomagmatic stages of the eruptions (Rosi and Santacroce, 1983;  
393 Sulpizio et al. 2005). The great availability and distribution of these ash deposits could explain the  
394 wide generation and distribution of the syn-eruptive lahars in the area. This has important implications  
395 on the evaluation of the source area and material available for the lahars accompanying and following  
396 these eruptions. Interestingly, there is an increase of the areas covered by pyroclastic deposits. The  
397 QGIS recalculated 10-cm isopach area covered by the fallout deposits is of 837 km<sup>2</sup> (Pollena eruption)  
398 and 528 km<sup>2</sup> (1631 eruption), which compared to the lower values of 569 km<sup>2</sup> (Pollena eruption) and  
399 158 km<sup>2</sup> (1631 eruption) after Sulpizio et al. (2006) give an extra surface of about 47% and 230%,  
400 respectively. Geotechnically, another implication is that the wide presence of fine and cohesive ash,  
401 not only on top of the coarse fallout sequences but also on the ground, preventing water infiltration,  
402 favoring surficial runoff and creating sliding surfaces (Baumann et al., 2020).

403

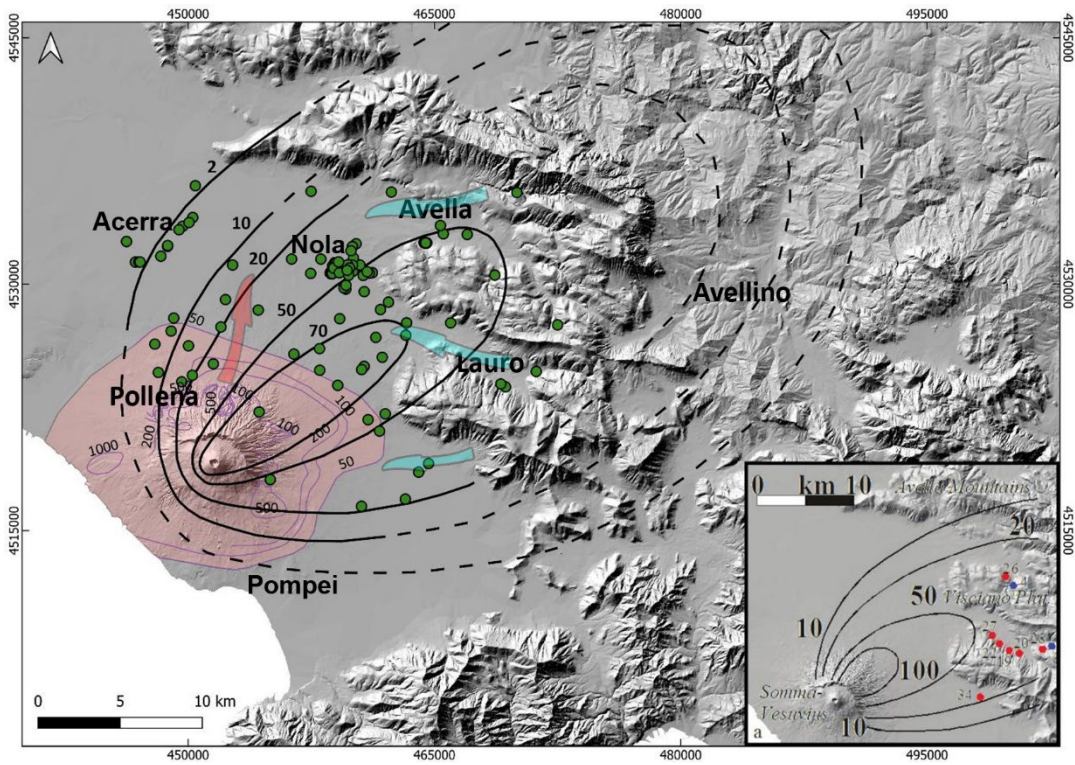

404

405 Fig. 5. Pollena eruption: the black lines represent the isopachs (in cm) of the fallout deposits modified after Sulpizio et  
 406 al. (2006) (in the inset) on the basis of the new collected data (green dots), while in pink is colored the area affected by  
 407 the pyroclastic current deposits (isopachs in cm, purple lines) modified after Gurioli et al. (2010). The dotted isopachs are  
 408 extrapolated. The light blue arrows represent the general remobilization of the pyroclastic fallout deposits and lahar  
 409 propagation from the Apennine slopes, while the pink one represents the combined remobilization of the pyroclastic  
 410 current and fallout deposits and lahar propagation from Somma-Vesuvius.

411

412

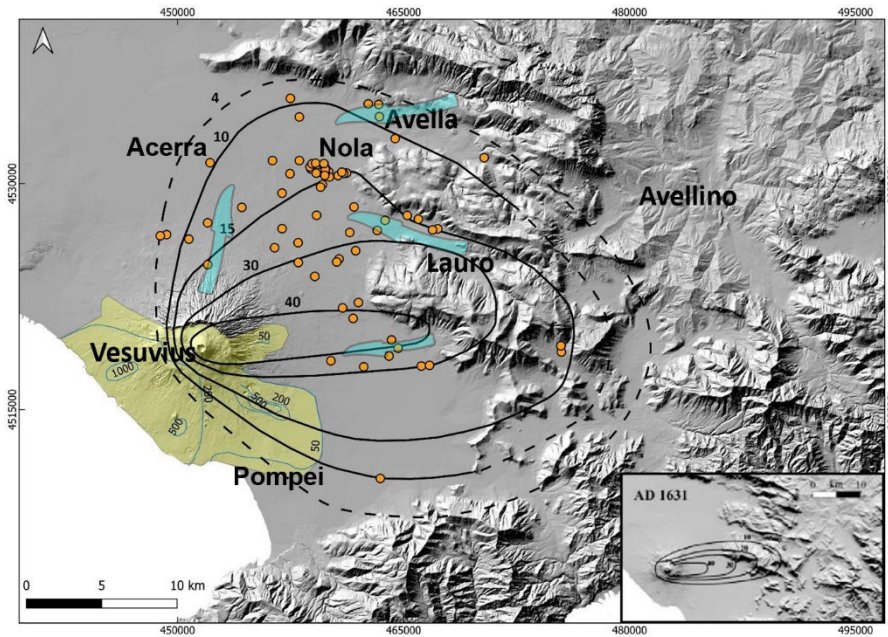

413

414 Fig. 6. 1631 eruption: the black lines represent the isopachs (in cm) of the fallout deposits modified after Santacroce et  
 415 al. (2008) (in the inset) on the basis of the new collected data (orange dots), while in yellow is colored the area affected  
 416 by pyroclastic current deposits (isopachs in cm, light blue lines). The light blue lines represent the inferred distribution  
 417 on the basis of an integration between field data and chronicles modified after Gurioli et al. (2010). The dotted isopachs  
 418 are extrapolated. The light blue arrows represent the general remobilization of the pyroclastic fallout deposits and lahar  
 419 propagation from the Apennine slopes and Somma-Vesuvius.

420

421 The area affected by accumulation of the 1631 eruption tephra-fallout deposits is wider than  
 422 previously known, particularly toward the north, which follows the inclusion of the final ash deposits  
 423 into the new isopachs. Interestingly, such widening of the area agrees with the occurrence of lahars  
 424 in the plain north of Vesuvius, as documented in the historical sources (Rolandi et al., 1993; Rosi et  
 425 al., 1993, and references therein), and as follows.

426

#### 427 4.1.2. Lahar deposits

428 The lithological and sedimentological analyses carried out in the field allowed the macroscopic  
 429 definition of the primary pyroclastic deposits affected by the remobilization, and of the lahar deposits.

430 In many cases, the archaeological findings permitted to define the local paleoenvironment and related  
 431 land use, then permitted to constrain the age and timing of the deposition.  
 432 We grouped all deposit descriptions into representative lithofacies to more directly characterize both  
 433 the primary pyroclastic and lahar deposits (Tab. 2 and Fig. 7). Given the amount of data and  
 434 description of the studied areas, we used these lithofacies to characterize a number of macro-areas  
 435 between the Somma-Vesuvius sector and the nearby Apennine valleys (Appendix C).

| <b>Symbol</b> | <b>Lithofacies</b>                                                                                                                                                                                                                                                                                                        |
|---------------|---------------------------------------------------------------------------------------------------------------------------------------------------------------------------------------------------------------------------------------------------------------------------------------------------------------------------|
| P             | Paleosol and humified surface, massive and composed of fine sand and silt from brown to dark brown, with several percentages of clay and organic matter. It indicates a stasis in the depositional processes.                                                                                                             |
| mL            | Alternation of massive lapilli layers. Pyroclastic fall deposit composed of pumice and scoria lapilli with sparse accidental lithics.                                                                                                                                                                                     |
| mA            | Massive ash. Pyroclastic fall deposit composed of fine to coarse ash with sparse pumice fragments, scoriae and accidental lithics.                                                                                                                                                                                        |
| Gms           | Massive gravel and sand deposit, matrix-supported and poorly-sorted. The matrix is composed of fine to coarse sand, while the gravel clasts comprise scoria and pumice clasts from the pyroclastic fall deposits. The massive feature of the single layers suggests a rapid emplacement from a highly-concentrated lahar. |
| mM            | Massive mud deposit composed of fine sand, silt and clay, sometimes with sparse pumice and lithic clasts. It is generated from a mud-dominated lahar.                                                                                                                                                                     |
| Sh            | Horizontal lamination and bedding features in sands. The deposit is composed of an alternation of fine to coarse sand and gravel, which can be gradual or sharp. It comes from a hyper-concentrated lahar (less dense than the Gms one).                                                                                  |
| Ss            | Scour and fill structures composed of fine to coarse sand, generally with a normal grading. A single structure consists of an erosive, concave upwards basal surface and a planar/convex top.                                                                                                                             |
| fM            | Fine mud deposit composed of fine sand, silt and clay. It is generated when the lahar loses its energy and the fine grains settle gently.                                                                                                                                                                                 |

436 Tab. 2. Symbol and description of the recognized lithofacies, and photos representative of each of them.

437

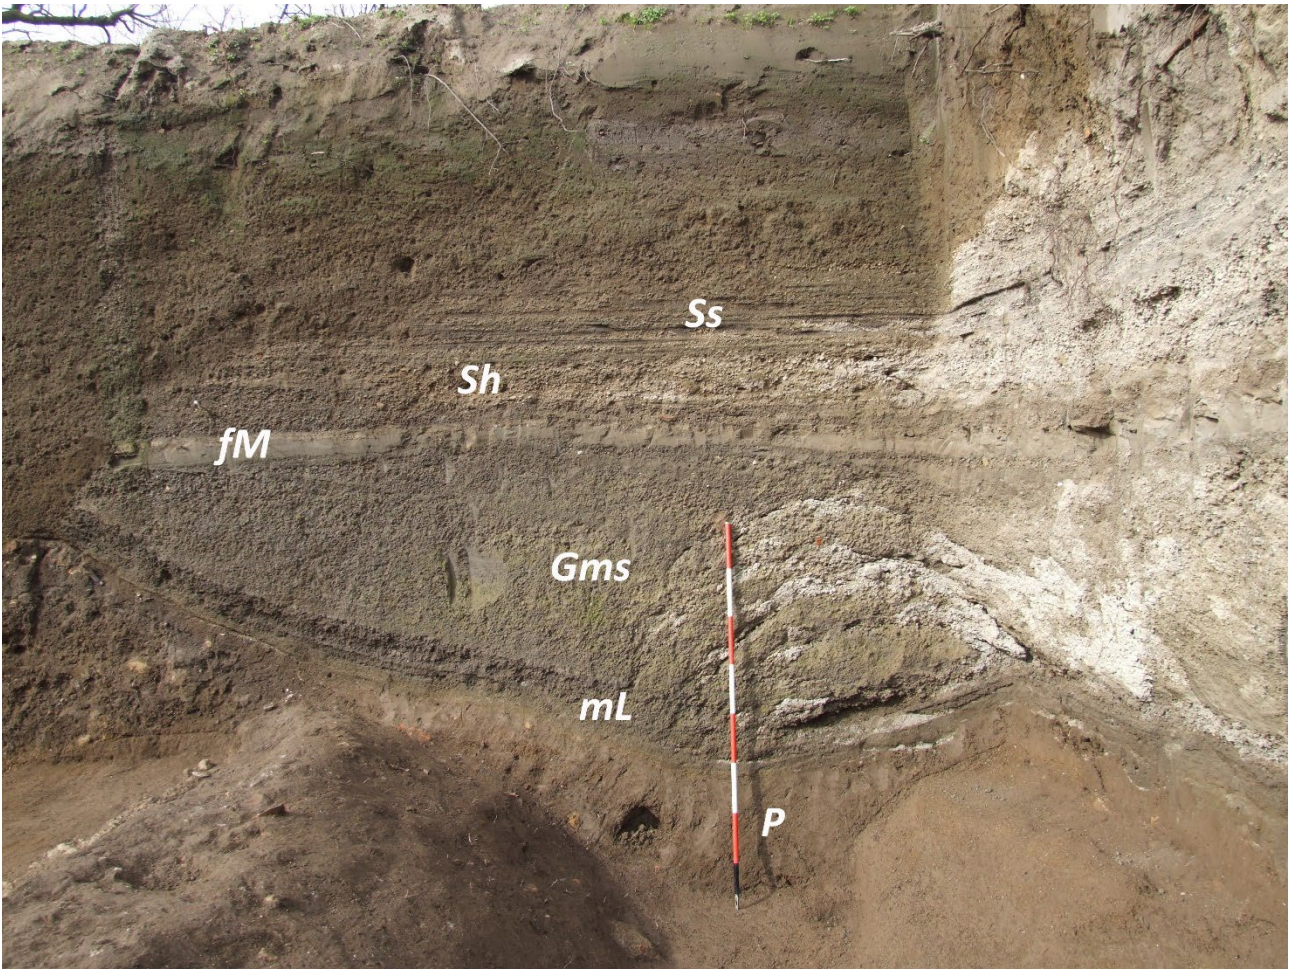

438

439 a)

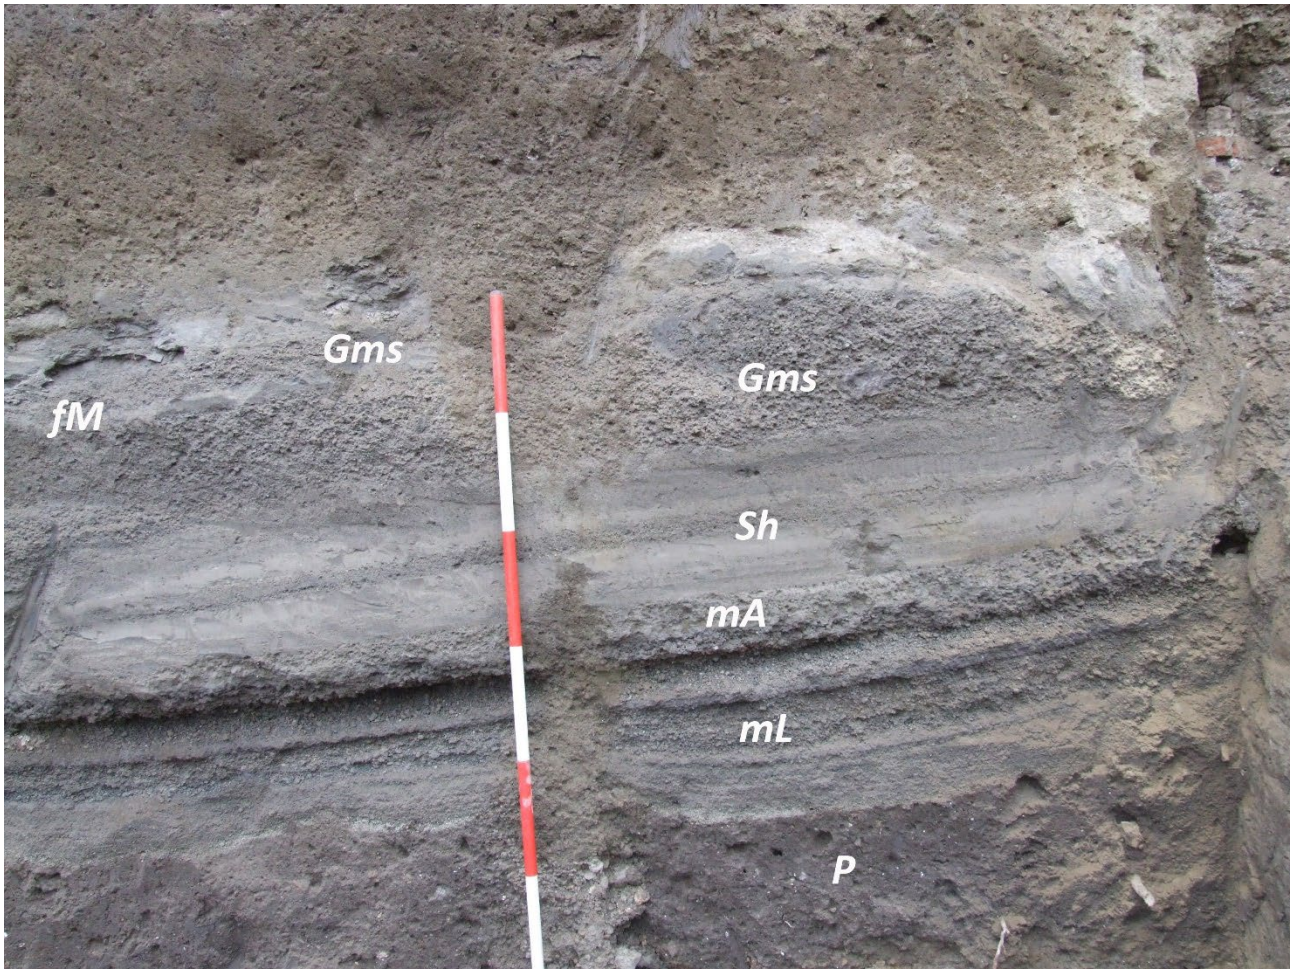

440

441 b)

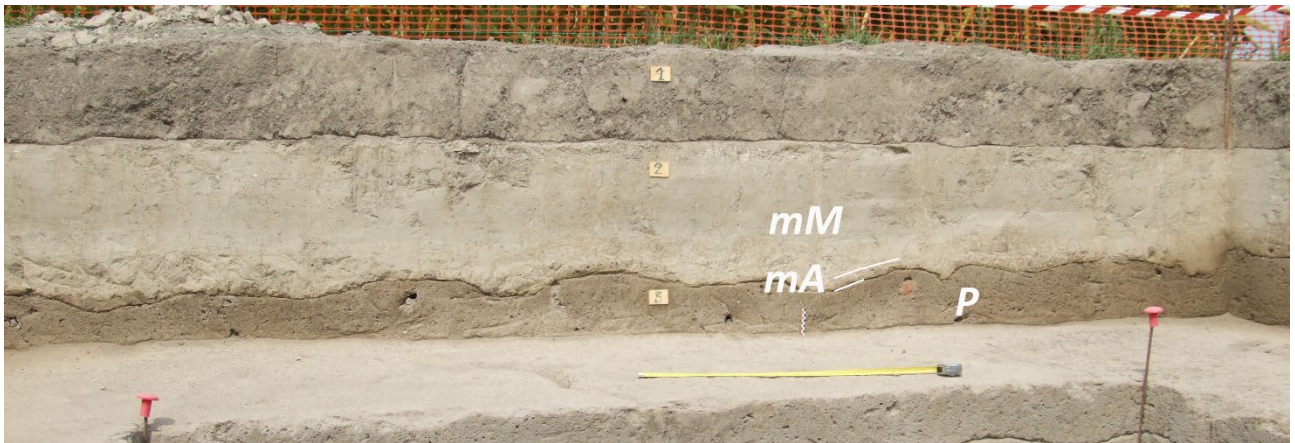

442

443 c)

444 Fig. 7. In these three photos of archaeological excavations (a-b, Nola at 10-15 km from Apennine source valleys; c, Acerra  
 445 at 12 km from Somma-Vesuvius), the main lithofacies recognized in the field are shown, including paleosols, pyroclastic  
 446 deposits, and lahar deposits; the corresponding lithofacies descriptions are reported in Tab. 2.

447

448 Usually, the syn-eruptive lahar deposits directly overlie the primary pyroclastic deposits, sometimes  
449 eroding them. They have a matrix-supported texture and are composed of fine to very fine cohesive  
450 ash, and contain more or less abundant cm-sized pumice and lithic fragments. In general, these  
451 deposits consist of multiple depositional flow units, each one resulting from single-pulse “en masse”  
452 emplacement, the piling of which resulting from rapid progressive aggradation through multiple flow  
453 pulses, in analogy with dense pyroclastic currents (Sulpizio et al., 2006; Doronzo, 2012; Roche, 2012,  
454 2015; Breard and Lube, 2017; Smith et al., 2018; Guzman et al., 2020; see Sulpizio et al., 2014, p.  
455 56). Consequently, the studied lahars were modelled using a shallow layer approach (de’Michieli  
456 Vitturi et al., this issue). The different depositional flow units in the same deposit are distinguishable  
457 (still in continuity) from each other based on vertical granulometric changes, sparse pumice  
458 alignments, deposit layering and/or unconformities. For example, compared to channelized  
459 pyroclastic currents, dense water flows and floods, such depositional units (layers) could have been  
460 repeatedly emplaced, from bottom to top, under accumulation rates of a few tens to hundreds  $\text{kg/m}^2\text{s}$   
461 (Lowe, 1988; Russell and Knudsen, 1999; Whipple et al., 2000; Girolami et al., 2010; Roche, 2015;  
462 Marti et al., 2019; Guzman et al., 2020). In various areas, such rapid sequential emplacement is  
463 suggested by the presence of water escape structures through the whole deposit by crossing the  
464 sequence of several units. These are vertical structures consisting of small “pipes” filled with fine  
465 mud transported by the escaping water, and formed soon after the emplacement of the lahar units.  
466 The textural characteristics are variable even within the same site, but in general the deposits are  
467 massive and contain vesicles, from circular to flattened, coated by fine ash that adhered into the voids  
468 after water loss. For the syn-eruptive lahar deposits, the pumice fragments are those of the primary  
469 deposits. On the other hand, in the upper parts of the sequences it is not uncommon to find units that  
470 contain pumice fragments related to previous eruptions (9.0 ka B.P. "Mercato" and 3.9 ka B.P.  
471 "Avellino" Plinian eruptions), recognizable based on pumice texture and crystal content (Santacrose  
472 et al., 2008). In this second case, the lahar deposits are considered as post-eruptive, meaning that the  
473 pyroclastic deposits older than the two studied sub-Plinian eruptions were progressively involved in

474 an advanced erosion of the slopes and valleys. The presence of slightly humified surfaces below the  
475 lahar deposits or the trace of human artifacts, such as for example excavations, ploughing, etc..., are  
476 considered as evidence of a long period without deposition; also in this case, the lahars are considered  
477 as post-eruptive. In other words, the similar componentry of the lahar and pyroclastic deposits, and  
478 the evidence of short-term exposure between these two, are strong indicators of the syn-eruptive  
479 occurrence of the lahar events. Instead, the absence of such features is more indicative of a post-  
480 eruptive origin, i.e. lahars events more spaced in time from the corresponding eruption.  
481 In Appendix C, a description is reported for some of the most representative sequences, which were  
482 sampled in different areas throughout the plain (Figs. 2 and 4).

483

#### 484 **4.1.3. Distribution maps of the lahar deposits**

485 Here we present distribution maps for the lahar deposits of the Pollena and 1631 eruptions (Figs. 8-  
486 11). The maps show the distribution of all thicknesses detected in the studied sites. In particular, the  
487 syn-eruptive Pollena lahar deposits are distributed in the NW quadrants of the volcano and in the  
488 Avella, Lauro and Sarno valleys (see Fig. 1), with a thickness exceeding 1 m in the Vesuvius apron  
489 and in the plain between Nola and Cimitile at about 10-15 km from Apennine source valleys (see  
490 Figs. 1 and 8). A volume estimation of the remobilized deposits is of the order of  $7 \times 10^7$  m<sup>3</sup> for the  
491 northern Vesuvius area, and  $4 \times 10^7$  m<sup>3</sup> for the Lauro Valley. Such volumes are referred to the  
492 depositional areas, and not to the detachment ones; for the latter see de'Michieli Vitturi et al. (this  
493 issue) and Sandri et al. (this issue). The provenance of the material in each site was inferred by  
494 sedimentological recognition and magnetic reconstruction. Then, the covered areas were subdivided  
495 into polygons in the geospatial database, in order to weight the local deposit thicknesses and estimate  
496 the volumes with a lower approximation.

497



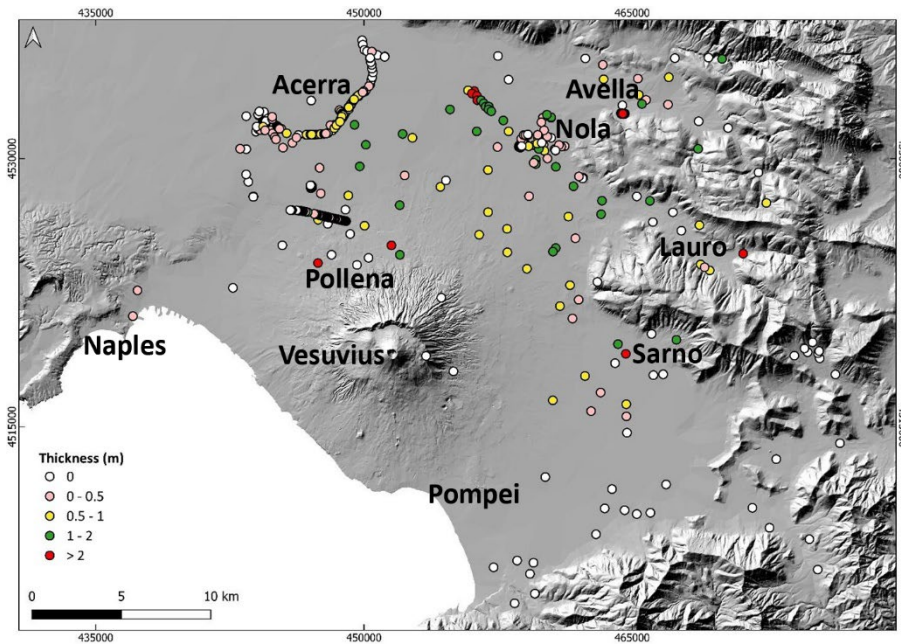

498

499 Fig. 8. Distribution of the syn-eruptive lahar deposits related to the Pollena eruption. The 0 m points represent the studied  
 500 sites where the lahar deposits were absent, and in some cases even the primary pyroclastic deposits below were absent;  
 501 they are reported anyway, as their absence might have not necessarily occurred by no deposition (local erosion).

502

503 The post-eruptive lahar deposits of the Pollena eruption are more distributed in the Avella and Lauro  
 504 valleys, and in the plain north of the volcano close to the apron area (low-angle edifice outer slopes)  
 505 (Figs. 1 and 9). Their deposits contain both fragments from the Pollena eruption and from preceding  
 506 eruptions, suggesting that pyroclastic deposits of the older sequences were progressively eroded and  
 507 involved in remobilization processes over time. As an example, on Fig. C1 it is to remark that whitish  
 508 pumice fragments from the Pomici di Avellino and Mercato eruptions were identified on top of the  
 509 Pollena lahar deposits.

510

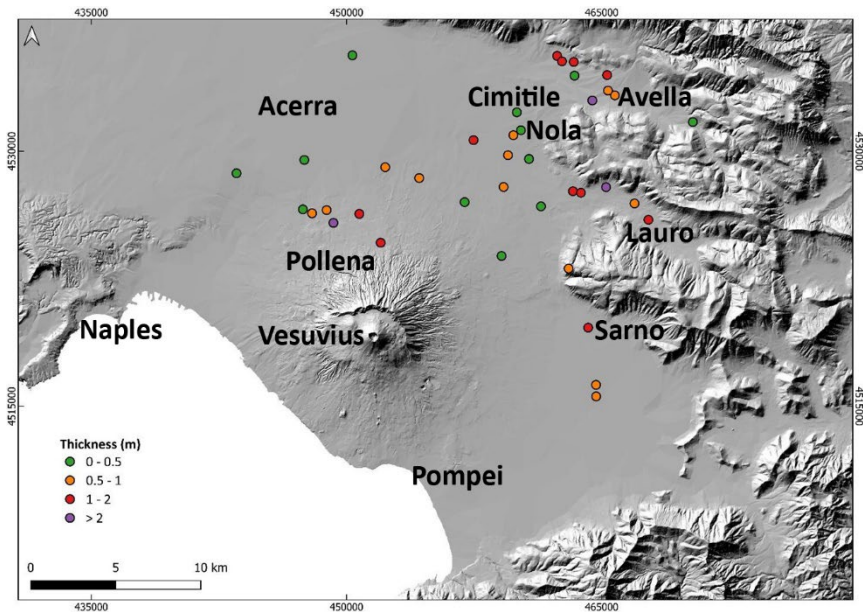

511  
 512 Fig. 9. Distribution of the post-eruptive lahar deposits related to the Pollena eruption.

513

514 The distribution of the syn- and post-eruptive Pollena lahar deposits is related to the primary  
 515 pyroclasts deposition: the dense distribution of the lahar deposits north of Somma-Vesuvius depends  
 516 on the presence of thick pyroclastic current deposits that were remobilized from the northern slopes  
 517 of the volcano, while the distribution in the Apennine valleys is related to the fallout deposits that are  
 518 thicker along the major Pollena dispersal axis (Fig. 5).

519 Above the Pollena pyroclastic and lahar deposits (both syn- and post-eruptive), the studied sequences  
 520 in almost all the sites show the presence of a well-developed soil bed with many traces of cultivation,  
 521 as well as of inhabited areas and buildings (Figs. C1-4). These traces and the presence of the soil bed  
 522 are evidence of a progressive geomorphological stabilization of the territory. The occurrence of the  
 523 1631 sub-Plinian event determined a new phase of marked geomorphological instability for a large  
 524 territory surrounding the volcano. In Fig. 10, it is shown the distribution of the syn-eruptive lahar  
 525 deposits for the 1631 eruption in all the studied areas, having a variable thickness, generally <50 cm.  
 526 Such distribution affected mostly the areas of Acerra-Nola, Sarno, the Vesuvius apron and the  
 527 Apennine valleys (Figs. 1 and 10). Rosi et al. (1993) and Sulpizio et al. (2006) reported that floods  
 528 and lahars heavily impacted (also with injuries and victims) the N and NE quadrants of Somma-

529 Vesuvius soon after the eruption with a timescale of days (Rosi et al., 1993; see also the historical  
 530 chronicles of Braccini, 1632), corroborating the syn-eruptive behavior of such lahars. Some lahar  
 531 deposits are intercalated within the primary pyroclastic deposits, but in general they directly stand on  
 532 top of the pyroclastic deposits (Rosi et al., 1993); both cases unequivocally constrain the syn-eruptive  
 533 behavior of the 1631 eruption lahars.  
 534

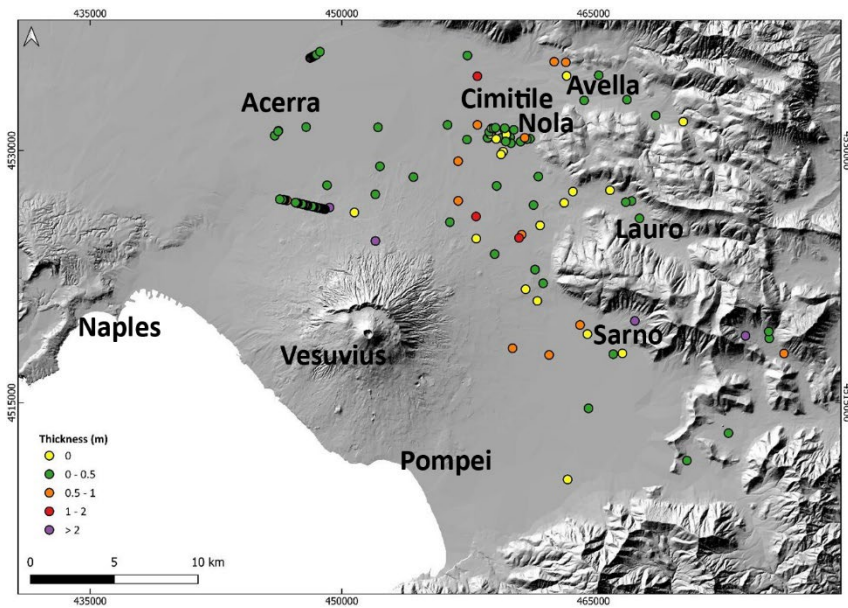

535  
 536 Fig. 10. Distribution of the syn-eruptive lahar deposits related to the 1631 eruption. The 0 m points represent the studied  
 537 sites where the lahar deposits were absent, and in some cases even the primary pyroclastic deposits below were absent;  
 538 they are reported anyway, as their absence might have not necessarily occurred by no deposition (local erosion).

539  
 540 In Fig. 11, minor post-eruptive lahar deposits of the 1631 eruption are reported, with a preferential  
 541 distribution to the E quadrants of the volcano from N to S, both in the plain and the valleys. These  
 542 deposits are still significant, with a thickness of around half a meter to a meter or more in a few points.  
 543

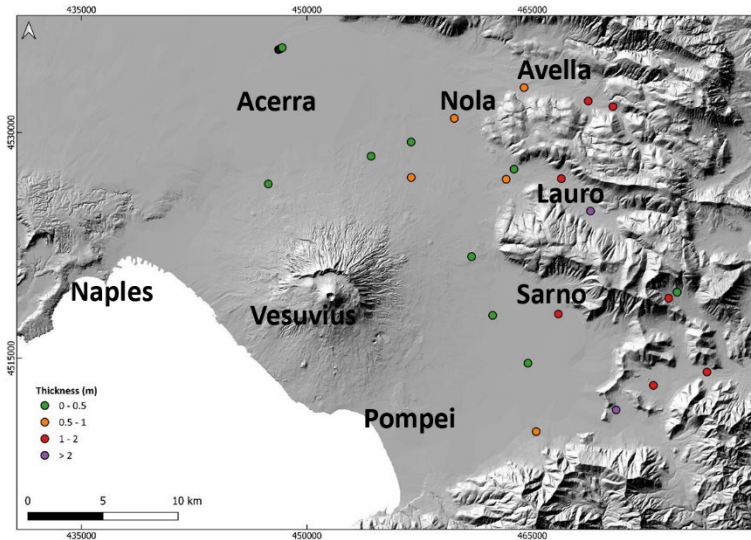

544  
 545 Fig. 11. Distribution of the post-eruptive lahar deposits related to the 1631 eruption.

546  
 547 The distribution of the syn- and post-eruptive 1631 lahar deposits mainly reflects the major dispersal  
 548 axis affecting the fallout deposits distribution, while the pyroclastic current deposits were minorly  
 549 remobilized as exposed on the gentler slopes of southwestern Vesuvius (Fig. 6).

550  
 551 **4.1.4. Sedimentological characteristics of the Pollena lahar deposits**

552 The field analysis was carried out in about 500 different sites for the construction of the database and  
 553 maps, while the laboratory analysis was carried out on 30 samples representative of the different  
 554 areas. The results of the grain-size analyses (cumulative curves and statistical parameters) are  
 555 presented in Fig. 12 and Tab. 1.

556 Petrological analysis on the syn-eruptive lahar deposits have not been performed because the  
 557 lithology (colour, texture, mineral content) of the components is the same as the juvenile material of  
 558 the primary deposits described in Sulpizio et al. (2005). The loose crystals consist of sanidine, leucite,  
 559 biotite and pyroxene fragments. Based on the results of the grain-size analyses, the coarser classes  
 560 are defined from -4 to -1 phi, the medium ones from -0.5 to 2.5 phi, and the finest one from 3 phi.  
 561 The juvenile pumice clasts are an ubiquitous component of the lahar deposits (both syn- and post-  
 562 eruptive), but they decrease with distance for the finer grain-size classes, while the crystal content

563 increases with the same progression. The lithic clasts are abundant for the coarser classes, they  
564 decrease with distance for the medium classes, and increase again for the finer classes.

565

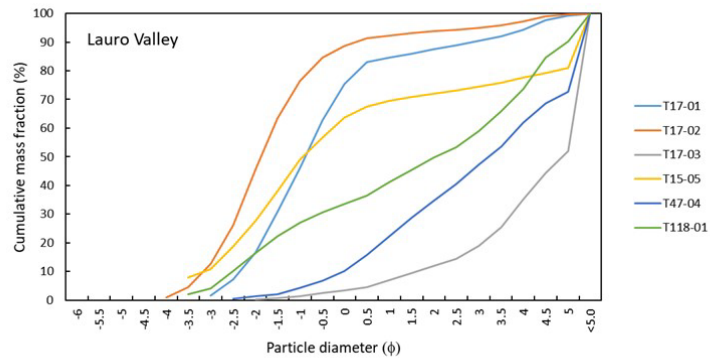

566

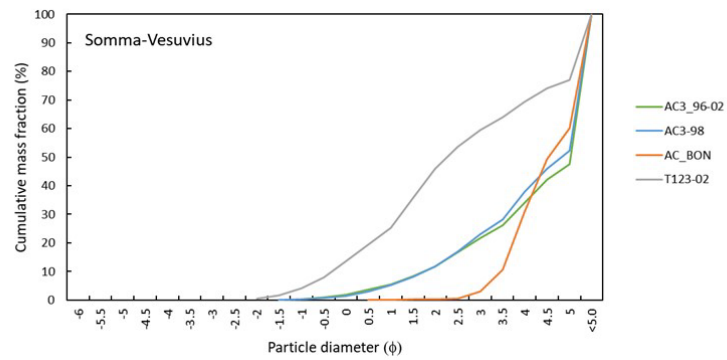

567

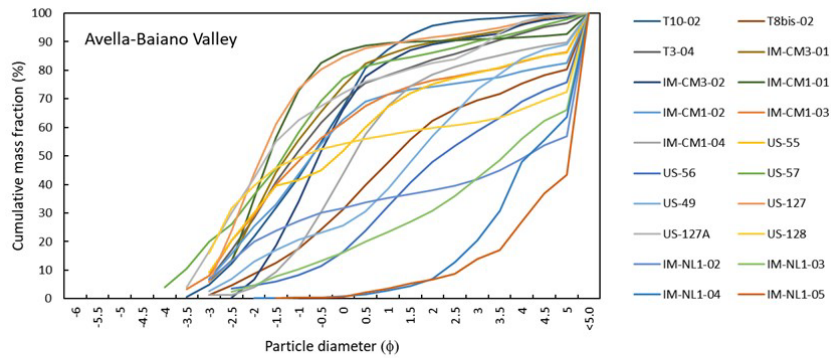

568

569 Fig. 12. Cumulative curves of the grain-size analysis on the samples taken at the locations reported in Fig. 4, and  
 570 subdivided in three sectors: Lauro Valley (top), Somma-Vesuvius (middle), and Avella-Baiano Valley (bottom).

571

572

573

| Sample                      | Mean ( $\phi$ ) | Sorting ( $\phi$ ) | Lithofacies |
|-----------------------------|-----------------|--------------------|-------------|
| <b>Lauro Valley</b>         |                 |                    |             |
| T17-01                      | -0.93           | 1.41               | Gms         |
| T17-02                      | -1.83           | 1.23               | Gms         |
| T17-03                      | 2.42            | 1.46               | Sh          |
| T15-05                      | -1.39           | 1.74               | Gms         |
| T47-04                      | 1.67            | 1.61               | Mm          |
| T118-01                     | 1.13            | 2.7                | Gms         |
| <b>Avella-Baiano Valley</b> |                 |                    |             |
| T10-02                      | -0.78           | 1.47               | Sh          |
| T8bis-02                    | 0.31            | 1.83               | Sh          |
| T3-04                       | -0.95           | 1.83               | Gms         |
| IM-CM3-01                   | -1.13           | 1.54               | Gms         |
| IM-CM3-02                   | -0.48           | 1.35               | Gms         |
| IM-CM1-01                   | -1.66           | 0.86               | Gms         |
| IM-CM1-02                   | -1.17           | 1.62               | Gms         |
| IM-CM1-03                   | -1.13           | 1.83               | Gms         |
| IM-CM1-04                   | 0.06            | 1.39               | Fm          |

|                       |       |      |     |
|-----------------------|-------|------|-----|
| US-55                 | -0.84 | 1.97 | Gms |
| US-56                 | 1.17  | 1.8  | Sh  |
| US-57                 | -1.51 | 1.86 | Gms |
| US-49                 | 0.69  | 2.16 | Gms |
| US-127                | -1.66 | 1.39 | Gms |
| US-127A               | -1.02 | 2.23 | Gms |
| US-128                | -1.72 | 1.91 | Gms |
| IM-NL1-02             | -0.5  | 2.49 | Gms |
| IM-NL1-03             | 1.25  | 2.1  | Gms |
| IM-NL1-04             | 2.99  | 0.89 | fM  |
| IM-NL1-05             | 2.64  | 1.20 | fM  |
| <b>Somma-Vesuvius</b> |       |      |     |
| AC3_96-02             | 2.37  | 1.26 | mM  |
| AC3-98                | 2.48  | 1.2  | mM  |
| AC_BON                | 3.52  | 0.38 | mM  |
| T123-02               | 1.37  | 1.5  | mM  |

574

575 Tab. 3. Statistical parameters (mean and sorting) extracted from the grain-size analyses, and reference lithofacies (see  
576 Tab. 2 for descriptions).

577

578 Field observations and grain-size analyses, highlight significant differences between the sectors of  
579 Lauro Valley, Avella-Baiano Valley, and Somma-Vesuvius. A common feature between the three  
580 sectors is that the lahar deposit samples are mostly massive, poorly-sorted and polymodal; only a few  
581 samples are moderately-sorted and unimodal (sorting <1.5 phi). On the other hand, the grain-size  
582 modes found show some interesting differences (in Fig. 12 the cumulative curves are shown). The  
583 coarse modes for Lauro Valley and Avella-Baiano Valley span from fine/medium lapilli to coarse  
584 ash, while for Somma-Vesuvius span from coarse to fine ash. The medium modes for Lauro Valley  
585 and Avella-Baiano Valley span from coarse to medium ash, while for Somma-Vesuvius span from  
586 medium to fine ash. The fine modes for Lauro Valley and Avella-Baiano Valley, and for Somma-  
587 Vesuvius span from medium to fine ash. All these differences basically depend on the origin of the  
588 primary pyroclastic deposits, fallout vs. pyroclastic currents, which were remobilized from different  
589 sectors, Apennines and Somma-Vesuvius. The grain-size analysis is used as an input information for

590 the lahar transport model (de' Michieli Vitturi et al., this issue) aimed at assessing the related hazard  
591 (Sandri et al., this issue).

592

#### 593 **4.2. Magnetic results**

594 Both Acerra (12 km from Somma-Vesuvius) and Nola (10-15 km from Apennine source valleys)  
595 localities show a well-defined magnetic fabric for the Pollena syn-eruptive lahar deposits. Principal  
596 susceptibility axes ( $K_1 \geq K_2 \geq K_3$ ) are clustered. Magnetic lineation ( $K_1$ ) and magnetic foliation ( $K_3$ ,  
597 pole of the plane) are mostly sub-horizontal or gently emblicated. The anisotropy degree P ( $K_1/K_3$ )  
598 is mostly lower than 1.060, but can reach high values like 1.200. At Acerra, the magnetic foliation is  
599 always dominant, and the fabric is oblate. The Pj is linearly correlated to the mean susceptibility ( $k_m$ ).  
600 In Appendix B, the full nomenclature is defined for completeness. The magnetic fabric has a  
601 horizontal magnetic foliation and a clustered magnetic lineation, whose mean direction is NE-SW.  
602 Considering the chaotic nature of the lahar deposits, the high Pj and the clustered susceptibility axes  
603 can highlight a channelized flow (Fig. 13). At Nola instead, the fabric is both prolate/oblate, and Pj  
604 is lower than 1.040. The susceptibility axes are more dispersed than at Acerra, but mean magnetic  
605 lineation clearly shows a NW-SE direction. If one considers the oblate specimens only, the magnetic  
606 foliation is sub-horizontal, on the contrary, the magnetic foliation of the prolate specimens is steeply  
607 dipping ( $65^\circ$ ) toward SE. At Nola, the flow direction inferred by AMS is consistent and parallel to  
608 the invasion basin.



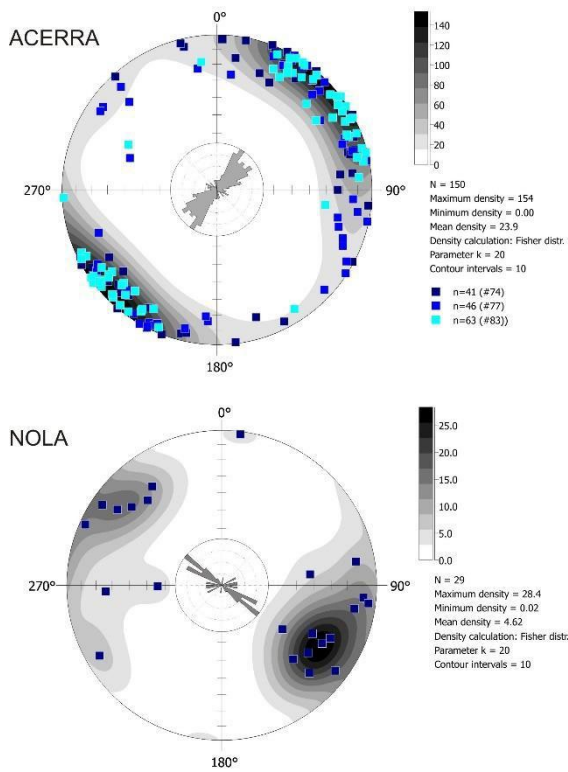

609

610 Fig. 13. Equal area projection and Rose diagram of the  $K_1$  directions at Acerra (12 km from Somma-Vesuvius) and Nola  
 611 (10-15 km from Apennine source valleys).

612

613 At Acerra, the  $T_{dep}$  interval is 120-140 °C, while for Nola  $T_{dep}$  is lower than 120 °C (Fig. 14). In the  
 614 Nola case, a low temperature magnetization component lower than 120 °C cannot be directly  
 615 considered as a TRM. In fact, the low  $T_b$  Earth's field component of magnetization can also be  
 616 produced by a viscous remanent magnetization (VRM), acquired during exposure to weak fields  
 617 (Bardot and McClelland, 2000). The acquisition of the VRM depends on the duration of the exposure.  
 618 For age around that of the Pollena eruption, the minimum  $T_{dep}$  which can be distinguished is ca. 120  
 619 °C. For this reason, we considered the Nola lahar to be emplaced at low temperature.

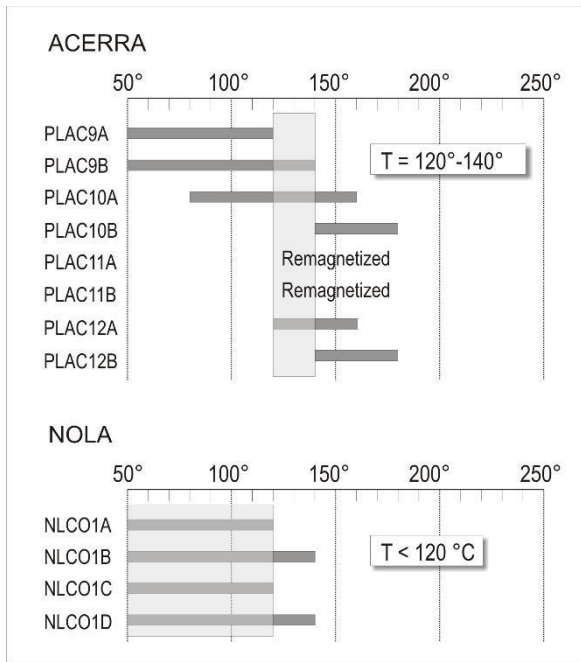

620

621 Fig. 14. Deposition temperature at Acerra and Nola. The site  $T_{dep}$  is estimated from the overlapping reheating temperature  
 622 ranges for all lithic clasts sampled.

623

624 The mean paleomagnetic direction for each locality, calculated using Fisher's statistics, is well-  
 625 defined, and its directional value and confidence limits do not overlap (Fig. 15). Thus, the two  
 626 directions are statistically distinguishable at the 95% confidence limits. Since a paleomagnetic  
 627 direction is a record of the Earth's magnetic field acting during the emplacement, it follows that the  
 628 lahar deposits at the two localities are not synchronous.

629 Overall, all magnetic measurements just discussed show distinctly different characters between  
 630 Acerra and Nola, clearly indicating two distinct events of emplacement.

631

632

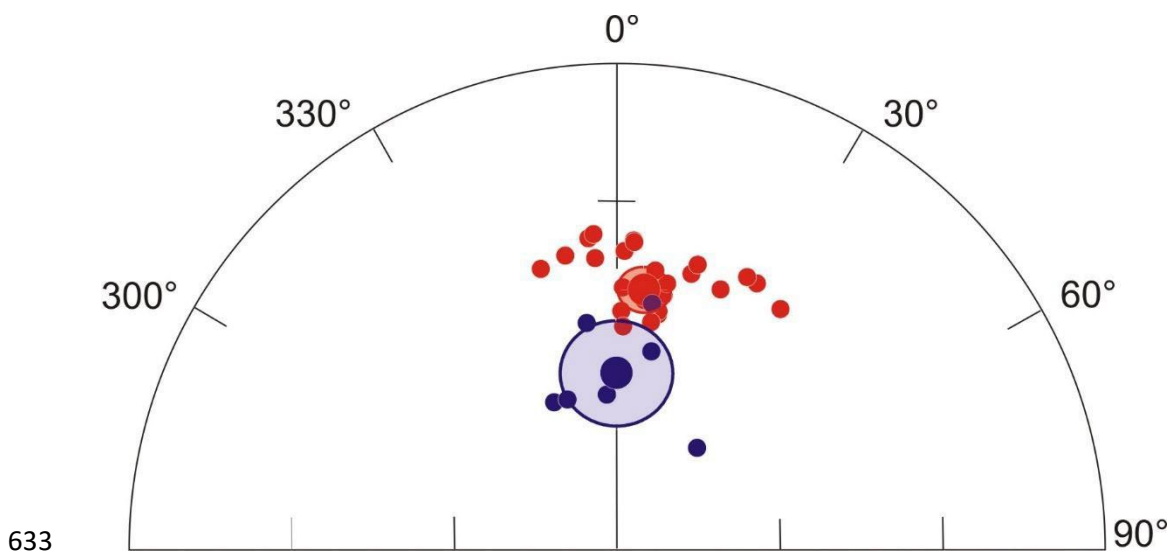

634 Fig. 15. Equal-area projection of the characteristic remanent magnetization directions, and their mean value with  
 635 associated confidence limit, from Acerra (red dots, mean value:  $n=26$   $D=7.5^\circ$ ,  $I=43.4^\circ$ ,  $\alpha_{95}=3.5^\circ$ ), and Nola (blue  
 636 dots, mean value:  $n=7$ ,  $D=0.8^\circ$ ,  $I=60.2^\circ$ ,  $\alpha_{95}=9.0^\circ$ ).

637

### 638 4.3. Lahar dynamics

639 By inverting the field evidence and data, it is possible to reconstruct the macroscopic flow dynamics  
 640 that occurred in the lahar invasion, which are particularly interesting to understand the impact that  
 641 those lahars had on the Vesuvius territory. As already described, the lahar deposits show thicknesses  
 642 that are variable from several centimeters to a few meters, and this can depend on multiple local  
 643 factors: i) topography; ii) distance from source; iii) erosion; iv) source area and type of remobilized  
 644 sediment (variably sized fallout vs. flow deposits). In particular, thicker deposits are found near the  
 645 mouth of the valleys and in the flat alluvial plain, as shown in the deposit distribution maps. On the  
 646 other hand, the deposits show a general tabular-like shape (Fig. 7), with an average thickness of the  
 647 order of 0.5-1 m recurrent for several studied sites, which is the first evidence of the lahars impact  
 648 and mass flow emplacement in the area. In terms of runout distance, the lahars travelled for 10 to 15  
 649 km from sources (Somma-Vesuvius and Apennine detachment areas), based on the geospatial  
 650 database that includes all studied sites. It was possible to infer the source areas based on the common  
 651 sedimentological features of the lahar deposits between nearby sites. On the other hand, distant sites

652 with sedimentologically different deposits were fed from different source areas. These important  
653 constraints are used to validate and inform lahar numerical models (de' Michieli Vitturi et al., this  
654 issue) and simulations (Sandri et al., this issue) using a shallow layer approach for hazard assessment.  
655 We cannot rule out that lahar pulses from different source areas (Somma-Vesuvius vs. Apennines)  
656 might have overlapped and further aggraded in the open plain.

657 At several locations, we found erosional unconformities (Fig. 16a) between the lower and upper flow  
658 units (Fig. 16b), as well as between the pyroclastic and lahar deposits. Erosion is an important factor  
659 for the entrainment of pre-existing materials and objects, which include large-size clasts external to  
660 the remobilized pyroclastic material. Size and density of the largest clasts embedded in the deposits  
661 can give an idea of the carrying capacity of the lahars.

662

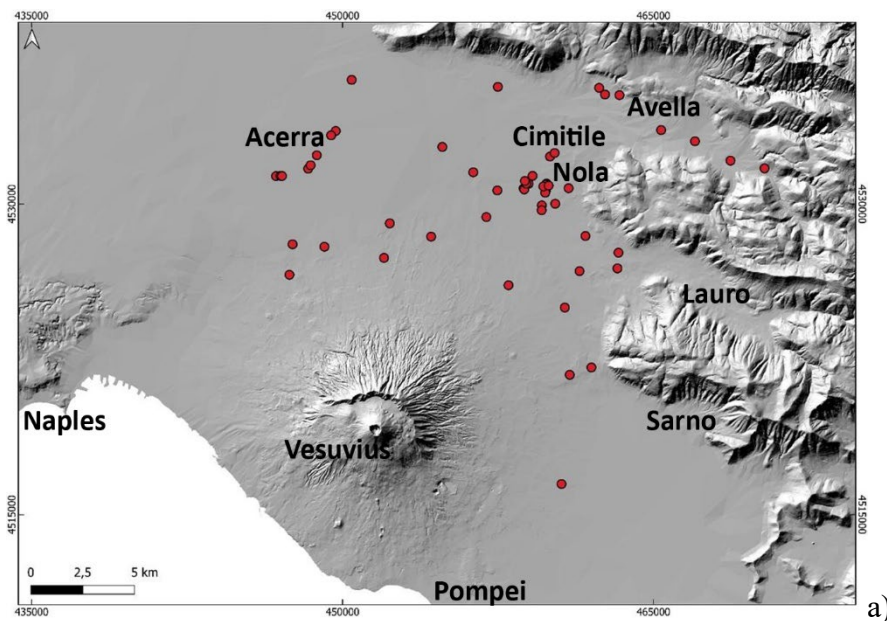

663

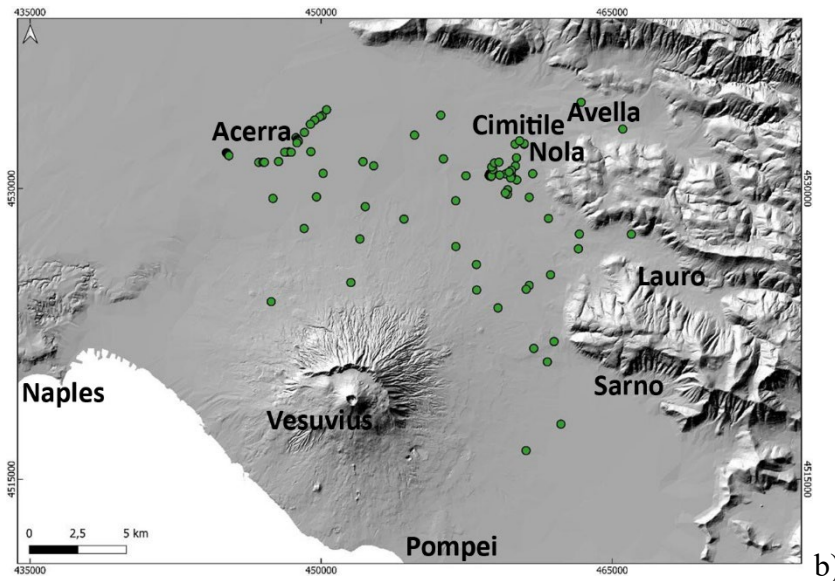

664

665

666

667

668

669

670

671

672

673

674

675

676

677

678

679

680

681

682

Fig. 16. a) Sites with evident erosion traces at the base of the lahar units; b) Sites in which multiple depositional flow units are vertically identified. Both evidences corroborate the interpretation of the depositional mechanisms, as well as constrain the choice of the shallow layer approach for the lahar models and simulations (de'Michieli Vitturi et al., this issue; Sandri et al., this issue).

Occurrences of large clasts and boulders are reported in the area invaded both by the syn- and post-eruptive lahars, with a distribution that follows the one of the lahar deposits, in particular both are found at the mouth of the valleys and in the alluvial plain. The presence of the erosional features (Fig. 16a), and the fact that the deposits are mostly composed of massive and relatively thick units (Fig. 16b), suggest that high sediment transport and deposition both occurred in the same area (Doronzo and Dellino, 2013; Roche, 2015). Such occurrences of erosion and accumulation of multiple units were useful to inform the lahar modelling of de'Michieli Vitturi et al. (this issue).

We calculated local velocities of the syn- and post-eruptive Pollena lahars based on the biggest clasts that are found in the deposits at various stratigraphic heights, with boulder dimensions from several centimeters to a meter, and for flow density  $\geq$  water density (Appendix A). The faster the lahar the higher the capability of its flow to entrain bigger external clasts. This occurred at locations where such clasts were freely available on the substrate, or where the lahars impacted and damaged anthropogenic structures.

683

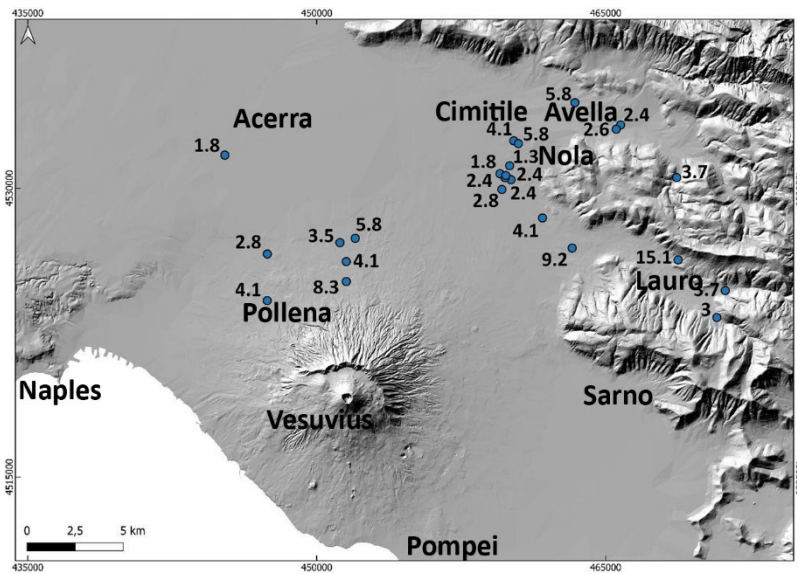

684

685 Fig. 17. Average lahar velocities (in m/s) estimated with a point-by-point reverse engineering approach.

686

687 Then, we used the flow velocities (Fig. 17) to calculate local dynamic pressures of the lahars (Fig.  
688 18) as a function of the clast properties (size, density and shape). The obtained estimations are used  
689 by Sandri et al. (this issue) to validate the probabilistic hazard assessment of lahars from Vesuvius  
690 eruptions.

691

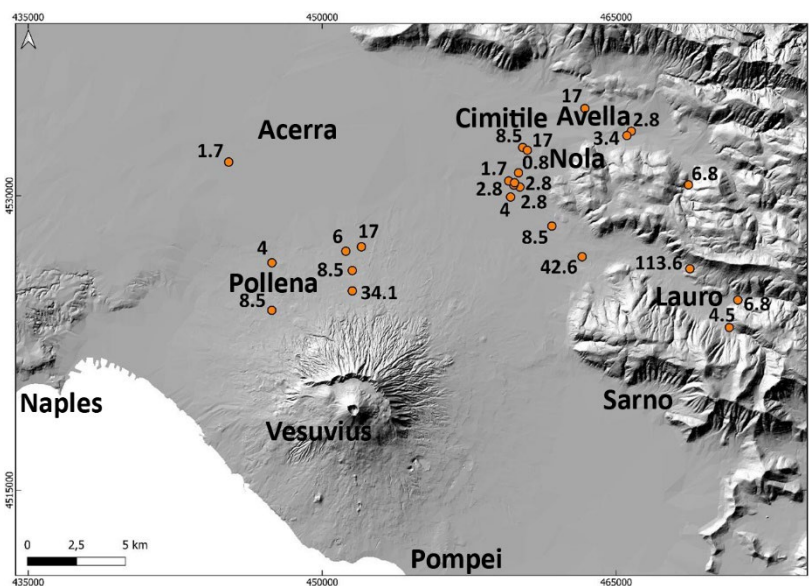

692

693 Fig. 18. Average lahar dynamic pressures (in kPa) estimated with a point-by-point reverse engineering approach.

694

695 The data presented in Figs. 17 and 18 represent minimum local values of the flow velocity and  
696 dynamic pressure, respectively, useful to assess some minimum impact of the lahars in the alluvial  
697 plain. An approximation of this point-by-point approach is that the values were calculated for the  
698 finding locations of the clasts in the deposits, meaning that the values are overestimated for those  
699 exact locations, while they should more properly be referred to the immediate surroundings upstream.  
700 We did a parametric test to quantify the sensitivity for different physical states of the multiphase flow  
701 depending on initial fluidization and flow density, and considering two end members, from a non-  
702 fluidized case to an initially fluidized and non-expanded case (see Appendix A; Roche et al., 2013).  
703 From the performed analysis, we found that the most typical values are referred to the initially  
704 fluidized and slightly expanded case (that is a few % more expanded than the non-expanded case),  
705 with most of the points falling in the range of velocity of 2-4 m/s, and dynamic pressure of 4-8 kPa.  
706 Lastly, in eight locations we found the lahar deposits emplaced against meter-sized obstacles, from  
707 which we estimated, by comparison, local flow heights of the order of 1-1.5 m, and particle volumetric  
708 concentrations of ~30% or more, i.e. the deposit thickness is ~1/3 of the lahar thickness (cf. Capra et  
709 al., 2018).

710

## 711 **5. Discussion**

712 The historical sources used as benchmark for lahars around Somma-Vesuvius and in the Apennine  
713 valleys remark the frequent and broad impact that explosive eruptions of Vesuvius had in historical  
714 times. Some of the eruptions in the last four centuries (e.g., 1631, 1822, 1906 and 1944) impacted on  
715 a number of municipalities, particularly during the sub-Plinian eruption of 1631. Heavy rain events  
716 caused remobilization of the primary pyroclastic deposits, triggering multiple lahars during or  
717 immediately after the eruption up to a few years (syn-eruptive lahars; Sulpizio et al., 2006); post-  
718 eruptive lahars were triggered on the longer term.

719 On the other hand, the Pollena eruption had an even wider impact, both in terms of primary pyroclastic  
720 deposition and secondary (lahar) impact. For this event, the historical sources are scarce to absent.  
721 The analysis of – and realization of a database with – more than 500 stratigraphic sections were done,  
722 which also includes the sedimentological features of the lahars deposits relative to the two sub-Plinian  
723 Vesuvius eruption case-studies, Pollena and 1631. The detailed reconstruction and mapping of the  
724 primary deposits allowed to update the area affected by pyroclasts dispersal, and it was found that  
725 both eruptions had an impact larger than previously known. In particular, the stratigraphic and  
726 sedimentological reconstruction of the deposits was done not only in the countryside but also close  
727 to urban areas, and this is important in terms of local impact of the lahars in the environment.  
728 Specifically, such impact investigation was done in urban areas including archaeological findings  
729 (e.g., urban structures, walls, etc...).

730 These findings include not only new data from the Somma-Vesuvius plain, but also more distal data  
731 from Lauro Valley and Avella-Baiano Valley (Apennines), which were subjected to heavy  
732 remobilization of the primary deposits including the widely-dispersed fine ash deposits formed in the  
733 late stage of the eruptions. Indeed, the accumulation areas that were reconstructed reveal an  
734 enlargement and extra 47% (Pollena eruption) and 230% (1631 eruption) coverage that was not  
735 previously known, and this should be considered in the hazard and impact evaluation in the  
736 Campanian plain and on the nearby Apennine reliefs. The full database allows a more precise  
737 reconstruction of the new isopachs, both for the Pollena and 1631 eruptions, which is possible given  
738 the high number of data points in the study area.

739 With particular reference to the lahar deposits, the syn-eruptive ones occurred by relatively short-  
740 term (during or immediately after the eruption) events, and were directly emplaced on the primary  
741 pyroclastic deposits, both for the Pollena and 1631 eruptions. Also, there are not any significant  
742 erosion surfaces nor humification traces in the sequences due to prolonged exposure of the primary  
743 deposits, testifying that the secondary emplacement was quite immediate (max a few years; Sulpizio  
744 et al., 2006) after or even during the eruption. The syn-eruptive features are also testified by the



745 absence of anthropogenic traces or humified surfaces at the base of or interbedded in the lahar  
746 deposits, as further evidence of a very short-term time span between the eruptions and the lahar  
747 events. Another interesting feature is the presence of multiple depositional flow units, as evidenced  
748 by grain-size changes, some clast alignments and concave erosion surfaces in the lahar deposits. Such  
749 depositional units were formed by en-masse emplacement (with reference to single flow pulse), while  
750 the whole lahar deposits were formed by rapid progressive aggradation of the various flow units  
751 (Vallance and Scott, 1997; Doronzo, 2012; Roche, 2012; Smith et al., 2018; Martí et al., 2019;  
752 Guzman et al., 2020; see also Sulpizio et al., 2014, p. 56), which does not contradict the principle of  
753 superposition. This can be argued by the generally massive facies of each flow unit in the deposits,  
754 and by the presence of water escape structures that cross vertically the entire deposits sequences. The  
755 latter evidence testifies a rapid water loss through vertical escaping “pipes” during or soon after the  
756 aggradation of the sequences. In other words, the various flow units (layers) must decouple from the  
757 transport system, and such decoupling occurs unit-by-unit and not particle-by-particle (Sulpizio et  
758 al., 2006, 2014; Roche, 2012; Doronzo and Dellino, 2013; Breard and Lube, 2017; Smith et al., 2018),  
759 through a massive accumulation rate (Duller et al., 2008; Doronzo et al., 2012; Martí et al., 2019).

760 The analysis of the Pollena lahar lithofacies allowed the identification of two main deposit categories.  
761 The first one occurs on an area that extends for more than 10 km north of Mount Somma, and the  
762 second one occurs on an area that extends west of the Apennines. For the latter, we can recognize two  
763 significant sub-categories of deposits, corresponding to the main valleys in northwest-southeast  
764 direction, Avella-Baiano Valley and Lauro Valley. The difference between the first and the second  
765 deposit categories seems to reflect the type of primary deposits that were remobilized (fine ash vs.  
766 ash and lapilli). In the area north of Mount Somma, which also comprises the municipalities of Acerra  
767 and Afragola (about 12 km from Somma-Vesuvius), the primary lapilli fallout deposits are absent. In  
768 this part of the plain, the thin layer of phreatomagmatic ash is widely present, while thick fine-grained  
769 pyroclastic current deposits are present in the Mount Somma valleys that fed some of the lahars. In

770 Avella-Baiano Valley and Lauro Valley, which also comprise the municipalities around Nola at 10-  
771 15 km from Apennine source valleys(Fig. 1 and Appendix C), the lahar deposits are generally coarser,  
772 and consist of multiple depositional units with different lithofacies (Tab. 3). In this case, both grain-  
773 size and componentry indicate that lahar deposits resulted from the remobilization of the fallout  
774 deposits. Such considerations also derive from the full compilation of the geospatial database. A  
775 volume estimation of the remobilized syn-eruptive deposits, based on a QGIS calculation, is of  $7 \times 10^7$   
776  $\text{m}^3$  for the northern Vesuvius area, and  $4 \times 10^7 \text{ m}^3$  for the Lauro Valley.

777 Referring to the 1631 eruption, previous maps have shown the distribution of the 1631 lahar deposits  
778 toward east, basically following the distribution of the primary pyroclastic fall deposits (Sulpizio et  
779 al., 2006), while in Figs. 10 and 11 we show a significantly larger distribution area particularly toward  
780 the north (Somma-Vesuvius ramps and plain) and east (Apennines valleys), and less toward the  
781 southeast. In particular, this distribution is well explained by the wide distribution of the ash fallout  
782 deposit toward both north and northeast (Fig. 6), remobilized during the lahar generation both from  
783 the Mount Somma and Apennine slopes. On the other hand, looking at the average deposit  
784 thicknesses, they reach half a meter in the north and northeast, while reach a couple of meters in some  
785 locations in the northeast (aligned with the dispersion axis of the primary fallout deposits and out of  
786 the Apennine valleys).

787 The sedimentological analyses carried out on a number of samples from the different studied sectors  
788 (Somma-Vesuvius, Lauro Valley, Avella-Baiano Valley) are useful for discriminating the various  
789 factors that contributed to the initiation of the lahars and emplacement of their deposits. The samples  
790 from Lauro Valley and Avella-Baiano Valley are coarser (but have a significant finer tail) than the  
791 ones for Somma-Vesuvius, and this can depend on three factors: i) genetic types of the primary  
792 pyroclastic deposits (fall vs. flow); ii) interaction between lahars and morphology (valley vs. plain);  
793 iii) major remobilization in Lauro Valley and Avella-Baiano Valley of the distal phreatomagmatic  
794 fine ash deposits formed in the late eruption stages. In other words, the primary grain sizes involved

795 in the remobilization (finer and higher-water retention for Somma-Vesuvius), as well as the general  
796 topography (gentler but longer ramp for Somma-Vesuvius) likely acted as the main factors directly  
797 impacting the distribution of the lahar deposits, and the decay of the flow velocities and dynamic  
798 pressures in the area.

799 Interestingly, an emplacement temperature of  $\sim 120$  °C of the lahar deposits was calculated for those  
800 generated along the Somma-Vesuvius slopes, indicating a relatively hot provenance after  
801 remobilization of the pyroclastic current deposits. Instead, the remobilization from the Apennines  
802 sectors involved only cold fallout deposits. The companion paper of de' Michieli Vitturi et al. (this  
803 issue) investigates also the nexus between water temperature, flow viscosity, and their consequential  
804 impact on fluid dynamics. Specifically, when the dominance of frictional forces is attributable to the  
805 yield slope term, the initial divergence between high- and low-temperature scenarios appears  
806 negligible. However, discernible dissimilarity appears over time for the inundation area of the colder  
807 flow case (i.e., 27 °C) with respect to the warmer counterpart (i.e., 100 °C), the latter case being close  
808 to the 120 °C one reported from paleomagnetism. Remarkably, the temperature-induced variations  
809 assume a pivotal role in shaping the dynamic characteristics of the hotter flow. The diminished  
810 viscosity associated with elevated temperatures not only amplifies fluid mobility but also prompts a  
811 notable acceleration in sediment settling velocity. This, in turn, initiates a debulking mechanism,  
812 thereby intensifying overall flow mobility. Consequently, this intricate interplay contributes to a  
813 reduced footprint of deposited material from the flow, altering the spatial distribution of sediments.  
814 However, the overall impact on the inundation area is typically quite reduced, being typically less  
815 than 10-20% even considering a thickness threshold of 1 mm (see de' Michieli Vitturi et al., this issue).  
816 The sampled clasts might have been incorporated multiple times by the flows, and the heating/cooling  
817 processes that we interpret as indicating  $T_{\text{dep}}$  in the diagrams are the last to have occurred and affected  
818 the samples. Besides, a third heating component is clearly observed for some of them. The  
819 paleomagnetic directions are statistically distinguishable, supporting that the lahar emplacement at

820 Nola (10-15 km from Apennine source valleys) and Acerra (12 km from Somma-Vesuvius) was not  
821 synchronous, as further evidence of the different timing hence likely different detachment areas  
822 involved during the pyroclasts remobilization. However, the comparison with the paleosecular  
823 variation curves of the Earth's magnetic field does not allow to better constrain the entity of the time  
824 span between the two lahar events. The parental lahars acted as mass flows capable of entraining  
825 outsized clasts (where available) from substrate under the action of shallow-layer flow velocity and  
826 dynamic pressure (de' Michieli Vitturi et al., this issue), then emplaced massive flow units with  
827 uplifted external clasts set into the much finer matrix (see Roche, 2015). In some lahar units, various  
828 clasts have been found, showing some alignment that depends on the mechanisms of entrainment and  
829 uplift (with respect to substrate) within the flow.

830 In terms of local impact in the Pollena case study (the largest one), while most of the calculated points  
831 (44) fall in the range of lahar velocity of 2-4 m/s and dynamic pressure of 4-8 kPa, a few peak values  
832 of velocity of 13-15 m/s and dynamic pressure of 90-115 kPa are also calculated, which are directly  
833 related to meter-sized clasts entrained into the lahars on the steep slopes, then deposited downstream  
834 of alluvial fans. Such values of the velocity and dynamic pressure are well comparable with those  
835 calculated for lahars that occurred recently at Ruapehu in 2007 (Lube et al., 2012) and Merapi in 2011  
836 (Jenkins et al., 2015), and in historical times at El Misti (Thouret et al., 2022). In particular, the  
837 estimated velocities and pressure agree with those of Lube et al. (2012) and Jenkins et al. (2015).  
838 Moreover, multiplying velocity and density gives a power per unit surface, so those most  
839 representative values correspond to a flow power per unit surface of  $8 \cdot 10^3 - 3.2 \cdot 10^4 \text{ W/m}^2$ , with peak  
840 values of  $1.17 \cdot 10^6 - 1.72 \cdot 10^6 \text{ W/m}^2$ , in agreement with typical values reported for floods and  
841 megafloods (Russell and Knudsen, 1999; Whipple et al., 2000; Carling, 2013).

842

## 843 **6. Conclusions**

844 The integration of the historical, stratigraphic, sedimentological, laboratory, and impact parameter  
845 analyses carried out in the Vesuvius area allow us updating on the lahar invasion related to the Pollena  
846 and 1631 eruptions. In general, the physical characteristics of the analyzed deposits indicate that syn-  
847 eruptive lahars are related to the rapid remobilization of large volumes of pyroclastic material, which  
848 is mainly fine-grained and almost exclusively derived from the accumulation of products related to a  
849 single eruption. The analysis also shows that tardive (post-eruptive) mass flows are common, and  
850 involve multiple and variably altered deposits, and that their energy and frequency are progressively  
851 lower over time, after the last eruption has occurred. In particular, a higher impact both from primary  
852 and secondary phenomena is something that should be accounted in the Vesuvius area and that:

- 853 i) The new isopach maps of the Pollena and 1631 eruptions allow us to infer a larger impact  
854 than previously known for these two sub-Plinian events of the Vesuvius. Thus, it is worth  
855 reconsidering the territorial impact that sub-Plinian eruptions can have in the Vesuvius  
856 (but not only) area. In particular, the ash deposits can have a high impact in relation to  
857 their high density and low permeability.
- 858 ii) The primary impact from fallout and pyroclastic current processes in the Vesuvius area  
859 was - and may be in the future – followed by the secondary impact from lahars generated  
860 during or immediately after the eruption events. Both impacts can have a wide distribution,  
861 because they are directly controlled by the primary deposits distributions, both around  
862 Somma-Vesuvius and in the Apennines valleys.
- 863 iii) The runouts of such lahars were significant both for the Pollena and 1631 eruptions, by  
864 reaching distances of 10 to 15 km from the sources, and their deposits geometry is tabular-  
865 like with average thicknesses of 0.5 to 1 m.
- 866 iv) The paleotemperature data highlight a relatively hot dynamics (~120 °C) for those lahar  
867 flow pulses that traveled down the Somma-Vesuvius slopes because of pyroclastic current

868 deposit remobilization. This did not occur from the Apennines sectors, where pyroclastic  
869 currents did not get to, and only cold fallout deposits were remobilized.

870 v) A reverse engineering approach allowed to calculate the local lahar velocities (2-4 m/s,  
871 with peaks of 13-15 m/s), dynamic pressures (4-8 kPa, with peaks of 90-115 kPa), and  
872 solid volumetric concentration (~30%, implying a 1:3 ratio between deposit and flow  
873 thickness), on the basis of the external clast properties entrained into the flows then  
874 emplaced into the ash matrix, and on the presence of the lahar deposits in proximity of  
875 obstacles and archaeological findings.

876 As a general conclusion, we have demonstrated that the areal impact of both primary deposits and  
877 lahars, in case of sub-Plinian events at Somma-Vesuvius, involves a territory wider than  
878 previously known and for several years, with possible decreasing damages over time.

879

## 880 **Appendix A. Calculation of lahar velocities and dynamic pressures**

881 A theoretical scheme is presented to quantify local velocities and dynamic pressures of the lahars, by  
882 inverting the field features at selected locations. The final goal is to map the values of velocity and  
883 dynamic pressure to assessing the hazard from lahars in the study area. Flow dynamic pressure,  $P_{dyn}$ ,  
884 results from a combination of flow density,  $\rho_f$ , and flow velocity,  $v$ , and is defined as follows

$$885 \quad P_{dyn} = 0.5\rho_f v^2 \quad (A1)$$

886 In the study area, the original flow was a multiphase flow of water + pyroclastic sediment, which  
887 during remobilization evolved into a flow of water + pyroclastic sediment + external clasts.  
888 Generically, flow density results from a combination of particle density,  $\rho_p$ , and water density,  $\rho_w$ ,  
889 through particle volume concentration,  $C$ , and is defined as follows

$$890 \quad \rho_f = \rho_p C + \rho_w (1 - C) \quad (A2)$$

891 In order to define flow velocity, we take into account stratigraphic and sedimentological

892 characteristics of the lahar flow units: i) they are ubiquitously massive, and result from remobilization  
 893 of the primary pyroclastic deposits then emplacement from mass flows; ii) they contain big external  
 894 clasts entrained (by dynamic pressure) and uplifted (also by pore pressure) from substrate into the  
 895 flows. With these field characteristics, flow velocity can be expressed as a combination of entrained  
 896 clast properties and flow density, and is defined as follows (modified after Roche, 2015)

$$897 \quad v = \sqrt{\frac{X\Psi(\rho_c - \rho_w)g}{\gamma\rho_f}} \quad (A3)$$

898 where  $X$  is clast small axis,  $\Psi$  is clast shape factor,  $\rho_c$  is clast density,  $g$  is gravity acceleration and  $\gamma$   
 899 is an empirical constant. Eq. 3 allows quantifying the incipient motion of the big clasts, and gives  
 900 minimum values of flow velocity required to entrain and uplift the clasts from substrate, probably  
 901 more than once, before being emplaced into the lahar deposits by flow velocity drop. Such equation  
 902 has been originally derived in laboratory experiments for a multiphase flow of air + sediment, and is  
 903 highly performing at  $\rho_f \sim 1000 \text{ kg/m}^3$  (hindered settling) for dense pyroclastic currents controlled by  
 904 topography then opened to alluvial plain (Martí et al., 2019), which is a case similar to the lahars in  
 905 the study area. Substituting Eq. 3 into Eq. 1 and simplifying gives

$$906 \quad P_{dyn} = 0.5 \frac{X\Psi(\rho_c - \rho_w)g}{\gamma} \quad (A4)$$

907 For given clast properties, flow dynamic pressure has a unique value, while flow velocity is a function  
 908 of flow density. Indeed, the present scheme is a spot model that basically depends on, and is limited  
 909 to, the finding of big clasts and boulders within the lahar deposits. An approximation is that velocity  
 910 and dynamic pressure are calculated for the locations where the clasts are found in the deposits,  
 911 meaning that the calculated values are overestimated for those exact locations, while they are more  
 912 properly referred to the immediate surroundings upstream.

913 At the selected locations in the study area, we collected the dimensions of the biggest clasts found in  
 914 the lahar deposits, and we characterized lithologically the clasts in the field, to calculate flow dynamic  
 915 pressures using Eq. 4. We used the following values for the various parameters in the calculations:  $\Psi$

916 (ellipsoid) = 0.66;  $\rho_c$  (limestone) = 2500 kg/m<sup>3</sup>;  $\rho_c$  (ceramic) = 2000 kg/m<sup>3</sup>;  $\rho_c$  (brick) = 2000 kg/m<sup>3</sup>;  
 917  $\rho_c$  (tephra) = 1500 kg/m<sup>3</sup>;  $\rho_c$  (lava) = 2500 kg/m<sup>3</sup>;  $\rho_c$  (iron) = 8000 kg/m<sup>3</sup>;  $\rho_w$  = 1000 kg/m<sup>3</sup>;  $g$  = 9.81  
 918 m/s<sup>2</sup>;  $\gamma$  = 0.031 – 0.071. Also, we calculated flow velocities using Eq. 3, in the following range of  
 919 flow density:  $\rho_w \leq \rho_f \leq \rho_p$ , where  $\rho_w$  = 1000 kg/m<sup>3</sup> and  $\rho_p$  = 2000 kg/m<sup>3</sup>. In this way, flow density  
 920 spans from two extreme cases: i)  $\rho_f = \rho_w$ , negligible pyroclastic sediment and external clasts, so water  
 921 flow only; ii)  $\rho_f = \rho_p$ , negligible water and dominant pyroclastic sediment, so ash flow only. For the  
 922 empirical constant in Eq. 3, we used three different values to test the sensitivity with respect to  
 923 different physical states of the multiphase flow:  $\gamma$  (non-fluidized) = 0.031;  $\gamma$  (initially fluidized and  
 924 slightly expanded) = 0.057;  $\gamma$  (initially fluidized and non-expanded) = 0.071 (see Roche et al., 2013;  
 925 Fig. A1).

926 Regarding flow velocity, after calculation we can rewrite Eq. 3 in a simpler form (to more directly  
 927 relate velocity to density) as follows

$$928 \quad v = \frac{a}{\sqrt{\rho_f}} \quad (A5)$$

929 where  $a > 0$  depends on clast properties, and its square has dimension of pressure. On the other hand,  
 930 it is not straightforward to constrain local flow velocities with unique values of flow densities, mostly  
 931 because small variations of velocity correspond to large variations of density, and this is particularly  
 932 valid for volcanoclastic mass flows (Carling, 2013; Jenkins et al., 2015; Roche, 2015; Martí et al.,  
 933 2019; Guzman et al., 2020; Thouret et al., 2022).



934

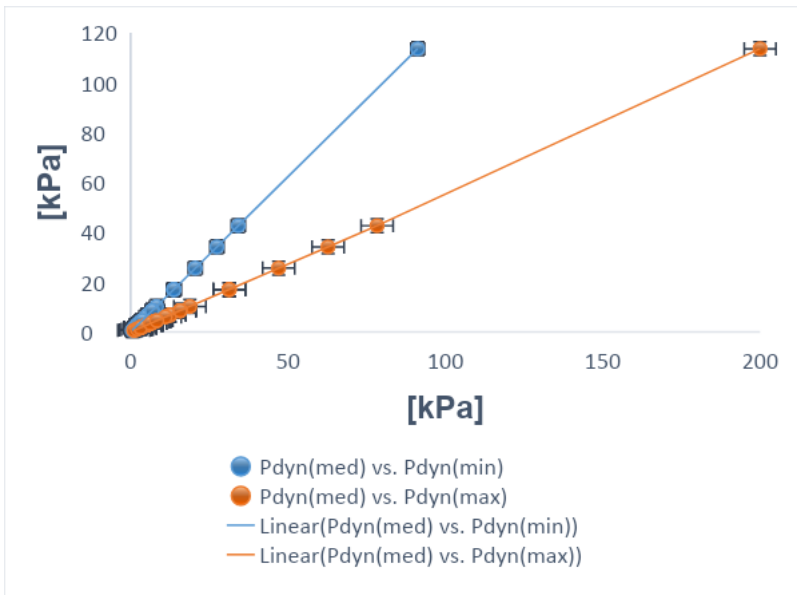

A

935

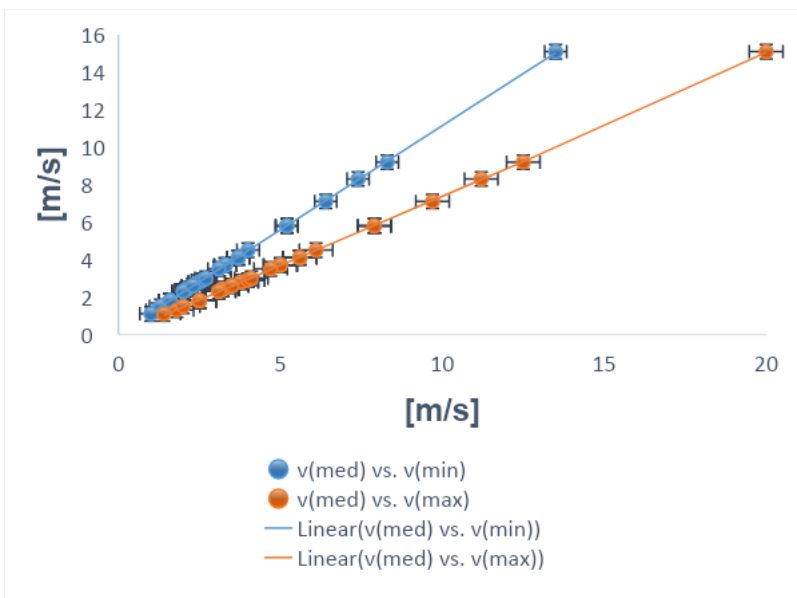

B

936

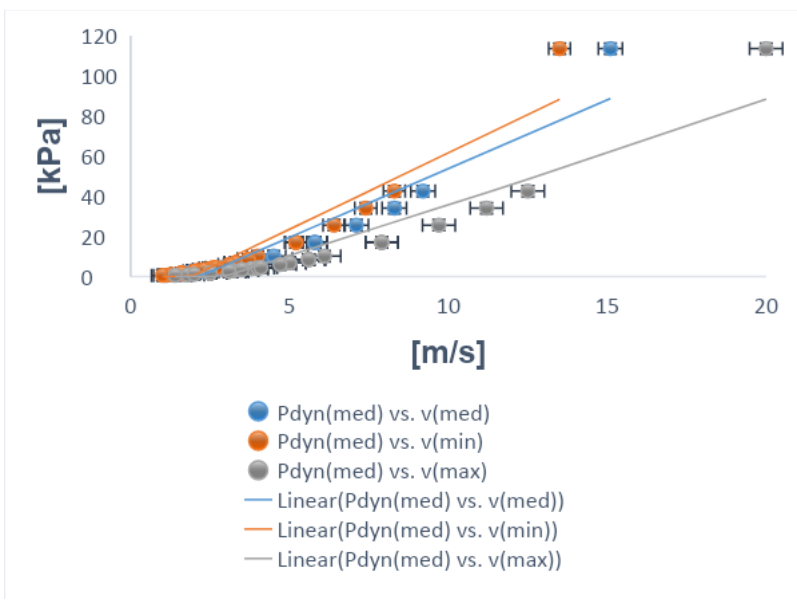

C

937 Fig. A1. Local dynamic pressures and velocities for the syn- and post-eruptive Pollena lahars calculated with the reverse  
 938 engineering approach. **A**, dynamic pressure for the initially-fluidized and slightly expanded case vs. dynamic pressure for  
 939 the initially-fluidized and non-expanded (blue) and non-fluidized (orange) cases; **B**, velocity for the initially-fluidized  
 940 and slightly expanded case vs. velocity for the initially-fluidized and non-expanded (blue) and non-fluidized (orange)  
 941 cases; **C**, dynamic pressure for the initially-fluidized and slightly expanded case vs. velocity for the initially-fluidized and  
 942 slightly expanded (blue), vs. velocity for the initially-fluidized and non-expanded (orange), vs. velocity for the non-  
 943 fluidized (grey) cases.

944

945 At some locations in the study area, we found lahar deposits against meter-scale manufacturing  
 946 obstacles (Di Vito et al., 2009). The peculiarity is that the deposits in proximity of the obstacles are  
 947 thicker than the correlated ones in the free field, but never reach the top of the obstacles themselves.  
 948 This means that the lahars were not much expanded, so unable to overcome the obstacles as stratified  
 949 flows would have done (cf. Spence et al., 2004; Gurioli et al., 2005; Doronzo, 2013; Breard et al.,  
 950 2015). With this field evidence, we can assume that local flow height,  $H$ , was similar to deposit  
 951 thickness against the obstacle,  $h_o$ , as follows

$$952 \quad H \approx h_o \quad (A6)$$

953 In order to estimate flow density using Eq. 2, we focus on particle volumetric concentration. For well-  
 954 sorted deposits, such concentration can be defined with an average value over flow height as follows  
 955 (modified after Doronzo and Dellino, 2013; see also Eq. 30 in de' Michieli Vitturi et al., this issue)

$$956 \quad C = \frac{h_f}{H} \quad (A7)$$

957 where  $h_f$  is deposit thickness in the free field. Substituting Eq. 6 into Eq. 7 gives

$$958 \quad C \approx \frac{h_f}{h_o} \quad (A8)$$

959 In particular,  $h_f$  refers to those lahar deposits relatively close to the obstacles, but which were not  
 960 affected by them during emplacement, i.e. close but not so much. We assessed that correlation taking

961 into account the stratigraphic and sedimentological characteristics of the lahar deposits, and the fact  
962 that Eq. 7 performs better with layers emplaced after remobilization of primary pyroclastic fallout or  
963 dominantly ash flow deposits.

964 Lastly, we macroscopically assessed erosion in the field, by characterizing the unconformities present  
965 both on the primary pyroclastic and lahar deposits. In particular, the syn-eruptive lahar deposits  
966 consist of more than one flow unit, so it is important to understand how the different flow pulses  
967 interacted with each other during emplacement. The main unconformities that are found in the field  
968 are referred to the partial absence of a flow unit, and the loss of lateral continuity despite some flat  
969 geometry of the deposits. On the other hand, at some locations we were not able to assess if erosion  
970 occurred or not due to multiple open issues: i) possible absence of the primary pyroclastic deposits;  
971 ii) possible exclusive presence of the post-eruptive lahar deposits; iii) impossibility to get to some  
972 outcropping deposit base and possible unconformities.

## 973

## 974 **Appendix B. Paleo-temperature and paleo-direction determinations**

975 The magnetic fabric of a deposit was investigated by measurements of the magnetic susceptibility  
976 and its anisotropy (AMS). AMS was measured with a Kappabridge KLY-3 (AGICO), and data were  
977 elaborated by the software Anisoft5 (AGICO). AMS depends on the type, concentration, and  
978 distribution of all the minerals within the specimen. It is geometrically described by a triaxial  
979 ellipsoid, whose axes coincide with the maximum ( $k_1$ ), intermediate ( $k_2$ ) and minimum ( $k_3$ )  
980 susceptibility directions. The magnetic fabric of a specimen is then described by the direction of the  
981  $k_1$  axis, the magnetic lineation (L) and that of the  $k_3$  axis, which is parallel to the pole of the magnetic  
982 foliation plane (F). Besides, the modulus of the susceptibility axes provides some magnetic  
983 parameters useful to express the intensity of the anisotropy ( $P_j$ ) and the oblate/prolate fabric  
984 occurrence (T) (Jelinek, 1981). Generally, sedimentary vs. pyroclastic deposits fabric, here  
985 considered as the proxy of the lahar fabric, is oblate with a horizontal to gently imbricated (less than

986 20°) magnetic foliation. The magnetic lineation is normally clustered along the foliation plunge. In  
987 this case, both the F imbrication and the L direction can provide the local flow direction. Other times,  
988 L is orthogonal to the F plunge or F is statistically horizontal, and it is not possible to infer the flow  
989 direction.

990 For  $T_{\text{dep}}$  estimation, pottery sherds were subjected to progressive thermal demagnetization (PTD),  
991 with heating steps of 40 °C, up to the Curie Temperature ( $T_C$ ), using the Schonstedt furnace and the  
992 spinner magnetometer JR6 (AGICO). The rationale of the method has been described in detail in  
993 several papers (McClelland and Druitt, 1989; Bardot, 2000, Porreca, 2007; Paterson et al., 2010; Lesti  
994 et al., 2011), many of them dedicated to PDCs of the Vesuvius area (Cioni et al., 2004; Di Vito et al.,  
995 2009; Giordano et al., 2018; Zanella et al., 2007; 2018; 2015). Typically, measurements are made on  
996 accidental lava lithics that were entrained during pyroclastic or lahar flows. In this case, we had the  
997 opportunity to estimate the  $T_{\text{dep}}$  by measuring ancient pottery artifacts. Briefly, pottery is  
998 characterized by a thermal remanent magnetization (TRM) acquired during its manufacture and its  
999 subsequent history of daily use. Whenever it is heated, part of its TRM, the one associated with  
1000 blocking temperatures ( $T_b$ ) below the heating one ( $T_h$ ), is overwritten. Without alteration phenomena,  
1001 the heating/cooling is a reversible process, except for the magnetic directions. The original TRM  
1002 shows a random paleomagnetic direction, due to the transport during emplacement. Subsequent  
1003 TRMs show directions parallel to the Earth's magnetic field during their cooling. This is clearly  
1004 illustrated in the Zijderveld diagrams. The composition of the different magnetization components  
1005 reveals thermal intervals characteristic of the heating history of the potsherd. Of course, this  
1006 explanation is simplified, but the method is well-established and has been shown to work well with  
1007 heated artifacts, such in the case of tiles and pottery embedded in the PDC deposits at Pompeii  
1008 (Gurioli et al., 2005; Zanella et al., 2007), Afragola (Di Vito et al., 2009) and Santorini (Tema et al.,  
1009 2015). In case of lahar, we expect low  $T_{\text{dep}}$  or cold deposits. This can be a major concern because of  
1010 the difficulties to distinguish between the TRM secondary components, and the chemical (CRM) and  
1011 viscous (VRM) remanent magnetization. The CRM may develop due to mineralogical changes during

1012 reheating (McClelland, 1996). Instead, VRM is typical of ferromagnetic grains with low  $T_b$  and often  
1013 occurs in most rocks. Following Bardot and McClelland (2000) relationship for time intervals in the  
1014  $10^2$ – $10^6$  year range,  $T_b=75+15 \log$  (acquisition time in years), and using the Pollena eruption date  
1015 (472 CE), we obtain a lower limit of the  $T_b$  around 123 °C. This means that this temperature helps us  
1016 in discriminating between “hot” ( $T_b > 120$  °C) or “cold” lahar ( $T_b < 120$  °C).

1017 Finally, routine magnetic measurements on the lahar matrix were done on the lahar matrix to  
1018 determine the Characteristic Remanent Magnetization (ChRM) by Thermal and Alternating Field  
1019 demagnetizations. The direction of the Earth’s Magnetic Field during the Pollena eruption is well-  
1020 known (Zanella et al., 2008). If the sampled lahars were emplaced shortly after the eruption, both the  
1021 secondary TRMs and the matrix of the lahars should show a remanent magnetization direction similar  
1022 to the Pollena ones. ChRMs can also test if the two lahars (Acerra at 12 km from Somma-Vesuvius,  
1023 and Nola at 10-15 km from Apennine source valleys) are coeval.

1024

## 1025 **Appendix C. Description of the studied areas**

### 1026 *Area 1 – Nola*

1027 In the area surrounding Nola (10-15 km from Apennine source valleys), it is possible to recognize  
1028 the complete fallout sequence of the Pollena eruption (a in Fig. C1 and C2), which usually covers  
1029 ploughed soils (p in Fig C1) and late Roman archaeological remains. The sequence is composed of  
1030 an alternation of coarse pumice and thin ash fallout layers. Its top is always made of a fine ash bed  
1031 related to the phreatomagmatic phase of the eruption (b in Fig. C1 and C2), with a thickness ranging  
1032 from 1 to 14 cm due to erosion. They are almost always overlain by lahar deposits composed of  
1033 several flow units (c in Fig. C1 and C2) with a large thickness variability due to channeling and  
1034 presence of barriers and buildings. They sometimes include blocks, tiles, and other archaeological  
1035 remains.

1036 In Fig. C1, above the primary deposit, there is an example of a well-exposed sequence composed of  
1037 at least five units (c in Fig. C1). The first one is a massive and matrix-supported deposit composed of  
1038 fine and not vesiculated ash (lithofacies Gms), with fragments of greenish to blackish scoriae and  
1039 minor fragments of pumices, lavas and limestones. The fragments are cm-sized and are both angular  
1040 and rounded. The second flow unit is similar to the one below, but is darker and contains less coarse  
1041 fragments. Its matrix is composed of an alternation of fine to medium ash layers. It follows a plane-  
1042 parallel sequence of well-sorted fine sand and silt layers characterized by the lithofacies fM. A  
1043 massive deposit follows upward, it is progressively humified and contains abundant reworked and  
1044 rounded pumice clasts from the Avellino eruption. The top humified surface is almost always eroded  
1045 by anthropogenic activity and is generally ploughed (p1 in Fig. C2). It is overlain by the primary  
1046 deposits of the 1631 eruption (d in Fig. C2). It is few cm thick and is composed of a basal layer of  
1047 dark coarse ash (small pumice fragments), overlain by a massive ash bed, containing abundant  
1048 accretionary lapilli. The following deposit thickens in the ploughing furrows and depressions, and is  
1049 composed of massive fine-ash beds, vesiculated and cohesive, and is interpreted as a lahar deposit  
1050 (lithofacies mM) (e in Fig. C2). This deposit (e in Fig. C3) overlies the foundations of Palazzo Orsini  
1051 (blocks in Fig. C3), now seat of the Court of Nola and built in the second half of the XV century (Fig.  
1052 C3). The top is always eroded by the modern anthropogenic activity, and locally by deposits of recent  
1053 eruptions of Vesuvius (e.g., 1822, 1906).

1054

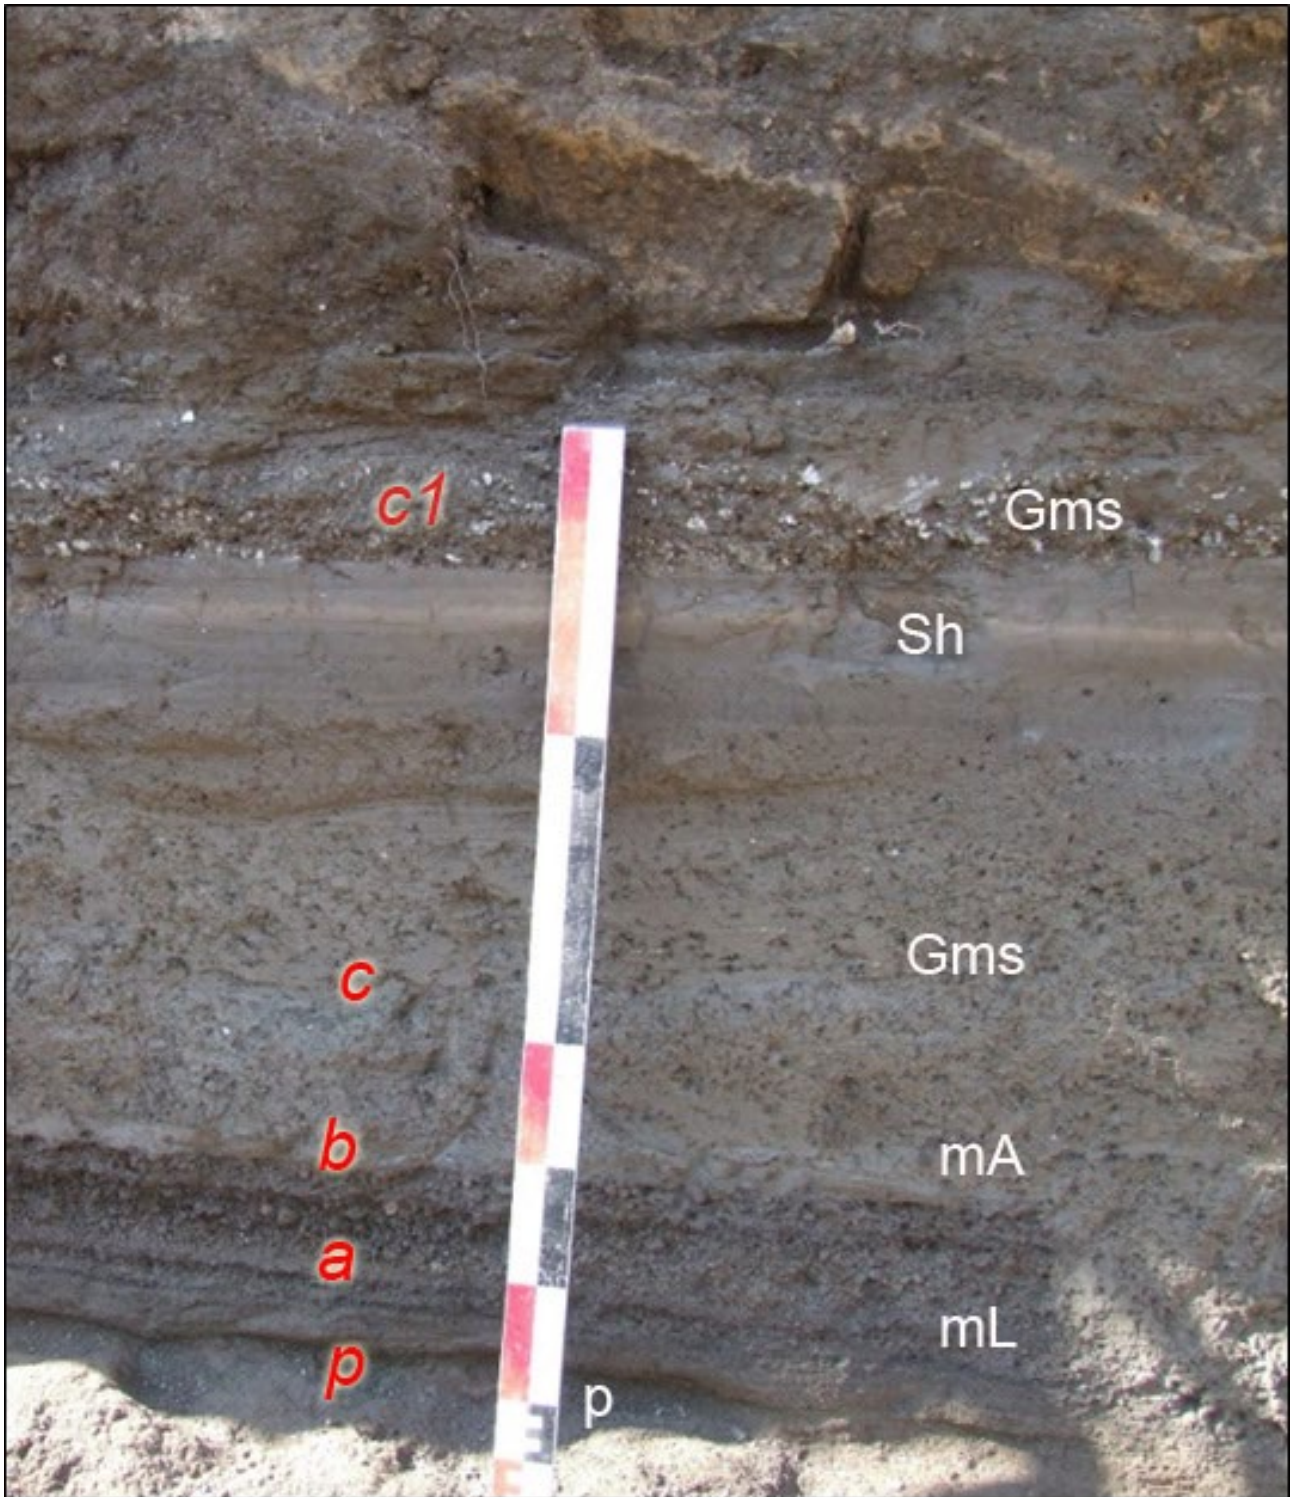

1055

1056 Fig. C1. Nola (10-15 km from Apennine source valleys), Pollena fallout deposits overlain by at least five lahar units. In  
 1057 particular: p = paleosol; a = alternation of coarse and fine fallout sequence of the Pollena eruption; b = final ash fallout  
 1058 of the eruption; c = sequence of syn-eruptive lahars; c1 = post-eruptive lahar containing white pumice fragments of the  
 1059 Pomici di Avellino eruption. For the description of lithofacies see Tab. 2.

1060

1061

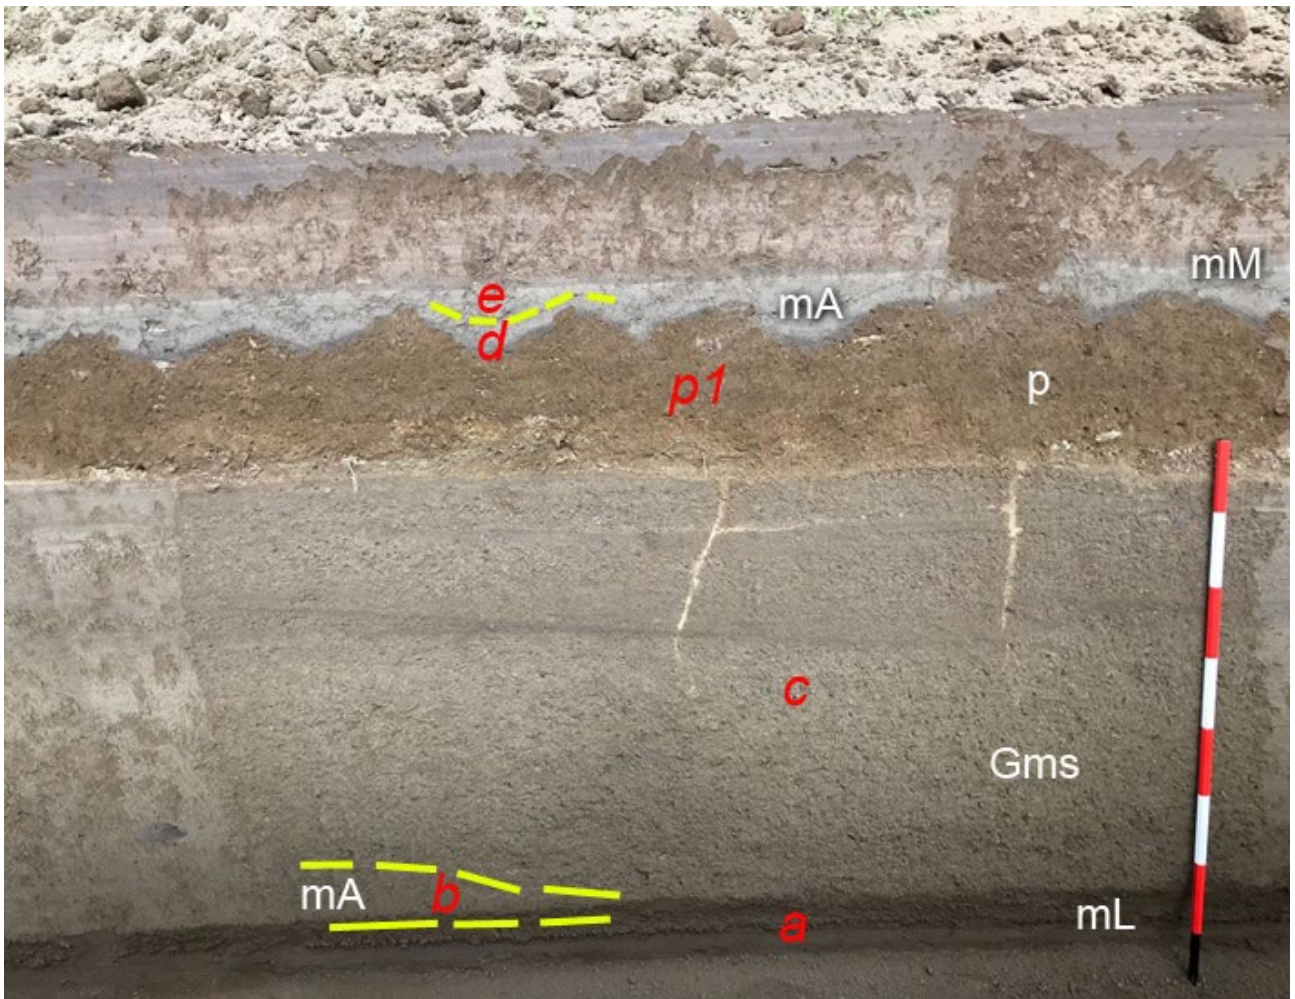

1062

1063 Fig. C2. Nola, Pollena lahar deposits overlain by a cultivated paleosol, and by the 1631 ash fallout and lahars. In particular:  
 1064 a = alternation of coarse and fine fallout sequence of the Pollena eruption; b = final ash fallout of the eruption, partially  
 1065 eroded; c = sequence of three lahar units; p1 = ploughed paleosol; d = 1631 ash fallout deposit mantling the undulated  
 1066 paleosol; e = lahar deposit composed of a massive ash layer. For the description of lithofacies see Tab. 2.

1067

1068



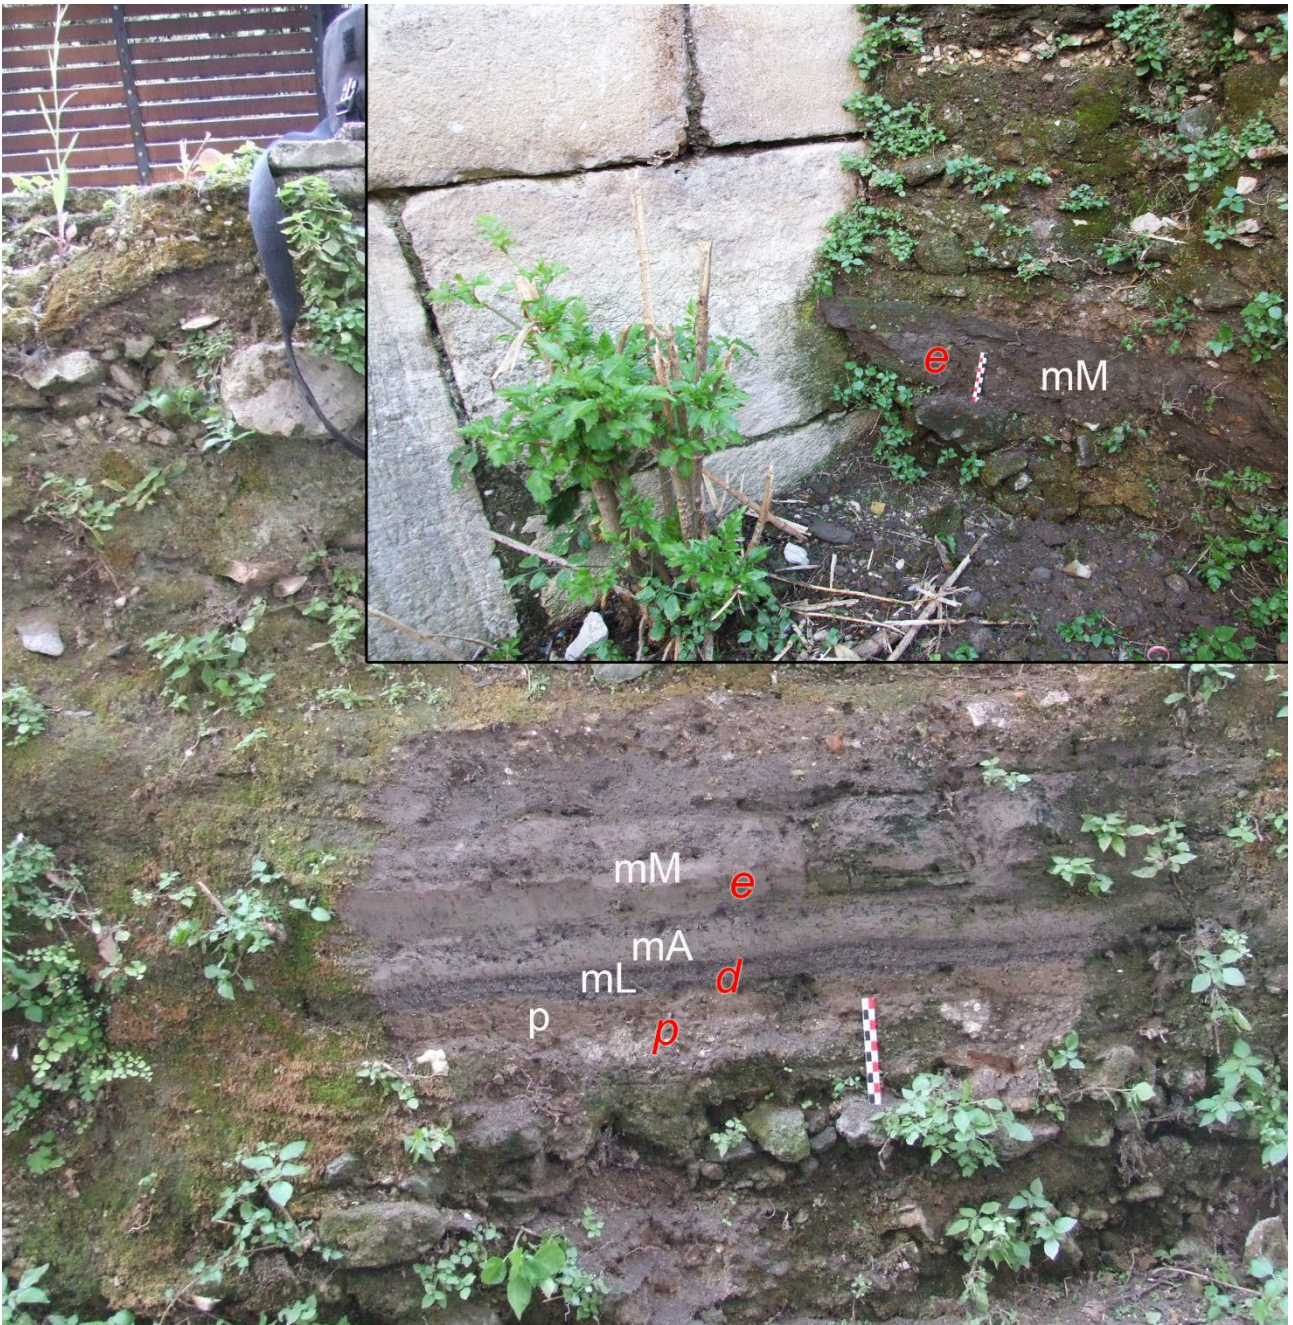

1069

1070 Fig. C3. Palazzo Orsini, Nola (1631 fallout and lahars). In particular: d = 1631 ash fallout deposit overlying the  
 1071 foundations of the building (in the inset); e = syn-eruptive lahar deposit. For the description of lithofacies see Tab. 2.

1072

1073 In Nola and in the nearby Cimitile (about 10-15 km from Apennine source valleys), the effects on the  
 1074 territory of the lahar emplacement related to the Pollena eruption are testified by numerous  
 1075 archaeological remains. The Nola and Cimitile areas are covered by thick sequences of fallout and  
 1076 lahar deposits. In fact, the previous ground level was at least 2-3 m below the present one. This effect  
 1077 is well visible in the Amphitheater Laterizio, which was completely filled by the primary and

1078 secondary deposits, and the same in Cimitile, where in the archaeological site of the Early Christian  
1079 basilicas the present ground level is about two meters higher than the one before the eruption. It is  
1080 worth noting that in Cimitile the flows were able to carry limestone blocks of 50 cm in diameter,  
1081 likely along the main flow direction of the lahars (Fig. C4).  
1082

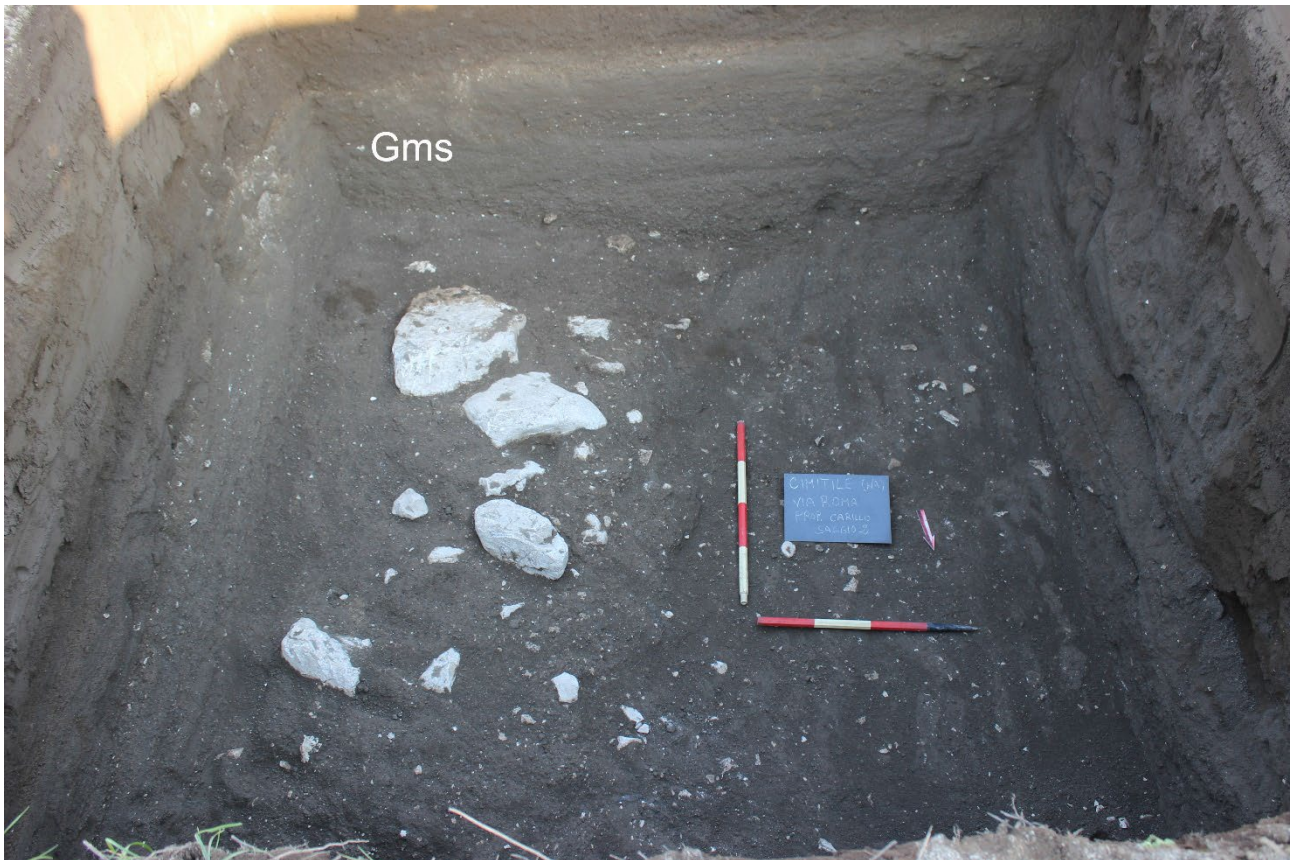

1083  
1084 Fig. C4. Cimitile, sequence of three m-thick syn-eruptive lahar units with the evidence of transport of calcareous block  
1085 (up to 50 cm). The largest are in the lower unit. The base of the lahar sequence and the underlying fallout deposit of the  
1086 Pollena eruption are not visible in the photo. For the description of lithofacies see Tab. 2.

1087

#### 1088 *Area 2 – Acerra-Afragola*

1089 The Acerra and Afragola territories (about 12 km from Somma-Vesuvius) are located north and north-  
1090 west of Vesuvius, and are almost flat areas crossed by the Clanis river. Both the coarse fallout deposits  
1091 of the Pollena and 1631 eruptions are absent in this area. Here, only a thin, centimetric ash bed  
1092 overlies the Late Roman paleosol. This fine ash bed, which we correlate with the final

1093 phreatomagmatic phases of the Pollena eruption, is homogeneous, cohesive and mantles the ground  
1094 without any significant lateral variation. The overlying deposit is characterized by high thickness  
1095 variations, it is generally massive and contains vesicles from circular to flattened and coated by fine  
1096 ash. It has a matrix-supported texture and is composed of fine to very fine, very cohesive ash, and  
1097 contains scattered and more or less abundant pumice and lithic fragments (lithofacies mM) and  
1098 remains of vegetation (Barone et al., 2023). From one to three depositional units have been  
1099 recognized, marked by unconformities, and differences in grain-size or color. The uppermost unit  
1100 always contains white pumice fragments of the Avellino eruption. Very common are drying out  
1101 structures and water escape structures, which are vertical structures (Fig. C5) looking like fractures a  
1102 few cm large, filled by finer material transported by the escaping water, formed soon after the  
1103 emplacement of the sequence of the syn-eruptive lahars (Fig. C5). The maximum thickness recorded  
1104 in this area is about 90 cm.

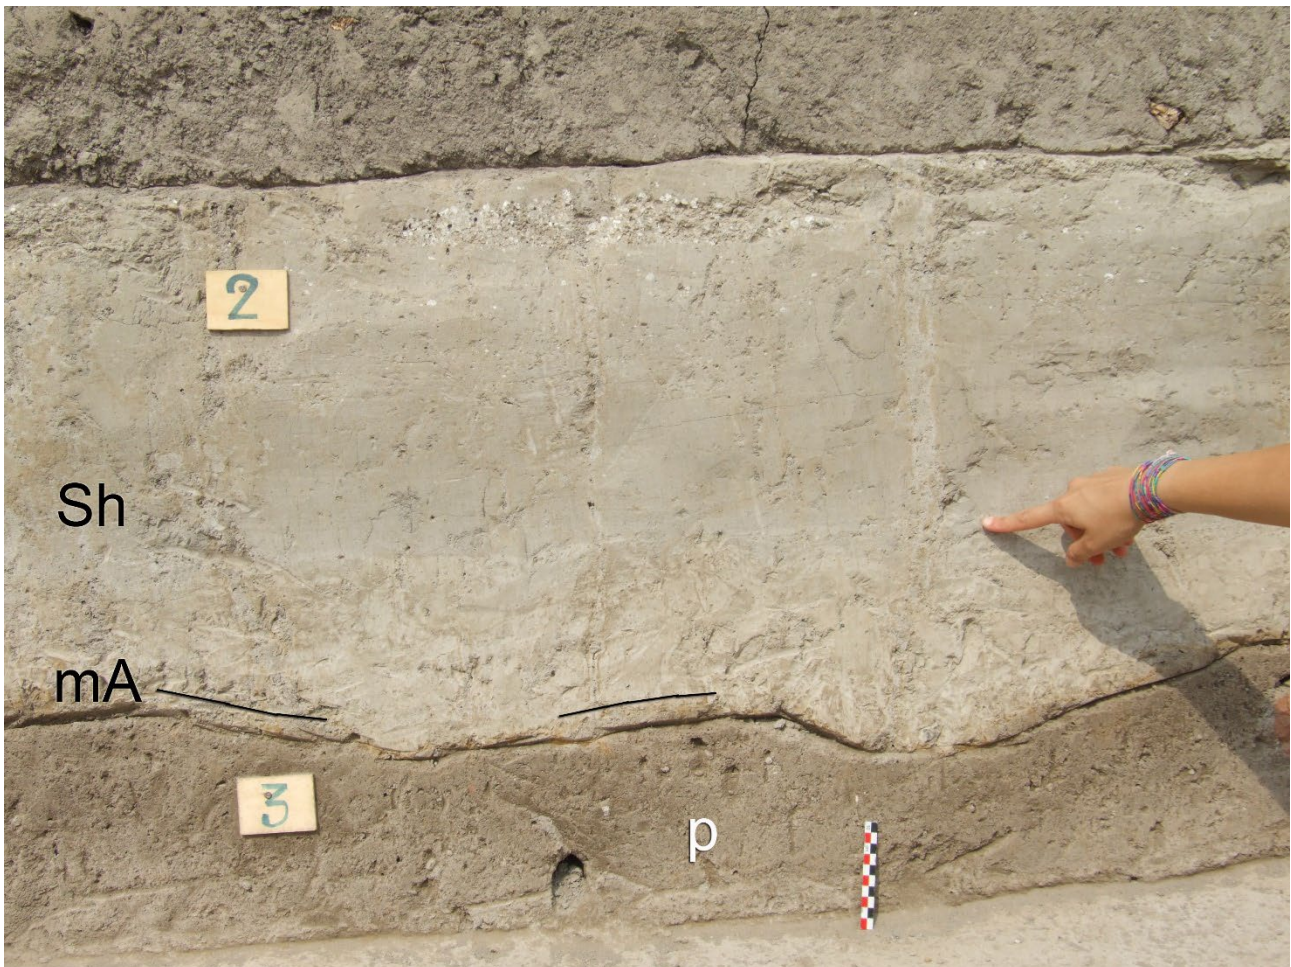

1105

1106 Fig. C5. Acerra (12 km from Somma-Vesuvius), lahar deposit (unit 2) overlaying a cultivated paleosol (unit 3). The index  
1107 finger indicates a water escape structure crossing the sequence of lahars. For the description of lithofacies see Tab. 2.

1108

1109 The top is almost always horizontal due to the erosion related to the modern anthropogenic activity,  
1110 and only in a few exposures it is capped by a paleosol, with traces of human presence of the Medieval  
1111 times and of the deposits of the 1631 eruption as well. The base of this latter deposit is a cm-thick  
1112 fine-ash bed with an internal plane-parallel layering emplaced by fallout. It underlies a massive  
1113 deposit with high thickness variations (max 20 cm) at the outcrop scale. It is composed of fine ash,  
1114 cohesive and vesiculated and contains scattered small pumice fragments (lithofacies mM). The  
1115 pumice fragments are vesicular, dark gray to blackish, highly porphyritic with leucite, pyroxene and  
1116 feldspar crystals. The stratigraphic position and lithology confirm their attribution to the 1631 primary  
1117 and secondary (lahars) deposits.

1118

### 1119 *Area 3 – Pomigliano-Marigliano*

1120 This area is located along the northern outer part of the Vesuvius apron (Santacroce et al., 2003). The  
1121 studied sequences start from the paleosol developed on top of the ash deposits of the AD 79 eruption.  
1122 The paleosol is mature and contains pottery fragments till the II century AD. Its top is undulated with  
1123 traces of ploughing spaced about 50 cm (a in Fig. C6). Representative sequences of the area include  
1124 a basal ash layer with a thickness ranging from 1 to 4 cm (b in Fig. C7), thickening in the depressions,  
1125 cohesive and locally vesiculated. It is here interpreted as co-ignimbritic ash emplaced by fallout  
1126 during the phreatomagmatic final phases of the Pollena eruption. Upwardly, the sequence includes  
1127 several lahar units from massive to slightly stratified, composed of fine and very cohesive ash, and  
1128 containing scattered greenish pumice fragments (lithofacies mM) (b1 in Fig. C7). Locally this deposit,  
1129 also in the case of multiple units, is cut by vertical drying cracks. The sequence is overlain by a 25-  
1130 30 cm thick mature paleosol, containing cultivation traces and majolica fragments (c in Figs. C6 and  
1131 C7).

1132 The top of this paleosol is undulated and covered by the primary deposit of the 1631 eruption (d in  
1133 Fig. C7). This latter is represented by a discontinuous medium-to-fine ash layer, slightly laminated  
1134 for contrasting grain-size, up to 5 cm thick, with a gray to violet color, and containing dark pumice  
1135 fragments and loose crystals of leucite, pyroxene and biotite (Fig. C7). Its thickness variation is due  
1136 both to slight internal variations (thickening in correspondence of depressions) and erosion by the  
1137 following lahars. These latter are composed of one to three flow units (d1 in Fig. C7), with a  
1138 cumulative total thickness varying from 10 to 45 cm. They are composed of massive fine and very  
1139 cohesive ash, and contain rare scattered dark pumice fragments similar to those of the 1631 eruption  
1140 (lithofacies mM). These sequences are overlain by recent, cultivated soil. Locally, thin ash beds of  
1141 the recent Vesuvius activity (like 1822, 1906) overlie the 1631 deposits.

1142

1143

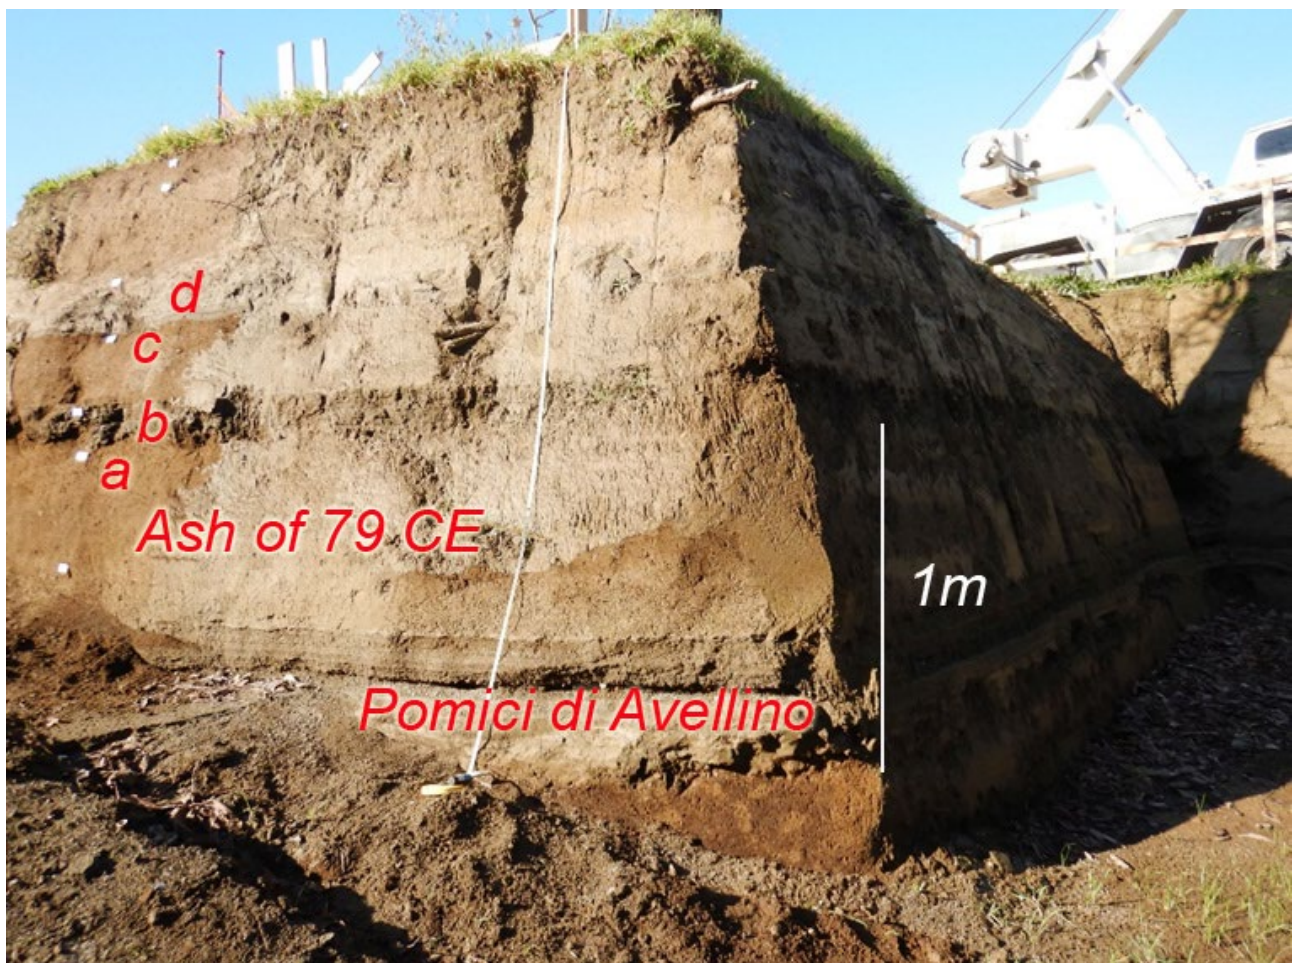

1144

1145 Fig. C6. Pomigliano, sequence of deposits including bottom to top: Bronze Age paleosol, Pomici di Avellino (unit EU 5  
 1146 of Di Vito et al., 2009), paleosol developed on top of Pomici di Avellino and buried by the Pollena eruption deposits. In  
 1147 the central part, fine ash deposits of the 79 CE eruption are visible. The top of the paleosol is undulated and ploughed. In  
 1148 particular: a = paleosol of Roman Age; b = primary and secondary deposits of the Pollena eruption; c = paleosol between  
 1149 Pollena and 1631 deposits; d = 1631 primary and secondary deposits. Further details in Fig. C7.

1150

1151

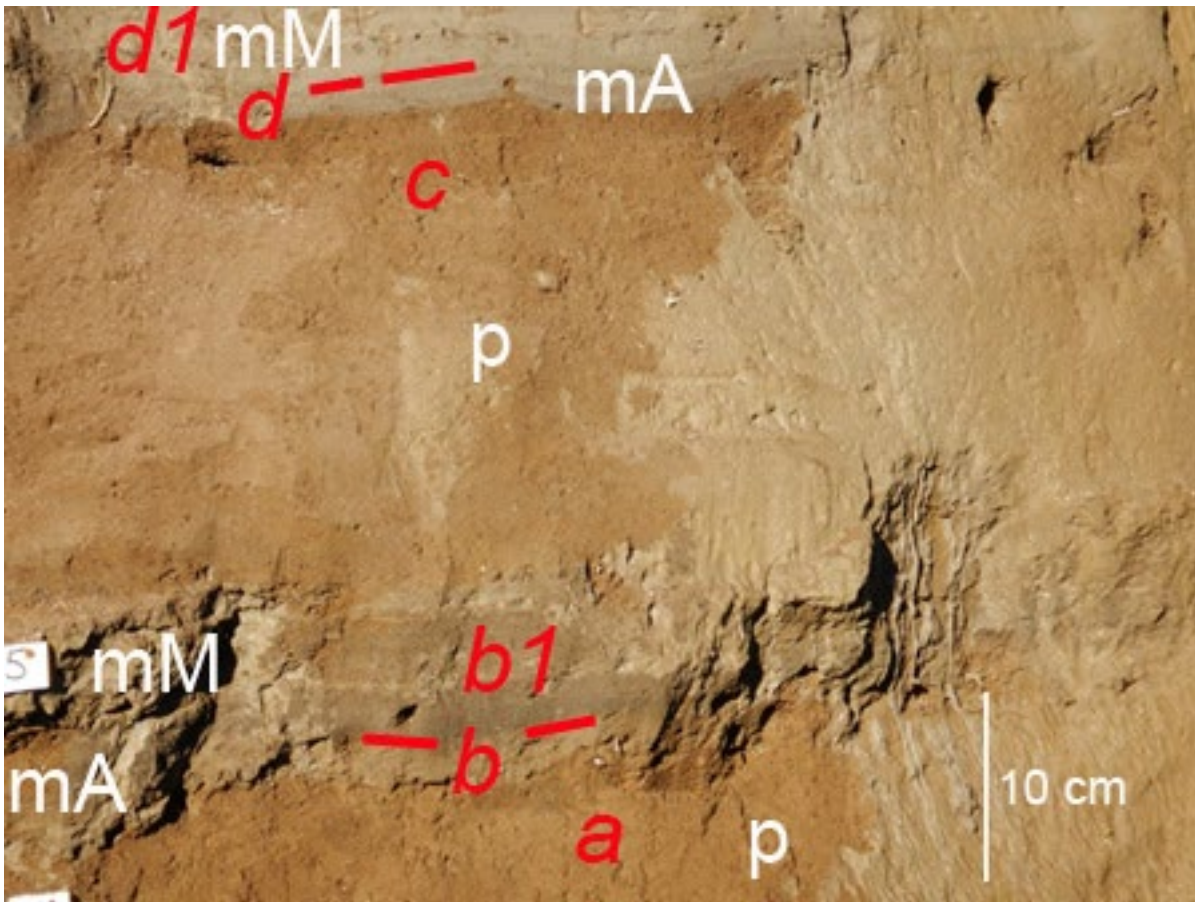

1152

1153 Fig. C7. Pomigliano, particular of Fig. C6: a = paleosol containing potteries of the II Cent. AD; b = ash deposit of the  
 1154 Pollena eruption; b1 = syn-eruptive lahars of the Pollena eruption; c = paleosol between Pollena and 1631; d = primary  
 1155 deposits of the 1631 eruption overlain by syn-eruptive lahars (d1). For the description of lithofacies see Tab. 2.

1156

1157 *Area 4 – Avella-Baiano Valley*

1158 We have analyzed several sequences along the *Avella-Baiano* Valley, both exposed and excavated  
 1159 for the present work. Here the sequences of primary deposits are often affected by deep erosion, in

1160 fact, in some places the Pollena primary deposits are completely lacking and only the syn-eruptive  
1161 lahar deposits are present on top of the late Roman paleosol. Where preserved, the paleosol has often  
1162 an undulated surface due to cultivation (ploughing and hoeing). The Pollena eruption sequence  
1163 consists of an alternation of coarse pumice and fine ash layers emplaced by fallout (a in Fig. C8). It  
1164 is up to 50 cm thick and ends with a cohesive yellowish ash layer (b in Fig. C8), overlain by the lahar  
1165 deposits, generally composed of 2-3 flow units (c in Fig. C8). The total thickness of the lahars is  
1166 largely variable with maxima at the base of the slopes where it can reach 2-3 m. In some excavations  
1167 we did not reach the base of the deposit, deeper than 3.5 m. In Fig. C8, it is possible to observe a  
1168 complete sequence of the Pollena deposits overlying a late Roman paleosol. The sequence includes  
1169 the fallout layers and thick lahar deposits. These latter are always massive, matrix-supported, and  
1170 contain abundant scattered pumice and lithic fragments (lithofacies Gms). In some cases, the lower  
1171 part contains several limestone fragments up to 10 cm in diameter. The described deposit has been  
1172 also found in the Roman Amphitheatre of Avella, where it has a variable thickness (order of  
1173 decimetric). Here, it has been almost all excavated and only remnants are presently exposed.  
1174 Generally, the upper part of the sequences is composed of an alternation of plane-parallel to cross-  
1175 layered sands and gravels, with abundant rounded limestone fragments, emplaced by several alluvial  
1176 episodes (post-eruptive) (lithofacies Sh-Ss). In these post-eruptive deposits, it is not uncommon to  
1177 find terracotta fragments from the Imperial Roman age.

1178

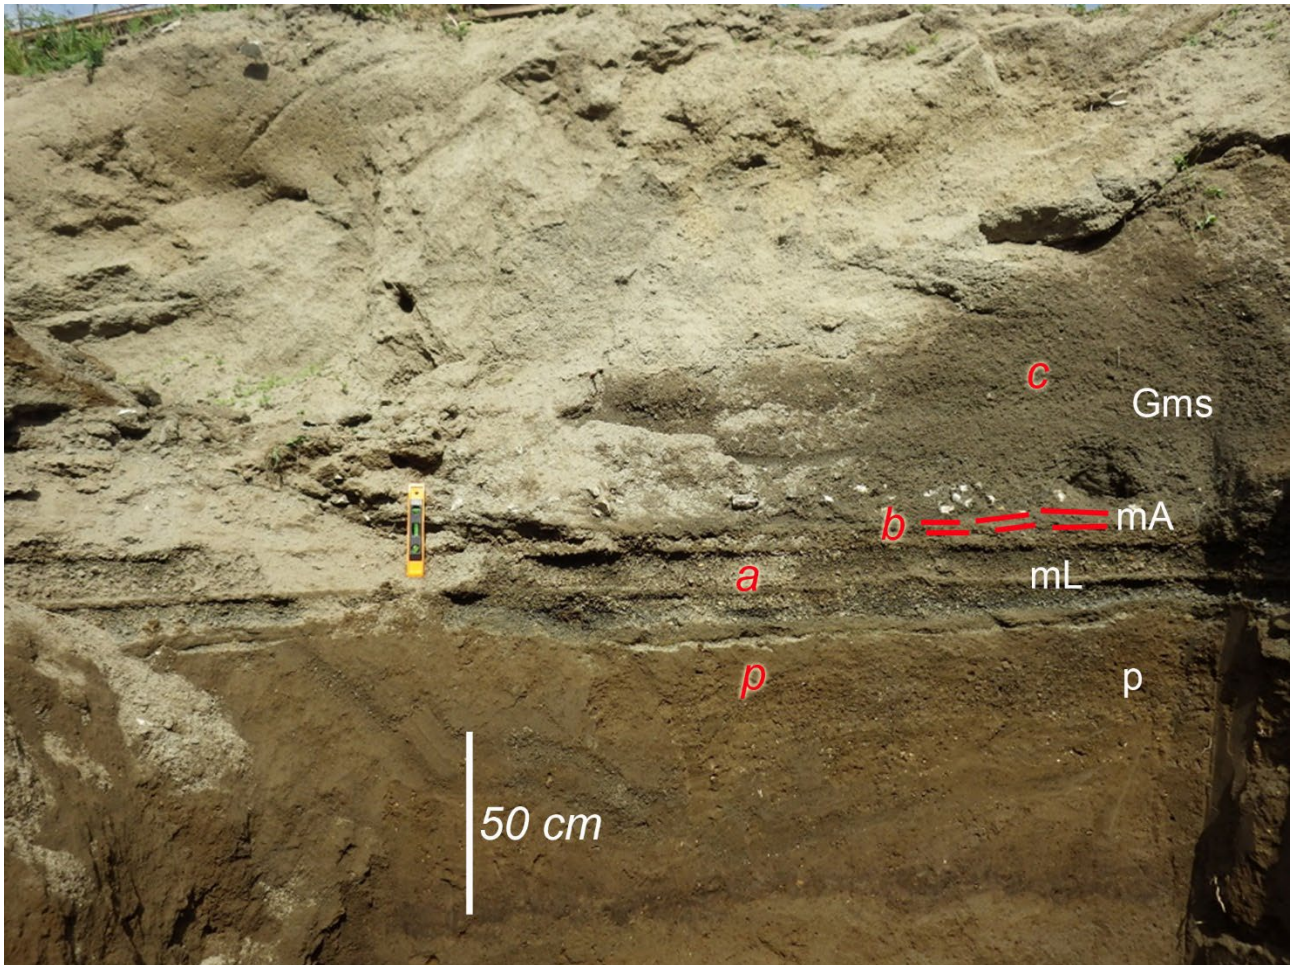

1179

1180 Fig. C8. Avella-Baiano Valley, the Pollena primary deposit (a,b) lies on a ploughed soil (p), and is covered by at least  
 1181 three flow units of lahars (c). For the description of lithofacies see Tab. 2.

1182

1183 The Pollena primary and secondary sequences are overlain by a mature paleosol with frequent  
 1184 evidence of cultivation (ploughing, p in Fig. C9) and locally by the 1631 eruption deposits. The  
 1185 primary deposit related to the 1631 eruption is not always present. It is up to 2 cm (a in Fig. C9) thick  
 1186 ash layer, gray-violet in color deposited by fallout deposit and overlaying a ploughed paleosol (p in  
 1187 Fig. C9). It is overlain by lahar deposits (b in Fig. C9) composed of several units and characterized  
 1188 by contrasting grain-sizes. The deposits are composed of medium ash, are massive and matrix-  
 1189 supported, and contain abundant scattered mm- to cm-sized pumice fragments (all with the same  
 1190 lithology of the primary deposits) and sometimes vegetal remain traces (lithofacies Gms).

1191



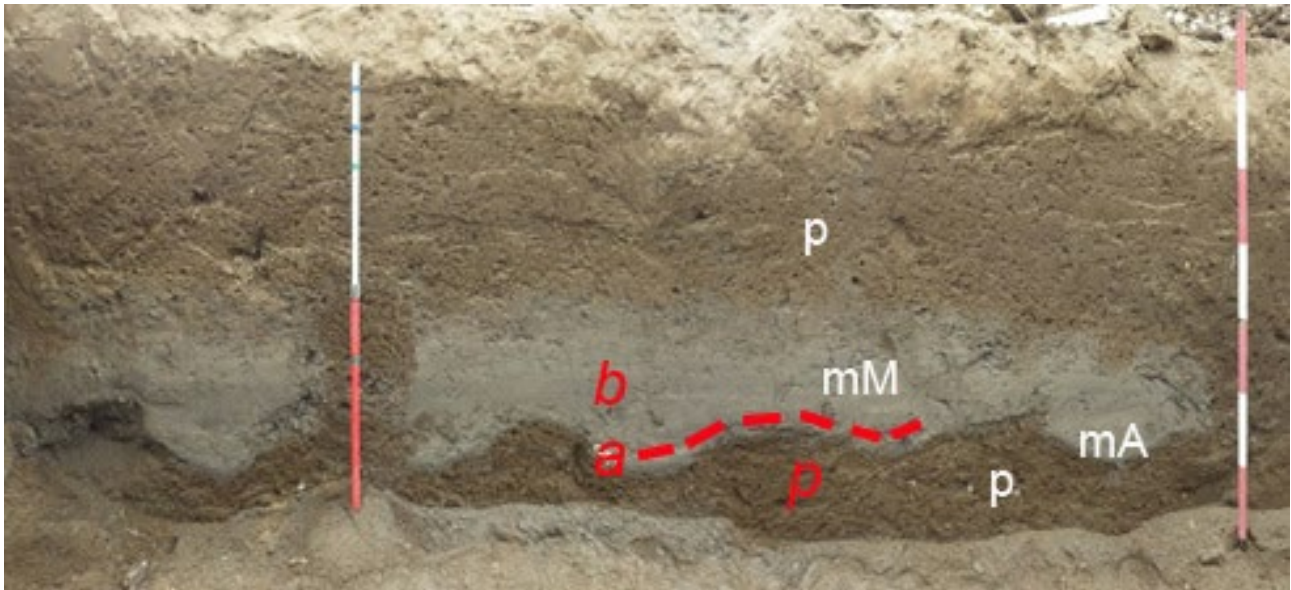

1192

1193 Fig. C9. Avella-Baiano Valley, particular of the 1631 primary (a) and secondary deposits (b, syn-eruptive lahars) in a  
 1194 trench at Cicciano locality. For the description of lithofacies see Tab. 2.

1195

1196 *Area 5 – Lauro Valley*

1197 Lauro Valley has characteristics similar to the Avella-Baiano Valley, but the primary deposits of  
 1198 Pollena and 1631 eruptions are thicker (Figs. 5 and 6) and coarser. In this valley, also the sequences  
 1199 are locally deeply eroded. In fact, the deposits of the Pollena eruption (normally 50-70 cm thick) (Fig.  
 1200 C10) are sometimes missing. They overlie a mature paleosol with abundant traces of cultivation.  
 1201 Overall, the characteristics of the deposits are very similar to the ones of the Nola area (10-15 km  
 1202 from Apennine source valleys). The overlying lahar deposits are always massive, matrix-supported,  
 1203 and composed of fine and very cohesive ash with abundant scattered pumices and lithic fragments  
 1204 (similar in lithology to those of the primary deposits) (lithofacies Gms). These deposits have a high  
 1205 variable thickness, with a measured maximum of 2 m, but sometimes reduced by erosion. In some  
 1206 trenches the base of the sequences was deeper than the investigated depth (>3.5 m).

1207

1208

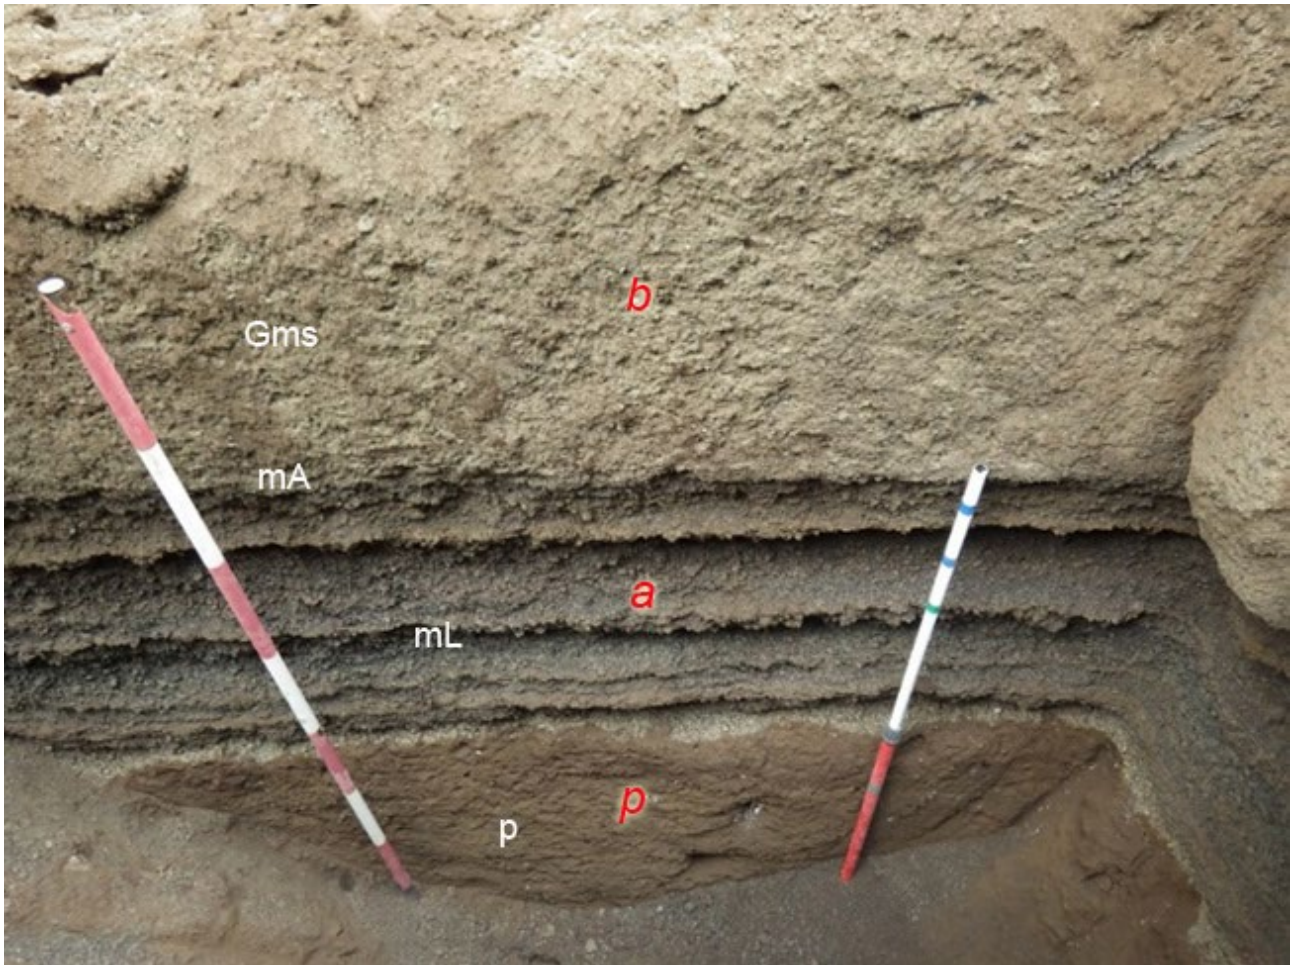

1209

1210 Fig. C10. Lauro Valley, Pago del Vallo, in particular: a = sequence of the Pollena fallout deposits overlain by syn-eruptive  
 1211 lahars (b); p = late Roman paleosol at the base. For the description of lithofacies see Tab. 2.

1212

1213 It is possible to evaluate the effects of the lahars on building in the Roman Villa di Lauro, at Taurano,  
 1214 where a 70 cm thick fallout is overlain, without paleosol, by syn-eruptive lahars which engulfed and  
 1215 transported pieces of walls, bricks and potteries. The lahar deposits are matrix supported and  
 1216 composed of fine to coarse ash and contain abundant pumice lapilli (all similar to the Pollena fallout  
 1217 deposits). They are massive, cohesive and have a thickness up to about 1 m, thickening in depressions  
 1218 and near barriers (Fig. C11).

1219 The sequence related to the eruption of 1631 is not always present, but it is possible to find its primary  
 1220 deposit, composed of a basal layer of stratified fine and medium thin ash beds, and minor dark pumice  
 1221 and lithic fragments overlain by a thin, very fine and cohesive accretionary lapilli-rich ash bed. The

1222 maximum measured thickness is 30 cm. The overlying lahar deposits are massive and matrix-  
1223 supported, composed of fine to coarse ash and contain abundant pumice fragments of the primary  
1224 deposit.

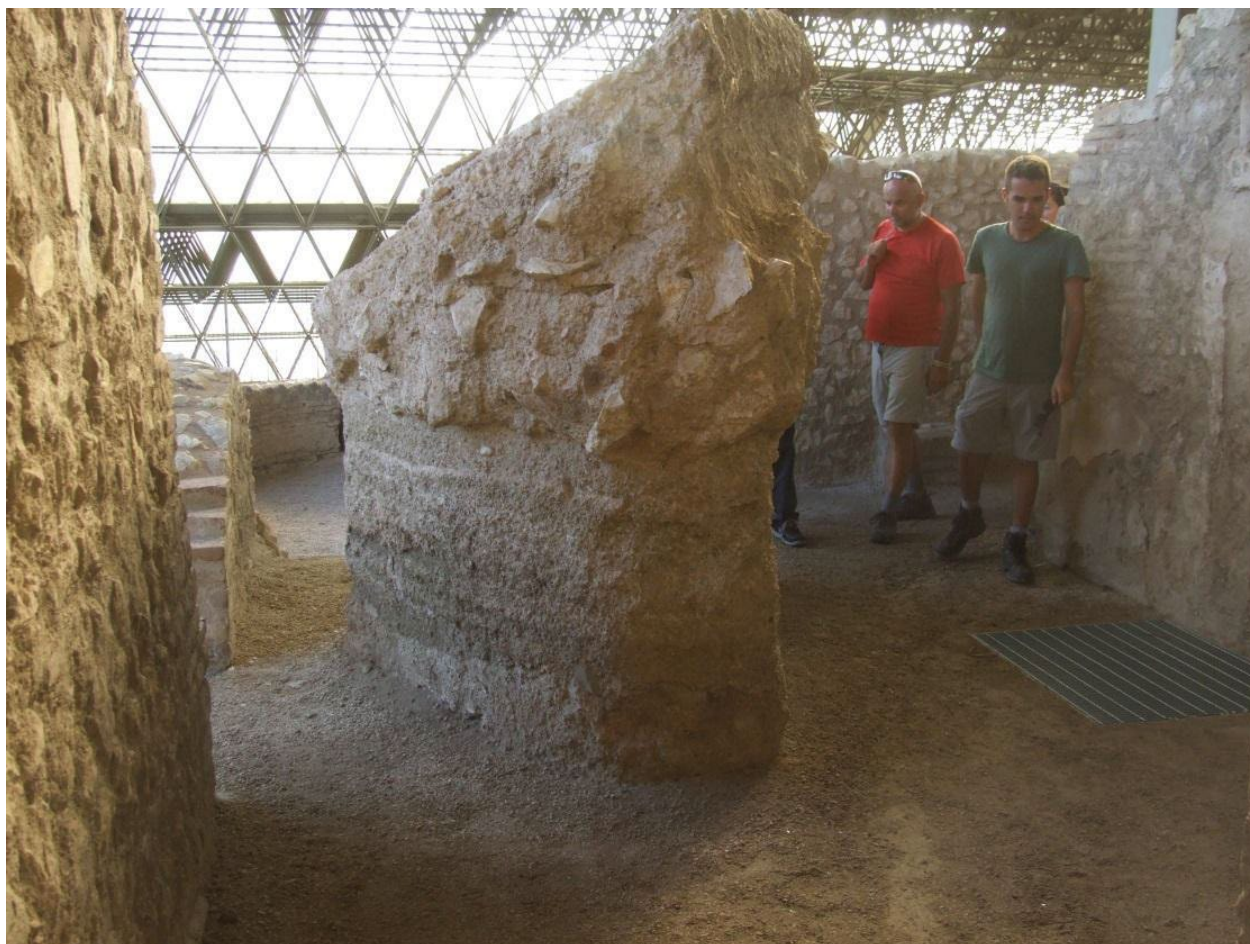

1225  
1226 Fig. C11. Taurano (Villa Lauro), baulk showing a thick sequence of the Pollena syn-eruptive lahar units filling the Roman  
1227 Villa. Some units engulf and transport pieces of walls and large blocks. The fallout sequence is not exposed in the Villa,  
1228 likely due to the presence of a roof. The deposit below the damaged walls is composed of multiple lahar units represented  
1229 by the Gms lithofacies (see Tab. 2).

1230

### 1231 **Author contribution**

1232 MDV: conceptualization, investigation, methodology, writing - original draft preparation, writing -  
1233 review & editing, funding acquisition; IR: data curation, investigation, writing - original draft  
1234 preparation; SdV: investigation, writing - original draft preparation, writing - review & editing; DMD:  
1235 investigation, methodology, data curation, writing - original draft preparation, writing - review &

1236 editing; MB: data curation, methodology, writing - original draft preparation; MdMV: writing -  
1237 review & editing; MR: conceptualization, writing - review & editing; LS: writing - review & editing;  
1238 GZ: investigation, writing - review & editing; EZ: investigation, methodology, writing - original draft  
1239 preparation; AC: conceptualization, writing - review & editing, funding acquisition.

1240

## 1241 **Acknowledgements**

1242 This work benefited of the agreement between Istituto Nazionale di Geofisica e Vulcanologia and the  
1243 Italian Presidenza del Consiglio dei Ministri, Dipartimento della Protezione Civile (DPC),  
1244 Convenzione INGV-DPC All. B2. The work was also supported by the INGV project Pianeta  
1245 Dinamico—Working Earth (CUP 1466 D53J19000170001—“Fondo finalizzato al rilancio degli  
1246 investimenti delle 1467 amministrazioni centrali dello Stato e allo sviluppo del Paese”, legge  
1247 145/2018)—Task V3 (MDV). The paper does not necessarily represent DPC official opinion and  
1248 policies. We thank very much Ulrich Kueppers, Lucia Capra, an anonymous reviewer and the editor  
1249 Andrea Di Muro for their help in improving this manuscript in the revision process.

1250

## 1251 **References**

1252 Acocella V and Funicello R (2006) Transverse systems along the extensional Tyrrhenian margin of  
1253 Central Italy and their influence on volcanism. *Tectonics* 25,1-24.

1254 Arguden AT and Rodolfo KS (1990) Sedimentologic and dynamic differences between hot and cold  
1255 laharic debris flows of Mayon Volcano, Philippines. *Geological Society of America Bulletin* 102,  
1256 865-876.

1257 Bardot L (2000) Emplacement temperature determinations of proximal pyroclastic deposits on  
1258 Santorini, Greece, and their implications. *Bulletin of Volcanology* 61, 450-467.

- 1259 Bardot L, McClelland E (2000) The reliability of emplacement temperature estimates using  
1260 paleomagnetic methods: a case study from Santorini, Greece. *Geophysical Journal International* 143,  
1261 39-51.
- 1262 Bartole R (1984) Tectonic Structure of the Latian-Campanian Shelf (Tyrrhenian Sea). *Bollettino di*  
1263 *Oceanologia Teorica Applicata* 2, 197-230.
- 1264 Baumann V, Bonadonna C, Cuomo S, Moscariello M (2020) Modelling of erosion processes  
1265 associated with rainfall-triggered lahars following the 2011 Cordon Caulle eruption (Chile). *Journal*  
1266 *of Volcanology and Geothermal Research* 390, 106727.
- 1267 Bisson M, Pareschi MT, Zanchetta G, Sulpizio R, Santacroce R (2007) Volcaniclastic debris-flow  
1268 occurrences in the Campania region (Southern Italy) and their relation to Holocene–Late Pleistocene  
1269 pyroclastic fall deposits: implications for large-scale hazard mapping. *Bulletin of Volcanology* 70,  
1270 157-167.
- 1271 Bisson M, Spinetti C, Sulpizio R (2014) Volcaniclastic flow hazard zonation in the Sub-Apennine  
1272 Vesuvian area using GIS and remote sensing. *Geosphere* 10, 1419-1431.
- 1273 Bisson M, Zanchetta G, Sulpizio R, Demi F (2013) A map for volcaniclastic debris flow hazards in  
1274 Apennine areas surrounding the Vesuvius volcano (Italy). *Journal of Maps* 9, 230-238.
- 1275 Blott SJ and Pye K (2001) Gradistat: A Grain Size Distribution and Statistics Package for the Analysis  
1276 of Unconsolidated Sediments. *Earth Surface Processes and Landforms* 26, 1237-1248.
- 1277 Braccini GC (1632) *Dell’Incendio Fattosi nel Vesuvio a XVI di Dicembre MDCXXXI*. Secondino  
1278 Roncagliolo, 104 pp.
- 1279 Brancaccio L, Cinque A, Romano P, Roskopf C, Russo F, Santangelo N, Santo A (1991)  
1280 Geomorphology and neotectonic evolution of a sector of the Tyrrhenian flank of the Southern  
1281 Apennines (Region of Naples, Italy). *Zeitschrift für Geomorphologie Supplement Bd.* 82, 47-58.

1282 Breard ECP, Lube G, Cronin SJ, Valentine GA (2015) Transport and deposition processes of the  
1283 hydrothermal blast of the 6 August 2012 Te Maari eruption, Mt. Tongariro. *Bulletin of Volcanology*  
1284 77, 100.

1285 Breard ECP, Lube G (2017) Inside pyroclastic density currents – uncovering the enigmatic flow  
1286 structure and transport behaviour in large-scale experiments. *Earth and Planetary Science Letters* 458,  
1287 22-36.

1288 Brocchini D, Principe C, Castradori D, Laurenzi MA, Gorla L (2001) Quaternary evolution of the  
1289 southern sector of the Campanian Plain and early Somma-Vesuvius activity: insights from the Trecase  
1290 1 well. *Mineralogy and Petrology* 73, 67-91.

1291 Capra L, Sulpizio R, Marquez-Ramirez VH, Coviello V, Doronzo DM, Arambula-Mendoza R, Cruz  
1292 S (2018) The anatomy of a pyroclastic density current: the 10 July 2015 event at Volcan de Colima  
1293 (Mexico). *Bulletin of Volcanology* 80, 34.

1294 Carling PA (2013) Freshwater megaflood sedimentation: What can we learn about generic processes?  
1295 *Earth-Science Reviews* 125, 87-113.

1296 Carrara E, Iacobucci F, Pinna E, Rapolla A (1973) Gravity and magnetic survey of the Campanian  
1297 volcanic area, S. Italy. *Bollettino di Geofisica Teorica e Applicata* 15, 39-51.

1298 Cas RAF, Wright HMN, Folkes CB, Lesti C, Porreca M, Giordano G, Viramonte JG (2011) The flow  
1299 dynamics of an extremely large volume pyroclastic flow, the 2.08-Ma Cerro Galán Ignimbrite, NW  
1300 Argentina, and comparison with other flow types. *Bulletin of Volcanology* 73, 1583-1609.

1301 Cinque A and Robustelli G (2009) Alluvial and coastal hazards caused by long-range effects of  
1302 Plinian eruptions: The case of the Lattari Mts. After the AD 79 eruption of Vesuvius. *Geological*  
1303 *Society London Special Publications* 322, 155-171.

- 1304 Cioni R, Santacroce R, Sbrana A (1999) Pyroclastic deposits as a guide for reconstructing the multi-  
1305 stage evolution of the Somma-Vesuvius Caldera. *Bulletin of Volcanology* 60, 207-222.
- 1306 Cioni R, Gurioli L, Lanza R, Zanella, E (2004) Temperatures of A.D. 79 pyroclastic density current  
1307 deposits (Vesuvius, Italy). *Journal of Geophysical Research* 109, B02207.
- 1308 Costa JE (1997) Hydraulic modeling for lahar hazards at Cascades volcanoes. *Environmental*  
1309 *Engineering Geoscience* 3, 21-30.
- 1310 D'Argenio B, Pescatore TS, Scandone P (1973) Schema geologico dell'Appennino meridionale  
1311 (Campania e Lucania). In: *Moderne vedute sulla geologia dell'Appennino*. Convegno (Roma, 16-18  
1312 Febbraio 1972). *Accademia Nazionale dei Lincei, Problemi Attuali di Scienza e Cultura, Quaderni*  
1313 183, 49-72.
- 1314 de' Michieli Vitturi M, Costa A, Di Vito MA, Sandri L, Doronzo DM (this issue). Lahar events in the  
1315 last 2,000 years from Vesuvius eruptions. Part 2: Formulation and validation of a computational  
1316 model based on a shallow layer approach.
- 1317 De Simone GF, Perrotta A, Scarpati C (2011) L'eruzione del 472 d.C. ed il suo impatto su alcuni siti  
1318 alle falde del Vesuvio. *Rivista Studi Pompeiani* 22, 61-71.
- 1319 De Vivo B, Rolandi G, Gans PB, Calvert A, Bohrson WA, Spera FJ, Belkin HE (2001) New  
1320 constraints on the pyroclastic eruptive history of the Campanian volcanic Plain (Italy). *Mineralogy*  
1321 *and Petrology* 73, 47-65.
- 1322 Di Crescenzo G and Santo A (2005) Nuovo contributo sul ruolo svolto dai livelli pomicei nelle aree  
1323 di distacco delle frane di colata rapida dei massicci carbonatici campani. *Convegno Nazionale La*  
1324 *mitigazione del rischio da colate di fango a Sarno e negli altri Comuni colpiti dagli eventi del maggio*  
1325 *1998. Napoli, 2 e 3 maggio 2005 - Sarno 4 e 5 maggio 2005.*
- 1326 Di Vito MA, Castaldo N, de Vita S, Bishop J, Vecchio G (2013) Human colonization and volcanic

1327 activity in the eastern Campania Plain (Italy) between the Eneolithic and Late Roman periods.  
1328 Quaternary International 303, 132-141

1329 Di Vito M.A., Calcaterra D., Petrosino P., Zanchetta G., De Vita S., Marotta E., Cesarano M. , De  
1330 Simone A., Sansivero F., Rucco I. (2019) Landslides, volcanism and volcano-tectonics: the fragility  
1331 of the Neapolitan territory. Geol. F. Trips Maps, Volume 11 (1.1)/2019.  
1332 <https://doi.org/10.3301/GFT.2019.01> - pp 1-53.

1333 Di Vito MA, Sulpizio R., Zanchetta G (1998). I depositi ghiaiosi della valle dei torrenti Clanio e  
1334 Acqualonga (Campania centro-orientale): significato stratigrafico e ricostruzione paleoambientale. Il  
1335 Quaternario Italian Journal of Quaternary Sciences 11, 273-286.

1336 Di Vito MA, Talamo P, de Vita S, Rucco I, Zanchetta G, Cesarano M (2019) Dynamics and effects  
1337 of the Vesuvius Pomice di Avellino Plinian eruption and related phenomena on the Bronze Age  
1338 landscape of Campania region (Southern Italy). Quaternary International 499, 231-244.

1339 Di Vito M, Zanella E, Gurioli L, Lanza R, Sulpizio R, Bishop J, Tema E, Boenzi G, Laforgia E (2009)  
1340 The Afragola settlement near Vesuvius, Italy: The destruction and abandonment of a Bronze Age  
1341 village revealed by archeology, volcanology and rock-magnetism. Earth and Planetary Science  
1342 Letters 277, 408-421.

1343 Doronzo DM (2012) Two new end members of pyroclastic density currents: Forced-convection  
1344 dominated and inertia-dominated. Journal of Volcanology and Geothermal Research 219-220, 87-91.

1345 Doronzo DM, Martí J, Sulpizio R, Dellino P (2012) Aerodynamics of stratovolcanoes during  
1346 multiphase processes. Journal of Geophysical Research 117, B01207.

1347 Doronzo DM, Dellino P (2013) Hydraulics of subaqueous ash flows as deduced from their deposits:  
1348 2. Water entrainment, sedimentation, and deposition, with implications on pyroclastic density current  
1349 deposit emplacement. Journal of Volcanology and Geothermal Research 258, 176-186.



- 1350 Doronzo DM (2013) Aeromechanic analysis of pyroclastic density currents past a building. Bulletin  
1351 of Volcanology 75, 684.
- 1352 Duller RA, Mountney NP, Russell AJ, Cassidy NC (2008) Architectural analysis of a volcanoclastic  
1353 jökulhlaup deposit, southern Iceland: sedimentary evidence for supercritical flow. Sedimentology 55,  
1354 939-964.
- 1355 Faccenna C, Funiciello R, Bruni A, Mattei M, Sagnotti L (1994) Evolution of a transfer related basin:  
1356 the Ardea basin (Latium, Central Italy). Basin Resources 5, 1-11.
- 1357 Fedi M and Rapolla A (1987) The Campanian Volcanic Area: analysis of the magnetic and  
1358 gravimetric anomalies. Bollettino della Società Geologica Italiana 106, 793-805.
- 1359 Finetti I and Morelli C (1974) Esplorazione di sismica a riflessione nei Golfi di Napoli e Pozzuoli.  
1360 Bollettino di Geofisica Teorica e Applicata 16, 62-63.
- 1361 Fiorillo F and Wilson RC (2004) Rainfall induced debris flows in pyroclastic deposits, Campania  
1362 (southern Italy). Engineering Geology 75, 263-289.
- 1363 Giordano G, Zanella E, Trolese M, Baffioni C, Vona A, Caricchi C, De Benedetti AA, Corrado S,  
1364 Romano C, Sulpizio R, Geshi N (2018) Thermal interactions of the AD79 Vesuvius pyroclastic  
1365 density currents and their deposits at Villa dei Papiri (Herculaneum archaeological site, Italy). Earth  
1366 and Planetary Science Letters 490, 180-192.
- 1367 Girolami L, Roche O, Druitt T, Corpetti T (2010) Velocity fields and depositional processes in  
1368 laboratory ash flows, with implications for the dynamics of dense pyroclastic flows. Bulletin of  
1369 Volcanology 72, 747-759.
- 1370 Gurioli L, Pareschi MT, Zanella E, Lanza R, Deluca E, Bisson M (2005) Interaction of pyroclastic  
1371 density currents with human settlements: Evidence from ancient Pompeii. Geology 33, 441-444.

1372 Gurioli L, Sulpizio R, Cioni R, Sbrana A, Santacroce R, Luperini W, Andronico D (2010) Pyroclastic  
1373 flow hazard assessment at Somma-Vesuvius based on the geological record. *Bulletin of Volcanology*  
1374 72, 1021-1038.

1375 Guzman S, Doronzo DM, Martí J, Seggiaro R (2020). Characteristics and emplacement mechanisms  
1376 of the Coranzulí ignimbrites (Central Andes). *Sedimentary Geology* 405, 105699.

1377 Ippolito F, Ortolani F, Russo M (1973) Struttura marginale tirrenica dell'Appennino campano:  
1378 reinterpretazioni di dati di antiche ricerche di idrocarburi. *Memorie della Società Geologica Italiana*  
1379 12, 227–250.

1380 Iverson RM, Denlinger RP, LaHusen RG, Logan M, (2000) Two-phase debris-flow across 3-D  
1381 terrain: Model predictions, *in* Wieczorek GF and Naeser ND, eds., *Debris-Flow Hazard Mitigation,*  
1382 *Mechanics, Prediction, and Assessment: Taipei, Taiwan, 16-18 August 2000: Rotterdam, Balkema,*  
1383 521-529.

1384 Jenkins SF, Phillips JC, Price R, Feloy K, Baxter PJ, Sri Hadmoko D, de Bélizal E (2015) Developing  
1385 building-damage scales for lahars: application to Merapi volcano Indonesia. *Bulletin of Volcanology*  
1386 77, 1-17.

1387 Lesti C, Porreca M, Giordano G, Mattei M, Cas R, Wright H, Viramonte J (2011) High temperature  
1388 emplacement of the Cerro Galán and Toconquis Group ignimbrites (Puna plateau, NW Argentina)  
1389 determined by TRM analyses. *Bulletin of Volcanology* 73, 1535-1565.

1390 Lowe DR, Williams SN, Leigh H, Connort CB, Gemmell JB, Stoiber RE (1986) Lahars initiated by  
1391 the 13 November 1985 eruption of Nevado del Ruiz, Colombia. *Nature* 324, 51-53.

1392 Lowe DR (1988) Suspended-load fallout rate as an independent variable in the analysis of current  
1393 structures. *Sedimentology* 35, 765–776.

- 1394 Lube G, Cronin S, Manville V, Procter J, Cole S, Freundt A (2012) Energy growth in laharc mass  
1395 flows. *Geology* 40, 475-478.
- 1396 Macedonio G and Pareschi MT (1992) Numerical simulation of some lahars from Mount St. Helens.  
1397 *Journal of Volcanology and Geothermal Research* 54, 65-80.
- 1398 Manville V, Nemeth K, Kano K (2009) Source to sink: A review of three decades of progress in the  
1399 understanding of volcanoclastic processes, deposits, and hazards. *Sedimentary Geology* 220, 136-161.
- 1400 Mariani M and Prato R (1988) I bacini neogenici costieri del margine tirrenico: approccio sismico-  
1401 stratigrafico. *Memorie della Società Geologica Italiana* 41, 519-531.
- 1402 Marotta E., Berrino G., de Vita S., Di Vito M.A., Camacho A.G., 2022. Structural setting of the Ischia  
1403 resurgent caldera (Southern Tyrrhenian Sea, Italy) by integrated 3D gravity inversion and geological  
1404 models. In: Marotta, E., D’Auria, L., Zaniboni, F. and Nave, R. (eds) *Volcanic Island: from Hazard  
1405 Assessment to Risk Mitigation*. Geological Society, London, Special Publications, 519.
- 1406 Martí J, Doronzo DM, Pedrazzi D, Colombo F (2019) Topographical controls on small-volume  
1407 pyroclastic flows. *Sedimentology* 66, 2297-2317.
- 1408 McClelland E, Druitt TH (1989) Paleomagnetic estimates of emplacement temperatures of  
1409 pyroclastic deposits on Santorini, Greece. *Bulletin of Volcanology* 51, 16-27.
- 1410 McClelland E (1996) Theory of CRM acquired by grain growth, and its implications for TRM  
1411 discrimination and paleointensity determination in igneous rocks. *Geophysical Journal International*  
1412 126, 271-280.
- 1413 Newhall CG and Punongbayan R (Eds.) (1996) *Fire and mud: eruptions and lahars of Mount  
1414 Pinatubo, Philippines*. Quezon City: Philippine Institute of Volcanology and Seismology, 1126 pp.

1415 Orsi G, de Vita S, Di Vito MA (1996) The restless, resurgent Campi Flegrei Nested Caldera Italy.:  
1416 constraints on its evolution and configuration. *Journal of Volcanology and Geothermal Research* 74,  
1417 179-214.

1418 Pareschi MT, Favalli M, Giannini F, Sulpizio R, Zanchetta G, Santacroce R (2000) May 5, 1998,  
1419 Debris flows in circumvesuvian areas (Southern Italy), insights for hazard assessment. *Geology* 28,  
1420 639-642.

1421 Pareschi MT, Santacroce R, Sulpizio R, Zanchetta G (2002) The volcanoclastic mass flow hazard  
1422 related to the remobilization of fallout deposits in southern Campania, Italy. Explosive volcanism in  
1423 subduction zones, Mount Pelée, Martinique, 12-16 May 2002, abstract volume.

1424 Patacca E and Scandone P (2007) Geology of the Southern Apennines. *Bollettino della Società*  
1425 *Geologica Italiana Special Issue 7*, 75-119.

1426 Paterson, GA, Muxworthy AR, Roberts AP, MacNiocaill C (2010). Paleomagnetic determination of  
1427 emplacement temperatures of pyroclastic deposits: an under-utilized tool. *Bulletin of Volcanology*,  
1428 72, 309-330.

1429 Peccerillo A (2003) Plio-Quaternary magmatism in Italy. *Episodes* 26, 222-226.

1430 Perrotta A, Scarpati C, Luongo G, Aoyagi M (2006) Burial of Emperor Augustus' villa at Somma  
1431 Vesuviana (Italy) by post-79 AD Vesuvius eruptions and reworked (lahars and stream flow) deposits.  
1432 *Journal of Volcanology and Geothermal Research* 158, 445-466.

1433 Pierson TC (1985) Initiation and flow behavior of the 1980 Pine Creek and Muddy River lahars, Mt.  
1434 St. Helens, Washington. *Geological Society of America Bulletin* 96, 1056-1069.

1435 Piochi M, Pappalardo L, De Astis G (2004) Geo-chemical and isotopic variations within the  
1436 Campanian Comagmatic Province: implications on magma source composition, *Annals of*  
1437 *Geophysics* 47, 1485-1499.

1438 Pittari A, Cas RAF, Monaghan JJ, Martí J (2007) Instantaneous dynamic pressure effects on the  
1439 behaviour of lithic boulders in pyroclastic flows: the Abrigo Ignimbrite, Tenerife, Canary Island.  
1440 *Bulletin of Volcanology* 69, 265-279.

1441 Porreca M, Mattei M, Mac Niocaill C, Giordano G, McClelland E, Funicciello R (2007) Paleomagnetic  
1442 evidence for low-temperature emplacement of the phreatomagmatic Peperino Albano ignimbrite  
1443 (Colli Albani volcano, Central Italy). *Bulletin of Volcanology* 70, 877-893.

1444 Roche O (2012) Depositional processes and gas pore pressure in pyroclastic flows: an experimental  
1445 perspective. *Bulletin of Volcanology* 74, 1807-1820.

1446 Roche O, Niño Y, Mangeney A, Brand B, Pollock N, Valentine GA (2013) Dynamic pore-pressure  
1447 variations induce substrate erosion by pyroclastic flows. *Geology* 41, 1107-1110.

1448 Roche O (2015) Nature and velocity of pyroclastic density currents inferred from models of  
1449 entrainment of substrate lithic clasts. *Earth and Planetary Science Letters* 418, 115-125.

1450 Rodolfo KS (2000) The hazard from lahars and jökulhlaups. In: *Encyclopedia of Volcanoes:*  
1451 *Academic Press, Philadelphia, 973-995.*

1452 Rodolfo KS and Arguden AT (1991) Rain-lahar generation and sediment-delivery systems at Mayon  
1453 Volcano, Philippines: Sedimentation in Volcanic Settings, *SEPM Special Publication* 45, 71-87.

1454 Rodríguez-Sedano LA, Sarocchi D, Caballero L, Borselli L, Ortiz-Rodríguez AJ, Cerca-Ruiz MF,  
1455 Moreno-Chávez G, Franco Ramos O (2022) Post-eruptive lahars related to the 1913 eruption in La  
1456 Lumbre Ravine, Volcán de Colima, Mexico: The influence of ravine morphometry on flow dynamics.  
1457 *Journal of Volcanology and Geothermal Research* 421, 107423.

1458 Rolandi G, Barrella AM, Borrelli A (1993) The 1631 eruption of Vesuvius. *Journal of Volcanology*  
1459 *and Geothermal Research* 58, 183-201.

1460 Rolandi G, Munno R, Postiglione I (2004) The A.D. 472 eruption of the Somma volcano. *Journal of*  
1461 *Volcanology and Geothermal Research* 129, 291-319.

1462 Rosi M, Principe C, Vecci R (1993) The 1631 Vesuvius eruption. A reconstruction based on historical  
1463 and stratigraphical data. *Journal of Volcanology and Geothermal Research* 58, 151-182.

1464 Rosi M and Santacroce R (1983) The A.D. 472 “Pollena” eruption: volcanological and petrological  
1465 data for this poorly-known, Plinian-type event at Vesuvius. *Journal of Volcanology and Geothermal*  
1466 *Research* 17, 249-271.

1467 Russell AJ, Knudsen O (1999) An ice-contact rhythmite (turbidite) succession deposited during the  
1468 November 1996 catastrophic outburst flood (jökulhlaup), Skeidarárjökull, Iceland. *Sedimentary*  
1469 *Geology* 127, 1-10.

1470 Sandri L, de' Michieli Vitturi M, Costa A, Di Vito MA, Rucco I, Doronzo DM, Bisson M, Gianardi  
1471 R, de Vita S, Sulpizio R (this issue) Lahar events in the last 2,000 years from Vesuvius eruptions.  
1472 Part 3: Hazard assessment over the Campanian Plain.

1473 Santacroce R, Cioni R, Marianelli P, Sbrana A, Sulpizio R, Zanchetta G, Donahue DJ, Joron JL  
1474 (2008) Age and whole rock-glass compositions of proximal pyroclastics from the major explosive  
1475 eruptions of Somma-Vesuvius: A review as a tool for distal tephrostratigraphy. *Journal of*  
1476 *Volcanology and Geothermal Research* 177, 1-18.

1477 Santacroce R., Sbrana A., Andronico D., Cioni R., Di Vito M., Marianelli P., Sulpizio R., Zanchetta  
1478 G., Arrighi S., Benvenuti E., Gurioli L., Leoni F.M., Luperini W., 2003. *Carta Geologica del Vesuvio*  
1479 *in scala 1:15.000*, Santacroce R., Sbrana A., eds. *Cartografia derivata dai rilievi geologici in scala*  
1480 *1:10.000 Regione Campania e dai rilievi in scala 1:25.000 del Progetto CARG., S.EL.C.A., Firenze.*

1481 Santangelo N, Romano P, Ascione A, Russo Ermolli E (2017) Quaternary evolution of the Southern  
1482 Apennines coastal plains: A review. *Geologica Carpathica* 68, 43-56.

1483 Scott KM (1989) Magnitude and frequency of lahars and lahar-runout flows in the Toutle-Cowlitz  
1484 River System. U. S. Geological Survey Professional Paper 1447-B, 1–33.

1485 Scott KM, Vallance JW, Pringle PT (1995) Sedimentology, behavior, and hazard of debris flows at  
1486 Mount Rainer, Washington. U. S. Geological Survey Professional Paper 1547, 1-56.

1487 Scott KM, Macias JL, Naranjo JA, Rodriguez S, McGeehin JP (2001) Catastrophic debris flows  
1488 transformed from landslide in volcanic terrains: mobility, hazard assessment and mitigation  
1489 strategies. US Geol Surv Prof Pap. 1630, 1-59.

1490 Sheridan MF, Bonnard C, Carrero C, Siebe C, Strauch W, Navarro M, Calero JC, Trujillo NB (1999)  
1491 Report of the 30 October 1998 rock fall/avalanche and breakout flow of Casita Volcano, Nicaragua,  
1492 triggered by Hurricane Mitch. Landslide News 12, 2-4.

1493 Siebe C, Schaaf P, Urrutia-Fucugauchi J (1999) Mammoth bones embedded in a late Pleistocene lahar  
1494 from Popocatepetl volcano, near Tocuila, central Mexico. Geological Society of America Bulletin  
1495 111, 1550-1567.

1496 Smith G, Williams R, Rowley PJ, Parsons DR (2018) Investigation of variable aeration of  
1497 monodisperse mixtures: implications for pyroclastic density currents. Bulletin of Volcanology 80, 67.

1498 Spence RJS, Zuccaro G, Petrazzuoli S, Baxter PJ (2004) Resistance of buildings to pyroclastic flows:  
1499 analytical and experimental studies and their application to Vesuvius. Natural Hazards Review 5, 48-  
1500 59.

1501 Stanzione M, Di Vito MA, Aurino P, Lumaga MRB (2023) Sacred plant impressions from Somma-  
1502 Vesuvius volcanic ash deposits: A medicinal garden in Late Antique Acerra (Naples, Campania,  
1503 Italy)? Journal of Archaeological Science: Reports 47, 103802.

1504 Sulpizio R, Mele D, Dellino P, La Volpe L (2005) A complex, Subplinian-type eruption from low-  
1505 viscosity, phonolitic to tephri-phonolitic magma: the AD 472 (Pollena) eruption of Somma-Vesuvius,  
1506 Italy. *Bulletin of Volcanology* 67, 743-767.

1507 Sulpizio R, Zanchetta G, Demi F, Di Vito MA, Pareschi MT, Santacroce R (2006) The Holocene  
1508 syneruptive volcanoclastic debris flows in the Vesuvian area: Geological data as a guide for hazard  
1509 assessment. *Geological Society of America Special Paper* 402, 203-221.

1510 Sulpizio R, Dellino P, Doronzo DM, Sarocchi D (2014) Pyroclastic density currents: state of the art  
1511 and perspectives. *Journal of Volcanology and Geothermal Research* 283, 36-65.

1512 Tema E, Zanella E, Pavón-Carrasco FJ, Kondopoulo D, Pavlides S (2015) Palaeomagnetic analysis  
1513 on pottery as indicator for the pyroclastic flows deposit temperature: New data and statistical  
1514 interpretation from the Minoan eruption of Santorini, Greece. *Geophysical International Journal* 203,  
1515 33-47.

1516 Thouret JC, Arapa E, Charbonnier S, Guerrero A, Kelfoun K, Cordoba G, Rodriguez D, Santoni O  
1517 (2022) Modeling tephra fall and sediment-water flows to assess their impact on a vulnerable building  
1518 stock in the City of Arequipa, Peru. *Frontiers in Earth Science* 10, 865989.

1519 Toyos G, Gunasekera R, Zanchetta G, Oppenheimer C, Sulpizio R, Favalli M, Pareschi MT (2008)  
1520 GIS-assisted modelling for debris flow hazard assessment based on the events of May 1998 in the  
1521 area of Sarno, Southern Italy: II. Velocity and dynamic pressure. *Earth Surface Processes and  
1522 Landforms* 33, 1693-1708.

1523 Vallance JW and Iverson R (2015) Lahars and their deposits. In: Sigurdsson, H., Houghton, B.F.,  
1524 McNutt, S.R., Rymer, H., Stix, J. (Eds.), *Encyclopedia of Volcanoes*. Academic Press, London, 649-  
1525 664.



1526 Vallance JW and Scott KM (1997) The Osceola mudflow from Mount Rainer: Sedimentology and  
1527 hazards implications of a huge clay-rich debris flow. Geological Society of America Bulletin 109,  
1528 143-163.

1529 Vitale S and Ciarcia S (2018) Tectono-stratigraphic setting of the Campania region (southern Italy),  
1530 Journal of Maps 14, 9-21.

1531 Voight B (1990) The 1985 Nevado del Ruiz volcano catastrophe: anatomy and retrospection. Journal  
1532 of Volcanology and Geothermal Research 42, 151-188.

1533 Waitt RB Jr, Pierson TC, MacLeod NS, Janda RJ, Voight B, Holcomb RT (1983) Eruption-  
1534 triggered avalanche, flood, and lahar at Mount St. Helens - Effects of winter snowpack. Science 221,  
1535 1394-1397.

1536 Walsh B, Coviello V, Capra L, Procter J, Marquez-Ramirez V (2020) Insights into the internal  
1537 dynamics of natural lahars from analysis of 3-component broadband seismic signals at Volcan de  
1538 Colima, Mexico.

1539 Whipple KX, Hancock GS, Anderson RS (2000) River incision into bedrock: Mechanics and relative  
1540 efficacy of plucking, abrasion, and cavitation. Geological Society of America Bulletin 112, 490-503.

1541 White S, García-Ruiz JM, Martí-Bono C, Valero B, Errea MP, Gómez-Villar A (1997) The 1996  
1542 Biescas campsite disaster in the Central Spanish Pyrenees and its spatial and temporal context.  
1543 Hydrological Processes 11, 1797-1812.

1544 Zanchetta G, Sulpizio R, Pareschi MT, Leoni FM, Santacroce R (2004a) Characteristics of May 5-6,  
1545 1998 volcanoclastic debris flows in the Sarno area (Campania, southern Italy): relationships to  
1546 structural damage and hazard zonation. Journal of Volcanology and Geothermal Research 133, 377-  
1547 393.

- 1548 Zanchetta G, Sulpizio R, Di Vito MA (2004b). The role of volcanic activity and climate in alluvial  
1549 fan growth at volcanic areas: an example from southern Campania (Italy). *Sedimentary Geology* 168,  
1550 249-280.
- 1551 Zanella E, Gurioli L, Pareschi MT, Lanza R (2007). Influences of urban fabric on pyroclastic density  
1552 currents at Pompeii (Italy): 2. Temperature of the deposits and hazard implications. *Journal of*  
1553 *Geophysical Research* 112, B05214.
- 1554 Zanella E, Gurioli L, Lanza R, Sulpizio R, Bontempi M (2008). Deposition temperature of the AD  
1555 472 Pollena pyroclastic density current deposits, Somma-Vesuvius, Italy. *Bulletin of Volcanology*  
1556 70, 1237-1248.
- 1557 Zanella E, Sulpizio R, Gurioli L, Lanza R (2015). Temperatures of the pyroclastic density currents  
1558 deposits emplaced in the last 22 kyr at Somma-Vesuvius (Italy). *Geological Society, London, Special*  
1559 *Publication, The Use of Palaeomagnetism and Rock Magnetism to Understand Volcanic Processes*  
1560 396.
- 1561 Zaragoza G, Caballero-Garcia L, Capra L, Nieto-Torres A (2020) Lahares secundarios en el volcan  
1562 Popocatepetl: El lahar Nexpayantla del 4 de febrero, 2010. *Revista Mexicana de Ciencias Geologicas*  
1563 37, 121-134.
- 1564 Zuccaro G, De Gregorio D (2013) Time and space dependency in impact damage evaluation of a sub-  
1565 Plinian eruption at Mount Vesuvius. *Natural Hazards* 68, 1399-1423.
