# Supplementary material for: Lahar events in the last 2,000 years from Vesuvius eruptions. Part 1: Distribution and impact on densely-inhabited territory estimated from field data analysis
Source: Copernicus journal article supplement (doi:10.5194/egusphere-2023-1302), 2023-08-01
Supplement: Supplementary file [file egusphere-2023-1302-AC3-supplement.pdf]

1 **Lahar events in the last 2,000 years from Vesuvius eruptions. Part 1: Distribution and impact**  
2 **on densely-inhabited territory estimated from field data analysis**

3 Mauro A. Di Vito (1,\*), Ilaria Rucco (2), Sandro de Vita (1), Domenico M. Doronzo (1), Marina Bisson (3), Mattia de'  
4 Michieli Vitturi (3), Mauro Rosi (4), Laura Sandri (5), Giovanni Zanchetta (4), Elena Zanella (6), Antonio Costa (5)

5 (1) Istituto Nazionale di Geofisica e Vulcanologia - Sezione di Napoli Osservatorio Vesuviano, Napoli, Italy

6 (2) Heriot-Watt University, School of Engineering and Physical Sciences, Edinburgh, United Kingdom

7 (3) Istituto Nazionale di Geofisica e Vulcanologia - Sezione di Pisa, Pisa Italy

8 (4) Università di Pisa, Dipartimento di Scienze della Terra, Pisa, Italy

9 (5) Istituto Nazionale di Geofisica e Vulcanologia - Sezione di Bologna, Bologna, Italy

10 (6) Università di Torino, Dipartimento di Scienze della Terra, Torino, Italy

11 \*Corresponding author: Mauro A. Di Vito (mauro.divito@ingv.it)

12

13 **Abstract**

14 Lahars represent some of the most dangerous phenomena in volcanic areas for their destructive  
15 power, causing dramatic changes in the landscape with no premonitory signs and impacting on  
16 population and infrastructures. In this regard, the Campanian Plain turns out to be very prone to the  
17 development of these phenomena, since the slopes of the Somma-Vesuvius and Campi Flegrei  
18 volcanoes, along with the Apennine reliefs are mantled by pyroclastic deposits that can be easily  
19 ~~remobilised~~remobilized, especially after intense and/or prolonged rainfall.

20 This study focuses on the analysis of the pyroclastic fall and flow deposits and of the syn- and post-  
21 eruptive lahar deposits related to two sub-Plinian eruptions of Vesuvius, 472 ~~AD~~CE (Pollena) and  
22 1631. To begin with, historical and field data from the existing literature and from hundreds of  
23 outcrops were collected and organized into a database, which was integrated with several new pieces

24 of data. In particular, stratigraphic, sedimentological (facies analysis and laboratory) and  
25 archaeological analyses were carried out, in addition to rock magnetic investigations and impact  
26 parameter calculations. The new data are ~~mainly~~also referred to the finding of ash beds in more distal  
27 areas, which ~~was~~were included into new isopach maps for the two sub-Plinian eruptions.

28 The results show that for both the eruptions the distribution of the primary deposits is wider than ~~the~~  
29 ~~one~~ previously known. A consequence of these results is that a wider areal impact should be expected  
30 in terms of civil protection, as the sub-Plinian scenario is the reference one for a future large eruption  
31 of Vesuvius. Such distribution of the pyroclastic deposits directly affects the one of the lahar deposits,  
32 also because a significant remobilization took place during and after the studied eruptions, which  
33 involved the distal phreatomagmatic ash. From these integrated analyses, it was possible to constrain  
34 the timing of the deposition and the kind of deposits remobilized (pyroclastic fall vs. flow), as well  
35 as was possible to calculate the velocities and dynamic pressures of the lahars, and ultimately- infer  
36 the lahar transport and emplacement mechanisms.

37 The multidisciplinary approach adopted in this work shows how it is crucial to assess the impact of  
38 lahars in densely populated areas even at distances of several to tens of km from active volcanoes.  
39 This especially applies to large parts of the densely populated areas around Somma-Vesuvius up to  
40 the nearby Apennine valleys.

41 Keywords: Somma-Vesuvius; Apennine valleys; pyroclastic deposits; lahars; areal distribution; local  
42 impact.

43

## 44 **1. Introduction**

45 The ~~emplacement~~movement of volcanoclastic mass flows, and the consequent damage along the  
46 flanks of active volcanoes and perivolcanic plains, represent a constant threat to inhabited areas and  
47 populations (e.g., Waite et al., 1983; Lowe et al., 1986; Pierson, 1985; Newhall and Punongbayan,

48 1996). ~~These phenomena~~ Such systems are variably-fluidized, gravity-driven flows that consist of a  
49 mixture of pyroclastic sediment and water. ~~are~~ They can be triggered by various mechanisms, among  
50 which the most common are intense or prolonged atmospheric precipitations (Arguden and Rodolfo,  
51 1990; Rodolfo and Arguden, 1991; Pareschi et al., 2000; Rodolfo, 2000; Scott et al., 2001; Vallance  
52 and Iverson, 2015). Such precipitations or water runoff, especially during and/or ~~immediately~~ after  
53 the eruptions, can cause the ~~detachment of landslides that can evolve into lahars~~ remobilization of  
54 pyroclastic deposits evolving into water-saturated multiphase systems called lahars (e.g., White et al.,  
55 1997; Sheridan et al., 1999; Scott et al., 2001; Baumann et al., 2020). The last century was affected  
56 by a significant number of highly-impacting lahar events associated to well-studied explosive  
57 volcanic eruptions worldwide, such as for example at Colima (Mexico) in 1913 (Rodriguez-Sedano  
58 et al., 2022), Nevado del Ruiz (Colombia) in 1985 (Voight, 1990), Ruapehu (New Zealand) in 2007  
59 (Lube et al., 2012), and Merapi (Indonesia) in 2011 (Jenkins et al., 2015).

60 According to Rodolfo (2000), Sulpizio et al. (2006), and Vallance and Iverson (2015), volcanoclastic  
61 mass flows can be generated at variably ~~long~~ time intervals, spanning from eruptive ~~on~~ to post-  
62 eruptive phases of tens to hundreds of years. In case ~~these~~ seey flows are directly related to volcanic  
63 eruptions ~~(i.e., that is occurring~~ during or shortly after the eruptive event), lahars are defined as syn-  
64 eruptive, and can represent an important multihazard factor in the short ~~to~~ middle term for  
65 perivolcanic areas (Rodolfo, 2000; Sulpizio et al., 2006). ~~On the other hand~~ Instead, in case they are  
66 unrelated to any eruption dynamics, ~~so~~ that is occurring during long periods of volcanic quiescence,  
67 they are defined as post ~~or inter~~ eruptive (Vallance and Iverson, 2015), and can represent a long-  
68 term hazard factor (e.g., Siebe et al., 1999; Pareschi et al., 2002; Zanchetta et al., 2004a, 2004b;  
69 Sulpizio et al., 2006). Usually, ~~these latter~~ post-eruptive lahars are not accounted for ~~in the~~  
70 assessmenting of volcanic hazard, although their study is important for hydrogeological hazard  
71 assessment and long-term territorial planning.

72 In this sense, ~~i.e. that is~~ from the hazard assessment point of view, one of the priorities concerns the  
73 assessment of those areas potentially exposed to such a threat, taking into account the temporal

74 recurrences of the phenomena (~~during over~~ days to months after an eruption, or years to decades after)  
75 and ~~the~~ physical features of the volcanoclastic mass flows (volume, thickness, velocity, dynamic  
76 pressure, concentration, and invasion areas). We stress the fact that the definition of syn-eruptive  
77 lahars (Sulpizio et al., 2006; Vallance and Iverson, 2015) adopted in the present work is important  
78 when accounting for the multihazard of explosive eruptions, which in areas like Vesuvius and  
79 surroundings should not be neglected for its assessment and mapping purposes (de' Michieli Vitturi  
80 et al., this issue; Sandri et al., this issue). The methodology used in this work is geological (see Section  
81 3.2), and the syn-eruptive definition of lahars is necessary to avoid underestimations of the volcanic  
82 hazard from sub-Plinian eruptions at Vesuvius.

83 A lot of the existing literature analyzed the hazard related with volcanoclastic mass flows on the flanks  
84 of active volcanoes, through the reconstruction of historical and prehistoric events (e.g., Scott, 1989;  
85 Scott et al., 1995; Vallance and Scott, 1997; Zaragoza et al., 2020), by using empirical relationships  
86 or physical models (e.g., Macedonio and Pareschi, 1992; Costa, 1997; Iverson et al., 2000; Walsh et  
87 al., 2020). However, the areas affected by these phenomena can be extended well beyond the  
88 boundaries of the volcanic complex, also including the surrounding plains and the downwind-lying  
89 mountainous areas, which are subjected to tephra fallout sometimes even at great distances from the  
90 volcano (e.g., Siebe et al., 1999; Pareschi et al., 2000, 2002; Zanchetta et al., 2004a, 2004b; Di  
91 Crescenzo and Santo, 2005). In these areas, volcanoclastic mass flows may cause victims and  
92 damages, even where considered safe or scarcely affected by other volcanic hazards.

93 In this paper, we present the results of a multidisciplinary study, including geomorphological,  
94 stratigraphic, sedimentological and rock magnetic investigations, as well as impact parameter  
95 calculations by reverse engineering from the deposits. These investigations followed several  
96 surveying campaigns carried out in natural exposures, archaeological excavations, and trenches dug  
97 specifically for this purpose in the plain surrounding the Vesuvius edifice and along the Apennine  
98 valleys (Fig. 1). One of the goals of ~~the this~~ study is to show the presence of lahar deposits even in  
99 areas several km very far from both the source areas of the Apennine hills and ~~the valleys of~~ Somma-



100 Vesuvius edifice, demonstrating the high mobility of these flows. Indeed, these two areas acted as  
101 source areas because they ~~been~~ were largely affected by deposition of primary pyroclastic deposits  
102 from Plinian and sub-Plinian Somma-Vesuvius eruptions. ~~Technically, the ones descending on the~~  
103 Apennine flanks should be termed as volcanielastic debris flows; here we merge into an only one  
104 term, lahars, to indicate secondary mass flows strictly related to specific eruptions. The study of the  
105 past lahar deposits has been useful for the understanding of the feeding drainage basins ~~for different~~  
106 ~~types of volcanielastic mass flows~~, their extent and facies variations with distance from the source  
107 area, and their associated environmental impact on landscape. As already pointed out by Di Vito et  
108 al. (2013, 2019), in the past 4.5 ka repeated lahar and flooding episodes related to the main eruptions  
109 of Somma-Vesuvius and Campi Flegrei volcanoes strongly stroke the Campanian Plain and its human  
110 settlements, influencing their partial or total abandonment ~~or evidencing attempts of resettlement~~. In  
111 particular, for the areas around Vesuvius, these phenomena included: i) large volume and high energy  
112 lahars, originated from the volcanic edifice, which affected the volcanic apron; ii) large flooding  
113 phenomena, i.e. overflowing of water affecting the Campanian plain; iii) lahars originated from the  
114 perivolcanic mountains that affected the Apennine valleys, and invaded the areas of the plain at their  
115 mouths. All of these phenomena differed to each other in terms of amount and grain-size of the  
116 involved sediment. The data and pieces of information described here were the basis for validating a  
117 new model for lahar transport (de' Michieli Vitturi et al., submitted this issue), which was applied for  
118 assessing the related hazard at Vesuvius and Campanian Plain (Sandri et al., submitted this issue).

119 The structure of the work consists of an integrated geological, geomorphological, stratigraphic and  
120 sedimentological ~~integrated~~ study, a paleomagnetic and sediment-mechanic impact assessment  
121 calculation, and a comprehensive discussion on the lahar problem in the Campanian Plain.

122

## 123 **2. Geological setting**

124 The study area is part of the Campanian Plain, which includes the lowlands surrounding Mount  
125 Vesuvius volcano and the nearby Apennine ridges and valleys (Fig. 1). The orography of the area is  
126 characterized by three WNW-ESE trending mountain ridges that border eastward the plain, with an  
127 elevation ranging from 500 to 1600 m a.s.l., and slope angles from 30 to 60°. From north to south,  
128 the Avella-Partenio, Lauro-Visciano and Sarno-Quindici mountain ridges are separated by two  
129 depressions: the Avella-Baiano Valley, in which the alluvial plain of the Clanio river occurs, and  
130 the Lauro valley. Both are narrow valleys that widen toward north-west, among the cities of Cicciano,  
131 Nola and Palma Campania (Fig. 1). The reliefs are characterized by a high drainage density,  
132 associated with a poorly developed and torrential hydrographic network, which over time has favored  
133 the incision and dismantling of the pyroclastic cover on the ridges, and the development of numerous  
134 detrital conoids that connect with the main valley floor (Di Vito et al., 1998).

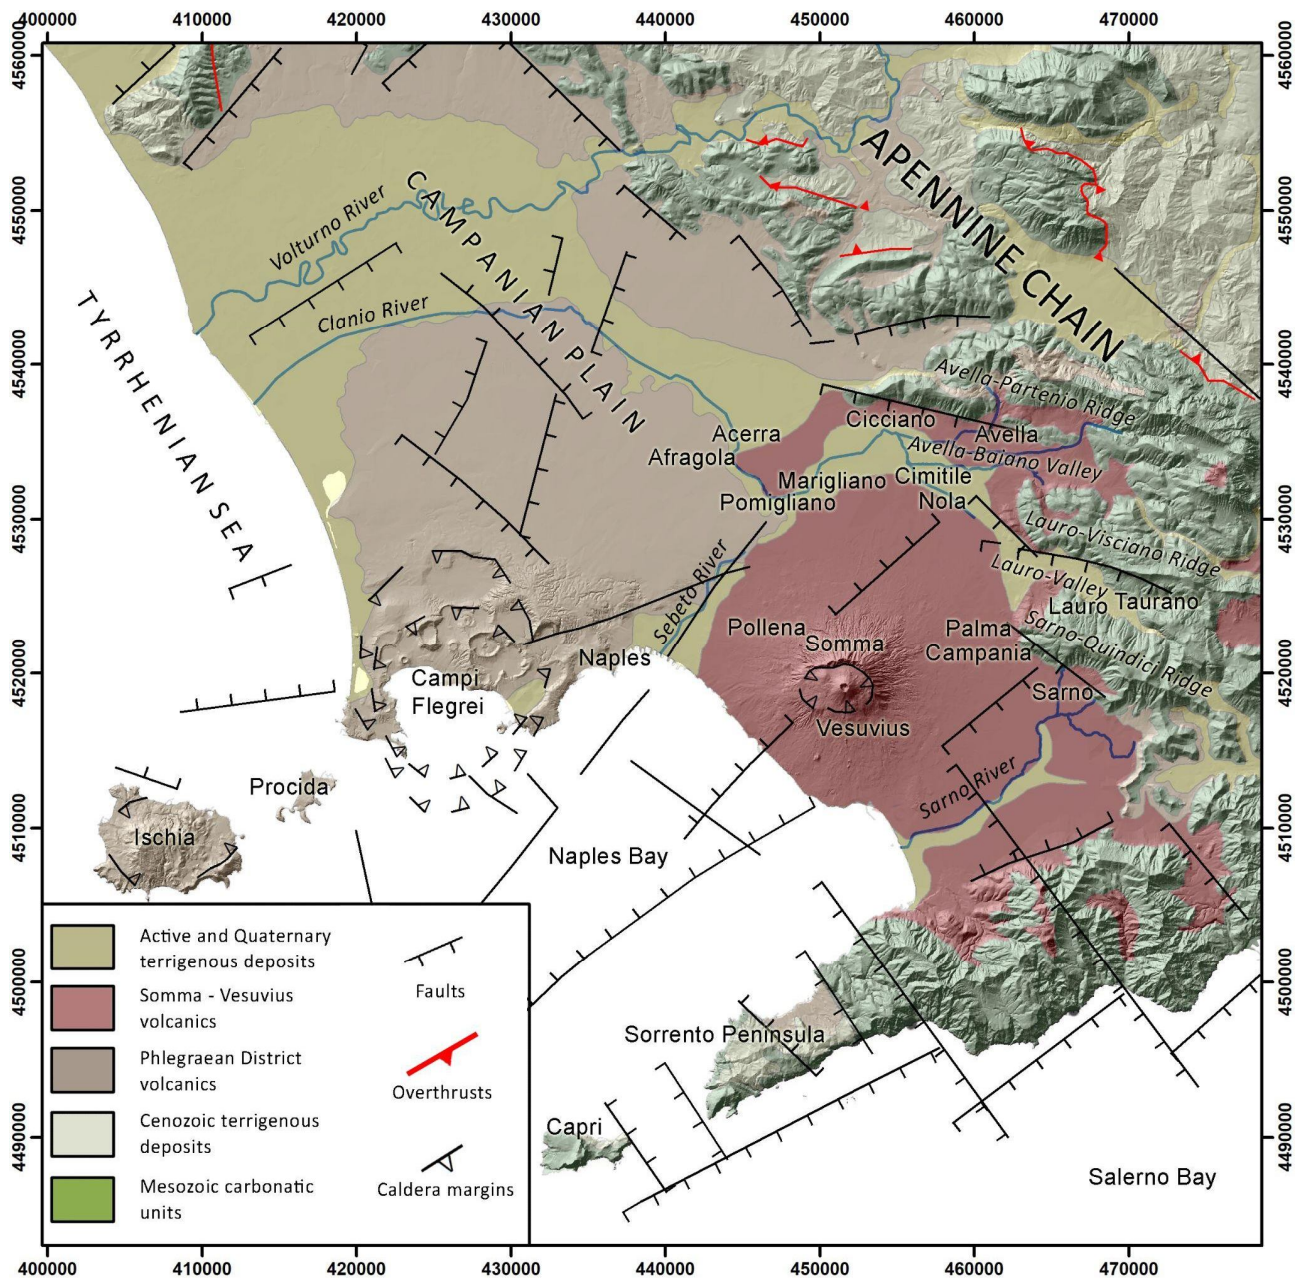

135  
 136 Fig. 1. Geological and structural sketch of the Campania Region on a Shaded Relief derived from TIN ITALY DEM. The  
 137 coordinates are expressed in WGS 84 UTM N33 (modified after Orsi- et al., 1996).

138  
 139 [Vesuvius, or more properly Mt. Somma-Vesuvius, is a composite central volcano less than 39,000](#)  
 140 [years old, composed of the remnant of the oldest Mt. Somma edifice, dismantled by repeated episodes](#)  
 141 [of caldera collapse, and the more recent Mt. Vesuvius, grown inside it. Its volcanic history is](#)  
 142 [characterized by an initial phase, dominated by low-energy effusive and explosive eruptions, which](#)  
 143 [ended at around 22,000 years ago. Since then, the volcano generated four Plinian eruptions with VEI](#)

144 5-6, each preceded by long periods of quiescence and all accompanied by a summit caldera collapse  
145 (Somma caldera; Cioni et al., 1999). The last Plinian eruption occurred in 79 CE and once again  
146 modified the Somma caldera, inside which the recent cone has subsequently grown due to an  
147 alternation of periods of open conduit, persistent Strombolian and effusive activity, and long periods  
148 of quiescence with obstructed conduit, interrupted by high-energy sub-Plinian eruptions. In historical  
149 times, the other more energetic events were the sub-Plinian ‘Pollena’ (472 CE) and 1631 eruptions  
150 (Santacroce et al., 2008). The last eruption occurred in 1944 and caused the return to obstructed  
151 conduit conditions, which characterize the current quiescent phase of the volcano. The rocks  
152 composition varies from slightly silica-undersaturated (K-basalt to K-trachyte) to highly silica-  
153 undersaturated (K-tephrite to K-phonolite). The Somma-Vesuvius complex is characterized by  
154 ~~Mount Vesuvius is a composite central volcano with~~ a well-developed radial drainage network, which  
155 feeds an extensive volcanoclastic apron that morphologically connects the edifice with the  
156 surrounding plain (Santacroce et al., 2003). It represents the active southern termination of the Plio-  
157 Quaternary volcanic chain that borders the eastern Tyrrhenian margin (Peccerillo, 2003). Volcanism  
158 in this margin is related to the extensional tectonic phases that accompanied the anticlockwise rotation  
159 of the Italian peninsula, during the complex interaction between the Africa and Eurasian plates, which  
160 generated the Apennine thrust-and-fold belt (Ippolito et al., 1973; D’Argenio et al., 1973; Finetti and  
161 Morelli, 1974; Bartole, 1984; Piochi et al., 2004; Patacca and Scandone, 2007; Vitale and Ciarcia,  
162 2018). The extension along the Tyrrhenian margin of the Apennine chain was accommodated by the  
163 activation of NW-SE normal faults and NE-SW normal to strike-slip transfer fault systems, which  
164 dismembered the chain in horst and graben structures, and allowed magmas to reach the surface and  
165 feed the volcanism (Mariani and Prato, 1988; Faccenna et al., 1994; Acocella and Funicello, 2006).  
166 The Campanian Plain is one of these grabens that hosts the Neapolitan volcanic area. It is a NW-SE  
167 elongated structural depression, filled by a thick sequence of marine and continental sedimentary  
168 deposits, and volcanic-volcanoclastic successions that compensated its subsidence, leading to a  
169 complete emersion at around 39 ka (Brocchini et al., 2001; De Vivo et al., 2001; Santangelo et al.,

170 2017). This graben is bordered toward NW, NE and SE by the Meso-Cenozoic carbonate and  
171 terrigenous successions of the Apennine chain, and is subdivided in minor NE-SW oriented horst-  
172 and-graben structures (Carrara et al., 1973; Finetti and Morelli, 1974; Fedi and Rapolla, 1987;  
173 Brancaccio et al., 1991). Neapolitan volcanoes lie on these second-order structural highs (Marotta et  
174 al., 2022 and reference therein), and the products of their most powerful eruptions blanketed the  
175 Apennine reliefs and filled their valleys with several meter-thick covers of ~~loose~~ pyroclastic fall  
176 deposits, composed ~~of by of~~ pumice lapilli and ash layers separated by paleosoils (Pareschi et al.,  
177 2002; Bisson et al., 2007; Cinque and Robustelli, 2009; Gurioli et al., 2010).

178 In terms of water drainage ~~of the water~~, the pyroclastic cover has peculiar geotechnical characteristics,  
179 such as a positive correlation between grain-size and permeability, which enabled the development  
180 of lahars in the area. In particular, coarser pumice layers are characterized by interconnected  
181 ~~inner~~ inter-clast void spaces that control water accumulation, instead ash layers, soils and paleosoils  
182 by a high water retention capacity (Andosol-like soils), so that the differential behavior can regulate  
183 equilibrium among deposits stability vs. remobilization (Fiorillo and Wilson, 2004).

184 Regarding the volcanic activity of Vesuvius in the last 2,000 years, the largest eruptions after the 79  
185 CE Plinian one were two sub-Plinian eruptions, the 472 CE Pollena and 1631 ones, but several other  
186 effusive and explosive events ~~frequently~~ occurred in historical times. In the Campanian Plain, lahar  
187 deposits related to these two eruptions are quite abundant due to past heavy rains (Fiorillo and Wilson,  
188 2004; Zanchetta et al., 2004b; Stanzione et al., 2023), also the sub-Plinian scenario is of interest for  
189 civil protection purposes, which is why in the present work we focus on these ~~reference explosive~~ 472  
190 CE Pollena and 1631 eruptions. ~~Throughout the work, a~~ particular attention is ~~put given on to the~~  
191 distribution of the primary pyroclastic deposits and ~~the~~ related syn-eruptive lahars, which are mass  
192 flow events strictly directly related to specific eruptions, even if the condition is not necessarily that  
193 of an event contemporaneous to the eruption; ~~†~~ Those deposits are mainly composed by of >90%  
194 fragments from the parental eruption, while the remaining fragments pertain to other eruptions mixed  
195 by volcaniclastic colluvium (Sulpizio et al., 2006). The syn-eruptive feature is thus related to the



196 ~~involvement~~ remobilization of pyroclastic deposits more than to the exact timing of lahar  
197 emplacement, the latter being of the order of max a few years (before ~~significant~~ humification  
198 processes or significant human activities can occur). Such a feature distinction is important because  
199 directly related to volcanic hazard.

## 201 **3. Materials and methods**

### 202 **3.1. Evidence from historical sources**

203 We collected data from historical sources, maps, documents, and newspapers to supplement the  
204 geological data, gathered directly or indirectly, for the definition of the areal distribution of the syn-  
205 eruptive and post-eruptive lahar deposits at Vesuvius and in the surrounding region. Such collection  
206 concerned the phenomena that took place starting from the sixteenth century CE to 2005. This time  
207 span has been chosen depending on data availability, and to show the high recurrence of events over  
208 time in the area. The data were collected and grouped not only by years but also by the municipal  
209 areas existing at those times. It should be noted that the distribution of the data can be affected by the  
210 different urbanization over time, and by the presence of damage to people, things infrastructures and  
211 goods, economic activities and settlements. In the absence of local instrumental  
212 meteorological weather data series, ~~corresponding to over~~ the analyzed period, we assumed that the  
213 phenomena of remobilization of the pyroclastic deposits, and the consequent generation of large  
214 alluvial flooding events and volcanoclastic mass flows, coincided with extreme weather events often  
215 described and reported in the analyzed sources. ~~The reports reach a quite significant number,~~  
216 ~~approximately 500, and concern 97 municipalities~~ We identified about 500 individual reports,  
217 covering events between the sixteenth century CE and 2005 that took place in 97 different  
218 municipalities. The data were organized in a geospatial database, so that it was possible to define  
219 different areas affected by frequent syn-eruptive floods and lahars, concomitant/related with the sub-  
220 Plinian eruption of 1631, to be used as benchmark for the main geological analyses. ~~With reference~~

221 ~~to~~ We could not add the Pollena eruption to this historical data set, as there are no historical-available  
 222 sources for similar occurrences other than documents deriving from archaeological excavations  
 223 activities (see next sections).  
 224 The municipalities with the highest number of reports are: Sarno (43), Salerno (32), Siano (26), Vietri  
 225 sul Mare (22), Bracigliano (21), Nocera Inferiore (20), Maiori (19), Quindici (17) (Fig. 1). The events  
 226 of greatest intensity, which affected more than five municipal territories at the same time, are 19; ~~they~~  
 227 ~~likely were multiple soil slip debris flows~~. Some of these occurrences result closely connected with  
 228 the volcanic events of Vesuvius, such as those that occurred in 1631, 1823, 1910, 1949 and 1954,  
 229 simultaneously or within months to a few years after the Vesuvius eruptions of 1631, 1822, 1906 and  
 230 1944.

| <u>Eruption</u>      | <u>Lahar/Intense Alluvial Event</u> | <u>Municipalities affected</u>                                                                                                                                                                                                                                                             |
|----------------------|-------------------------------------|--------------------------------------------------------------------------------------------------------------------------------------------------------------------------------------------------------------------------------------------------------------------------------------------|
| <u>December 1631</u> | <u>16/12/1631</u>                   | <u>Sant'Anastasia, San Giorgio a Cremano, Massa di Somma, Somma, Ottaviano, San Sebastiano, Trocchia, Torre del Greco, Portici, Pugliano, Madonna dell'Arco, Palma, Nola Arpaia, Arienzo, Cicciano, Marigliano, Benevento, Avellino</u>                                                    |
| <u>October 1822</u>  | <u>24/01/1823</u>                   | <u>Amalfi, Bracigliano, Cava de' Tirreni, Cetara, Minori, Nocera Inferiore, Pagani, Salerno, Sant'Egidio del Monte Albino, Tramonti, Vietri sul Mare</u>                                                                                                                                   |
|                      | <u>12/02/1823</u>                   | <u>Maiori</u>                                                                                                                                                                                                                                                                              |
|                      | <u>12/04/1823</u>                   | <u>Sarno</u>                                                                                                                                                                                                                                                                               |
|                      | <u>18/10/1823</u>                   | <u>Corbara, Praiano, Sant'Egidio del Monte Albino, Sarno, Siano</u>                                                                                                                                                                                                                        |
|                      | <u>15/11/1823</u>                   | <u>Salerno</u>                                                                                                                                                                                                                                                                             |
| <u>April 1906</u>    | <u>24/10/1910</u>                   | <u>Amalfi, Boscotrecase, Cercola, Cetara, Ercolano, Giffoni Valle Piana, Maiori, Marano di Napoli, Minori, Napoli, Pollena Trocchia, Torre del Greco, Vico Equense, Vietri sul Mare, Sant'Anastasia, San Giorgio a Cremano, Sarno, Scala, Pomigliano d'Arco, Portici, Ravello, Salerno</u> |
| <u>March 1944</u>    | <u>02/10/1949</u>                   | <u>Lauro, Maiori, Minori Nocera Inferiore, Sarno, Vietri sul Mare</u>                                                                                                                                                                                                                      |
|                      | <u>25/10/1954</u>                   | <u>Cava de' Tirreni, Maiori, Minori, Nocera Inferiore, Salerno, Tramonti, Vietri sul Mare</u>                                                                                                                                                                                              |

231 [Tab. 1. Historical archive of lahar and alluvial events related to the four most significant Vesuvius eruption in the last](#)  
232 [four centuries, and municipalities affected by such events.](#)

233 The absence of information in the Lauro and Avella-Baiano ~~v~~Valleys is likely due to the absence of  
234 detailed descriptions of alluvial events, or most likely to the position of the inhabited areas generally  
235 located on the hills thus far from the lower part of the valleys. [The investigated area ~~has been~~was](#)  
236 [affected many times by post-eruptive lahars events due to the presence of thick variable~~y~~-weathered](#)  
237 [pyroclastic deposits mantling the steep slopes of Somma-Vesuvius and Apennines. One of the most](#)  
238 [recent event occurred on May 5<sup>th</sup> 1998, when a 16-hours prolonged heavy rainfall triggered a huge](#)  
239 [number of Apennine slope failures towards the towns of Quindici, Bracigliano, Siano, Sarno and San](#)  
240 [Felice a Cancellò, all located near the Apennine ridges east-northeast of Somma-Vesuvius \(Fig. 1\).](#)  
241 [This catastrophic events involved an extension area of around 60 km<sup>2</sup>, and a volume of more than](#)  
242 [2,000,000 2x10<sup>6</sup> m<sup>3</sup> \(40% derived from the materials eroded along the channels\), leading to causing](#)  
243 [160 victims and huge severe damages to the quoted towns \(Di Vito et al., 2019 and references therein\).](#)

244

### 245 **3.2. Field and archaeological investigations**

246 We used a set of geological, stratigraphical, sedimentological, archaeological, and pedological  
247 information for the reconstruction of the type of events, their emplacement mechanisms, timing, and  
248 impact on pre-existing structures/environment. Such an approach enabled us to cross-check  
249 geological and archaeological evidence allowing us to accurately fix the age of events. Conversely,  
250 the presence of well-dated primary pyroclastic deposits can define the age of human traces otherwise  
251 not easily datable. Furthermore, the identification of the “primary” (fallout and pyroclastic current,  
252 along with the archeological findings) can give the absolute age (*ante* or *post quem*) of a given deposit.  
253 The definition of isochronic paleosurfaces can also contribute to the reconstruction of the paleo-  
254 environments affected by the deposition, and of the variations that occurred during depositional  
255 processes. For this purpose, particular attention was paid to the basal contacts between the deposits.



256 In some areas like Nola (10-15 km from Apennine source valleys), the lahar deposits directly overlie  
257 the primary pyroclastic deposits (~~of (both for the 472 CE Pollena or and 1631 eruption)~~), while in  
258 other ~~eases-areas~~ some pyroclastic units or the whole primary deposits are missing (eroded) or  
259 lacking. Only the correlation with the nearby areas ~~P~~permitted to define whether the emplacement of  
260 the ~~secondary deposits~~lahars eroded partly or ~~entirely significantly~~ the underlain primary deposits,  
261 vice versa the complete absence in the emplacement areas ~~was could also be “simply”~~ due to their  
262 distribution of these latter. The analysis of the internal structure marked by sharp changes in grain  
263 sizes, color, presence of ~~erosive-erosional~~ unconformities, or interposition of lenses of coarser  
264 material also permitted the identification of one or more flow units within the same individual deposit  
265 package. The macroscopic characteristics of the sequences permitted some inferences on the transport  
266 and depositional mechanisms, while the grain-size and componentry ~~analysis-analyses~~ provided  
267 information ~~of-on~~ the source deposits that were remobilized. This brings to another important  
268 definition, that is syn-eruptive vs. post-eruptive lahars, according to the definition of Sulpizio et al.  
269 (2006) and Iverson and Vallance (2015), which applies during or ~~respectively~~ soon after the eruption  
270 vs. several years to centuries after the eruption ended, respectively. The macroscopic analysis allowed  
271 us to distinguish between the syn-eruptive and post-eruptive deposits, ~~which. The first ones~~ are  
272 defined by the occurrence of pyroclastic components with ~~homogeneous a~~ lithology, similar to the  
273 one of the primary deposits, ~~and the post (or inter) eruptive deposits.~~ The second ones are  
274 characterized by some evidence of depositional stasis, ~~such as like~~ humified paleosurfaces, ~~evidene~~  
275 below the lahar deposits or of ~~anthropic-anthropogenic~~ activities, or ~~also through deposits that~~  
276 contain by the presence of humified material and/or fragments of older eruptions in the  
277 deposits ~~following the progressive erosion within the feeding slopes and valleys~~. All these  
278 characteristics allowed the correlation between the various volcanoclastic units for the whole set of  
279 the studied sequences, marking the differences needed to hypothesize on the source and invasion  
280 areas.

281 We reviewed all the volcanological and archaeological data collected during the last 20 years from  
282 drill cores, outcrops, archaeological excavations, and from the existing literature, in collaboration  
283 with colleagues of the Archaeological Superintendence of Campania region. The preliminary  
284 collection and analysis of the existing data permitted to plan a hundred of new stratigraphic trenches  
285 (Fig. 2), with the aim of collecting stratigraphic, ~~stratimetric~~, sedimentological, lithological and  
286 chronological data on the ~~sequences both of~~ primary pyroclastic and secondary (lahar) deposits.  
287 Particular attention was also paid to the ~~primary pyroclastic deposits and to syn- and post-eruptive~~  
288 ~~lahars, and to their~~ geometric relations of these deposits with the paleotopography and ~~the~~ preexisting  
289 ~~anthropic-anthropogenic~~ structures.

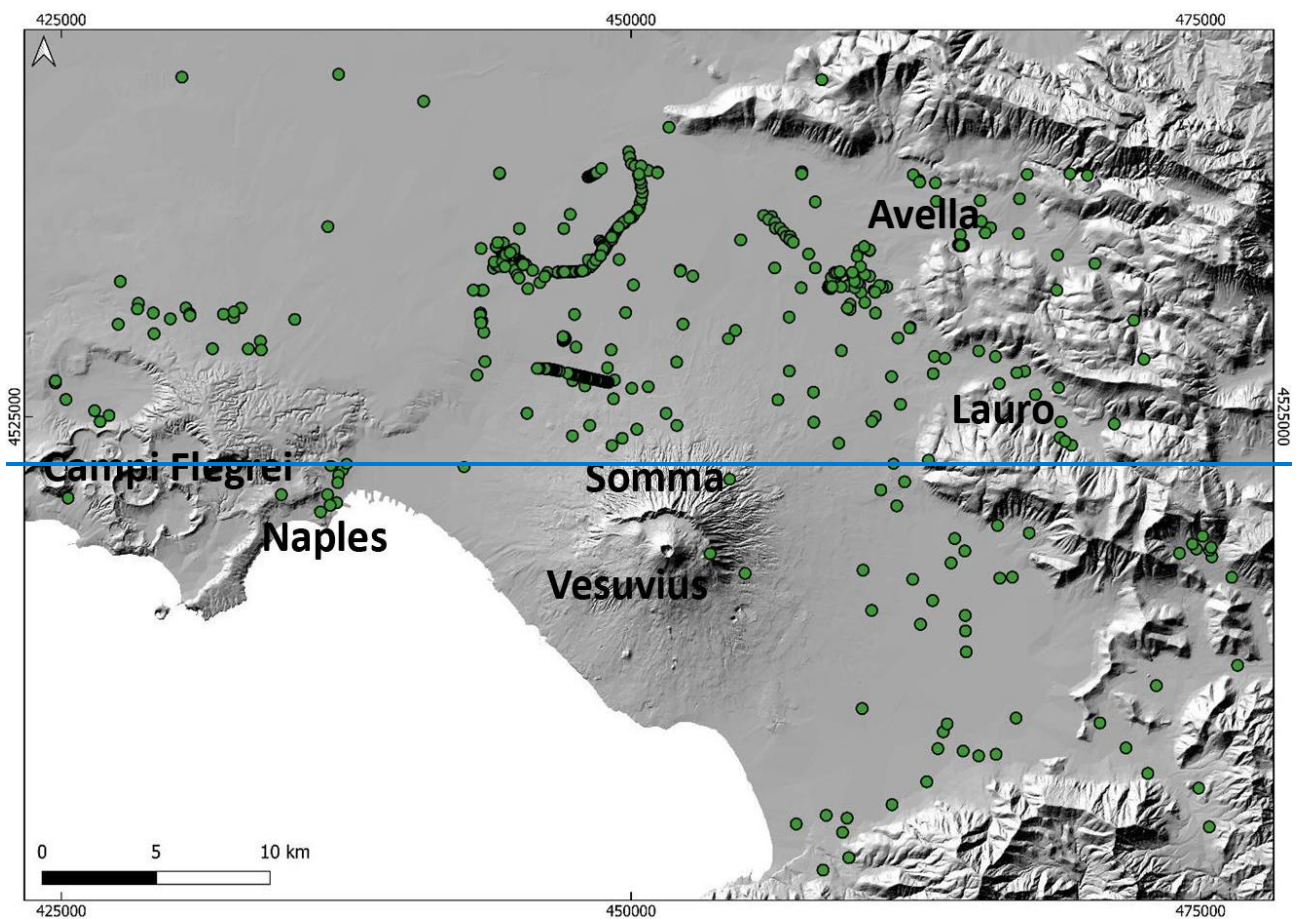

290

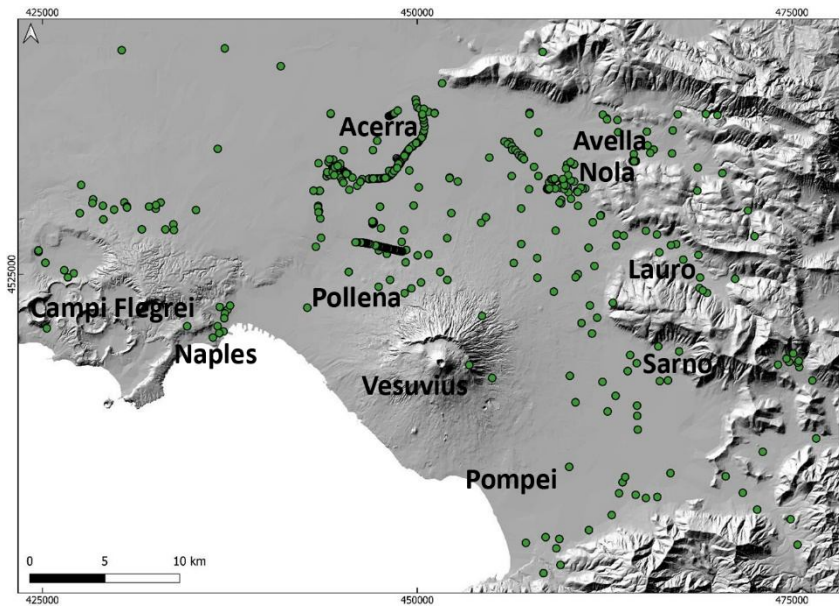

291

292 Fig. 2. Shaded relief of the studied area and location of all the sites where stratigraphic analyses were carried out.

293

294 The collected data were organized into a geospatial database (QGIS Platform), in which each point  
 295 represents an investigated site linked to a series of information, such as the precise location, ~~the~~  
 296 kindtype of volcanic sequence, and ~~the stratimetrie~~stratigraphic features (primary and secondary  
 297 units, thickness, type of deposit, etc...). The data were visualized using a Digital Elevation Model  
 298 (DEM) of the Campanian Plain as reference topography and the UTM WGS 84 – Zone 33N reference  
 299 projection.

300

### 301 3.3. Geomorphological analysis

302 This analysis is aimed at identifying the macro-basins that fed the lahars in the study area after the  
 303 two sub-Plinian eruptions (Pollena and 1631). The analysis was carried out on the basis of the slopes  
 304 distribution and the watersheds extracted from a Digital Elevation Model (DEM). The DEM was  
 305 derived from a LiDAR flight of 2012 ~~and stored with~~ (cell size of 10 m). In particular, six macro-  
 306 basins characterized by slopes  $> 20^\circ$  were identified in the Somma-Vesuvius area, whereas fifteen  
 307 macro-basins with slopes  $> 25^\circ$  were identified in the Apennines to the East of the volcano (Fig. 3).  
 308 The different slopes thresholds are defined starting from previous studies (Pareschi et al., 2000, 2002;



309 see also Bisson et al., 2013, 2014), and on the basis of a better analysis of the physical characteristics  
310 of the remobilized material, in turns related to the various types of deposits. In fact, ~~along the slopes~~  
311 ~~of on the steep slopes and in the valleys of~~ Somma-Vesuvius, ~~they deposits~~ are ~~mainly-mainly~~ ash-  
312 rich pyroclastic current ~~deposits and subordinately lapilli fallout~~ deposits, while ~~for-on~~ the  
313 ~~ApenninesApennines~~ they are ash and lapilli fallout deposits ~~emplaced along the variably deep~~  
314 ~~slopes~~. Each basin was considered as a single feeding unit for the lahars generation, and this is an  
315 input for the modeling of possible future lahars in the companion papers (de' Michieli Vitturi et al.,  
316 ~~submittedthis issue~~; Sandri et al., ~~submittedthis issue~~).

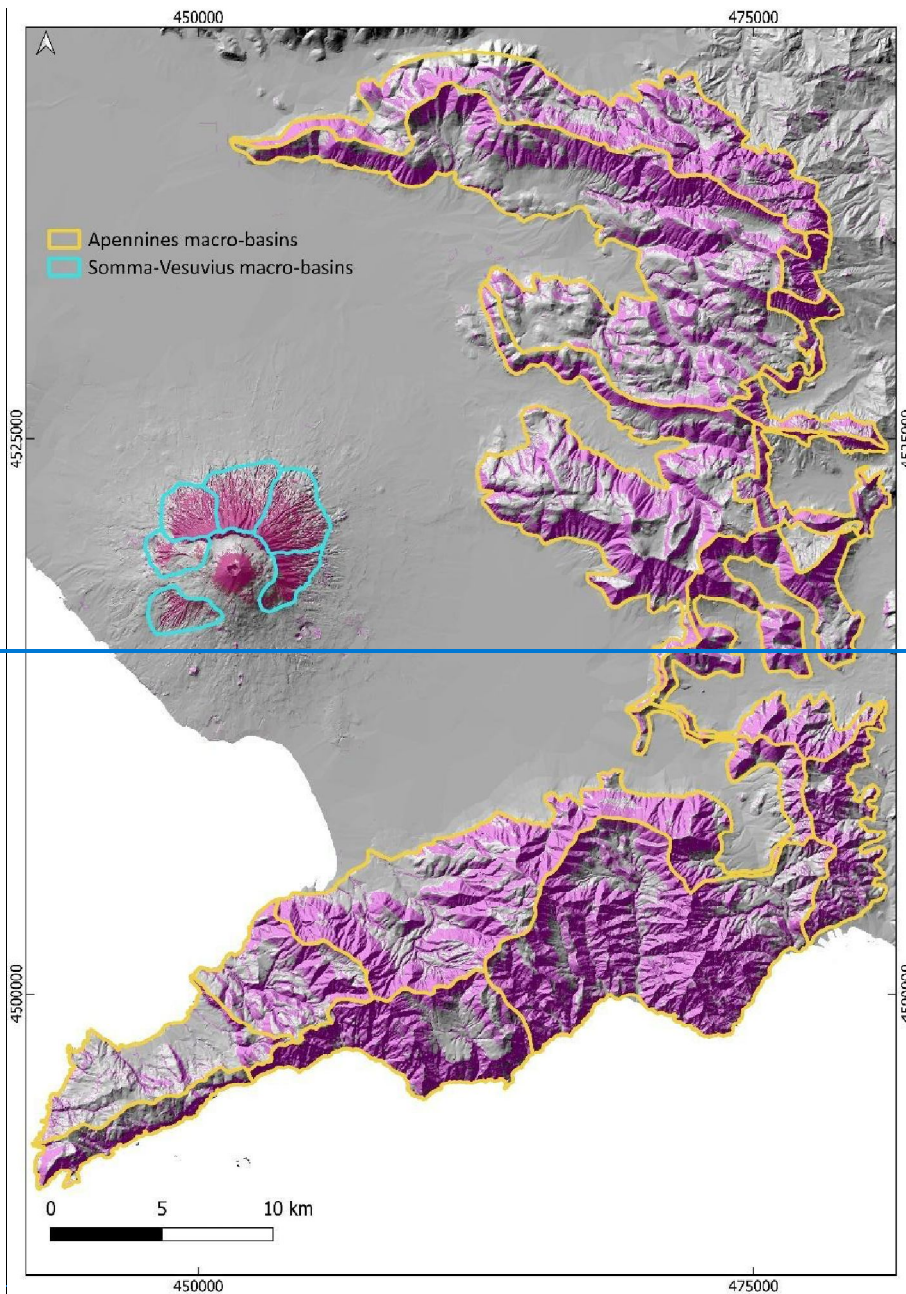

317

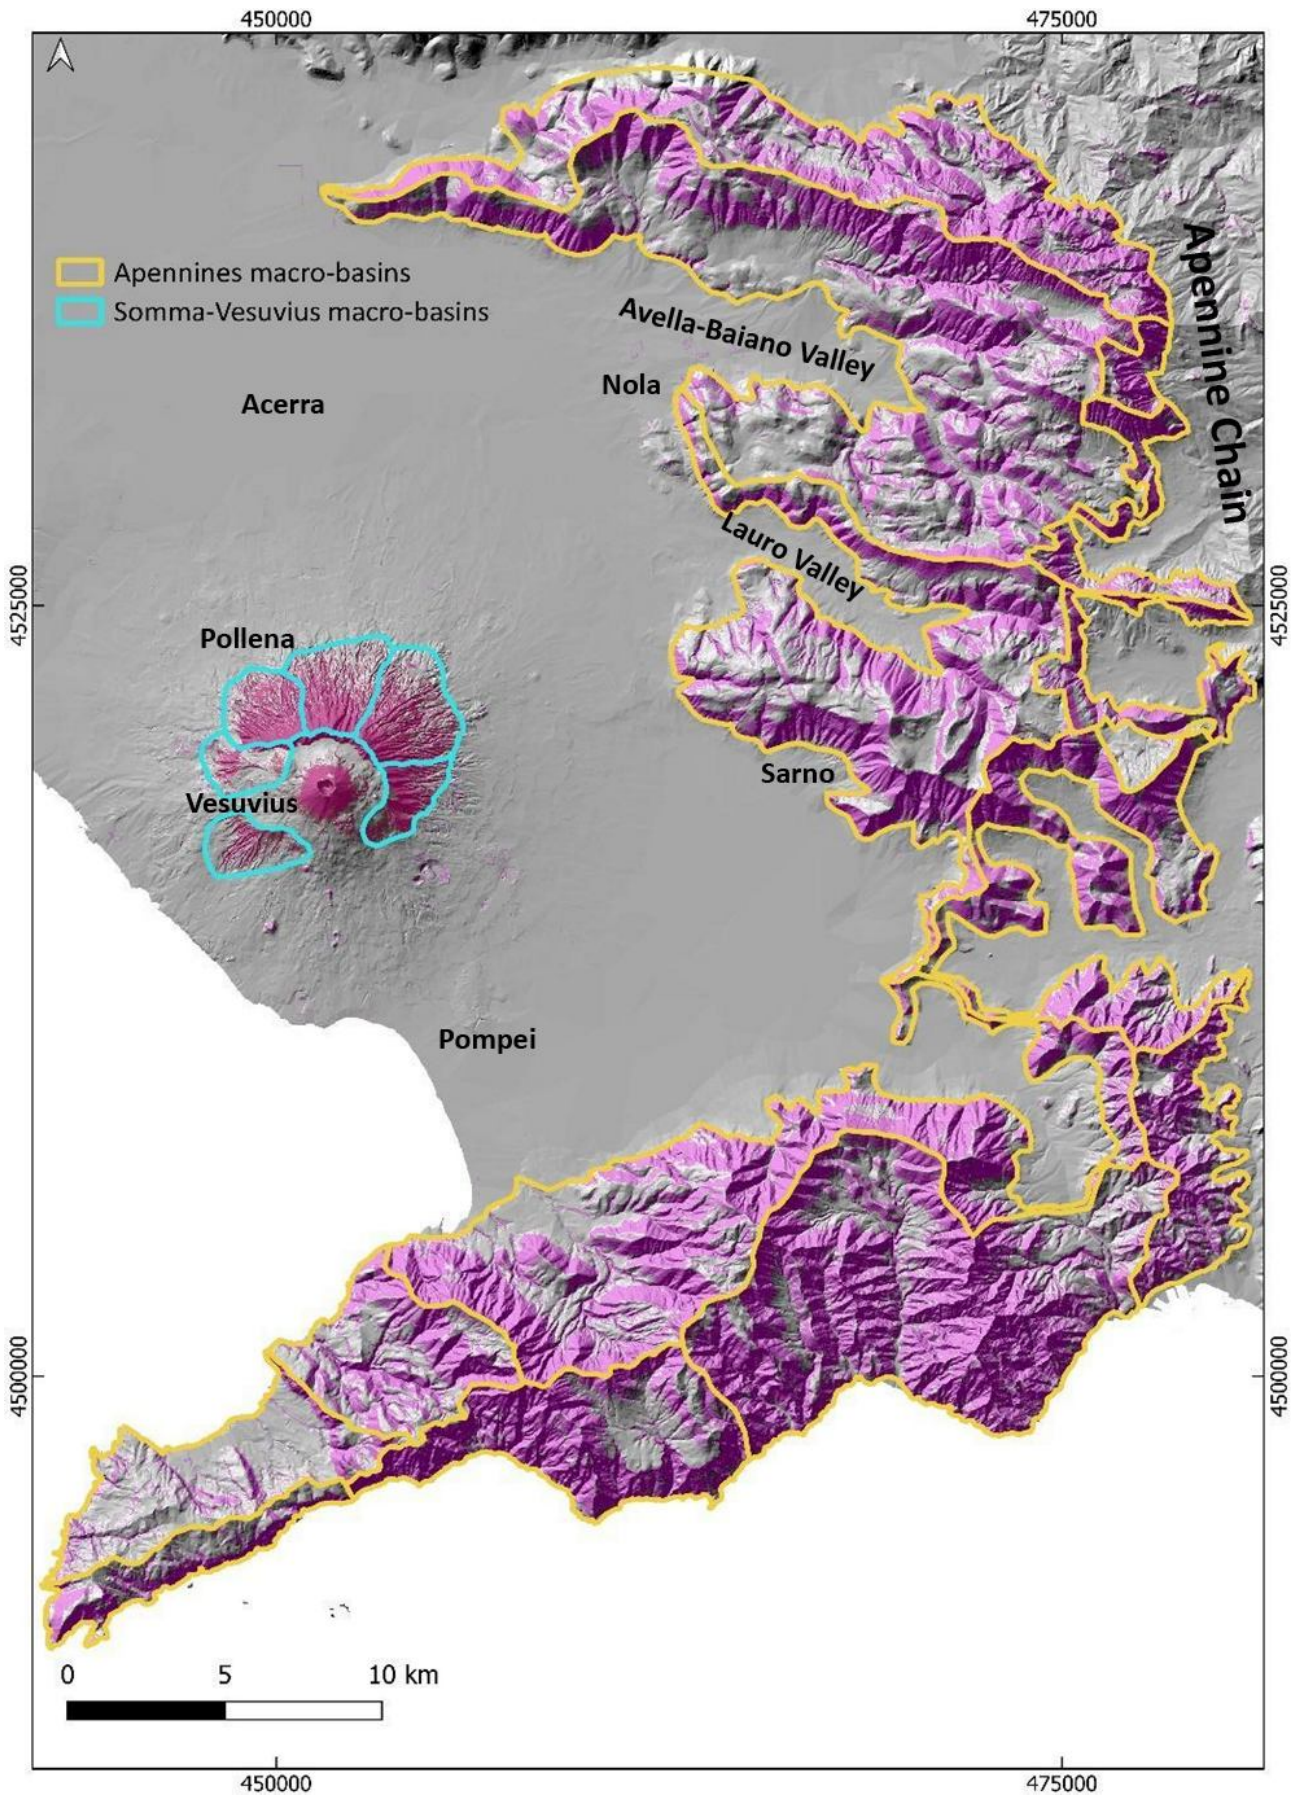



319 Fig. 3. The macro-basins defined on the basis of their geomorphological features to study the areas of possible  
320 accumulation and mobilization of deposits, which are used in modeling lahar generation of future events.

321

### 322 **3.4. Laboratory and analytical work**

#### 323 **3.4.1. Grain-size**

324 In ~~several~~ the selected studied sites among all the studied ones reported in (Fig. 4), macroscopic  
325 ~~analysis-analyses~~ of the stratigraphic sequences ~~was-were first~~ carried out in the field to first identify  
326 any homogeneities or similarities between the juvenile fraction of the primary and secondary deposits,  
327 and then recognize the various volcanoclastic units. This was followed by sampling the deposits and  
328 carrying out the laboratory analyses.

329 In particular, the sampling was mostly made on the syn-eruptive lahar deposits, but also on the post-  
330 eruptive and, in a few cases, on the primary pyroclastic deposits. All lab analyses were performed in  
331 the laboratories of sedimentology and optical microscopy at the Istituto Nazionale di Geofisica e  
332 Vulcanologia, Sezione di Napoli Osservatorio Vesuviano (INGV – OV). The material samples were  
333 pre-heated at a temperature of 60-70 °C to eliminate any fraction of humidity, then were quartered  
334 and sieved. To avoid any breaking of fragile clasts like pumices, the dry sieving of the grain-size  
335 classes between -4 (a coarse limit variable depending on the sample) and 0 phi was made manually,  
336 while for the classes between 0.5 and 5 phi a mechanical sieving apparatus was used.

337 In particular, ~~The the~~ fine ash-rich deposit samples with a high degree of cohesion (with a significant  
338 amount >0 phi) were ~~first combined with~~ diluted in distilled water ~~and thus, then~~ boiled to remove all  
339 ~~the~~ ash aggregates, before being analyzed for granulometry grain-sizes following a wet procedure,  
340 ~~and finally dried and weighted by classes. The cumulative class >5 phi was further separated by~~  
341 ~~interpolation modelling (de'Michieli Vitturi et al., this issue).~~ In the post-processing of the data, the  
342 GRADISTAT excel package by Blott and Pye (2001) was used to determine the main statistical  
343 parameters. On selected samples, a microscopic componentry analysis was performed, consisting of

344 recognizing and separating the various lithotypes that compose the volcanoclastic deposits, that is  
345 juvenile, lithic and crystal clasts. The clasts recognition was made manually for the coarser fractions,  
346 while for the finest fractions it was necessary the use of a reflected-light binocular microscope.

347  
348

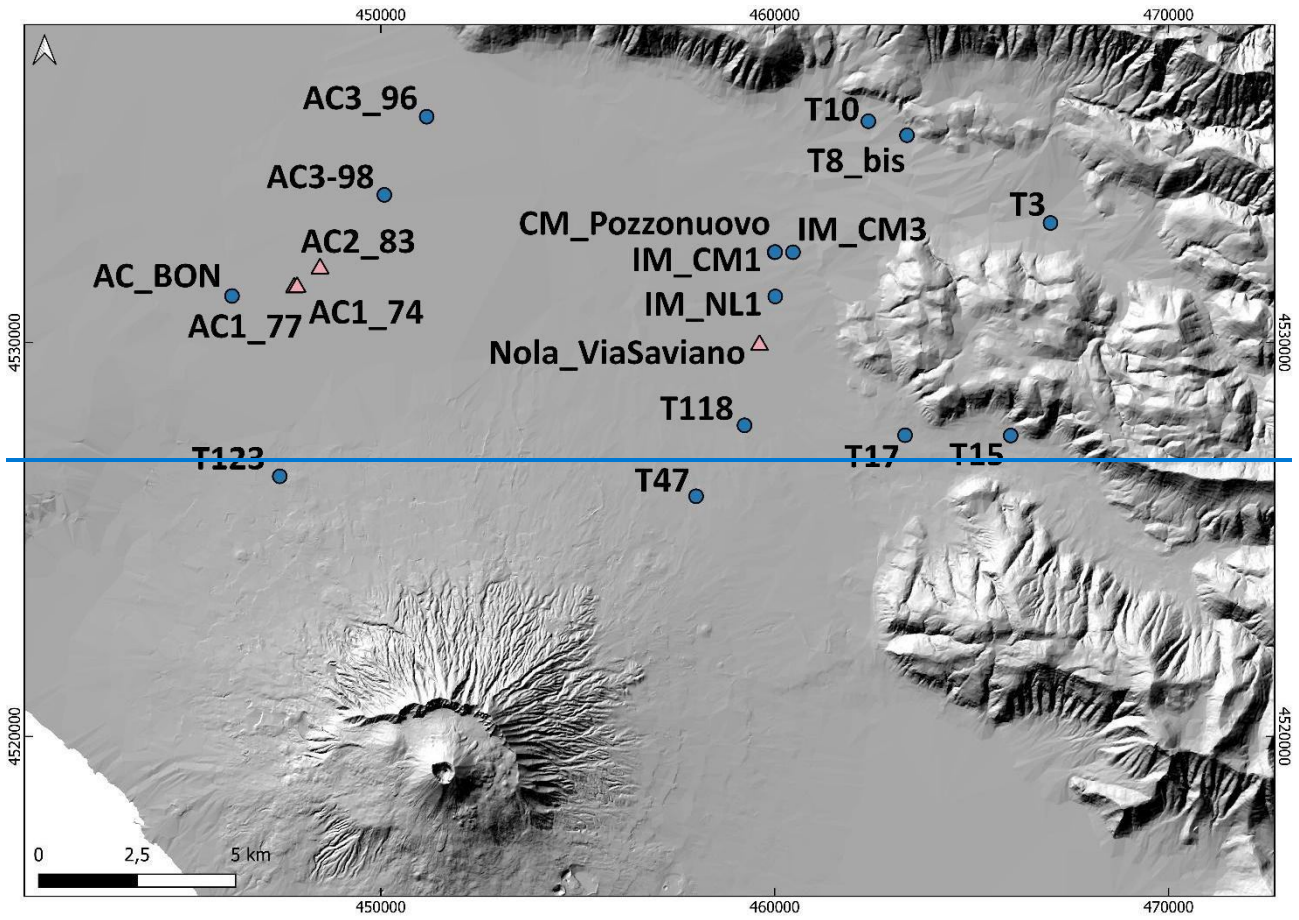

349

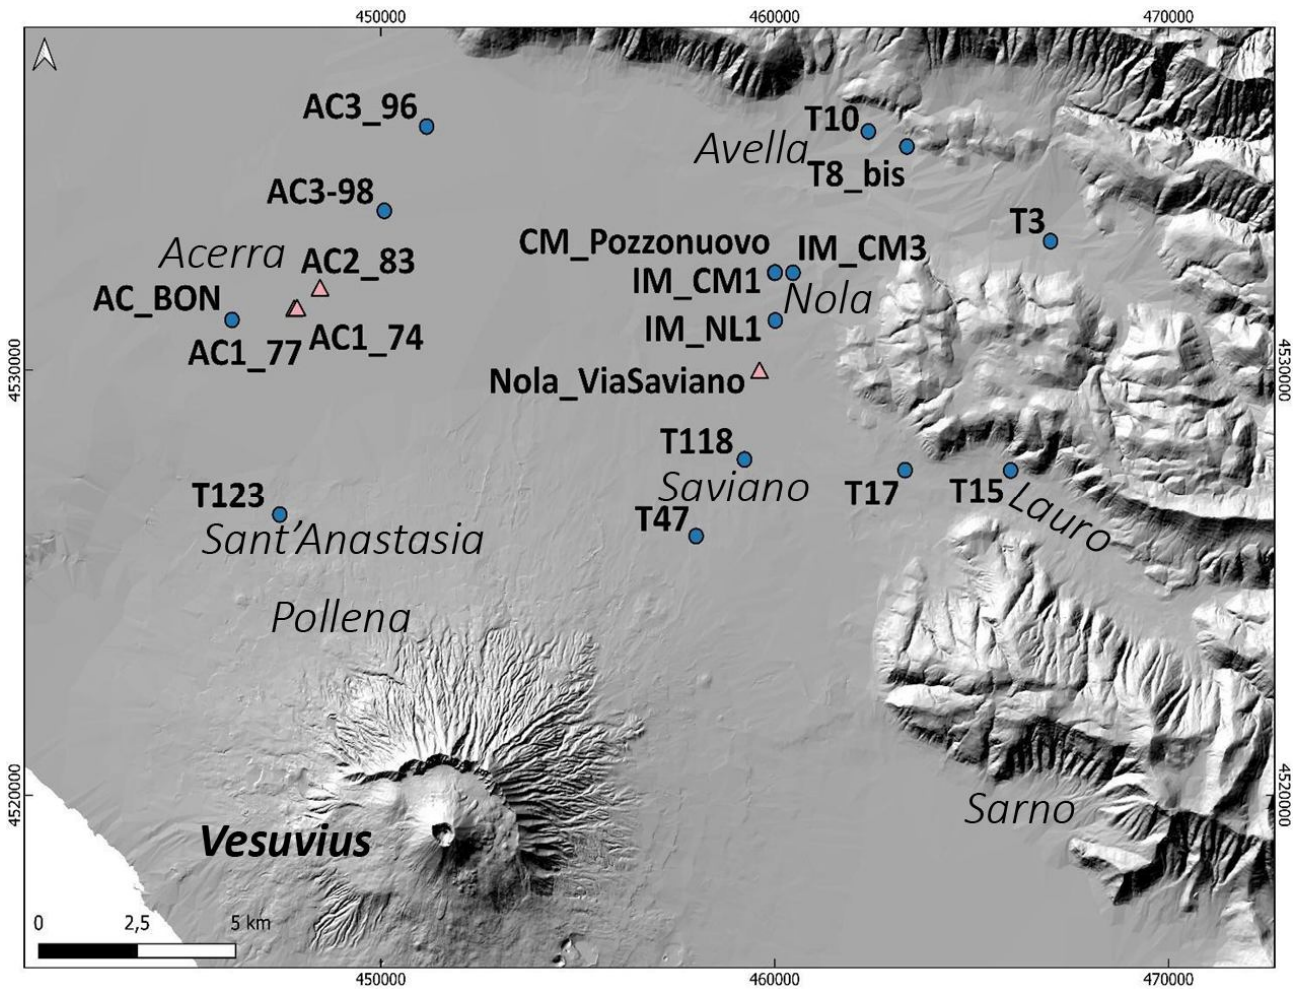

350

351

352

353

354

355

356

Fig. 4. Location of sites in which the sampling was carried out for sedimentological and paleomagnetic analyses. The pink triangles represent the sites for which a paleomagnetic study was carried out ([AC1\\_74](#), [AC1\\_77](#), [AC2\\_83](#), and [Nola\\_Via\\_Saviano](#)). [In several sites, multiple samples were taken at different stratigraphic heights; samples labeled with US were taken at CM\\_Pozzuovo site \(see results\).](#)

### 3.4.2. Input for impact parameters

357

358

359

360

361

A significant number of large clasts and boulders was also found embedded in the ash matrix of the lahar deposits at different locations. These clasts have dimensions from several centimeters to several tens of centimeters in diameter, and their nature is variable, that is limestone, ceramic, brick, tephra, lava, sandstone, iron (in order of abundance). Most of the clasts are fragments of artifacts from buildings, structures, and other archaeological finds of the Roman period, and their shape can be



362 approximated in the field to ellipsoid. All these features suggest that they were entrained from  
363 substrate into the lahars to ultimately be deposited together with the ~~ash~~main finer solid load of the  
364 lahars. In the dynamics of volcanoclastic mass flows like lahars and pyroclastic currents, the  
365 occurrence of boulder entrainment by flow dynamic pressure is recognized as a ~~it is~~ quite common  
366 feature (e.g., Zanchetta et al., 2004a; Pittari et al., 2007; Duller et al., 2008; Toyos et al., 2008; Cas  
367 et al., 2011; Carling, 2013; Doronzo, 2013; Jenkins et al., 2015; Roche, 2015; Martí et al., 2019;  
368 Guzman et al., 2020). The capability of a flow to entrain a clast is a function of flow properties  
369 (velocity, density) and clast properties (dimension, density, shape), and dynamic pressure well  
370 synthesizes and quantifies such capability also in terms of flow hazard (Toyos et al., 2008; Zuccaro and  
371 De Gregorio, 2013; Jenkins et al., 2015). In Appendix ~~1~~A, a theoretical scheme is presented to invert  
372 these field features for calculation of the impact parameters at local scale.

373

### 374 3.4.3. Rock magnetism

375 The lahar deposits related to the Pollena eruption were analyzed by rock magnetism ~~at two~~  
376 ~~localities, in the municipalities of~~ Acerra (12 km from Somma-Vesuvius) and Nola (10-15 km from  
377 10-15 km from Apennine source valleys) ~~at four localities (Fig. 4), where the lahars interacted with~~  
378 ~~anthropogenic structures. At each locality, we collected oriented samples, then measured about 200~~  
379 ~~specimens~~. We sampled both the deposit matrix and some potsherds embedded along three trenches  
380 (74, 77 and 83) and in the “Nola-Via Saviano” excavation ~~(Fig. 4)~~. The purpose of the magnetic  
381 measurements was threefold: i) evaluating the magnetic fabric of the deposits to infer the local to  
382 regional flow directions of the lahars and possibly their origin, whether from the Apennines or ~~from~~  
383 Vesuvius. The magnetic fabric in this type of deposits records the main flow direction (local/regional)  
384 followed during the emplacement processes; ii) estimating the deposition temperature ( $T_{dep}$ ) of the  
385 deposits, to understand whether the lahar was triggered soon after the eruption or at later times. The  
386 hypothesis is that the temperature is higher in case of syn-eruptive lahars deriving from hot

387 ~~(pyroclastic current) deposits, and lower in all other cases of post-eruptive ones~~; iii) testing the  
388 relative sequence (contemporaneity) of the lahars emplacement with respect to the Pollena eruption.  
389 All hand-samples were oriented *in-situ* with magnetic and solar compasses and reduced to standard  
390 sizes at the CIMaN-ALP laboratory (Peveragno, Italy), where all the magnetic measurements were  
391 made. In Appendix [2B](#), the adopted paleomagnetic techniques and nomenclature are described.

392

## 393 **4. Results**

### 394 **4.1. Field stratigraphy and sedimentological features**

395 In this study, data of about 500 sites were collected, covering an area of >1000 km<sup>2</sup> from the plain  
396 around the volcanic edifice to the Apennine valleys to the north and east (Fig. 2).

397

#### 398 **4.1.1. Pyroclastic deposits: ~~eruptions of Pollena and 1631 eruptions~~**

399 The integration of the collected data with the existing ones (Rosi and Santacroce, 1983; Rosi et al.,  
400 1993; Rolandi et al., 2004; Sulpizio et al., 2005; Perrotta et al., 2006; Bisson et al., 2007; Santacroce  
401 et al., 2008; Gurioli et al., 2010; De Simone et al., 2011) allowed the reconstruction of the distribution  
402 maps for both the fallout and pyroclastic current deposits. In particular, the spatial distribution  
403 highlights that for both the Pollena and 1631 primary deposits, thick fine ash deposits are widely  
404 distributed and cover the coarse fallout sequence or directly the ground, modifying the isopachs  
405 reconstructed by previous authors (Sulpizio et al., 2006 and references therein; Figs. 5 and 6). This  
406 enlargement of the area affected can have important implications on the hazard evaluation in terms  
407 of possible damages on a densely inhabited territory.

408 The area covered by the comprehensive isopach maps (including both ~~the lapilli fallout~~ and ash  
409 fallout) turns out to be wider than ~~the one~~ previously known, above all because we ~~also~~ took into  
410 account for the ash ~~deposited by~~ fallout occurred during the final phreatomagmatic stages of the  
411 eruptions, ~~mostly dominated by phreatomagmatic explosions~~ (Rosi and Santacroce, 1983; Sulpizio et

412 al. 2005). The great ~~distribution and~~ availability and distribution of these ash deposits could explain  
413 the wide generation and distribution of the syn-eruptive lahars in the area. This has important  
414 implications ~~in on~~ the evaluation of the source area and ~~of the~~ material available for the lahars  
415 accompanying and following ~~this these~~ eruptions. ~~In particular~~ Interestingly, there is an increase of  
416 the areas covered by pyroclastic deposits ~~and the calculated volume of the emitted products. For~~  
417 ~~example, the area covered by the pyroclastic current deposits thus results in~~ is of about 200 km<sup>2</sup> for  
418 ~~the Pollena eruption, and 120 km<sup>2</sup> for the 1631 eruption, while. More significantly, t~~ The QGIS  
419 recalculated 10-cm isopach area for covered by the fallout deposits ~~it is of 433-837.35 km<sup>2</sup> (Pollena~~  
420 eruption) and 427-5287.51 km<sup>2</sup> (1631 eruption), respectively which compared to the lower values of  
421 569 km<sup>2</sup> (Pollena eruption) and 158 km<sup>2</sup> (1631 eruption) after Sulpizio et al. (2006) give an extra  
422 surface of about 47% and 230%, respectively. Geotechnically, A another implication is that the wide  
423 presence of fine and cohesive ash, not only on top of the coarse fallout sequences ~~and, in general but~~  
424 also on the ground, ~~reduces the permeability of the substrate,~~ preventing the water infiltration ~~of the~~  
425 ~~water and,~~ favoring the stream formations surficial runoff and creating sliding surfaces (Baumann et  
426 al., 2020). ~~They can also enhance the mobility of the flows by creating sliding surfaces.~~



427

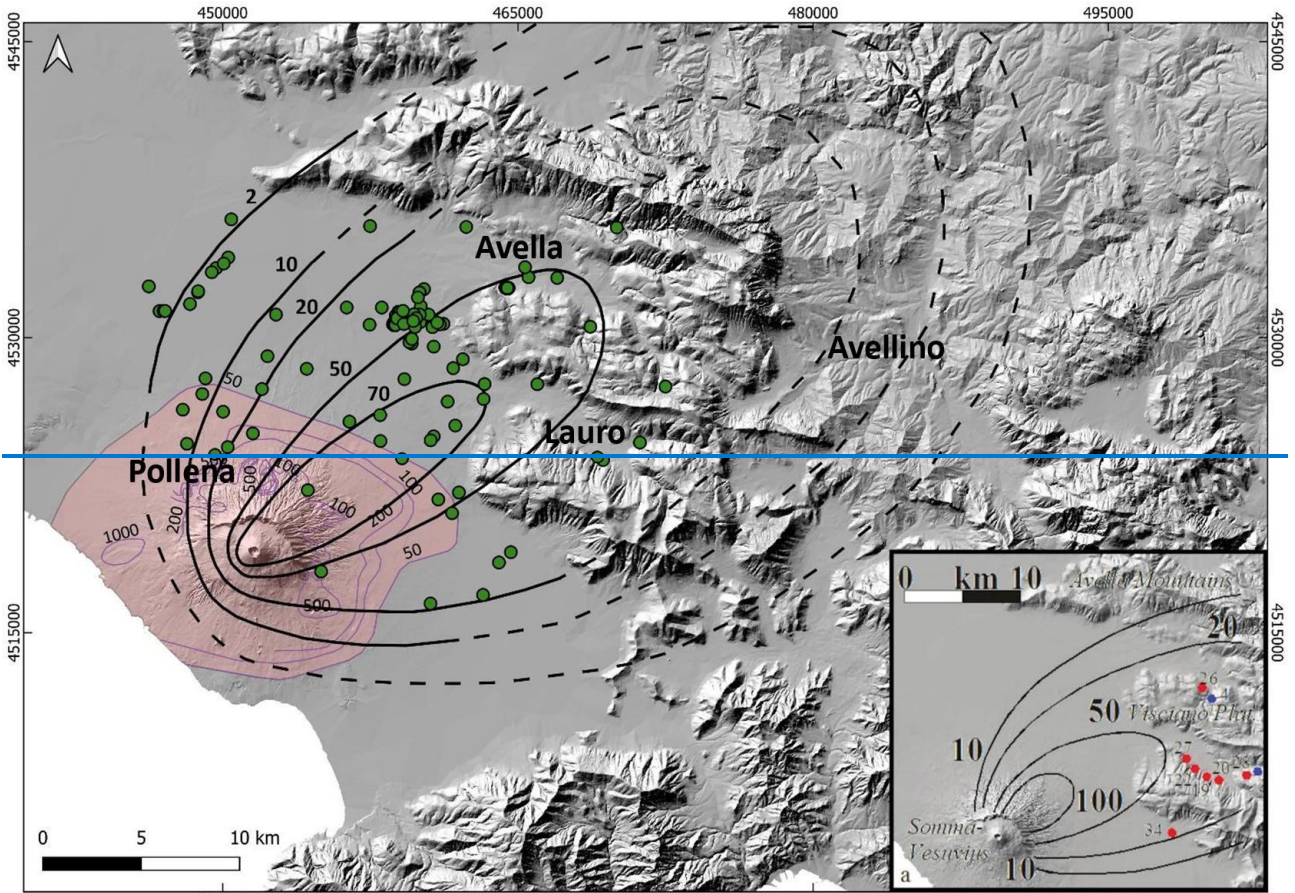

428

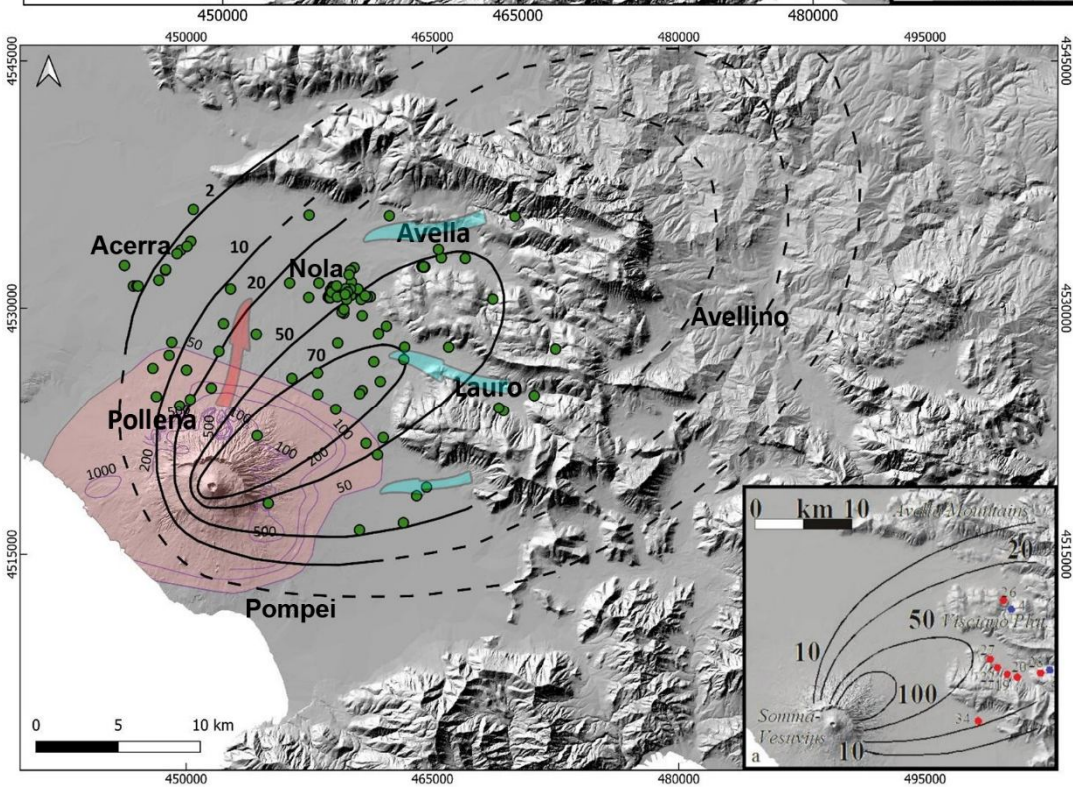

429

430 Fig. 5. Pollena eruption: the black lines represent the isopachs (in cm) of the fallout deposits modified after Sulpizio et  
 431 al., (2006) (in the inset) on the basis of the new collected data (green dots), while in pink is colored the area affected by  
 432 PDC—the pyroclastic current deposits (isopachs in cm, purple lines); modified after Gurioli et al. (2010) (purple lines).



433 The dotted parts of the isopachs represent some uncertainty related to the absence of new further data are extrapolated.  
434 The light blue arrows represent the general remobilization of the pyroclastic fallout deposits and lahar propagation from  
435 the Apennine slopes, while the pink one represents the combined remobilization of the pyroclastic current and fallout  
436 deposits and lahar propagation from Somma-Vesuvius.

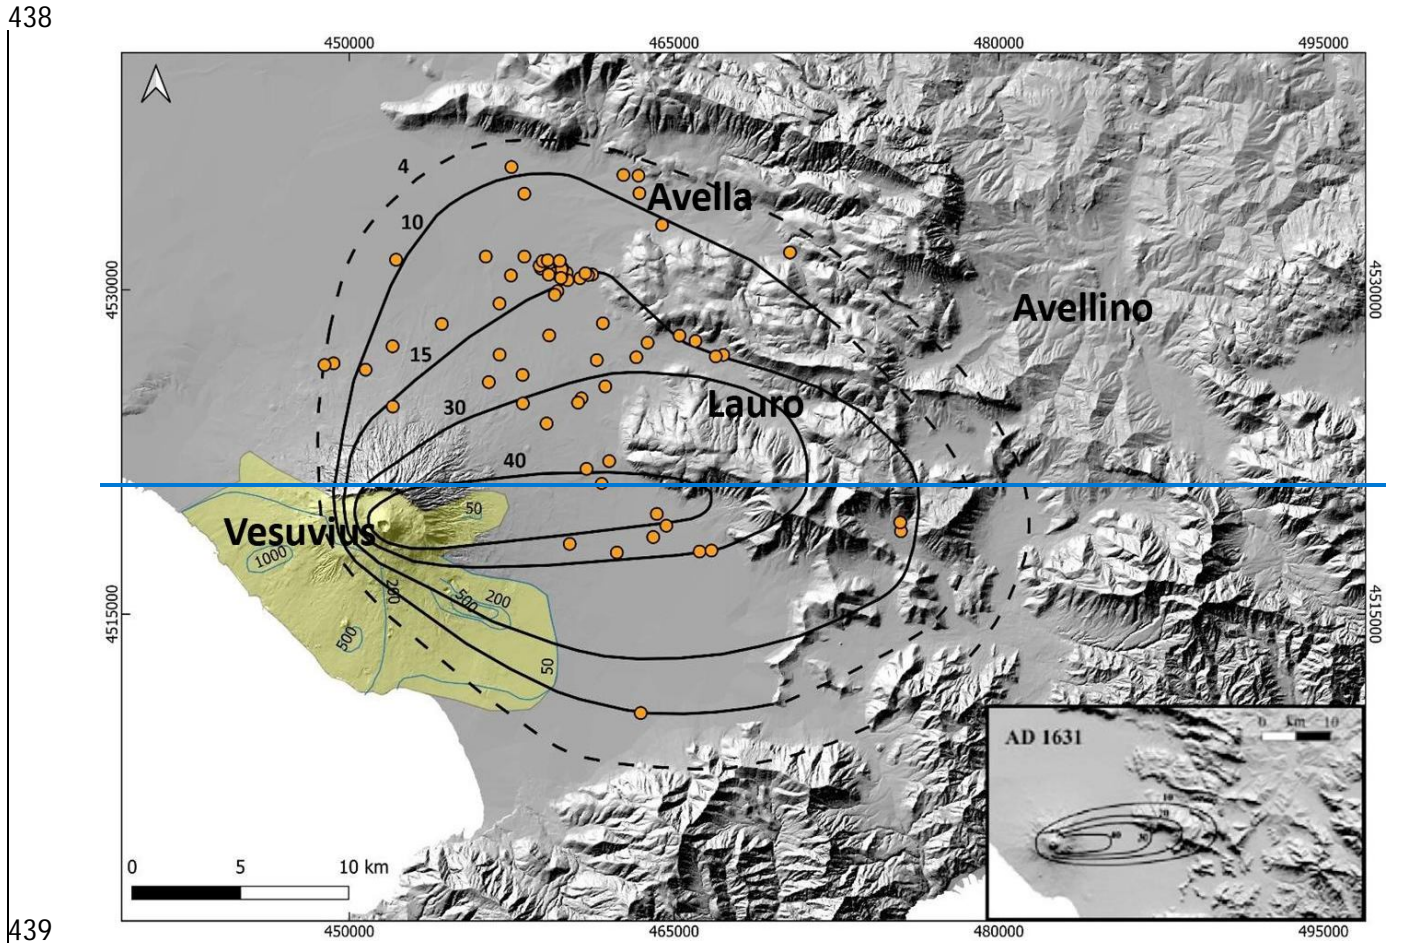

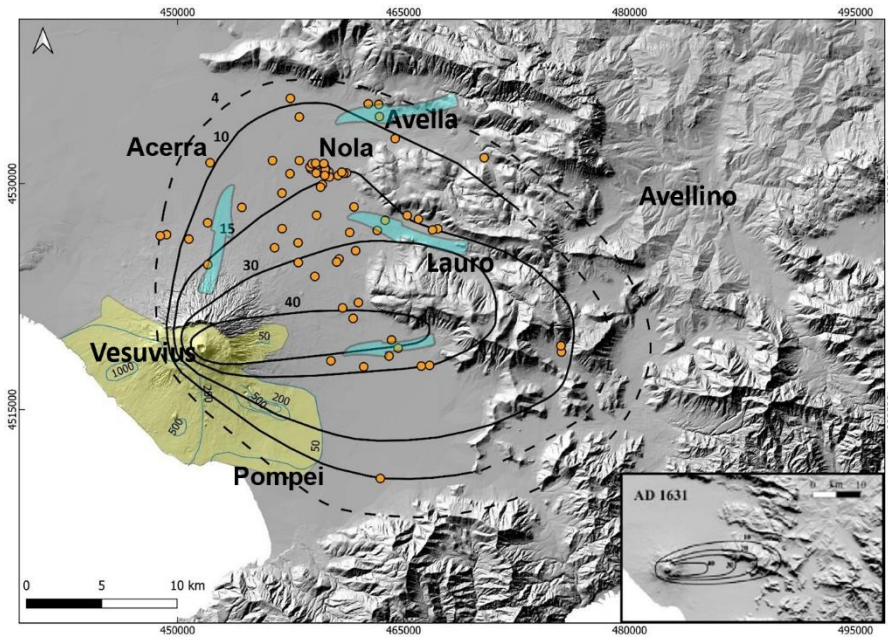

440

441 Fig. 6. 1631 eruption: the black lines represent the isopachs (in cm) of the fallout deposits, modified after Santacroce et  
 442 al., (2008) (in the inset) on the basis of the new collected data (orange dots), while in yellow is colored the area affected  
 443 by ~~PDC~~ pyroclastic current deposits (isopachs in cm, light blue lines). The light blue lines represent the inferred  
 444 distribution on the basis of an integration between field data and ~~font~~ chronicles, modified after Gurioli et al. (2010). The  
 445 dotted parts of the isopachs represent some uncertainty related to the absence of new further data are extrapolated. The  
 446 light blue arrows represent the general remobilization of the pyroclastic fallout deposits and lahar propagation from the  
 447 Apennine slopes and Somma-Vesuvius.

448

449 The ~~significant widening of the~~ area affected by accumulation of the 1631 eruption tephra-fallout  
 450 deposits is wider than previously known, particularly towards the north ~~for the 1631 eruption, which~~  
 451 follows the inclusion of the final ash deposits into the new isopachs. Interestingly, such widening of  
 452 the area agrees with the ~~wide~~ occurrence of lahars in the plain north of Vesuvius, as documented in  
 453 the ~~chronicles and~~ historical sources (Rolandi et al., 1993; Rosi et al., 1993, and references therein),  
 454 and as follows.

455

456 **4.1.2. Lahar deposits**

457 The lithological and sedimentological analyses carried out in the field allowed the macroscopic  
 458 definition of the primary pyroclastic deposits ~~involved in~~ affected by the remobilization, and of the  
 459 lahar deposits. In many cases, the archaeological findings permitted to define the local  
 460 paleoenvironment and ~~the related~~ land use, ~~and also to~~ then permitted to constrain the age and timing  
 461 of the deposition.

462 We grouped all deposit descriptions into representative lithofacies to more directly characterize both  
 463 the primary pyroclastic and lahar deposits (Tab. 2 and Fig. 7). Given the amount of data and  
 464 description of the studied areas, we used these lithofacies to characterize a number of macro-areas  
 465 between the Somma-Vesuvius sector and the nearby Apennine valleys (Appendix C). The lithofacies  
 466 mostly recognized are P to indicate paleosoil and humified surface, mL and mA (massive lapilli and  
 467 massive ash, respectively) to indicate the primary deposits, while the lahar deposits usually belong to  
 468 the facies Gms and mM, which indicate massive, matrix-supported gravel deposits and massive lahar  
 469 deposits, respectively. Other recognized lithofacies are Sh, Ss and fM. Sh indicates hyper-  
 470 concentrated flow deposits, and consists of an alternation of coarse and fine beds. Ss includes scour  
 471 and fill structures, and consists of an erosive, concave-upwards basal surface and a planar/convex  
 472 top. fM is fine mud, and indicates the decantation deposit formed when the flow loses its energy.

| <u>Symbol</u> | <u>Lithofacies</u>                                                                                                                                                                                                                                                                                                                |
|---------------|-----------------------------------------------------------------------------------------------------------------------------------------------------------------------------------------------------------------------------------------------------------------------------------------------------------------------------------|
| <u>P</u>      | <u>Paleosoil and humified surface, massive and composed of fine sand and silt from brown to dark brown, with several percentages of clay and organic matter. It indicates a stasis in the depositional processes.</u>                                                                                                             |
| <u>mL</u>     | <u>Alternation of Mmassive lapilli layers. Pyroclastic fall deposit, massive and composed of pumices and scoria lapilli with sparse accidental lithics.</u>                                                                                                                                                                       |
| <u>mA</u>     | <u>Massive ash. Pyroclastic fall deposit, massive and composed of fine to coarse ash with sparse pumice fragments, scoriae and accidental lithics.</u>                                                                                                                                                                            |
| <u>Gms</u>    | <u>Massive gravel and sand deposit, matrix-supported and poorly-sorted. The matrix is composed of fine to coarse sand, while the gravel clasts comprise scoriae and pumice clasts from the pyroclastic fall deposits. The massive feature of the single layers suggests a rapid emplacement from a highly-concentrated lahar.</u> |
| <u>mM</u>     | <u>Massive mud deposit composed of fine sand, silt and clay, sometimes with sparse pumice and lithic clasts. It is generated from a mud-dominated lahar.</u>                                                                                                                                                                      |



|           |                                                                                                                                                                                                                                                               |
|-----------|---------------------------------------------------------------------------------------------------------------------------------------------------------------------------------------------------------------------------------------------------------------|
| <u>Sh</u> | <u>Horizontal lamination and bedding features in sands. The deposit is composed of an alternation of fine to coarse sand and gravel, which can be gradual or <del>net</del>sharp. It comes from a hyper-concentrated lahar (less dense than the Gms one).</u> |
| <u>Ss</u> | <u>Scour and fill structures composed of fine to coarse sand, generally with a normal grading. A single structure consists of an erosive, concave upwards basal surface and a planar/convex top.</u>                                                          |
| <u>fM</u> | <u>Fine mud deposit composed of fine sand, silt and clay. It is generated when the lahar loses its energy and the fine grains settle gently.</u>                                                                                                              |

473 [Tab. 2. Symbol and description of the recognized lithofacies, and photos representative of each of them.](#)

474

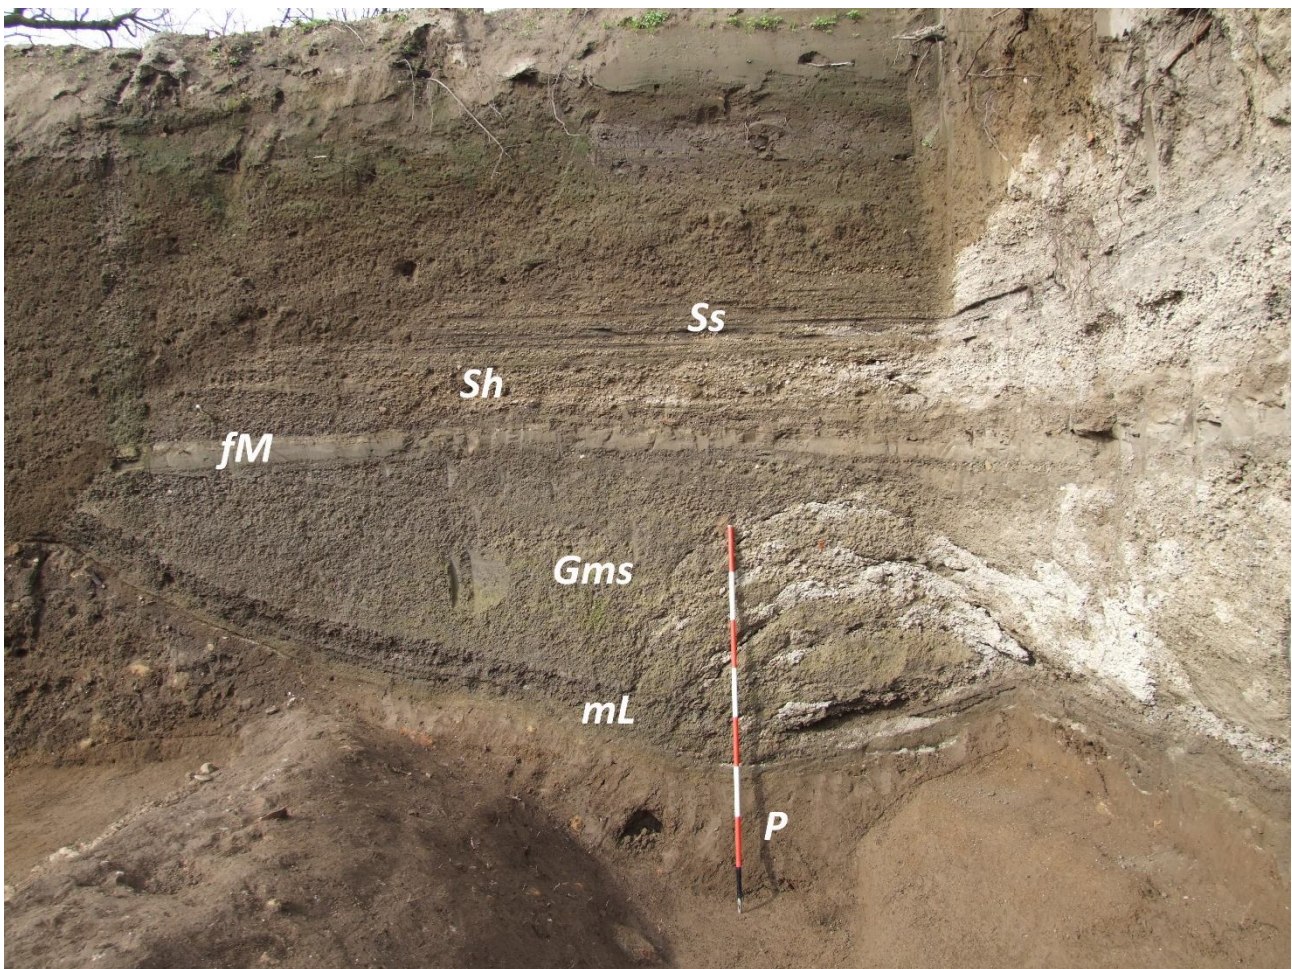

475

476 [a\)](#)



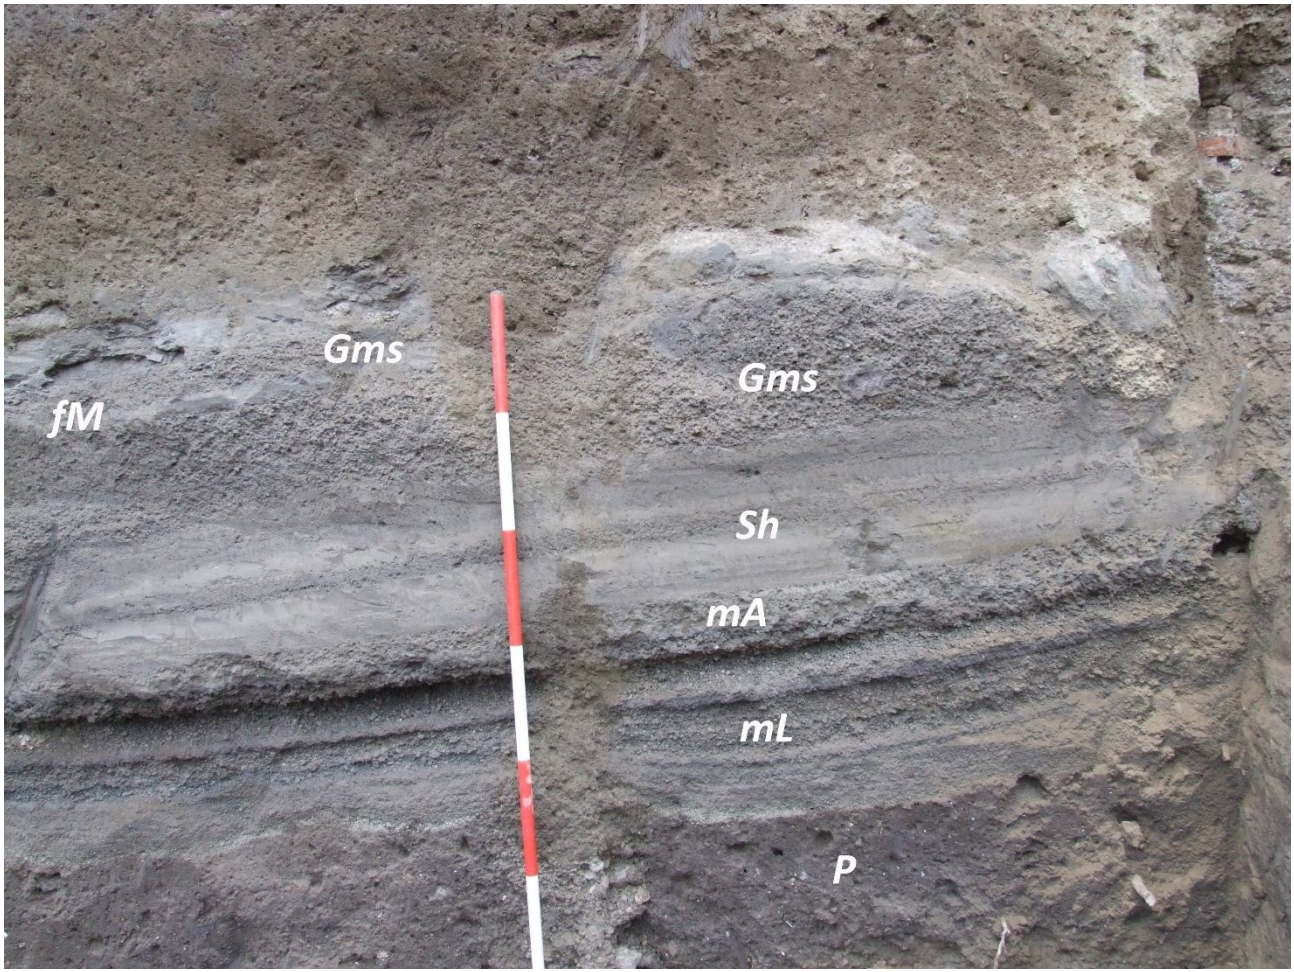

477

478 [b\)](#)

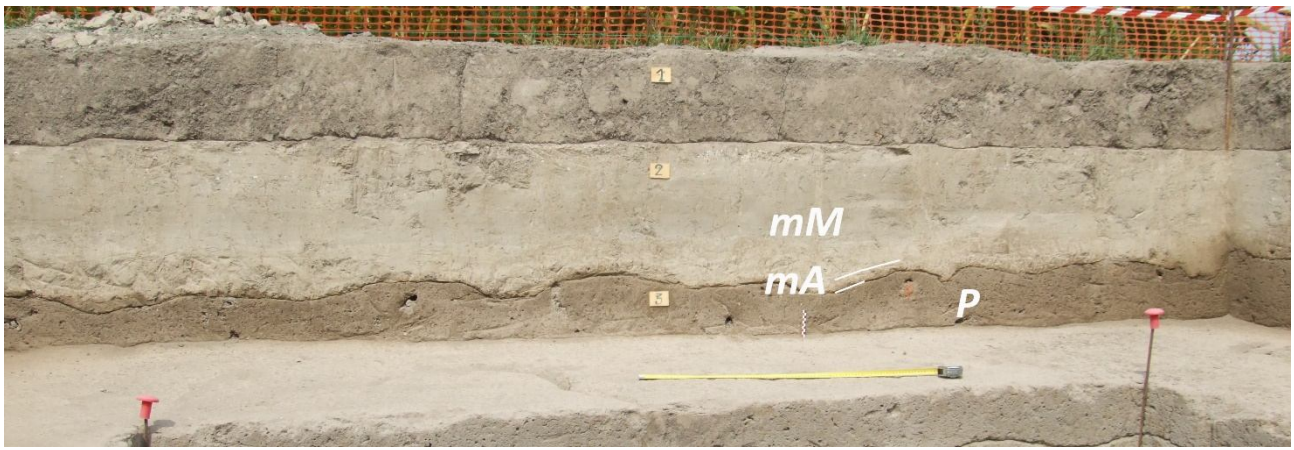

479

480 [c\)](#)

481 [Fig. 7. In these three photos of archaeological excavations \(a-b, Nola at 10-15 km from Apennine source valleys; c, Acerra](#)  
 482 [at 12 km from Somma-Vesuvius\), the main lithofacies recognized in the field are shown, including paleosols, pyroclastic](#)  
 483 [deposits, and lahar deposits; the corresponding lithofacies descriptions are reported in Tab. 2.](#)

484

485 Usually, the syn-eruptive lahar deposits directly overlie the primary pyroclastic deposits, sometimes  
486 eroding them. They have a matrix-supported texture and are composed of fine to very fine cohesive  
487 ~~cohesive~~ ash, and contain ~~scattered and~~ more or less abundant mm to cm-sized pumices and lithic  
488 fragments. ~~In general, These deposits are generally composed of~~ consist of multiple depositional  
489 flow units, each one resulting from single-pulse “en masse” ~~transport~~ emplacement, the piling of  
490 which resulting from rapid progressive aggradation through multiple flow pulses, in analogy with  
491 dense pyroclastic currents (Sulpizio et al., 2006; Doronzo, 2012; Roche, 2012, 2015; Breard and  
492 Lube, 2017; Smith et al., 2018; Guzman et al., 2020; see Sulpizio et al., 2014, p. 56) and similarly to  
493 lahar events occurred for example at Ischia (Italy) in 2022 (De Falso et al., 2023). For  
494 ~~this~~ Consequently, the studied lahars were modelled using a shallow layer approach (de’Michieli  
495 Vitturi et al., this issue). The different depositional flow units in the same deposit are distinguishable  
496 (still in continuity) from each other based on vertical granulometric changes, sparse pumice  
497 alignments, ~~internal lamination~~ deposit layering and/or unconformities. ~~Compared, f~~ For example,  
498 compared with to ~~channeled~~ channelized pyroclastic currents, dense water flows and floods, such  
499 depositional units (layers) could have been repeatedly emplaced, from bottom to top, under  
500 accumulation rates ~~of several~~ of a few tens to ~~a few~~ hundreds kg/m<sup>2</sup>s (Lowe, 1988; Russell and  
501 Knudsen, 1999; Whipple et al., 2000; Girolami et al., 2010; Roche, 2015; Marti et al., 2019; Guzman  
502 et al., 2020). In various areas, ~~the “en masse” transport~~ such rapid sequential emplacement is  
503 suggested by the presence of water escape structures through the whole deposit ~~and~~ by crossing the  
504 sequence of several units. These are vertical structures consisting of small ~~vertical~~ “pipes” filled ~~by~~  
505 with fine mud, transported by the escaping water, and formed soon after the emplacement of the lahar  
506 units. The ~~lithological~~ textural characteristics are variable even within the same site, but in general  
507 the deposits are generally massive, and contain vesicles, from circular to flattened ~~and~~, coated by fine  
508 ash that adhered into the voids after water evaporation loss. For the syn-eruptive lahar deposits, the  
509 pumice fragments are those of the primary deposits, ~~while~~. On the other hand, in the upper parts of  
510 the sequences it is not uncommon to find units that contain pumices fragments related to previous



511 eruptions, ~~in particular the~~ (9.0 ka B.P. "Mercato" and ~~the~~ 3.9 ka B.P. "Avellino" Plinian eruptions),  
512 recognizable based on pumice texture and crystal content (Santacroce et al., 2008). In this second  
513 case, these lahar deposits are considered as post-eruptive, meaning that the pyroclastic deposits older  
514 than the two studied sub-Plinian eruptions were progressively involved in an advanced erosion of the  
515 slopes and valleys exposed to weathering for some time, and then were deeply remobilized. Also,  
516 ~~the presence in the sequences~~ of slightly humified surfaces below the lahar deposits or the evidence  
517 trace of human artifacts, such as for example excavations, ~~plowing~~ ploughing, etc.,... are considered  
518 as ~~constraints evidence for of~~ a long period non-without deposition, ~~and; also in this case, the~~ lahars  
519 ~~generation is are~~ considered as post-eruptive. In other words, the similar componentry of the  
520 ~~secondary lahar deposits vs. and primary~~ pyroclastic deposits ~~for related to the two sub-Plinian~~  
521 ~~eruptions, as well as, and the evidence of short-term exposure between these two~~ vertical continuity  
522 ~~between the fallout and lahar deposits directly lying on the fallout deposits~~, are strong indicators of  
523 the syn-eruptive occurrence of the lahar events. Instead, the absence of such features is more  
524 indicative of a post-eruptive origin, ~~with i.e.~~ lahars events ~~also~~ more spaced in time from the  
525 corresponding eruption.

526 In Appendix 3C, a description is reported for some of the most representative sequences, which were  
527 sampled in different areas throughout the plain (Figs. 2 and 4).

528

#### 529 **4.1.3. Distribution maps of the lahar deposits**

530 Here we present ~~the~~ distribution maps for the lahar deposits of the ~~eruption of~~ Pollena and 1631  
531 eruptions (Figs. ~~87-110~~). The maps show the distribution of all thicknesses detected in the studied  
532 sites. In particular, the syn-eruptive Pollena lahar deposits are distributed in the NW quadrants of the  
533 volcano and in the Avella, Lauro and Sarno valleys (see Fig. 1), with a thickness exceeding 1 m in  
534 the Vesuvius apron and in the plain between Nola and Cimitile at about 10-15 km from Apennine  
535 source valleys -(see Figs. 1 and 87). A volume estimation of the remobilized deposits is of the order

536 of  $73 \times 10^{67} \text{ m}^3$  for the northern Vesuvius area, and  $42 \times 10^{67} \text{ m}^3$  for the Lauro Valley. Such volumes  
537 are referred to the depositional areas, and not to the detachment ones; for the latter see de' Michieli  
538 Vitturi et al. (this issue) and Sandri et al. (this issue). The provenance of the material in each site was  
539 inferred by sedimentological recognition and magnetic reconstruction. Then, the covered areas were  
540 subdivided into polygons in the geospatial database, in order to weight the local deposit thicknesses  
541 and estimate the volumes with a lower approximation.  
542

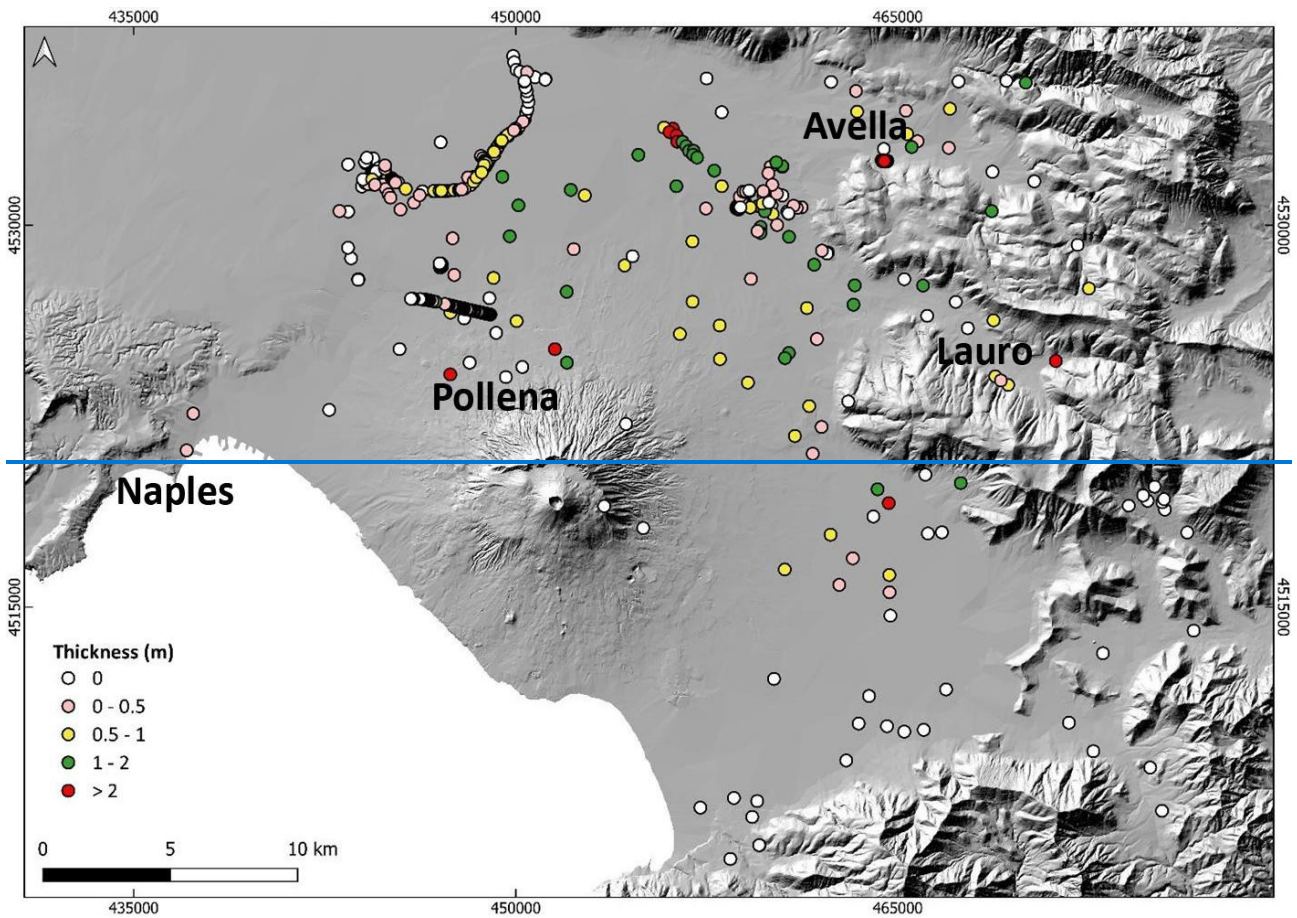

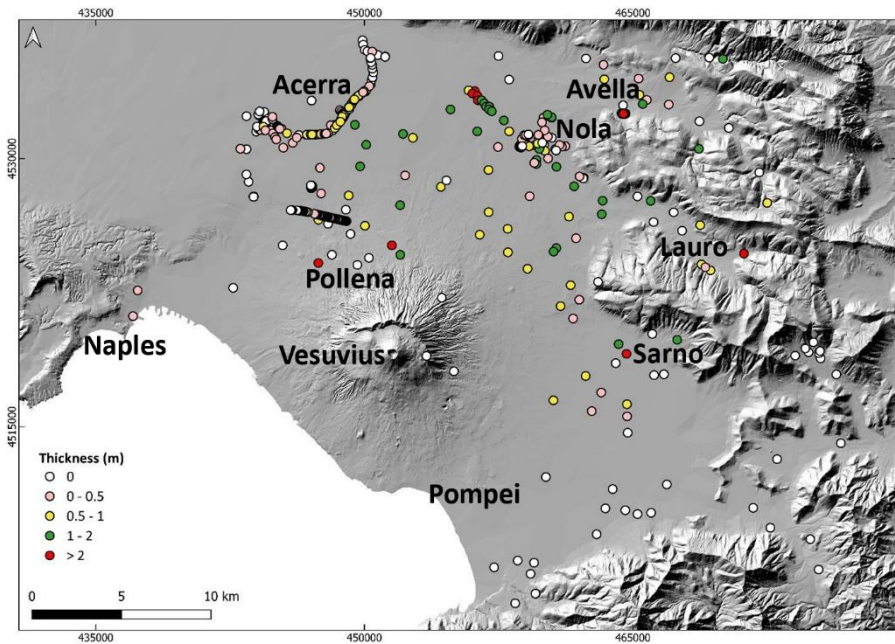

544

545 Fig. 87. Distribution of the syn-eruptive lahar deposits related to the Pollena eruption. The 0 m points represent the studied  
 546 sites where the lahar deposits were absent, and in some cases even the primary pyroclastic deposits below were absent;  
 547 they are reported anyway, as their absence might have not necessarily occurred by no deposition (local erosion).

548

549 The post-eruptive lahar deposits of the Pollena eruption are more ~~concentrated~~ distributed in the  
 550 Avella and Lauro valleys, and in the plain north of the volcano close to the apron area (low-angle  
 551 edifice outer slopes) (Figs. 1 and 98). Their deposits contain both fragments from the Pollena eruption  
 552 and from preceding eruptions, suggesting that pyroclastic deposits of the older sequences were  
 553 progressively eroded and involved in remobilization processes over time. As an example, ~~in~~ on Figs.  
 554 ~~A3a-d C1-4~~ it is ~~possible to recognize~~ remark that whitish pumice fragments from the Pomici di  
 555 Avellino and Mercato eruptions were identified on top of the Pollena lahar deposits.



556

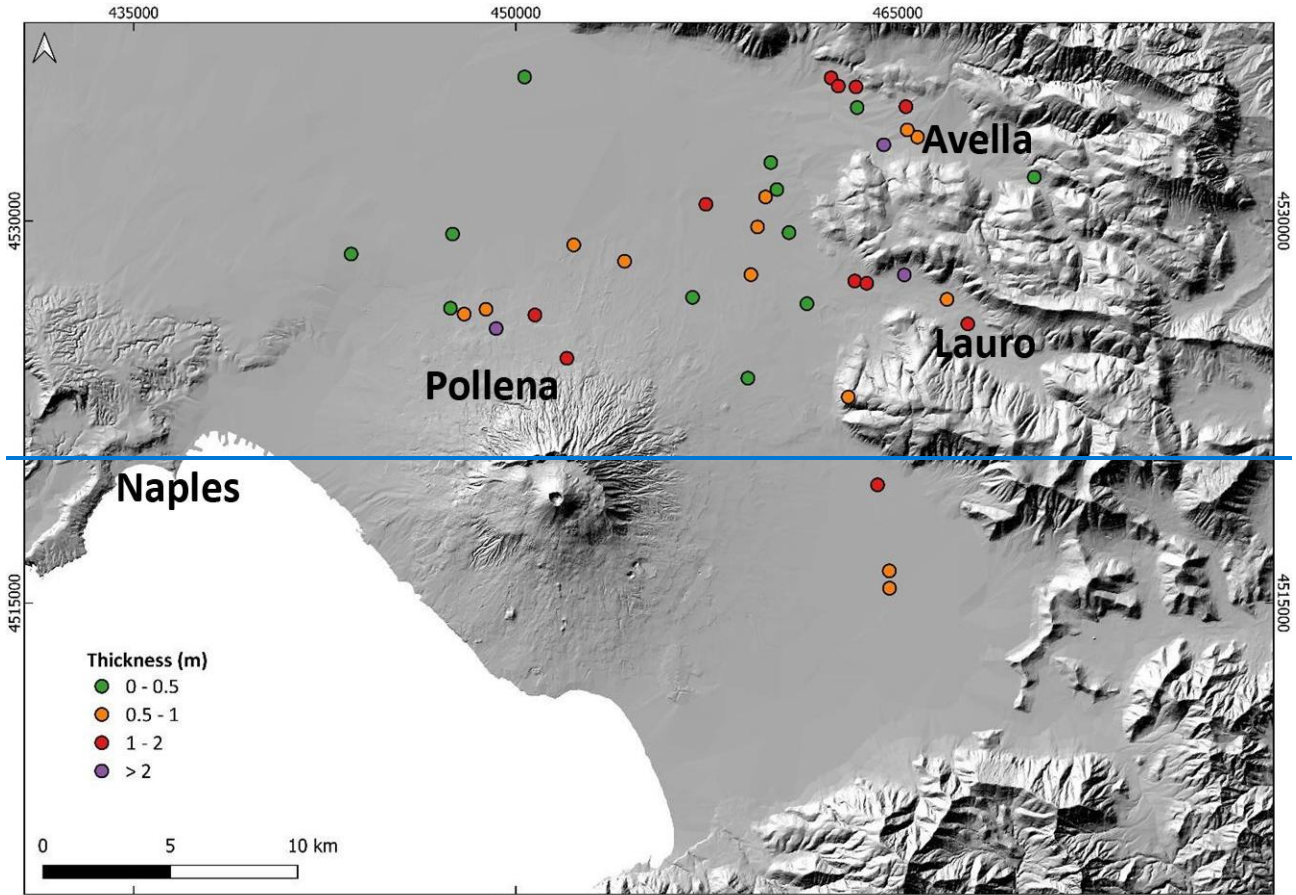

557

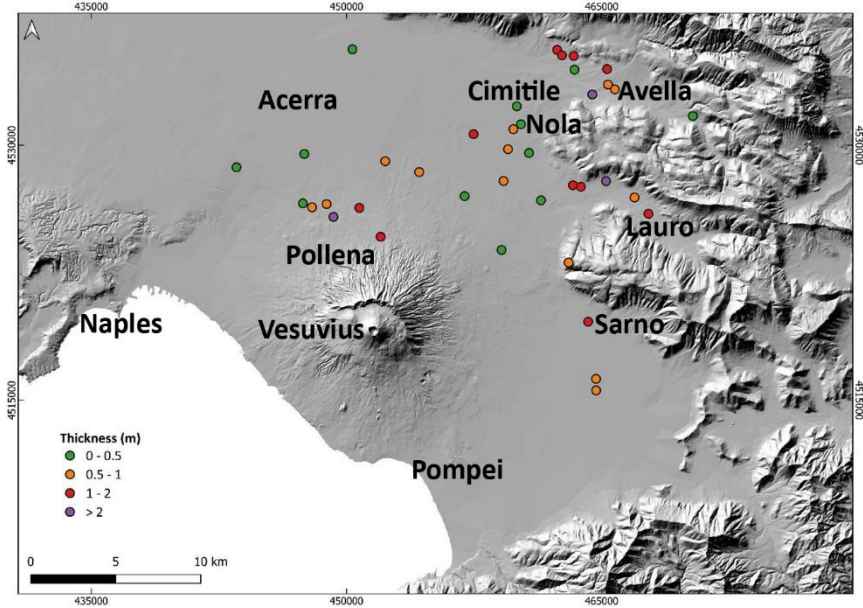

558

559 Fig. 98. Distribution of the post-eruptive lahar deposits related to the Pollena eruption.

560

561 [The distribution of the syn- and post-eruptive Pollena lahar deposits is related to the primary](#)  
562 [pyroclasts deposition: the dense distribution of the lahar deposits north of Somma-Vesuvius depends](#)  
563 [on the presence of thick pyroclastic current deposits that were remobilized from the northern slopes](#)

564 of the volcano, while the distribution in the Apennine valleys is related to the fallout deposits that are  
565 thicker along the major Pollena dispersal axis (Fig. 5).

566 Above the Pollena ~~primary and secondary~~ pyroclastic and lahar deposits ~~(meaning after the~~  
567 ~~emplacement of the Pollena lahars)~~ (both syn- and post-eruptive), the studied sequences in almost all  
568 the sites show the presence of a well-developed soil bed with many traces of cultivation, as well as  
569 of ~~the presence of~~ inhabited areas and buildings (Figs. ~~A3a-d~~ C1-4). These traces and the presence of  
570 ~~a well-developed~~ the soil bed are evidence of a progressive geomorphological stabilization of the  
571 territory. The occurrence of the 1631 sub-Plinian event determined a new phase of marked  
572 geomorphological instability for a large territory surrounding the volcano. In Fig. 109, it is shown the  
573 distribution of the syn-eruptive lahar deposits for the 1631 eruption in all the studied areas ~~with,~~  
574 having a variable thickness, generally <50 cm. ~~They~~ Such distribution affected mostly the areas of  
575 Acerra-Nola, Sarno, the Vesuvius apron and the Apennine valleys (Figs. 1 and 109). Rosi et al. (1993)  
576 and Sulpizio et al. (2006) reported that floods and lahars heavily impacted (also with injuries and  
577 victims) the N and NE quadrants of Somma-Vesuvius soon after the eruption with a timescale of days  
578 (Rosi et al., 1993; see also the historical chronicles of Braccini, 1632), corroborating the syn-eruptive  
579 behavior of such lahars. ~~Furthermore~~ Some lahar deposits are ~~also~~ intercalated within the primary  
580 pyroclastic deposits, ~~while but in~~ generally they directly stand ~~in continuity~~ on top of the primary  
581 pyroclastic deposits (Rosi et al., 1993); both cases unequivocally constrain the syn-eruptive behavior  
582 of the 1631 eruption lahars.

583

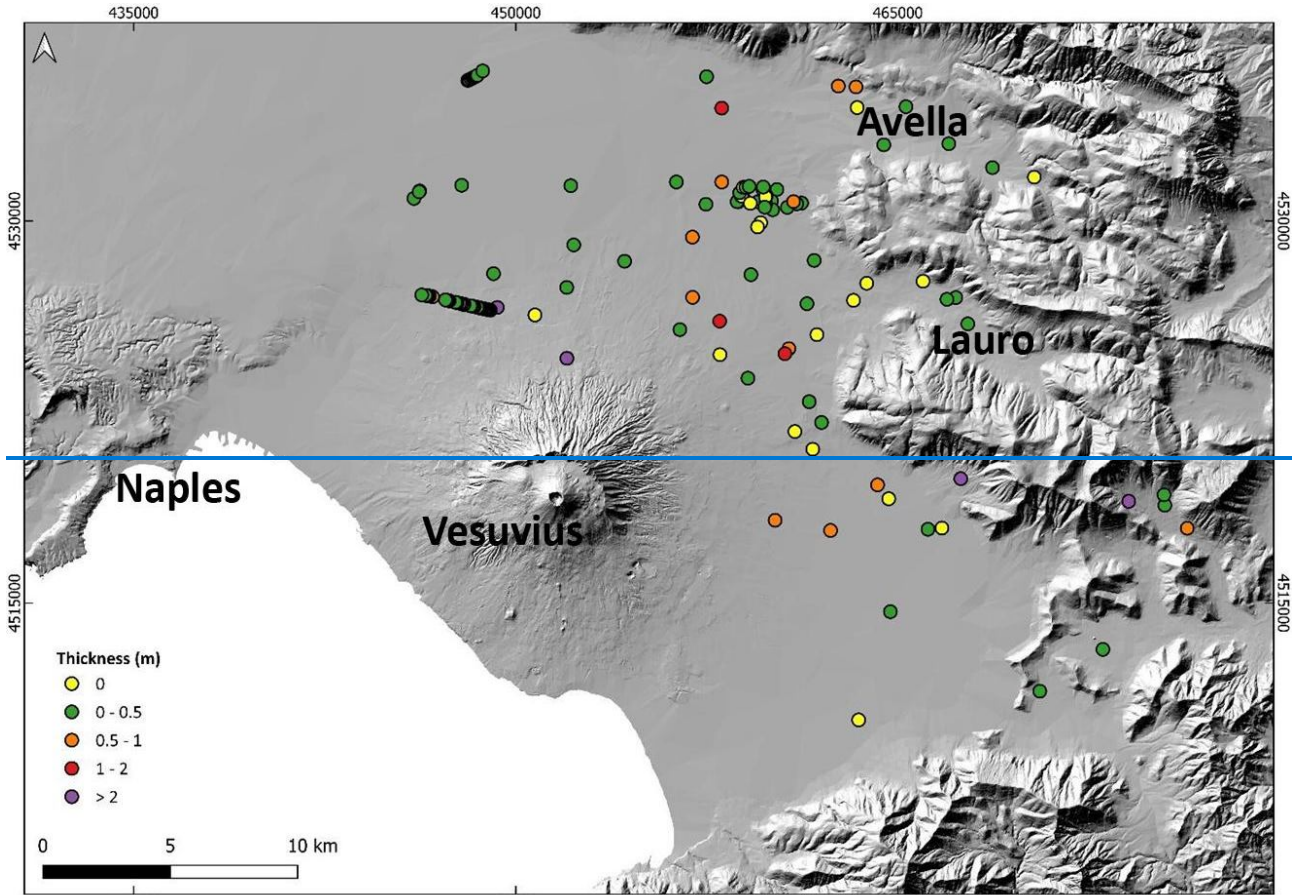

584

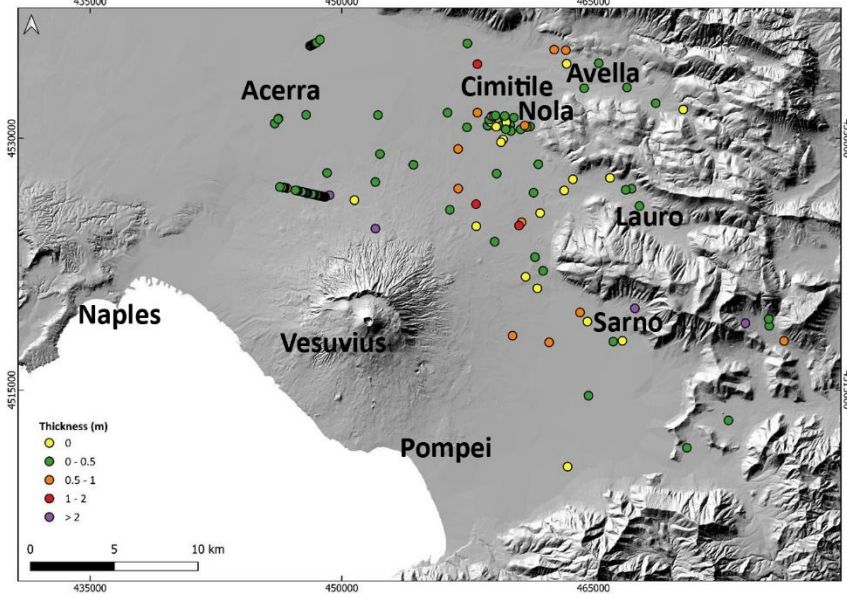

585

586 Fig. 109. Distribution of the syn-eruptive lahar deposits related to the 1631 eruption. The 0 m points represent the studied  
 587 sites where the lahar deposits were absent, and in some cases even the primary pyroclastic deposits below were absent;  
 588 they are reported anyway, as their absence might have not necessarily occurred by no deposition (local erosion).

589



590 In Fig. 110, Mminor post-eruptive lahar deposits of the 1631 eruption are reported in Fig. 10, with a  
591 preferential distribution to the E quadrants of the volcano from N to S, both in the plain and the  
592 valleys. These deposits are still significant, with a thickness of around half a meter to a meter or more  
593 in a few points.

594

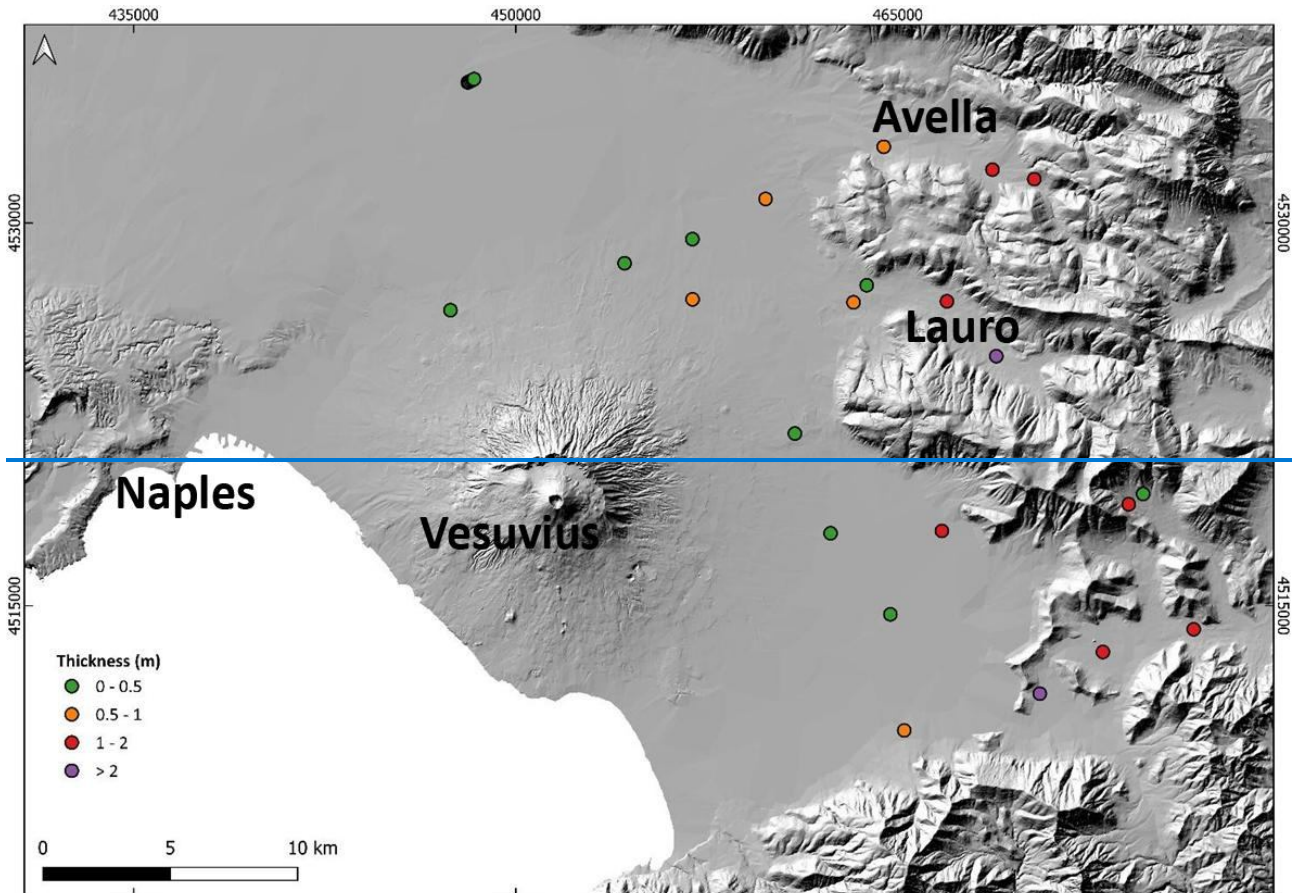

595

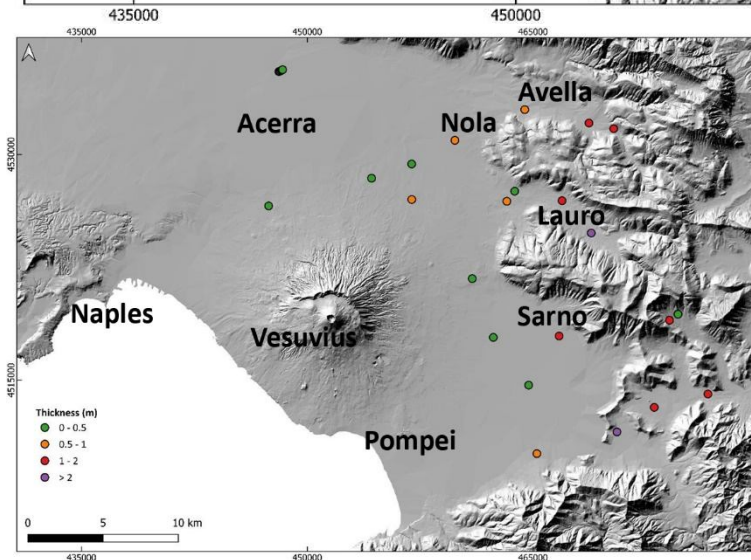

596

597 Fig. 110. Distribution of the post-eruptive lahar deposits related to the 1631 eruption.

598

599 The distribution of the syn- and post-eruptive 1631 lahar deposits mainly reflects the major dispersal  
600 axis affecting the fallout deposits distribution, while the pyroclastic current deposits were minorly  
601 remobilized as exposed on the gentler slopes of southwestern Vesuvius (Fig. 6).

602

#### 603 **4.1.4. Sedimentological characteristics of the Pollena lahar deposits**

604 The field analysis was carried out ~~on-in~~ about 500 ~~studied-different~~ sites for the construction of the  
605 database and maps, and-while the laboratory analysis ~~carried-out~~ was carried out on 30 ~~selected~~  
606 representative samples representative of the different areas ~~contribute; both analyses contributed to~~  
607 the distinction between syn- and post-eruptive lahars in the area. The results of the grain-size analyses  
608 in the form of (histograms-cumulative curves and statistical parameters) are presented in Fig. 124 and  
609 Tab. 1.

610 Petrological analysis on the syn-eruptive lahar deposits have not been performed because the  
611 lithology (colour, texture, mineral content) of the components is the same as the juvenile material of  
612 the primary deposits (more details can be found described in Sulpizio et al.; (2005). The loose crystals  
613 consist of sanidine, leucite, biotite and pyroxene fragments. Based on the results of the grain-size  
614 analyses-distributions of the samples, the coarser classes are defined from -4 to -1 phi, the medium  
615 ones-are from -0.5 to 2.5 phi, and the finest one-are from 3 phi. The juvenile pumice clasts are an  
616 ubiquitous component of the lahar deposits (both syn- and post-eruptive), but they decrease with  
617 distance toward-for the finer grain-size classes, while the crystal content increases in-with the same  
618 progression. The lithic clasts are abundant in-for the coarser classes, they decrease with distance in  
619 for the middle-medium grain-size classes, and increase again in-for the finer classes.

## Vallo di Lauro

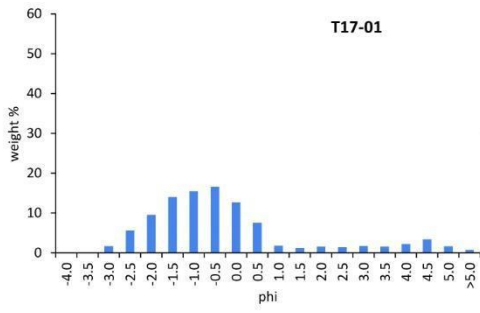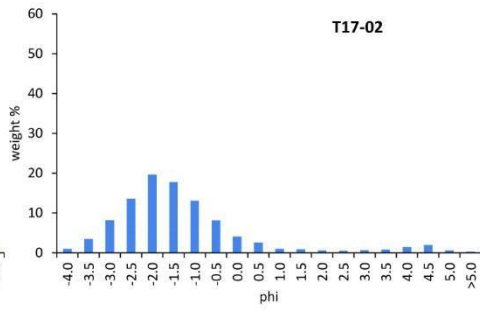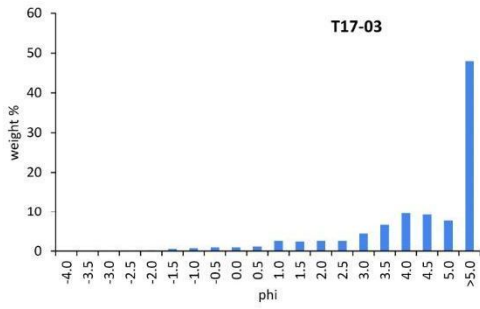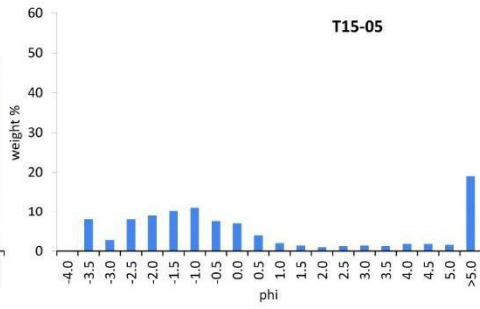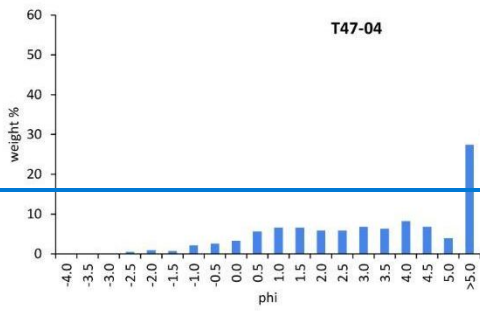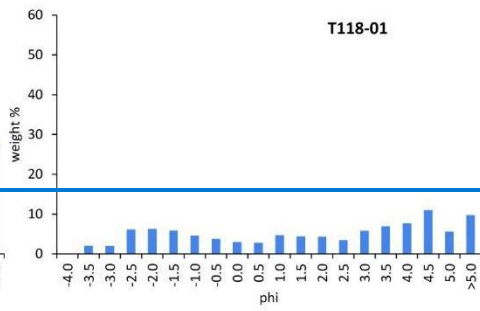

## Somma-Vesuvius

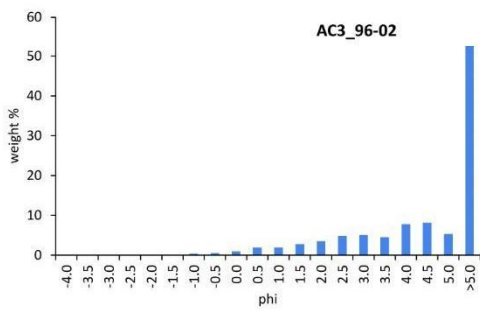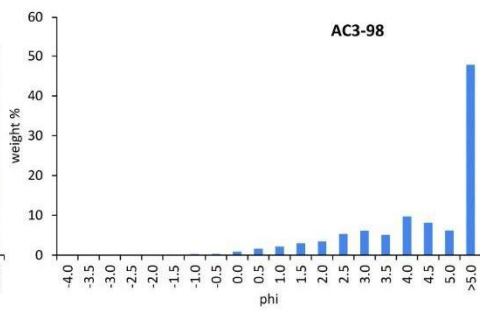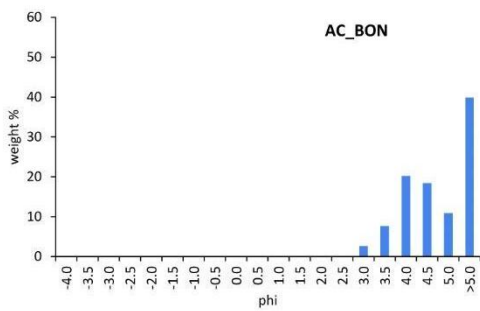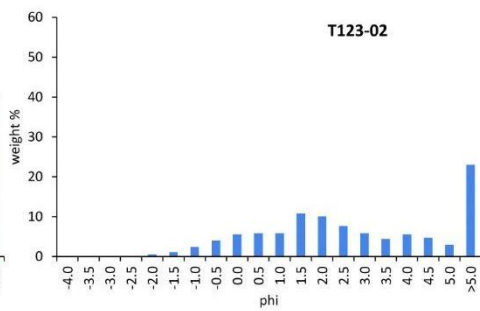

# Valle di Avella

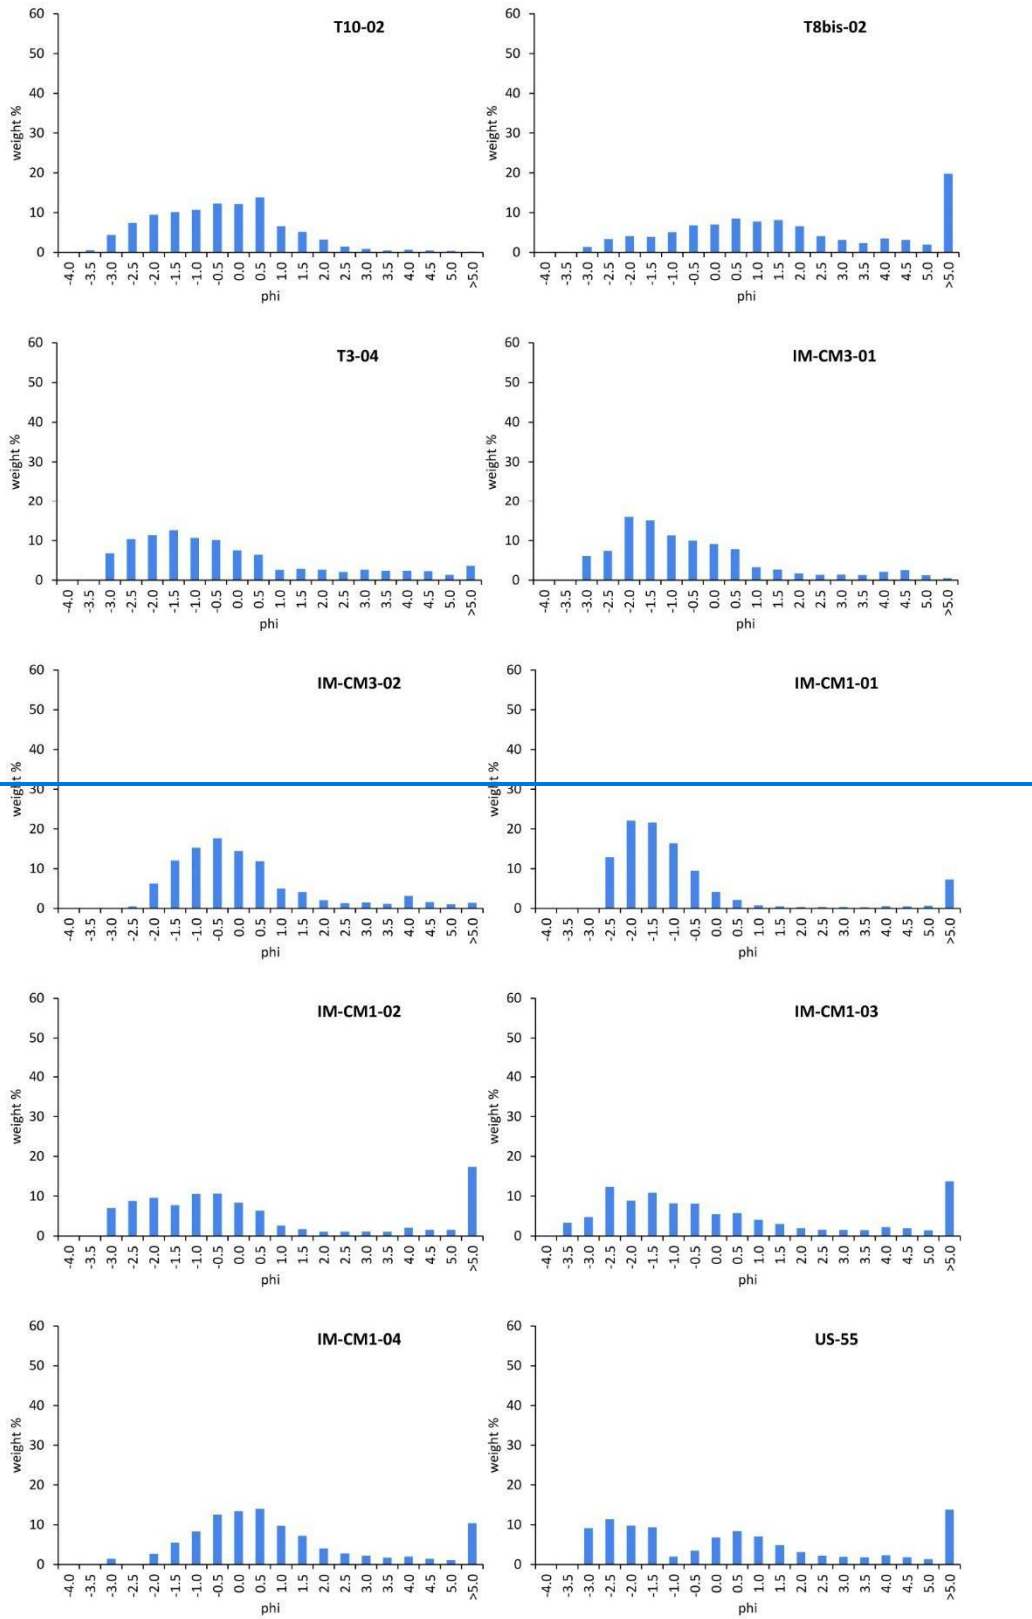

621

622

623

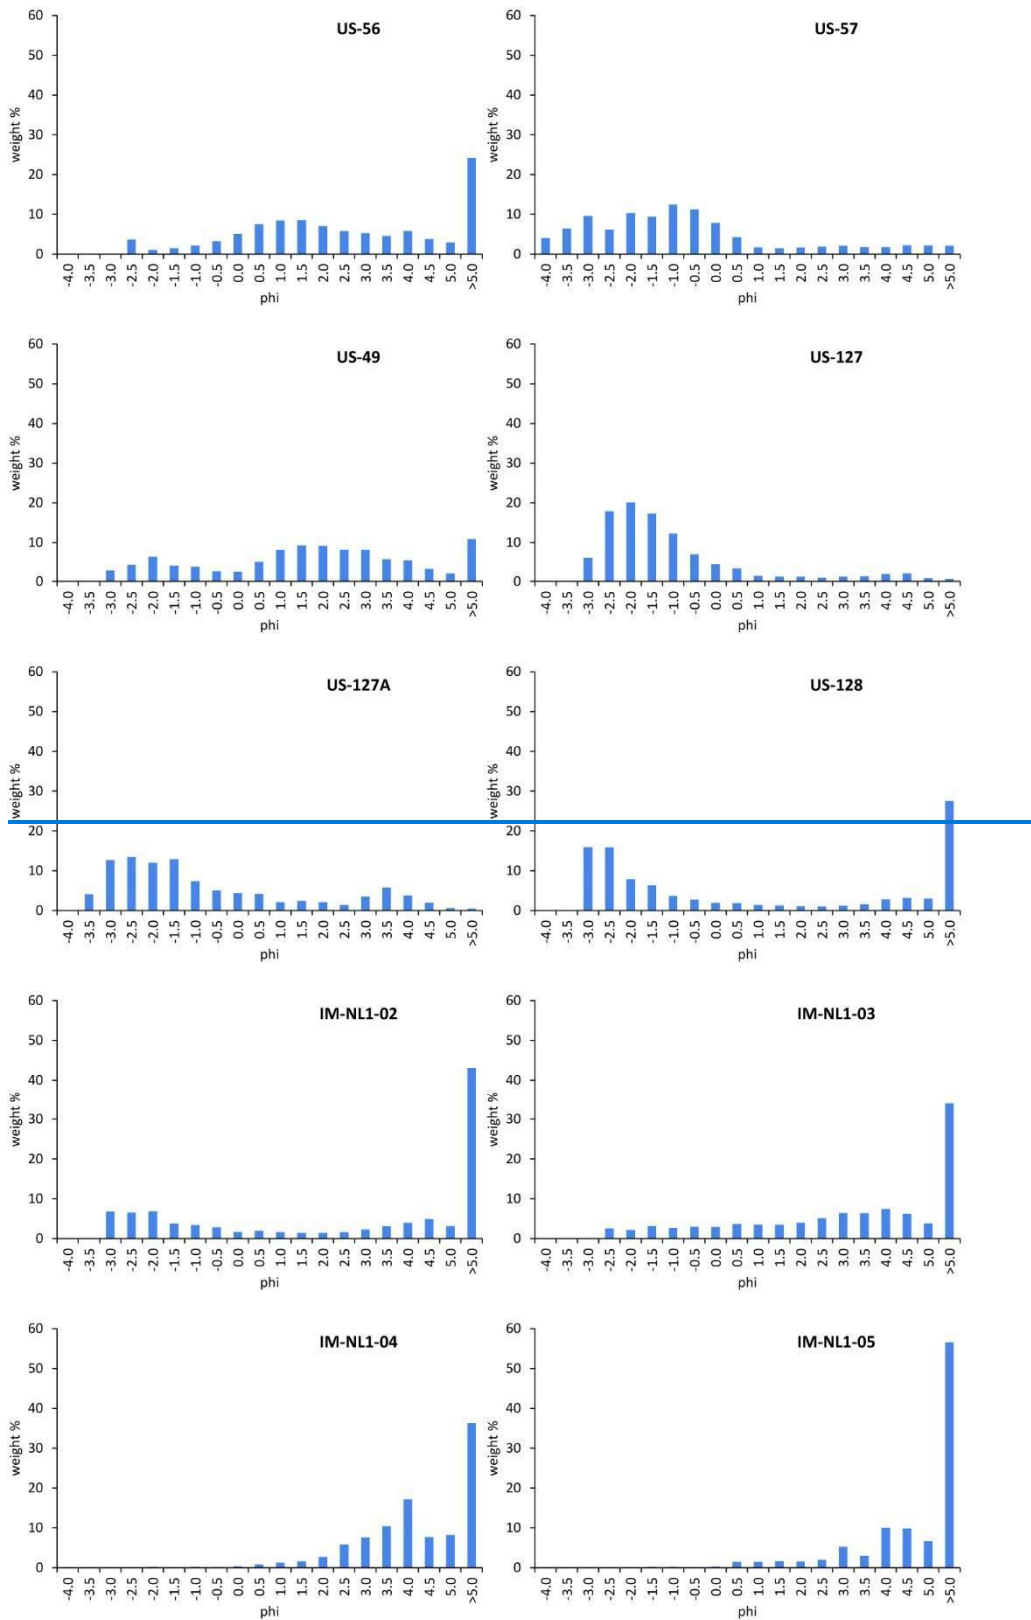

624

625

Fig. 11. Histograms of the grain-size analysis on selected samples for the locations reported in Fig. 4.

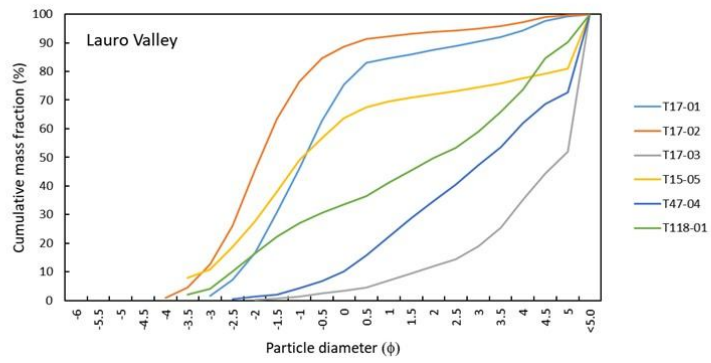

626

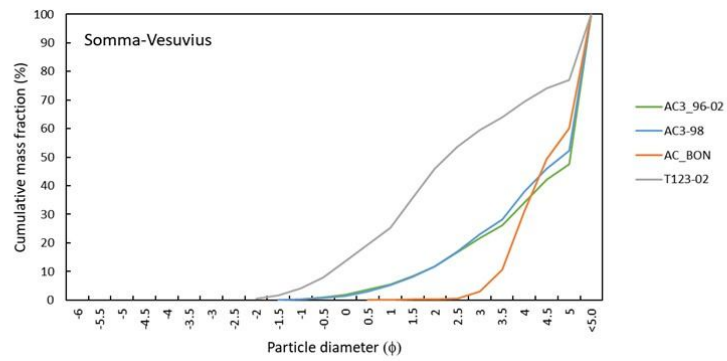

627



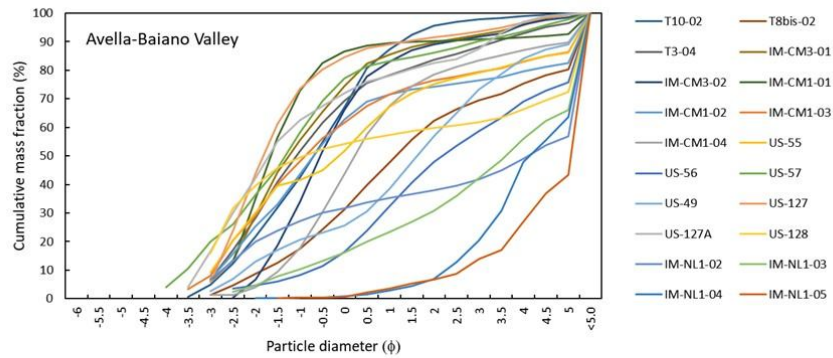

628

629 [Fig. 12. Cumulative curves of the grain-size analysis on the samples taken at the locations reported in Fig. 4, and](#)  
 630 [subdivided in three sectors: Lauro Valley \(top\), Somma-Vesuvius \(middle\), and Avella-Baiano Valley \(bottom\).](#)

631

| <u>Site</u>            | <u>Distance from Mt. Somma rim</u> |
|------------------------|------------------------------------|
| <a href="#">T17</a>    | <a href="#">12.8 km</a>            |
| <a href="#">T15</a>    | <a href="#">15 km</a>              |
| <a href="#">T47</a>    | <a href="#">7.6 km</a>             |
| <a href="#">T118</a>   | <a href="#">9.9 km</a>             |
| <a href="#">AC3_96</a> | <a href="#">15 km</a>              |
| <a href="#">AC3_98</a> | <a href="#">13 km</a>              |
| <a href="#">AC-BON</a> | <a href="#">11.5 km</a>            |
| <a href="#">T123</a>   | <a href="#">6.5 km</a>             |
| <a href="#">T10</a>    | <a href="#">18 km</a>              |
| <a href="#">T8bis</a>  | <a href="#">18.4 km</a>            |
| <a href="#">T3</a>     | <a href="#">19.1 km</a>            |

632

|               |                |
|---------------|----------------|
| <u>IM-CM3</u> | <u>14.3 km</u> |
| <u>IM-CM1</u> | <u>14 km</u>   |
| <u>US-55</u>  | <u>13.6 km</u> |
| <u>US-128</u> | <u>13.6 km</u> |
| <u>IM-NL1</u> | <u>13 km</u>   |

| SAMPLE                      | MODE 1 | MODE 2 | MODE 3 | SKEWNESS | SORTING | FACIES |
|-----------------------------|--------|--------|--------|----------|---------|--------|
| <b>Lauro Valley</b>         |        |        |        |          |         |        |
| T17-01                      | -0.743 |        |        | 1.179    | 1.464   | Gms    |
| T17-02                      | -2.243 |        |        | 1.532    | 1.404   | Gms    |
| T17-03                      | 0.747  | 3.731  |        | -1.054   | 1.481   | Sh     |
| T15-05                      | -3.743 | -1.243 | 3.731  | 0.890    | 1.752   | Gms    |
| T47-04                      | 1.247  | 3.731  |        | -0.447   | 1.579   | Mm     |
| T118-01                     | -2.243 | 0.747  | 3.731  | -0.049   | 2.352   | Gms    |
| <b>Avella-Baiano Valley</b> |        |        |        |          |         |        |
| T10-02                      | 0.247  |        |        | 0.274    | 1.457   | Sh     |
| T8bis-02                    | -2.243 | 0.247  | 1.247  | -0.009   | 1.742   | Sh     |
| T3-04                       | -1.743 | 1.247  | 3.237  | 0.881    | 1.789   | Gms    |
| IM-CM3-01                   | -2.243 |        |        | 1.015    | 1.587   | Gms    |
| IM-CM3-02                   | -0.743 | 3.731  |        | 1.134    | 1.379   | Gms    |
| IM-CM1-01                   | -2.243 |        |        | 1.954    | 1.010   | Gms    |
| IM-CM1-02                   | -2.243 | -1.243 | 3.731  | 0.932    | 1.633   | Gms    |
| IM-CM1-03                   | -2.743 | -1.743 | 0.247  | 0.810    | 1.809   | Gms    |
| IM-CM1-04                   | 0.247  |        |        | 0.406    | 1.394   | Fm     |
| US-55                       | -2.743 | 0.247  | 3.731  | 0.495    | 1.941   | Gms    |
| US-56                       | -2.743 | 1.247  | 3.731  | -0.402   | 1.700   | Sh     |
| US-57                       | -3.243 | -2.243 | -1.243 | 0.756    | 1.860   | Gms    |
| US-49                       | -2.243 | 1.247  |        | -0.460   | 2.012   | Gms    |
| US-127                      | -2.243 |        |        | 1.686    | 1.507   | Gms    |
| US-127A                     | -2.743 | -1.743 | 3.237  | 0.914    | 2.167   | Gms    |
| US-128                      | -3.243 | 3.731  |        | 1.434    | 1.990   | Gms    |
| IM-NL1-02                   | -3.243 | -2.243 | 3.731  | 0.609    | 2.378   | Gms    |
| IM-NL1-03                   | -1.743 | 0.247  | 3.731  | -0.458   | 1.996   | Gms    |
| IM-NL1-04                   | 3.731  |        |        | -1.698   | 0.995   | Mm     |
| IM-NL1-05                   | 1.247  | 2.737  | 3.731  | -1.137   | 1.224   | Mm     |
| <b>Somma-Vesuvius</b>       |        |        |        |          |         |        |
| AC3_96-02                   | 0.247  | 2.237  | 3.731  | -0.734   | 1.245   | Mm     |
| AC3-98                      | 2.737  | 3.731  |        | -0.838   | 1.197   | Mm     |
| AC_BON                      | 3.731  |        |        | -3.026   | 0.425   | Mm     |
| T123-02                     | 0.247  | 1.247  | 3.731  | -0.228   | 1.420   | Mm     |

633

| <u>Sample</u>       | <u>Mean (<math>\phi</math>)</u> | <u>Sorting (<math>\phi</math>)</u> | <u>Lithofacies</u> |
|---------------------|---------------------------------|------------------------------------|--------------------|
| <u>Lauro Valley</u> |                                 |                                    |                    |
| <u>T17-01</u>       | <u>-0.93</u>                    | <u>1.41</u>                        | <u>Gms</u>         |
| <u>T17-02</u>       | <u>-1.83</u>                    | <u>1.23</u>                        | <u>Gms</u>         |
| <u>T17-03</u>       | <u>2.42</u>                     | <u>1.46</u>                        | <u>Sh</u>          |



|                                    |              |             |            |
|------------------------------------|--------------|-------------|------------|
| <u>T15-05</u>                      | <u>-1.39</u> | <u>1.74</u> | <u>Gms</u> |
| <u>T47-04</u>                      | <u>1.67</u>  | <u>1.61</u> | <u>Mm</u>  |
| <u>T118-01</u>                     | <u>1.13</u>  | <u>2.7</u>  | <u>Gms</u> |
| <b><u>Avella-Baiano Valley</u></b> |              |             |            |
| <u>T10-02</u>                      | <u>-0.78</u> | <u>1.47</u> | <u>Sh</u>  |
| <u>T8bis-02</u>                    | <u>0.31</u>  | <u>1.83</u> | <u>Sh</u>  |
| <u>T3-04</u>                       | <u>-0.95</u> | <u>1.83</u> | <u>Gms</u> |
| <u>IM-CM3-01</u>                   | <u>-1.13</u> | <u>1.54</u> | <u>Gms</u> |
| <u>IM-CM3-02</u>                   | <u>-0.48</u> | <u>1.35</u> | <u>Gms</u> |
| <u>IM-CM1-01</u>                   | <u>-1.66</u> | <u>0.86</u> | <u>Gms</u> |
| <u>IM-CM1-02</u>                   | <u>-1.17</u> | <u>1.62</u> | <u>Gms</u> |
| <u>IM-CM1-03</u>                   | <u>-1.13</u> | <u>1.83</u> | <u>Gms</u> |
| <u>IM-CM1-04</u>                   | <u>0.06</u>  | <u>1.39</u> | <u>Fm</u>  |
| <u>US-55</u>                       | <u>-0.84</u> | <u>1.97</u> | <u>Gms</u> |
| <u>US-56</u>                       | <u>1.17</u>  | <u>1.8</u>  | <u>Sh</u>  |
| <u>US-57</u>                       | <u>-1.51</u> | <u>1.86</u> | <u>Gms</u> |
| <u>US-49</u>                       | <u>0.69</u>  | <u>2.16</u> | <u>Gms</u> |
| <u>US-127</u>                      | <u>-1.66</u> | <u>1.39</u> | <u>Gms</u> |
| <u>US-127A</u>                     | <u>-1.02</u> | <u>2.23</u> | <u>Gms</u> |
| <u>US-128</u>                      | <u>-1.72</u> | <u>1.91</u> | <u>Gms</u> |
| <u>IM-NL1-02</u>                   | <u>-0.5</u>  | <u>2.49</u> | <u>Gms</u> |
| <u>IM-NL1-03</u>                   | <u>1.25</u>  | <u>2.1</u>  | <u>Gms</u> |
| <u>IM-NL1-04</u>                   | <u>2.99</u>  | <u>0.89</u> | <u>fM</u>  |
| <u>IM-NL1-05</u>                   | <u>2.64</u>  | <u>1.20</u> | <u>fM</u>  |
| <b><u>Somma-Vesuvius</u></b>       |              |             |            |
| <u>AC3_96-02</u>                   | <u>2.37</u>  | <u>1.26</u> | <u>mM</u>  |
| <u>AC3-98</u>                      | <u>2.48</u>  | <u>1.2</u>  | <u>mM</u>  |
| <u>AC BON</u>                      | <u>3.52</u>  | <u>0.38</u> | <u>mM</u>  |
| <u>T123-02</u>                     | <u>1.37</u>  | <u>1.5</u>  | <u>mM</u>  |

634

635 Tab. 34. Statistical parameters (mean and sorting) extracted from the grain-size analyses, and reference lithofacies (see  
636 Tab. 2 for descriptions). ~~Mode 1, 2 and 3 indicate the coarsest, medium and fine modes, respectively. Mode 1, 2 and 3~~  
637 ~~represent the most frequently occurring grain size classes.~~

638

639 Field observations and ~~statistical granulometric grain-size parameters analyses~~(modes, skewness,  
640 ~~sorting~~), highlight significant differences between the sectors of Lauro Valley, Avella-Baiano Valley,  
641 and Somma-Vesuvius. A common feature between the three sectors is that the lahar deposit samples  
642 are mostly massive, poorly-sorted and ~~polimodal~~polymodal; only a few samples are moderately-  
643 sorted and unimodal (~~more than one grain size are present but one prevails~~sorting <1.5 phi). On the

644 other hand, the grain-size modes ~~extracted-found~~ show some interesting differences ~~(in Fig. 12 the~~  
645 ~~cumulative curves are shown)~~. The coarse modes for Lauro Valley and Avella-Baiano Valley span  
646 from fine/medium lapilli to coarse ash, while for Somma-Vesuvius span from coarse to fine ash. The  
647 medium modes for Lauro Valley and Avella-Baiano Valley span from coarse to medium ash, while  
648 for Somma-Vesuvius span from medium to fine ash. The fine modes for Lauro Valley and Avella-  
649 Baiano Valley, and for Somma-Vesuvius span from medium to fine ash. ~~Also, the skewness values~~  
650 ~~for Lauro Valley and Avella-Baiano Valley show a fine to coarse mode while for Somma-Vesuvius~~  
651 ~~show a coarse code.~~ All these differences basically depend on the origin of the primary pyroclastic  
652 deposits, fallout vs. pyroclastic currents, which were remobilized from different sectors, Apennines  
653 and Somma-Vesuvius. The grain-size analysis ~~of the above described granulometry~~ is used ~~to~~  
654 ~~informs an input information for~~ the ~~model of~~ lahar transport model (de' Michieli Vitturi et al.,  
655 ~~submitted this issue~~) aimed at assessing the related hazard (Sandri et al., ~~submitted this issue~~).

656

## 657 4.2. Magnetic results

658 Both Acerra (12 km from Somma-Vesuvius) and Nola (10-15 km from Apennine source valleys)  
659 localities show a well-defined magnetic fabric for the (Pollena syn-eruptive lahar deposits;  
660 irrespective of being syn- or post eruptive). Principal susceptibility axes ( $K_1 > K_2 > K_3$ ) are clustered,  
661 Magnetic lineation ( $K_1$ ) and magnetic foliation ( $K_3$ , pole of the plane) are mostly sub-horizontal or  
662 gently embricated. ~~and t~~The magnetic The anisotropy degree  $P_j$  ( $K_1/K_3$ ) is mostly lower than 1.060,  
663 but can reach high values ( ~~$P =$  like 1.200~~). At Acerra, the magnetic foliation is always dominant, and  
664 the fabric is oblate. The  $P_j$  is linearly correlated to the mean susceptibility ( $k_m$ ). In Appendix B, the  
665 full nomenclature is defined for completeness. The magnetic fabric has a horizontal magnetic  
666 foliation and a clustered magnetic lineation, whose mean direction is NE-SW. Considering the chaotic  
667 nature of the lahar deposits, the high  $P_j$  and the clustered susceptibility axes can highlight a  
668 channelized flow (Fig. 132). At Nola, instead, the fabric is both prolate/oblate, and  $P_j$  is lower than

669 1.040. The susceptibility axes are more dispersed than [at](#) Acerra, but mean magnetic lineation clearly  
 670 shows a NW-SE direction. If one considers the oblate specimens only, the magnetic foliation is sub-  
 671 horizontal, on the contrary, the magnetic foliation of the prolate specimens is steeply dipping ( $65^\circ$ )  
 672 toward SE. At Nola, the flow direction inferred by AMS is consistent and parallel to the invasion  
 673 basin.

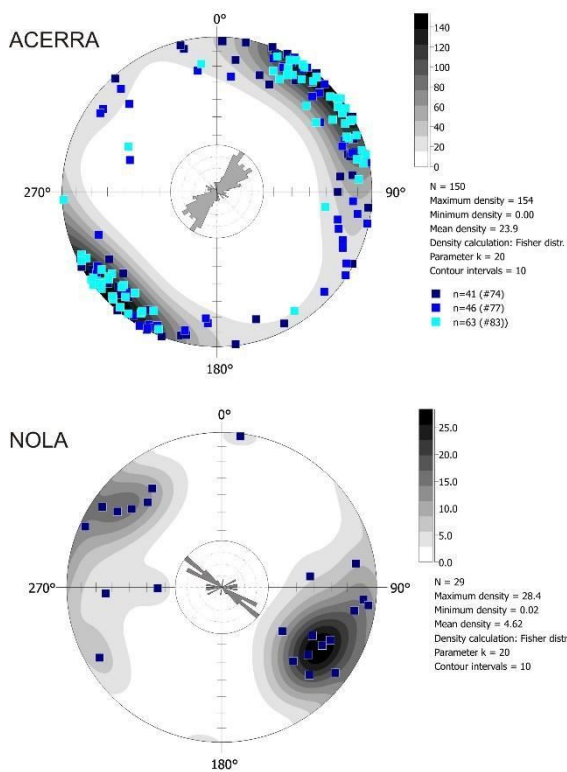

674

675 Fig. 132. Equal area projection and Rose diagram of the  $K_1$  directions at Acerra ([12 km from Somma-Vesuvius](#)) and Nola  
 676 ([10-15 km from Apennine source valleys](#)).

677

678 ~~The deposition temperature is low at both deposits.~~ At Acerra, the  $T_{\text{dep}}$  interval is 120-140 °C, while  
 679 for Nola  $T_{\text{dep}}$  is lower than 120 °C (Fig. 143). In the Nola case, a low temperature magnetization  
 680 component lower than 120 °C cannot be directly considered as a TRM. In fact, the low  $T_b$  Earth's  
 681 field component of magnetization can also be produced by a viscous remanent magnetization (VRM),  
 682 acquired during exposure to weak fields (Bardot and McClelland, 2000). The acquisition of the VRM  
 683 depends on the duration of the exposure. For age around that of the Pollena eruption, the minimum



684  $T_{dep}$  which can be distinguished is ca. 120 °C. For this reason, we considered the Nola lahar to be  
685 emplaced at low temperature.

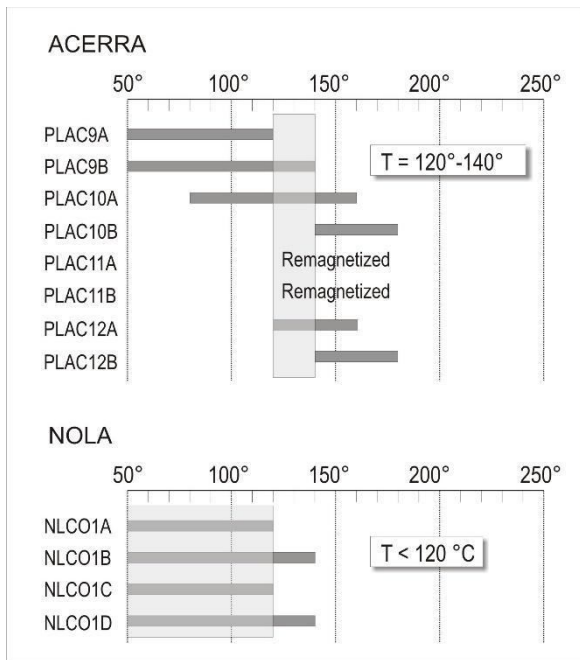

686

687 Fig. 143. Deposition temperature at Acerra and Nola. The site  $T_{dep}$  is estimated from the overlapping reheating  
688 temperature ranges for all lithic clasts sampled.

689

690 The mean paleomagnetic direction for each locality, calculated using Fisher's statistics, is well-  
691 defined, and its directional value and confidence limits do not overlap (Fig. 154). Thus, the two  
692 directions-and is are statistically distinguishable at the 95% confidence limits (Fig. 14). Since a  
693 paleomagnetic direction is a record of the Earth's magnetic field acting during the emplacement, it  
694 follows that-Therefore, the lahar deposits of-at these two localities are not synchronous.

695 Overall, all magnetic measurements just discussed show distinctly different characters between  
696 Acerra and Nola, clearly indicating two distinct events of emplacement.

697

698

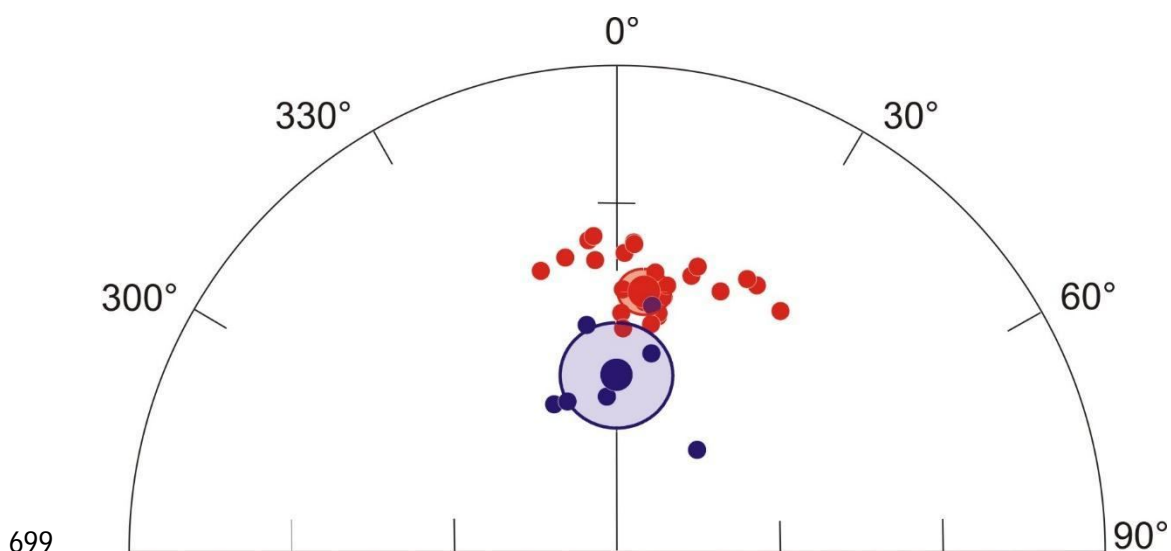

699  
 700 Fig. 154. Equal-area projection of the characteristic remanent magnetization directions, and their mean value with  
 701 associated confidence limit, from Acerra (red dots, mean value:  $n=26$   $D=7.5^\circ$ ,  $I=43.4^\circ$ ,  $\alpha_{95}=3.5^\circ$ ), and Nola (blue  
 702 dots, mean value:  $n=7$ ,  $D=0.8^\circ$ ,  $I=60.2^\circ$ ,  $\alpha_{95}=9.0^\circ$ ).

703

#### 704 4.3. Lahar dynamics

705 By inverting the field evidence and data, it is possible to reconstruct the macroscopic flow dynamics  
 706 that occurred in the lahar invasion, which are particularly interesting to understand the impact that  
 707 those lahars had on the Vesuvius territory. As already described, the lahar deposits show thicknesses  
 708 that are variable from several centimeters to a few meters, and this can depend on multiple local  
 709 factors: i) topography; ii) distance from source; iii) erosion; iv) source area and type of remobilized  
 710 sediment (variably sized fallout vs. flow deposits). In particular, thicker deposits are found near the  
 711 mouth of the valleys and in the flat alluvial plain, as shown in the deposit distribution maps. On the  
 712 other hand, the deposits show ~~on the whole~~ a general tabular-like shape (Fig. 7), ~~and the~~ with an  
 713 average thickness ~~is~~ of the order of 0.5-1 m recurrent for several studied sites, which is the first  
 714 evidence of the lahars impact and mass flow emplacement in the area. In terms of runout distance,  
 715 the lahars travelled for 10 to 15 km from sources (Somma-Vesuvius and Apennine detachment areas),  
 716 ~~measured directly on the deposit distribution maps~~ based on the geospatial database that includes all  
 717 studied sites. It was possible to infer the source areas based on the common sedimentological features

718 [of the lahar deposits between nearby sites. On the other hand, distant sites with sedimentologically](#)  
 719 [different deposits were fed from different source areas.](#) These important ~~quantitative~~ constraints are  
 720 used to validate and inform lahar numerical models (de' Michieli Vitturi et al., [submitted this issue](#))  
 721 and simulations (Sandri et al., [submitted this issue](#)) [using a shallow layer approach](#) for hazard  
 722 assessment. We cannot rule out that lahar pulses from different source areas (Somma-Vesuvius vs.  
 723 Apennines) might have overlapped [and further aggraded](#) in the open plain.  
 724 At several locations, we found ~~erosive-erosional~~ unconformities ~~between~~ (Fig. 165a) [between](#) the  
 725 lower and upper flow units (Fig. 165b), as well as between ~~primary-the~~ pyroclastic ~~deposits~~ and lahar  
 726 ~~units~~ [deposits](#). Erosion is an important factor for the entrainment of pre-existing materials [and objects](#),  
 727 [which include](#) ~~ing~~ large-size clasts [external to the remobilized pyroclastic material](#). Size and density  
 728 of the largest clasts embedded in the deposits can give an idea of the carrying capacity of the lahars.  
 729

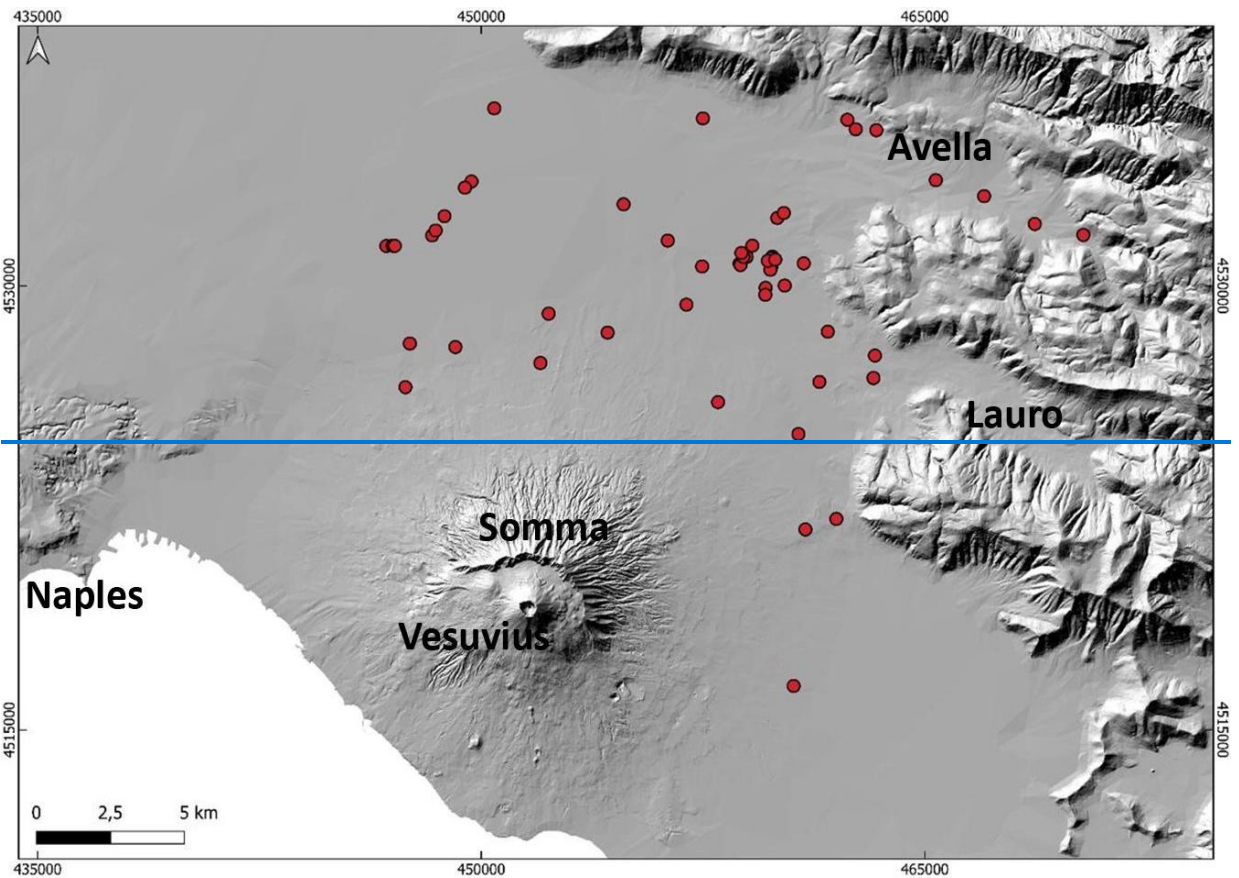

730



731

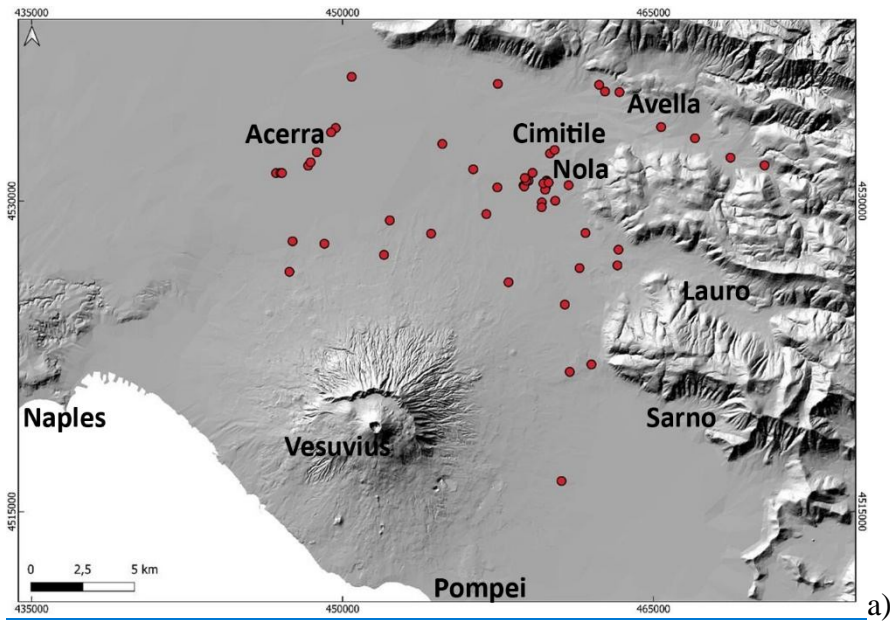

a)

732

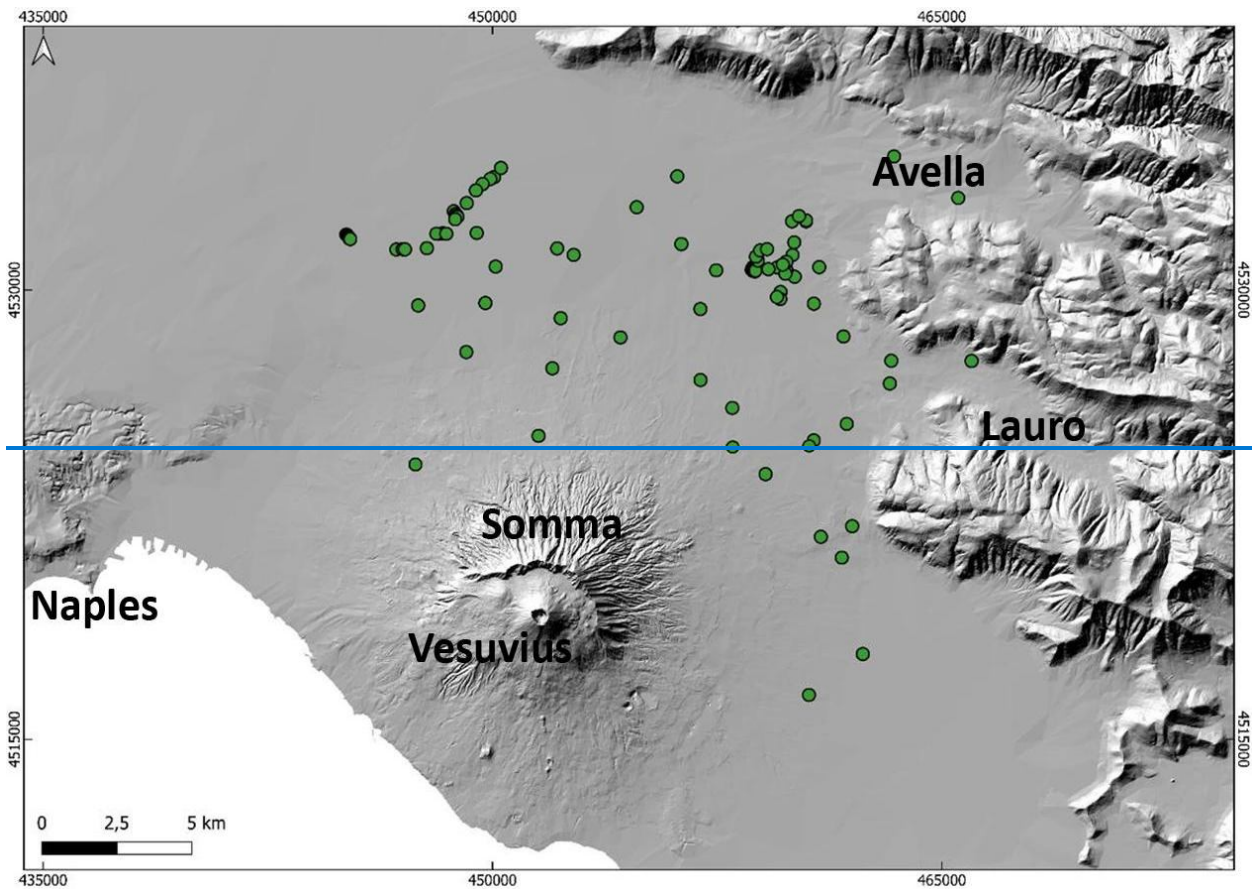

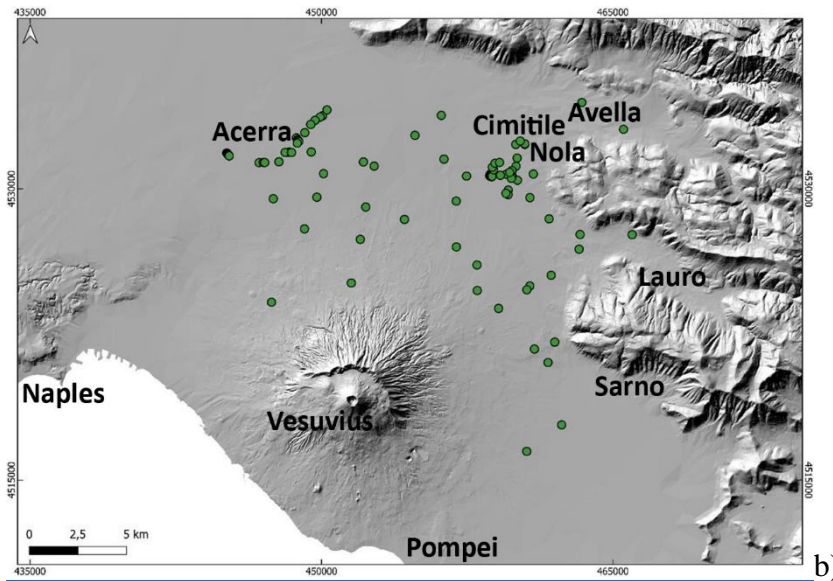

733 b)

734 Fig. 165. a) Sites with evident erosion traces at the base of the lahar units; b) Sites in which multiple depositional flow  
 735 units are vertically identified. Both evidences corroborate the interpretation of the depositional mechanisms, as well as  
 736 constrain the choice of the shallow layer approach for the lahar models and simulations (de'Michieli Vitturi et al., this  
 737 issue; Sandri et al., this issue).

738

739 Evidence Occurrences of oversize-large clasts and boulders are observed-reported in all the studied  
 740 areas invaded both by the syn- and post-eruptive lahars, with a distribution that is similar to follows  
 741 the one of the lahar deposits themselves (but with less proportions), and in particular both are found  
 742 at the mouth of the valleys, and in the alluvial plain (Fig. 15a). The presence of the erosional features  
 743 (Fig. 16a), and the fact that the deposits are ubiquitously mostly composed of massive and relatively  
 744 thick units (Fig. 16b), suggest that high sediment transport and deposition were not exclusive  
 745 processes both occurred, i.e. they both occurred even at local scale in the same area (Doronzo and  
 746 Dellino, 2013; Roche, 2015). Such occurrences of erosion and accumulation of multiple units were  
 747 useful to inform the lahar modelling of de'Michieli Vitturi et al. (this issue).

748 We calculated local velocities of the syn- and post-eruptive Pollena lahars based on the biggest clasts  
 749 that are found in the deposits at various stratigraphic heights, with boulder dimensions from several  
 750 centimeters to a meter, and for flow density  $\geq$  water density (Appendix 4A). The faster the lahar the  
 751 higher the capability of its flow to entrain bigger external clasts. This occurred at locations where

752 such clasts were freely available on the substrate, or where the lahars impacted and damaged  
 753 anthropogenic structures.

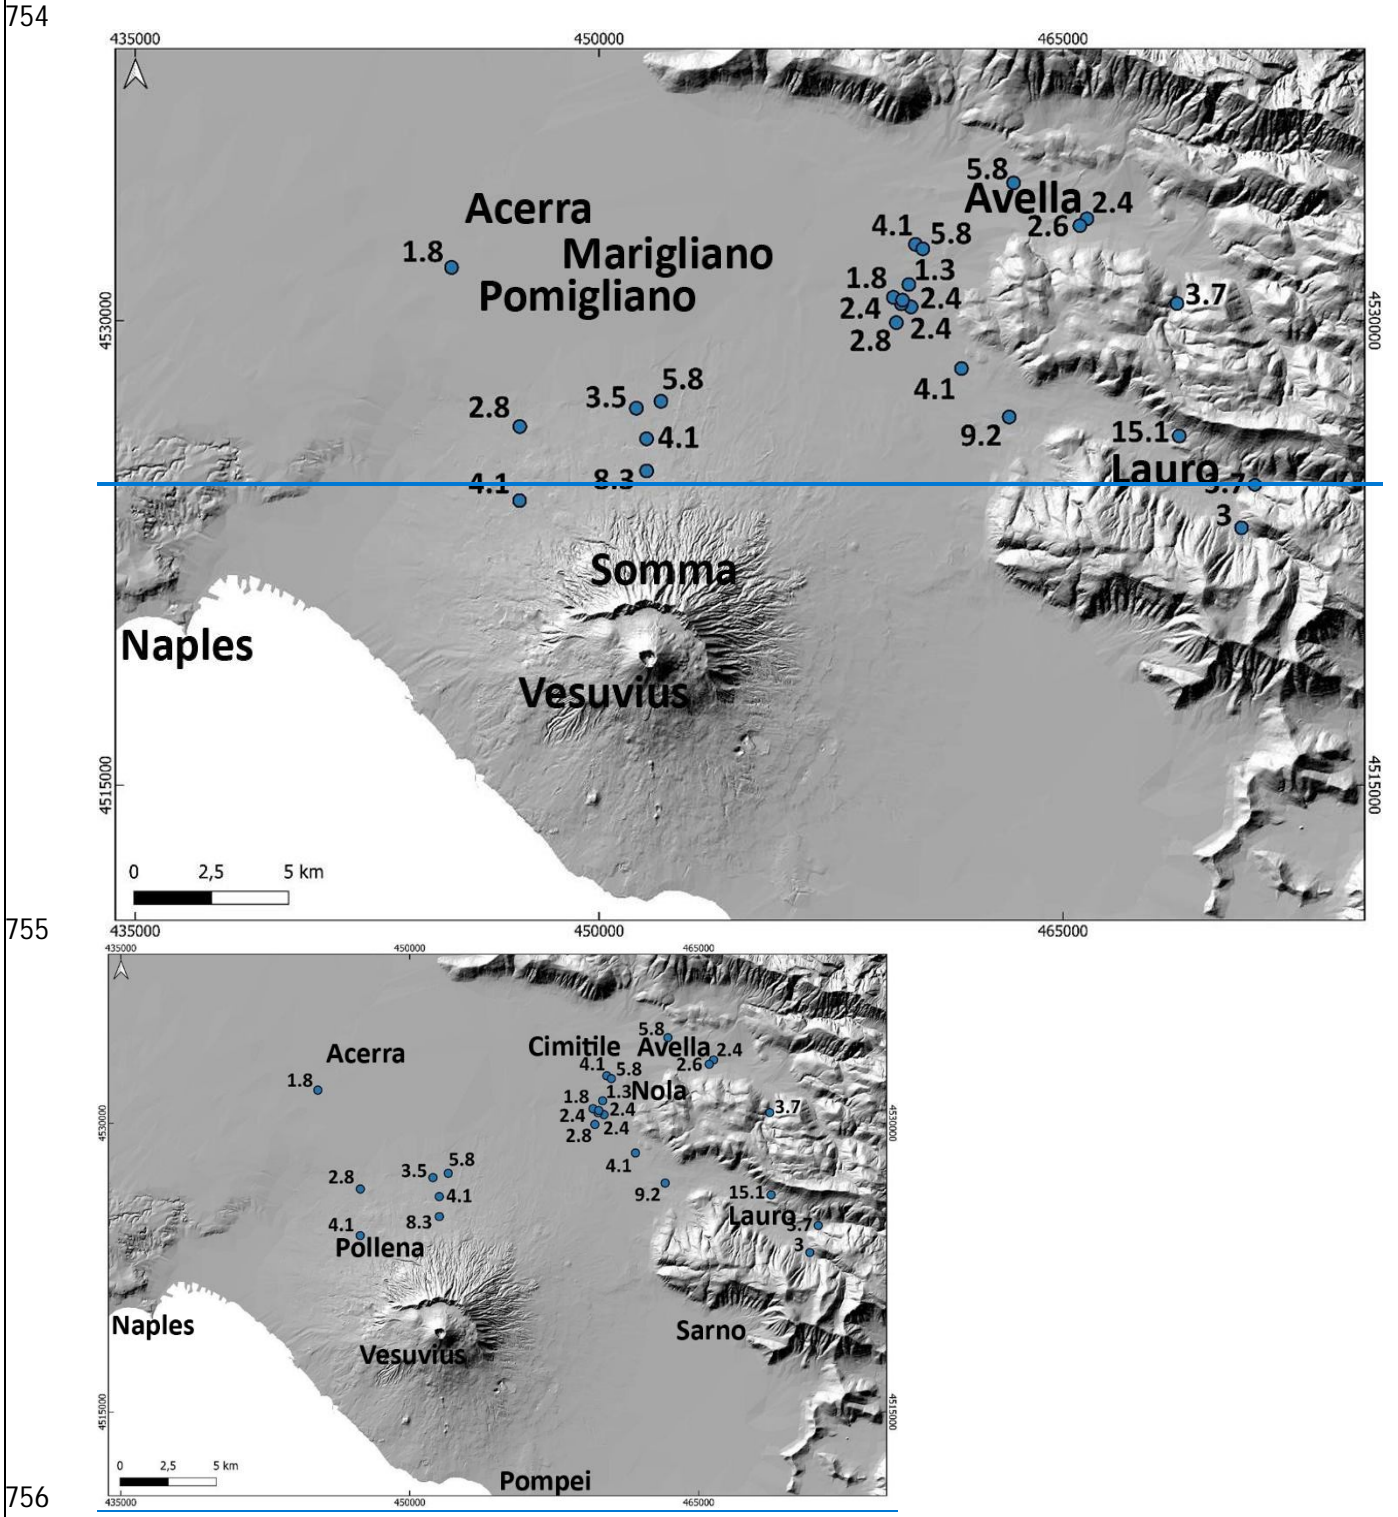

757 Fig. 176. Average lahar velocities (in m/s) estimated with a point-by-point reverse engineering approach.

758

759 Then, we used the flow velocities (Fig. 176) to calculate local dynamic pressures of the lahars (Fig.



760 187) as a function of the clast properties (size, density and shape). The obtained estimations are used  
 761 by Sandri et al. (submitted this issue) to validate the proBABilistic hazard assessment of lahars  
 762 from Vesuvius eruptions.  
 763

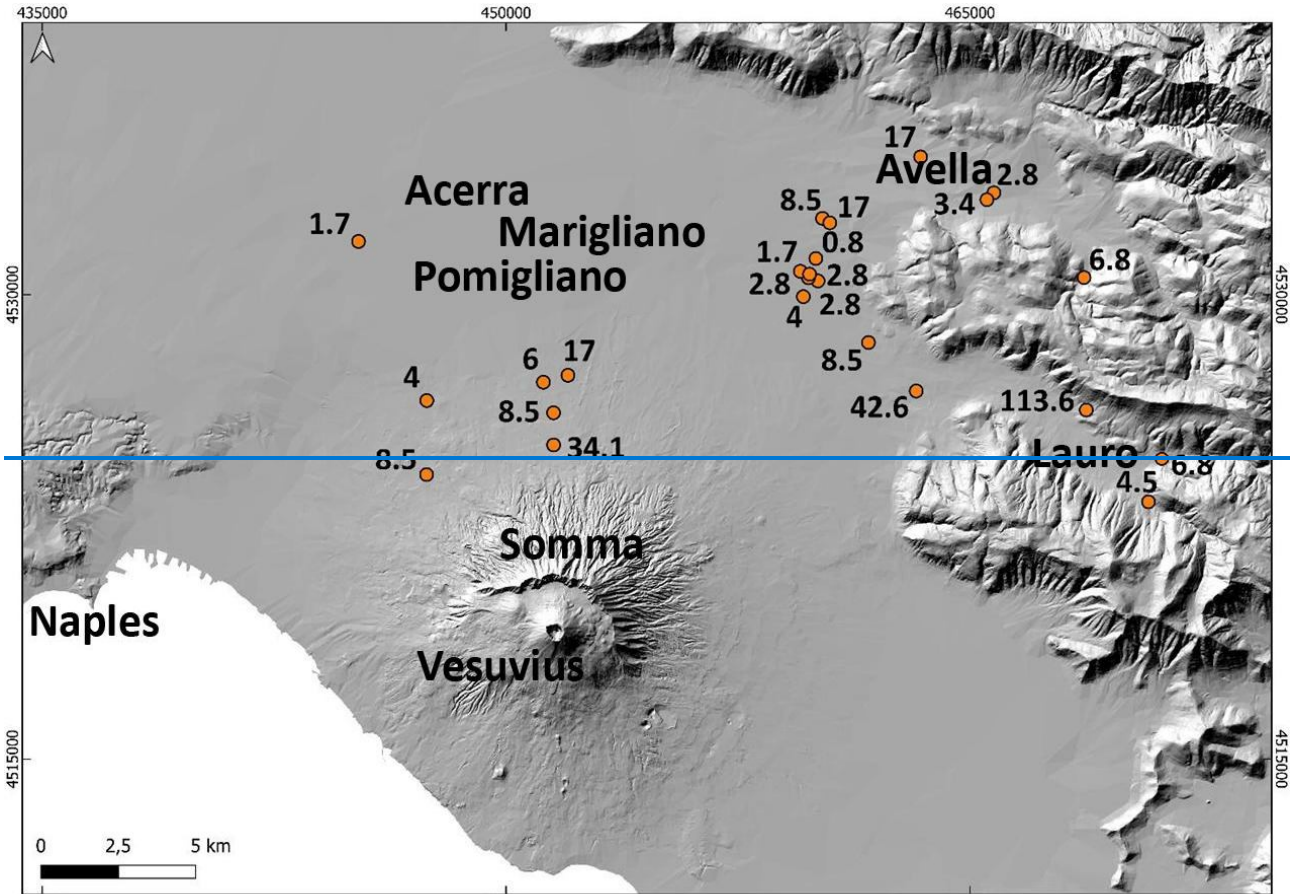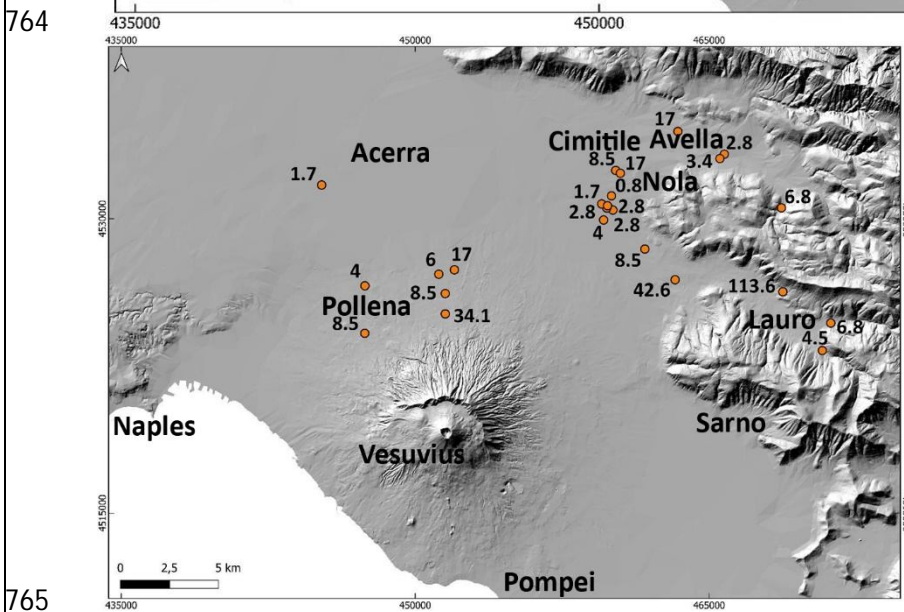

764  
 765  
 766 Fig. 187. Average lahar dynamic pressures (in kPa) estimated with a point-by-point reverse engineering approach.  
 767



768 The data presented in Figs. 176 and 187 represent ~~respectively~~ minimum local values of the flow  
769 velocity and dynamic pressure, respectively, useful to assess some minimum impact of the lahars in  
770 the alluvial plain. An approximation of this point-by-point approach is that the values were calculated  
771 for the finding locations of the clasts in the deposits, meaning that the values are overestimated for  
772 those exact locations, while they should more properly be referred to the immediate surroundings  
773 upstream. In particular, wWe did a parametric test to quantify the sensitivity for different physical  
774 states of the multiphase flow; depending on initial fluidization and flow density, and considering two  
775 end members, from a non-fluidized case to an initially fluidized and non-expanded case (see  
776 Appendix 4A; Roche et al., 2013). From the performed analysis (~~see Appendix 4~~), we found that the  
777 most typical values are referred to the initially fluidized and slightly expanded case (that is a few %  
778 more expanded than the non-expanded case), with most of the points falling in the range of velocity  
779 of 2-4 m/s, and dynamic pressure of 4-8 kPa.

780 Lastly, in eight ~~points-locations~~ we found the lahar deposits emplaced against meter-sized obstacles,  
781 from which we estimated, by comparison, local flow heights of the order of 1-1.5 m, and particle  
782 volumetric concentrations of ~30% or more, i.e. the deposit thickness is ~1/3 of the lahar thickness  
783 (cf. Capra et al., 2018). ~~On the other hand, it is reasonable to argue that these are local values, and~~  
784 ~~that flow height, particle concentration, and deposit thickness significantly varied over space due to~~  
785 ~~the multiphase nature of the lahars (see de' Michieli Vitturi et al., submitted; Sandri et al., submitted).~~

786

## 787 5. Discussion

788 The historical sources used as benchmark for ~~the problem of the~~ lahars around Somma-Vesuvius and  
789 in the Apennine valleys remark the frequent and broad impact that explosive eruptions of Vesuvius  
790 had in historical times. Some of the eruptions ~~occurred~~ in the last four centuries (e.g., 1631, 1822,  
791 1906 and 1944) ~~reached contemporaneously and repeatedly over time~~ impacted on a number of  
792 municipalities ~~due to the explosive character of the events~~, particularly ~~in~~ during the sub-Plinian

793 eruption of 1631. Heavy rain events caused remobilization of the primary pyroclastic deposits,  
794 triggering multiple lahars during or immediately after the eruption up to a few years (syn-eruptive  
795 lahars; Sulpizio et al., 2006); post-eruptive lahars were triggered on the longer term.

796 On the other hand, the 472-Pollena eruption had an even wider impact, both in terms of primary  
797 pyroclastic deposition and secondary (lahar) impact. For this event, the historical sources are scarce  
798 ~~or to~~ absent.

799 The analysis of – and realization of a database with – more than 500 stratigraphic sections were done,  
800 which also includes the sedimentological features ~~both~~ of ~~primary (fall, flows) and secondary (the~~  
801 ~~lahars, alluvial events)~~ deposits relative to the two sub-Plinian Vesuvius eruption case–studies ~~from~~  
802 Vesuvius, Pollena and 1631. The detailed reconstruction and mapping of ~~these~~ the primary deposits  
803 ~~allow an updating of the pyroclasts distribution on the territory~~ allowed to update the area affected by  
804 pyroclastic deposits dispersal, ~~as and it was found that~~ both ~~the~~ eruptions had an impact larger than  
805 previously known. In particular, the stratigraphic and sedimentological reconstruction of the deposits  
806 was done not only in ~~open space~~ the countryside but also close to urban areas, and this is important  
807 in terms of local impact of the lahars ~~vs. broad impact~~ in the environment. Specifically, such impact  
808 investigation was done in urban areas including archaeological findings (e.g., ~~villages, urban~~  
809 ~~structures, walls, etc...~~).

810 These findings include not only new data from the Somma-Vesuvius plain, but also more distal  
811 ~~deposits data~~ from Lauro Valley and Avella-Baiano Valley (Apennines), which were subjected to  
812 heavy remobilization ~~also~~ of the ~~finer~~ primary deposits ~~as for the presence of~~ including the widely-  
813 dispersed fine ash deposits ~~present in both proximal and distal areas~~ formed in the late stage of the  
814 eruptions. Indeed, the accumulation areas that were reconstructed reveal an enlargement and extra  
815 2047% (Pollena eruption) and 230% (1631 eruption) coverage that was not previously known ~~and~~,  
816 ~~considering the physical characteristics of the ash, it and this~~ should be considered in ~~any~~ the hazard  
817 and impact evaluation in the Campanian plain and on the nearby Apennine reliefs. The full database

818 ~~thus~~ allows a more precise reconstruction of the new isopachs, both for the Pollena and 1631  
819 eruptions, which is possible given the high number of data points in the study area.

820 With particular reference to the lahar deposits, the syn-eruptive ones ~~that were emplaced~~occurred by  
821 relatively short-term (during or immediately after the eruption) events, ~~stand and were~~ directly  
822 emplaced on the primary pyroclastic deposits, both for the Pollena and 1631 eruptions ~~case studies~~.

823 Also, there are not any significant erosion surfaces nor humification traces in the sequences due to  
824 prolonged exposure of the primary deposits, testifying that the secondary emplacement was quite  
825 immediate (max a few years; Sulpizio et al., 2006) after or even during the eruption. The syn-eruptive  
826 features ~~of these deposits~~ are also testified by the absence of ~~anthropic~~ anthropogenic traces or  
827 humified surfaces at the base of or within ~~interbedded in~~ the ~~deposits~~ lahar deposits, as further  
828 evidence of a very short-term time span between the eruptions and the lahar events. ~~Another~~  
829 interesting features ~~are~~ is the presence of multiple depositional flow units in the lahar deposits, as  
830 evidenced by granulometric grain-size changes, some clast alignments and concave erosion surfaces  
831 ~~inside~~ within the ~~lahar deposits~~ lahar deposits. Such flow-depositional units were ~~emplaced~~ formed by  
832 en-masse ~~deposition-emplacement~~ (with reference to ~~each single~~ flow pulse), while the whole lahar  
833 deposits were formed by rapid progressive aggradation of the various flow units (Vallance and Scott,  
834 1997; Doronzo, 2012; Roche, 2012; Smith et al., 2018; Martí et al., 2019; Guzman et al., 2020; see  
835 also Sulpizio et al., 2014, p. 56), which does not contradict the principle of superposition, and this ~~This~~  
836 can be argued by the generally massive facies of each flow unit in the deposits, and by the presence  
837 of water escape structures that cross vertically the entire ~~lahar deposits~~ sequences. ~~The~~ is latter  
838 evidence testifies a rapid ~~and contemporaneous~~ water loss through vertical escaping “pipes” during  
839 or soon after the emplacement-aggradation of the sequences. In other words, the various flow units  
840 (layers) must decouple from the transport system, and such decoupling occurs unit-by-unit and not  
841 particle-by-particle (Sulpizio et al., 2006, 2014; Roche, 2012; Doronzo and Dellino, 2013; Breard  
842 and Lube, 2017; Smith et al., 2018), through a massive accumulation rate (Duller et al., 2008;  
843 Doronzo et al., 2012; Martí et al., 2019).

844 The analysis of the Pollena lahar lithofacies allowed the identification of ~~mainly~~ two main deposit  
845 categories. The first one occurs ~~over~~ on an area that extends for more than 10 km north of Mount  
846 Somma, and the second one occurs on an area ~~which~~ that extends west of the Apennines. For the  
847 latter, we can recognize two significant sub-categories of deposits, corresponding to the main valleys  
848 in northwest-southeast direction, Avella-Baiano Valley and Lauro Valley. ~~The~~ is difference between  
849 the first and the second deposit categories seems to reflect the type of primary deposits that ~~was~~ were  
850 remobilized ~~and~~ (~~just~~ fine ash vs. ash and lapilli). ~~In the first area Avella-Baiano Valley~~ the area north  
851 of Mount Somma, which also comprises the municipalities of Acerra and Afragola (about 12 km from  
852 Somma-Vesuvius), the primary lapilli fallout deposits ~~is in fact not deposited~~ are absent, ~~while~~ On  
853 ~~the other hand~~ In this part of the plain, there is almost always a very thin level layer of  
854 phreatomagmatic ash is widely present in the pPlain, while ~~and~~ thick, fine-grained pyroclastic current  
855 deposits are present in the ~~Mt.~~ Mount Somma valleys ~~feeding the lahars~~ that fed some of the lahars.  
856 ~~The other basin comprises many~~ In Avella-Baiano Valley and Lauro Valley, which also comprises the  
857 municipalities ~~in the area~~ around Nola at 10-15 km from Apennine source valleys (Fig. 1 and  
858 Appendix 3C), ~~where~~ the lahar deposits are generally coarser, and consist of multiple depositional  
859 units with different lithofacies (Tab. 3). In this case, both granulometry grain-size and componentry  
860 indicate ~~the~~ that lahar deposits resulted from the remobilization of the fallout deposits. Such  
861 considerations also derive from the full compilation of the geospatial database. A volume estimation  
862 of the remobilized syn-eruptive deposits, based on a QGIS calculation, is of  $73 \times 10^6$  m<sup>3</sup> for the  
863 northern Vesuvius area, and  $42 \times 10^6$  m<sup>3</sup> for the Lauro Valley.

864 Referring to the 1631 eruption, previous maps have shown the distribution of the 1631 lahar deposits  
865 toward east, basically following the distribution of the primary pyroclastic fall deposits (Sulpizio et  
866 al., 2006), while in Figs. 109 and 110 we show a significantly larger distribution area particularly  
867 toward the north (Somma-Vesuvius ramps and pPlain) and east (~~mountain~~ Apennines valleys), and  
868 less toward the SE southeast. In particular, this distribution is well explained by the wide distribution



869 of the ash fallout deposit toward both north and northeast (Fig. 6), remobilized during the lahar  
870 generation ~~along~~ both from the Mount Somma and Apennine slopes. On the other hand, looking at  
871 the average deposit thicknesses, they reach ~~on average~~ half a meter ~~to in~~ the N-north and NE-northeast,  
872 while ~~reaching~~ a couple of meters in some ~~points-locations~~ ~~to in~~ the NE-northeast (aligned with the  
873 dispersion axis of the primary fallout deposits and out of the Apennine valleys).

874 The sedimentological analyses carried out on a number of samples from the different studied sectors  
875 (Somma-Vesuvius, Lauro Valley, Avella-Baiano Valley) are useful for discriminating the various  
876 factors that contributed to the initiation of the lahars and emplacement of their ~~lahar~~-deposits. The  
877 samples ~~for from~~ Lauro Valley and Avella-Baiano Valley are coarser (but have a significant finer  
878 tail) than the ones for Somma-Vesuvius, and this can depend on three factors: i) depositional  
879 meehanismsgenetic types of the primary pyroclastic deposits (fall vs. flow); ii) interaction between  
880 lahars and morphology (valley vs. plain); iii) major ~~involvement-remobilization~~ ~~for in~~ Lauro Valley  
881 and Avella-Baiano Valley of the distal ~~fine~~-phreatomagmatic fine ash deposits formed in the ~~final-late~~  
882 eruptions stages. In other words, the primary grain sizes involved in the remobilization (finer and  
883 higher-water retention for Somma-Vesuvius), as well as the general topography (gentler but longer  
884 ramp for Somma-Vesuvius) likely acted as the main factors directly impacting the distribution of the  
885 lahar deposits, and the decay of the flow velocities and dynamic pressures in the area.

886 Interestingly, an emplacement temperature ~~of (~120 °C)~~ of the lahar deposits was calculated for those  
887 generated along the Somma-Vesuvius slopes, indicating a relatively hot provenance after  
888 remobilization of the pyroclastic current deposits. Instead, the remobilization from the Apennines  
889 sectors involved only cold fallout deposits. [The companion paper of de'Michieli Vitturi et al. \(this](#)  
890 [issue\) investigates also the nexus between water temperature, flow viscosity, and their consequential](#)  
891 [impact on fluid dynamics. Specifically, when the dominance of frictional forces is attributable to the](#)  
892 [yield slope term, the initial divergence between high- and low-temperature scenarios appears](#)  
893 [negligible. However, discernible dissimilarity appears over time for the inundation area of the colder](#)

894 flow case (i.e., 27 °C) with respect to the warmer counterpart (i.e., 100 °C), the latter case being close  
895 to the 120 °C one reported from paleomagnetism. Remarkably, the temperature-induced variations  
896 assume a pivotal role in shaping the dynamic characteristics of the hotter flow. The diminished  
897 viscosity associated with elevated temperatures not only amplifies fluid mobility but also prompts a  
898 notable acceleration in sediment settling velocity. This, in turn, initiates a debulking mechanism,  
899 thereby intensifying overall flow mobility. Consequently, this intricate interplay contributes to a  
900 reduced footprint of deposited material from the flow, altering the spatial distribution of sediments.  
901 However, the overall impact on the inundation area is typically quite reduced, being typically less  
902 than 10-20% even considering a thickness threshold of 1 mm (see de' Michieli Vitturi et al., this issue).  
903 The sampled clasts might have been incorporated multiple times by the flows, and the heating/cooling  
904 processes that we interpret as indicating  $T_{dep}$  in the diagrams are the last to have occurred and affected  
905 the samples. Besides, a third heating component is clearly observed for some of them. The  
906 paleomagnetic ~~data directions of flow direction are statistically distinguishable also indicate,~~  
907 supporting that the lahar emplacement at Nola (10-15 km from Apennine source valleys) and Acerra  
908 (12 km from Somma-Vesuvius) was not synchronous, as ~~a~~ further evidence of the different timing  
909 ~~and hence likely different~~ detachment areas involved during the pyroclasts remobilization. However,  
910 the comparison with the paleosecular variation curves of the Earth's magnetic field does not allow to  
911 better constrain the entity of the time span between the two lahar events. The parental lahars acted as  
912 mass flows capable of entraining outsized clasts (where available) from substrate under the action of  
913 shallow-layer flow velocity and dynamic pressure (de' Michieli Vitturi et al., this issue), then  
914 emplaced massive flow units with uplifted external clasts set into the much finer matrix (see Roche,  
915 2015). In ~~various-some~~ lahar units, ~~multiple-various~~ clasts have been found, showing some alignment  
916 that depends on the mechanisms of entrainment and uplift (with respect to substrate) within the flow.

917 In terms of local impact in the Pollena case study (the largest one), while most of the calculated points  
918 (44) fall in the range of lahar velocity of 2-4 m/s and dynamic pressure of 4-8 kPa, a few peak values

919 of velocity of 13-15 m/s and dynamic pressure of 90-115 kPa are also calculated, which are directly  
920 related to meter-sized clasts entrained into the lahars on the steep slopes, then deposited downstream  
921 of alluvial fans. Such values of the velocity and dynamic pressure are well comparable with those  
922 calculated for lahars that occurred recently at Ruapehu in 2007 (Lube et al., 2012) and Merapi in 2011  
923 (Jenkins et al., 2015), and in historical times at El Misti (Thouret et al., 2022). In particular, the  
924 estimated velocities and pressure agree with those of Lube et al. (2012) and Jenkins et al. (2015).  
925 Moreover, multiplying velocity and density gives a power per unit surface, so those most  
926 representative values correspond to a flow power per unit surface of  $8 \cdot 10^3 - 3.2 \cdot 10^4 \text{ W/m}^2$ , with peak  
927 values of  $1.17 \cdot 10^6 - 1.72 \cdot 10^6 \text{ W/m}^2$ , in agreement with typical values reported for floods and  
928 megafloods (Russell and Knudsen, 1999; Whipple et al., 2000; Carling, 2013).

929

## 930 **6. Conclusions**

931 ~~A number of points can be highlighted after the~~The integration of the historical, stratigraphic,  
932 sedimentological, laboratory, and impact parameter analyses carried out in the Vesuvius area allow  
933 us updating on the lahar invasion related to ~~for~~ the Pollena and 1631 eruptions. In general, the physical  
934 characteristics of the analyzed deposits indicate that syn-eruptive lahars are related to the rapid  
935 remobilization of large volumes of pyroclastic material, which is mainly fine-grained and almost  
936 exclusively derived from the accumulation of products related to a single eruption. The analysis also  
937 shows that tardive (post-eruptive) mass flows are common, and involve multiple and variably altered  
938 deposits, and that their energy and frequency are progressively lower over time, after the last eruption  
939 has occurred. In particular, a higher impact both from primary and secondary phenomena is  
940 something that should be accounted in the Vesuvius area and that;

- 941 i) The new isopach maps of the Pollena and 1631 eruptions allow us to infer a larger impact  
942 than previously known for these two sub-Plinian events of the Vesuvius. Thus, it is worth  
943 reconsidering the territorial impact that sub-Plinian eruptions can have in the Vesuvius

- 944 (but not only) area. In particular, the ash deposits can have a high impact in relation to  
945 their high density and low permeability.
- 946 ii) The primary impact from fallout and pyroclastic current processes in the Vesuvius area  
947 was - and may be in the future – followed by the secondary impact from lahars generated  
948 during or immediately after the eruption events. Both impacts can have a wide distribution,  
949 because they are directly controlled by the primary deposits distributions, both around  
950 Somma-Vesuvius and in the Apennines valleys.
- 951 iii) The runouts of such lahars were significant both for the Pollena and 1631 eruptions, by  
952 reaching distances of 10 to 15 km from the sources, and their deposits geometry is tabular-  
953 like with average thicknesses of 0.5 to 1 m.
- 954 iv) The paleotemperature data highlight a relatively hot dynamics (~120 °C) for those lahar  
955 flow pulses that traveled along-down the Somma-Vesuvius slopes because of pyroclastic  
956 current deposit remobilization. This did not occur from the Apennines sectors, where  
957 pyroclastic currents did not get to, and only cold fallout deposits were remobilized.
- 958 v) A reverse engineering approach allowed to calculate the local lahar velocities (2-4 m/s,  
959 with peaks of 13-15 m/s), dynamic pressures (4-8 kPa, with peaks of 90-115 kPa), and  
960 solid volumetric concentration (~30%, implying a 1:3 ratio between deposit and flow  
961 thickness), on the basis of the external clast properties entrained into the flows then  
962 emplaced into the ash matrix, and on the presence of the lahar deposits in proximity of  
963 obstacles and archaeological findings.

964 As a general conclusion, we have demonstrated that the areal impact of both primary deposits and  
965 lahars, in case of sub-Plinian events at Somma-Vesuvius, involves a territory wider than  
966 previously known and for several years, with possible decreasing damages over time.

967

968 **Appendix A. Calculation of lahar velocities and dynamic pressures**



969 A theoretical scheme is presented to quantify local velocities and dynamic pressures of the lahars, by  
970 inverting the field features at selected locations. The final goal is to map the values of velocity and  
971 dynamic pressure to assessing the hazard from lahars in the study area. Flow dynamic pressure,  $P_{dyn}$ ,  
972 results from a combination of flow density,  $\rho_f$ , and flow velocity,  $v$ , and is defined as follows

$$973 \quad P_{dyn} = 0.5\rho_f v^2 \quad (A1)$$

974 In the study area, the original flow was a multiphase flow of water + pyroclastic sediment, which  
975 during remobilization evolved into a flow of water + pyroclastic sediment + external clasts.  
976 Generically, flow density results from a combination of particle density,  $\rho_p$ , and water density,  $\rho_w$ ,  
977 through particle volume concentration,  $C$ , and is defined as follows

$$978 \quad \rho_f = \rho_p C + \rho_w (1 - C) \quad (A2)$$

979 In order to define flow velocity, we take into account stratigraphic and sedimentological  
980 characteristics of the lahar deposits flow units: i) they are ubiquitously massive, and result from  
981 remobilization of the primary pyroclastic deposits then emplacement from mass flows; ii) they  
982 contain big external clasts entrained (by dynamic pressure) and uplifted (also by pore pressure) from  
983 substrate into the flows. With these field characteristics, flow velocity can be expressed as a  
984 combination of entrained clast properties and flow density, and is defined as follows (modified after  
985 Roche, 2015)

$$986 \quad v = \sqrt{\frac{X\Psi(\rho_c - \rho_w)g}{\gamma\rho_f}} \quad (A3)$$

987 where  $X$  is clast small axis,  $\Psi$  is clast shape factor,  $\rho_c$  is clast density,  $g$  is gravity acceleration and  $\gamma$   
988 is an empirical constant. Eq. 3 allows quantifying the incipient motion of the big clasts, and gives  
989 minimum values of flow velocity required to entrain and uplift the clasts from substrate, possibly  
990 probably more than once, before being emplaced into the lahar deposits by flow velocity drop. Such  
991 equation has been originally derived in laboratory experiments for a multiphase flow of air +  
992 sediment, and is highly performing at  $\rho_f \sim 1000 \text{ kg/m}^3$  (hindered settling) for dense pyroclastic

993 currents controlled by topography then opened to alluvial plain (Martí et al., 2019), which is a case  
994 similar to the lahars in the study area. Substituting Eq. 3 into Eq. 1 and simplifying gives

$$995 \quad P_{dyn} = 0.5 \frac{X\psi(\rho_c - \rho_w)g}{\gamma} \quad (A4)$$

996 For given clast properties, flow dynamic pressure has a unique value, while flow velocity is a function  
997 of flow density. Indeed, the present scheme is a spot model that basically depends on, and is limited  
998 to, the finding of big clasts and boulders within the lahar deposits. An approximation is that velocity  
999 and dynamic pressure are calculated for the locations where the clasts are found in the deposits,  
1000 meaning that the calculated values are overestimated for those exact locations, while they are more  
1001 properly referred to the immediate surroundings upstream.

1002 At the selected locations in the study area, we collected the dimensions of the biggest clasts found in  
1003 the lahar deposits, and we characterized ~~petrographically~~lithologically the clasts in the field, to  
1004 calculate flow dynamic pressures using Eq. 4. We used the following values for the various  
1005 parameters in the calculations:  $\Psi$  (ellipsoid) = 0.66;  $\rho_c$  (limestone) = 2500 kg/m<sup>3</sup>;  $\rho_c$  (ceramic) = 2000  
1006 kg/m<sup>3</sup>;  $\rho_c$  (brick) = 2000 kg/m<sup>3</sup>;  $\rho_c$  (tephra) = 1500 kg/m<sup>3</sup>;  $\rho_c$  (lava) = 2500 kg/m<sup>3</sup>;  $\rho_c$  (iron) = 8000  
1007 kg/m<sup>3</sup>;  $\rho_w$  = 1000 kg/m<sup>3</sup>;  $g$  = 9.81 m/s<sup>2</sup>;  $\gamma$  = 0.031 – 0.071. Also, we calculated flow velocities using  
1008 Eq. 3, in the following range of flow density:  $\rho_w \leq \rho_f \leq \rho_p$ , where  $\rho_w$  = 1000 kg/m<sup>3</sup> and  $\rho_p$  = 2000  
1009 kg/m<sup>3</sup>. In this way, flow density spans from two extreme cases: i)  $\rho_f = \rho_w$ , negligible pyroclastic  
1010 sediment and external clasts, so water flow only; ii)  $\rho_f = \rho_p$ , negligible water and dominant pyroclastic  
1011 sediment, so ash flow only. For the empirical constant in Eq. 3, we used three different values to test  
1012 the sensitivity with respect to different physical states of the multiphase flow:  $\gamma$  (non-fluidized) =  
1013 0.031;  $\gamma$  (initially fluidized and slightly expanded) = 0.057;  $\gamma$  (initially fluidized and non-expanded)  
1014 = 0.071 (see Roche et al., 2013; Fig. A1).

1015 Regarding flow velocity, after calculation we can rewrite Eq. 3 in a simpler form (to more directly  
1016 relate velocity to density) as follows

1017 
$$v = \frac{a}{\sqrt{\rho_f}} \tag{A5}$$

1018 where  $a > 0$  depends on clast properties, and its square has dimension of pressure. On the other hand,  
 1019 it is not straightforward to constrain local flow velocities with unique values of flow densities, mostly  
 1020 because small variations of velocity correspond to large variations of density, and this is particularly  
 1021 valid for volcanoclastic mass flows (Carling, 2013; Jenkins et al., 2015; Roche, 2015; Martí et al.,  
 1022 2019; Guzman et al., 2020; Thouret et al., 2022).

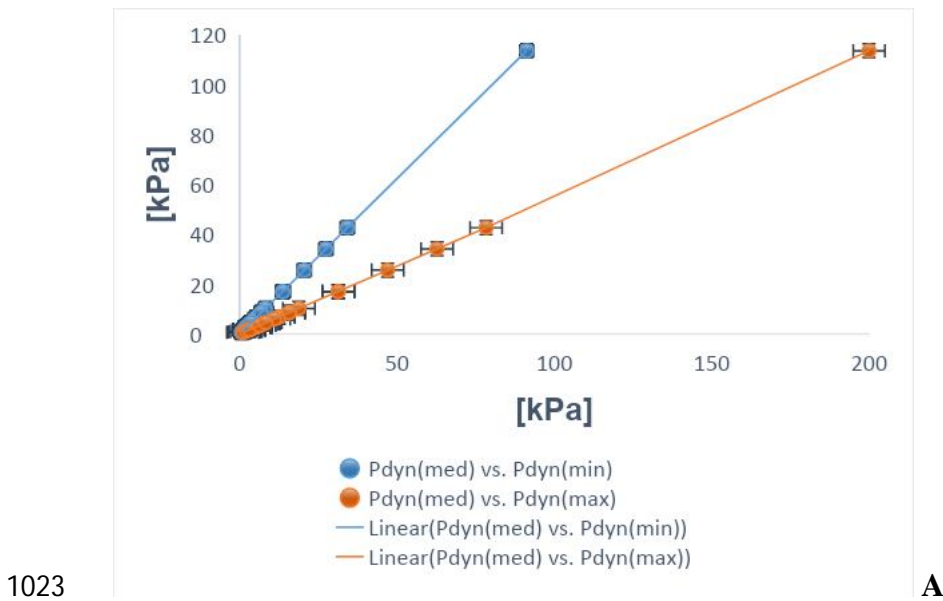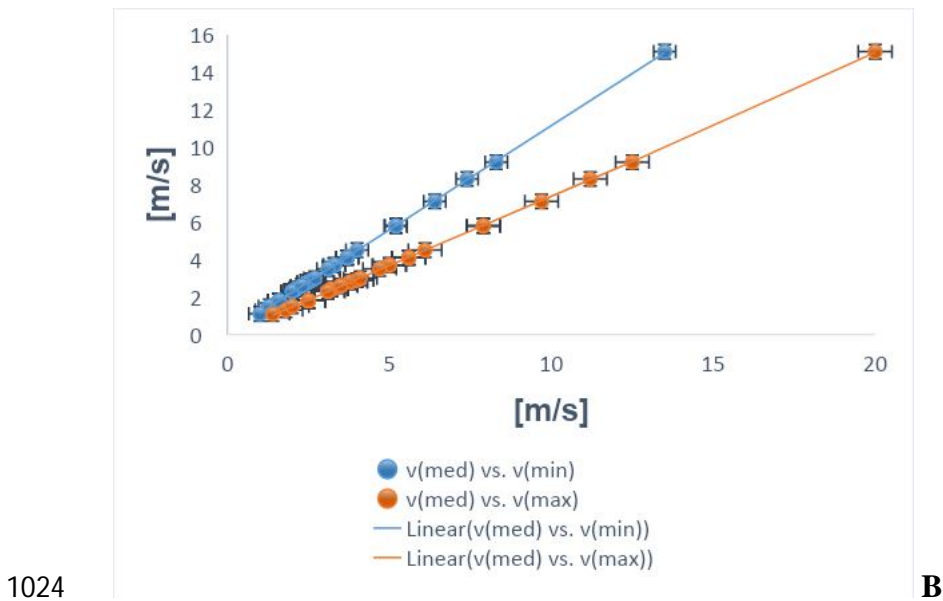

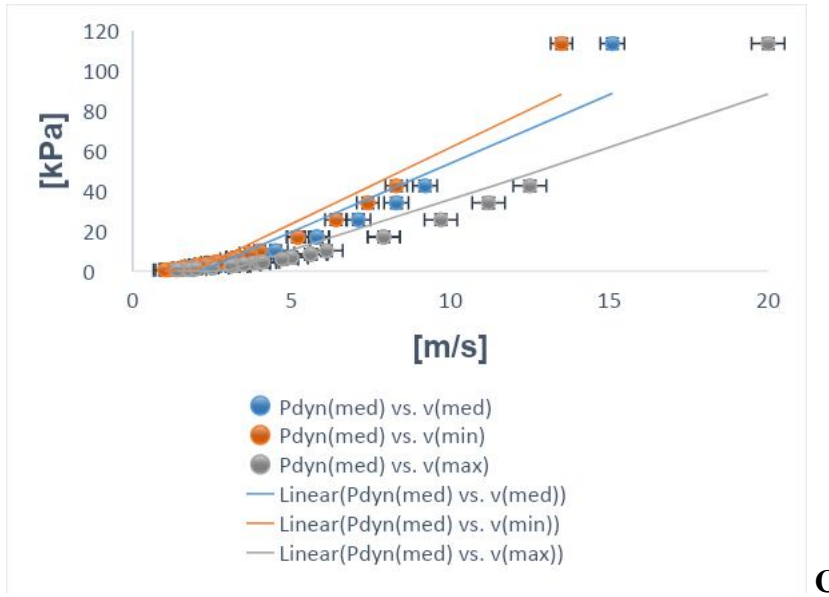

1025

1026

1027

1028

1029

1030

1031

1032

1033

1034

1035

1036

1037

1038

1039

1040

1041

1042

Fig. A1. [Local dynamic pressures and velocities for the syn- and post-eruptive Pollena lahars calculated with the reverse engineering approach](#). **A**, dynamic pressure for the initially-fluidized and slightly expanded case vs. dynamic pressure for the initially-fluidized and non-expanded (blue) and non-fluidized (orange) cases; **B**, velocity for the initially-fluidized and slightly expanded case vs. velocity for the initially-fluidized and non-expanded (blue) and non-fluidized (orange) cases; **C**, dynamic pressure for the initially-fluidized and slightly expanded case vs. velocity for the initially-fluidized and slightly expanded (blue), vs. velocity for the initially-fluidized and non-expanded (orange), vs. velocity for the non-fluidized (grey) cases.

At some locations in the study area, we found lahar deposits against meter-scale manufacturing obstacles (Di Vito et al., 2009). The peculiarity is that the deposits in proximity of the obstacles are thicker than the correlated ones in the free field, but never reach the top of the obstacles themselves. This means that the lahars were not much expanded, so unable to overcome the obstacles as stratified flows would have done (cf. Spence et al., 2004; Gurioli et al., 2005; Doronzo, 2013; Breard et al., 2015). With this field evidence, we can assume that local flow height,  $H$ , was similar to deposit thickness against the obstacle,  $h_o$ , as follows

$$H \approx h_o \tag{A6}$$

In order to estimate flow density using Eq. 2, we focus on particle volumetric concentration. For well-



1043 sorted deposits, such concentration can be defined with an average value over flow height as follows  
1044 (modified after Doronzo and Dellino, 2013; see also Eq. 30 in de' Michieli Vitturi et al., [submitted this](#)  
1045 [issue](#))

$$1046 \quad C = \frac{h_f}{H} \quad (A7)$$

1047 where  $h_f$  is deposit thickness in the free field. Substituting Eq. 6 into Eq. 7 gives

$$1048 \quad C \approx \frac{h_f}{h_o} \quad (A8)$$

1049 In particular,  $h_f$  refers to those lahar deposits relatively close to the obstacles, but which were not  
1050 affected by them during emplacement, i.e. close but not so much. We assessed that correlation taking  
1051 into account the stratigraphic and sedimentological characteristics of the lahar deposits, and the fact  
1052 that Eq. 7 performs better with layers emplaced after remobilization of primary pyroclastic fallout or  
1053 dominantly ash flow deposits.

1054 Lastly, we macroscopically assessed erosion in the field, by characterizing the unconformities present  
1055 both on the primary pyroclastic and lahar deposits. In particular, the syn-eruptive lahar deposits  
1056 consist of more than one flow unit, so it is important to understand how the different flow pulses  
1057 interacted with each other during emplacement. The main unconformities that are found in the field  
1058 are referred to the partial absence of a flow unit, and the loss of lateral continuity despite some flat  
1059 geometry of the deposits. On the other hand, at some locations we were not able to assess if erosion  
1060 occurred or not due to multiple open issues: i) [eventual-possible](#) absence of the primary pyroclastic  
1061 deposits; ii) [eventual-possible](#) exclusive presence of the post-eruptive lahar deposits; iii) impossibility  
1062 to get to some outcropping deposit base and [eventual-possible](#) unconformities.

1063

## 1064 **Appendix B. Paleo-temperature and paleo-direction determinations**

1065 The magnetic fabric of a deposit was investigated by measurements of the magnetic susceptibility  
1066 and its anisotropy (AMS). AMS was measured with a Kappabridge KLY-3 (AGICO), and data were  
1067 elaborated by the software Anisoft5 (AGICO). AMS depends on the type, concentration, and  
1068 distribution of all the minerals within the specimen. It is geometrically described by a triaxial  
1069 ellipsoid, whose axes coincide with the maximum ( $k_1$ ), intermediate ( $k_2$ ) and minimum ( $k_3$ )  
1070 susceptibility directions. The magnetic fabric of a specimen is then described by the direction of the  
1071  $k_1$  axis, the magnetic lineation (L) and that of the  $k_3$  axis, which is parallel to the pole of the magnetic  
1072 foliation plane (F). Besides, the modulus of the susceptibility axes provides some magnetic  
1073 parameters useful to express the intensity of the anisotropy ( $P_j$ ) and the oblate/prolate fabric  
1074 occurrence (T) (Jelinek, 1981). Generally, sedimentary vs. pyroclastic deposits fabric, here  
1075 considered as the proxy of the lahar fabric, is oblate with a horizontal to gently imbricated (less than  
1076  $20^\circ$ ) magnetic foliation. The magnetic lineation is normally clustered along the foliation plunge. In  
1077 this case, both the F imbrication and the L direction can provide the local flow direction. Other times,  
1078 L is orthogonal to the F plunge or F is statistically horizontal, and it is not possible to infer the flow  
1079 direction.

1080 For  $T_{dep}$  estimation, pottery sherds were subjected to progressive thermal demagnetization (PTD),  
1081 with heating steps of  $40^\circ\text{C}$ , up to the Curie Temperature ( $T_C$ ), using the Schonstedt furnace and the  
1082 spinner magnetometer JR6 (AGICO). The rationale of the method has been described in detail in  
1083 several papers (McClelland and Druitt, 1989; Bardot, 2000; Porreca, 2007; Paterson et al., 2010; Lesti  
1084 et al., 2011), many of them dedicated to PDCs of the [Vesuvian-Vesuvius](#) area (Cioni et al., 2004; Di  
1085 Vito et al., 2009; Giordano et al., 2018; Zanella et al., 2007; 2018; 2015). Typically, measurements  
1086 are made on accidental lava lithics that were entrained during pyroclastic or lahar flows. In this case,  
1087 we had the opportunity to estimate the  $T_{dep}$  by measuring ancient pottery artifacts. Briefly, pottery is  
1088 characterized by a thermal remanent magnetization (TRM) acquired during its manufacture and its  
1089 subsequent history of daily use. Whenever it is heated, part of its TRM, the one associated with  
1090 blocking temperatures ( $T_b$ ) below the heating one ( $T_h$ ), is overwritten. Without alteration phenomena,

1091 the heating/cooling is a reversible process, except for the magnetic directions. The original TRM  
1092 shows a random paleomagnetic direction, due to the transport during emplacement. Subsequent  
1093 TRMs show directions parallel to the Earth's magnetic field during their cooling. This is clearly  
1094 illustrated in the Zijderveld diagrams. The composition of the different magnetization components  
1095 reveals thermal intervals characteristic of the heating history of the potsherd. Of course, this  
1096 explanation is simplified, but the method is well-established and has been shown to work well with  
1097 heated artifacts, such in the case of tiles and pottery embedded in the PDC deposits at Pompeii  
1098 (Gurioli et al., 2005; Zanella et al., 2007), Afragola (Di Vito et al., 2009) and Santorini (Tema et al.,  
1099 2015). In case of lahar, we expect low  $T_{dep}$  or cold deposits. This can be a major concern because of  
1100 the difficulties to distinguish between the TRM secondary components, and the chemical (CRM) and  
1101 viscous (VRM) remanent magnetization. The CRM may develop due to mineralogical changes during  
1102 reheating (McClelland, 1996). Instead, VRM is typical of ferromagnetic grains with low  $T_b$  and often  
1103 occurs in most rocks. Following Bardot and McClelland (2000) relationship for time intervals in the  
1104  $10^2$ – $10^6$  year range,  $T_b = 75 + 15 \log$  (acquisition time in years), and using the Pollena eruption date  
1105 (472 [ADCE](#)), we obtain a lower limit of the  $T_b$  around 123 °C. This means that this temperature helps  
1106 us in discriminating between “hot” ( $T_b > 120$  °C) or “cold” lahar ( $T_b < 120$  °C).

1107 Finally, routine magnetic measurements on the lahar matrix were done on the lahar matrix to  
1108 determine the Characteristic Remanent Magnetization (ChRM) by Thermal and Alternating Field  
1109 demagnetizations. The direction of the Earth's Magnetic Field during the Pollena eruption is well-  
1110 known (Zanella et al., 2008). If the sampled lahars were emplaced shortly after the eruption, both the  
1111 secondary TRMs and the matrix of the lahars should show a remanent magnetization direction similar  
1112 to the Pollena ones. ChRMs can also test if the two lahars (Acerra [at 12 km from Somma-Vesuvius](#),  
1113 and Nola [at 10-15 km from Apennine source valleys](#)) are coeval.

## 1115 **Appendix C. Description of the studied areas**

1116 *Area I – Nola*

1117 In the area surrounding Nola ([10-15 km from Apennine source valleys](#)), it is possible to recognize  
1118 the complete fallout sequence of the Pollena eruption (a in [Ffig. C1 and C2](#)), which usually covers  
1119 ploughed soils (p in [Ffig C1](#)) and late Roman archaeological remains. The sequence is composed [by](#)  
1120 [of](#) an alternation of coarse pumice and thin ash fallout layers. Its top is always made of a [cohesive](#)  
1121 [fine](#) ash bed related to the phreatomagmatic phase of the eruption (b in [Ffig. C1 and C2](#)), with a  
1122 thickness ranging from 1 to 14 cm due to erosion. They are almost always overlain by lahar deposits  
1123 composed of several flow units (c in [Ffig. C1 and C2](#)) with a large thickness variability due to  
1124 channeling and presence of barriers and [edificesbuildings](#). They sometimes include blocks, tiles, and  
1125 other archaeological remains.

1126 In Fig. C1, above the primary deposit, there is an example of a well-exposed sequence composed [by](#)  
1127 [of](#) at least five units (c in [Ffig. C1](#)). The first one is a massive and matrix-supported deposit composed  
1128 [by-of](#) fine and not vesiculated ash (lithofacies Gms), with fragments of greenish to blackish scoriae  
1129 and minor fragments of pumices, lavas and limestones. The fragments are cm-sized and are both  
1130 angular and rounded. The second flow unit is similar to the one below, but is darker and contains less  
1131 coarse fragments. Its matrix is composed [by-of](#) an alternation of fine to medium ash [layers](#). It follows  
1132 a plane-parallel sequence of well-sorted fine sand and silt layers characterized by the lithofacies fM.  
1133 A massive deposit follows upward, it is progressively humified and contains abundant reworked and  
1134 rounded pumice [clasts](#) from the Avellino eruption. The top humified surface is almost always eroded  
1135 by anthropogenic activity and is generally ploughed (p1 in Fig. [C21](#)), ~~whose surface. It~~ is overlain by  
1136 the primary deposits of the [1631](#) eruption ~~of 1631~~ (d in Fig. C2). It is few cm thick and is composed  
1137 [by-of](#) a basal layer of dark coarse ash (small pumice fragments), overlain by a ~~very cohesive and~~  
1138 massive ash bed, containing abundant accretionary lapilli. The following deposit thickens in the  
1139 ~~plowing-ploughing~~ furrows and depressions, and is composed [by-of](#) massive fine-ash beds,  
1140 vesiculated and cohesive, and is interpreted as a lahar deposit (lithofacies mM) (e in Fig. C2). This



1141 deposit (e in Fig. C3) overlies the foundations of Palazzo Orsini (blocks in Fig. C3), now seat of the  
1142 Court of Nola and built in the second half of the XV century (Fig. C3). The top is always eroded by  
1143 the modern anthropogenic activity, and locally by deposits of recent eruptions of Vesuvius (e.g., 1822,  
1144 1906).

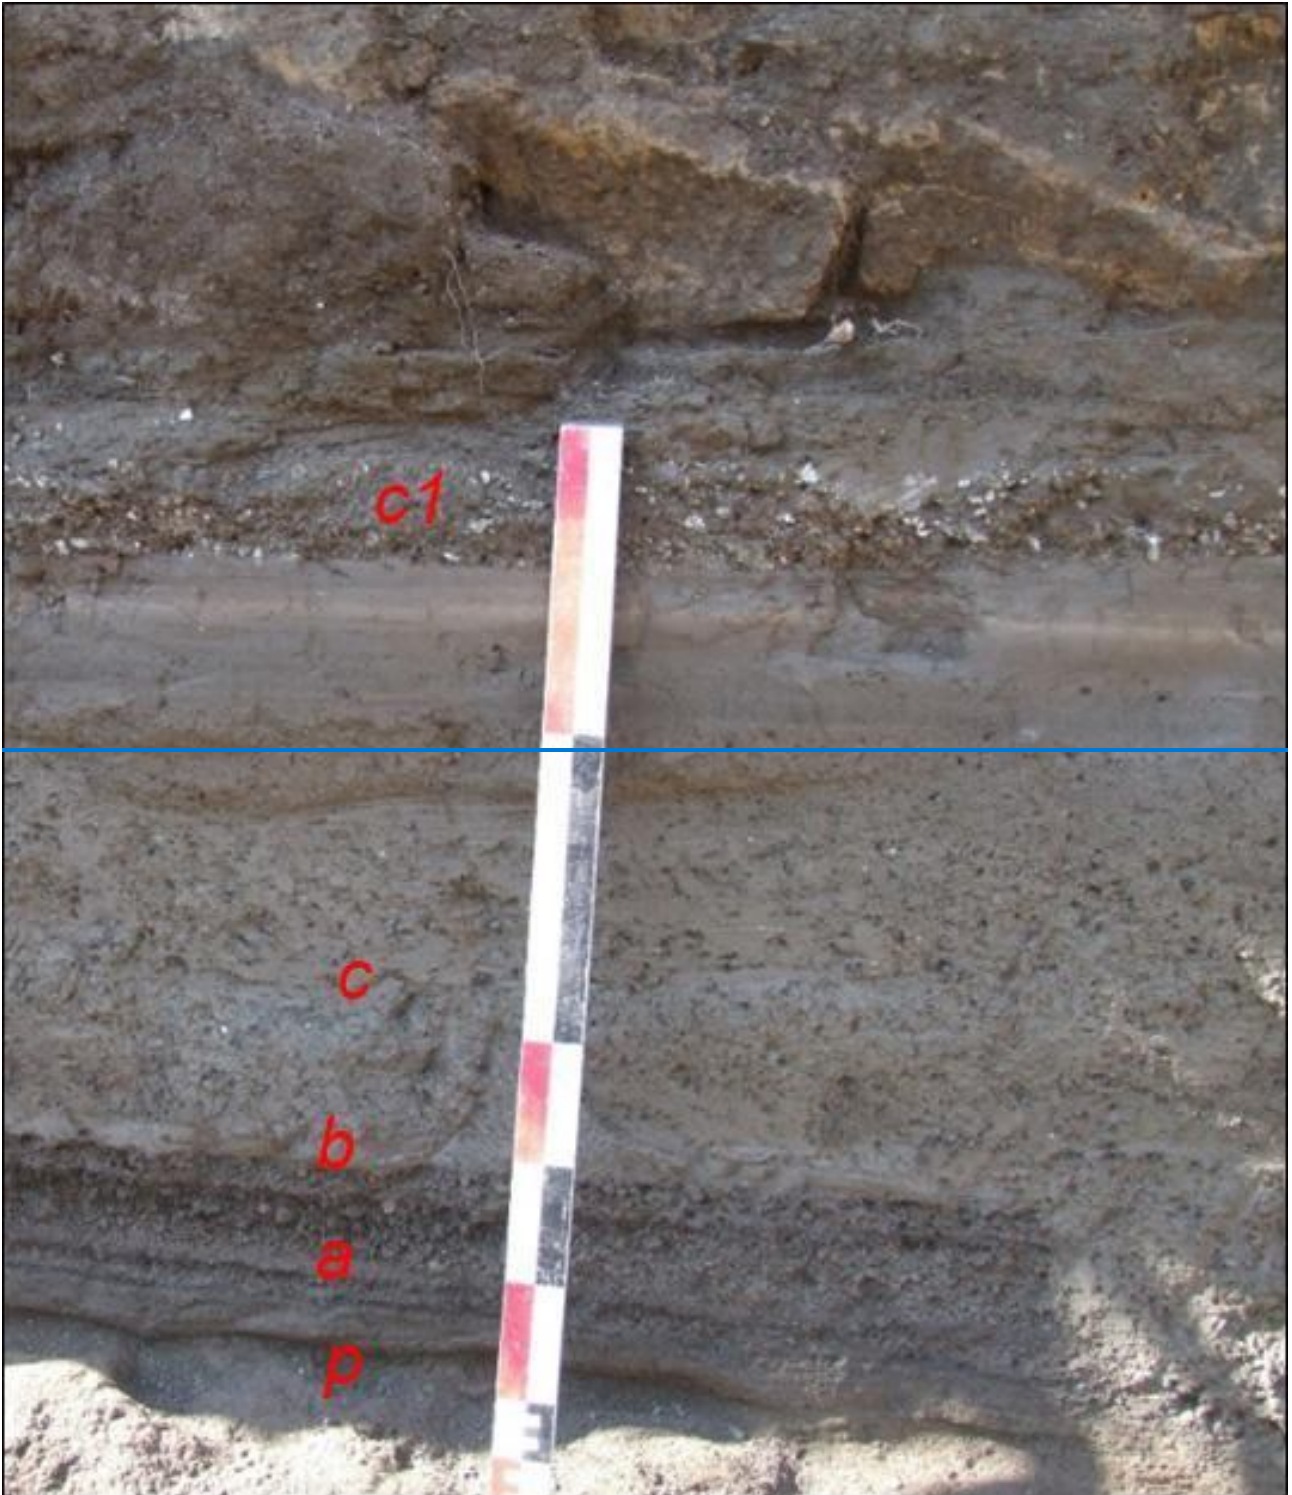

1145

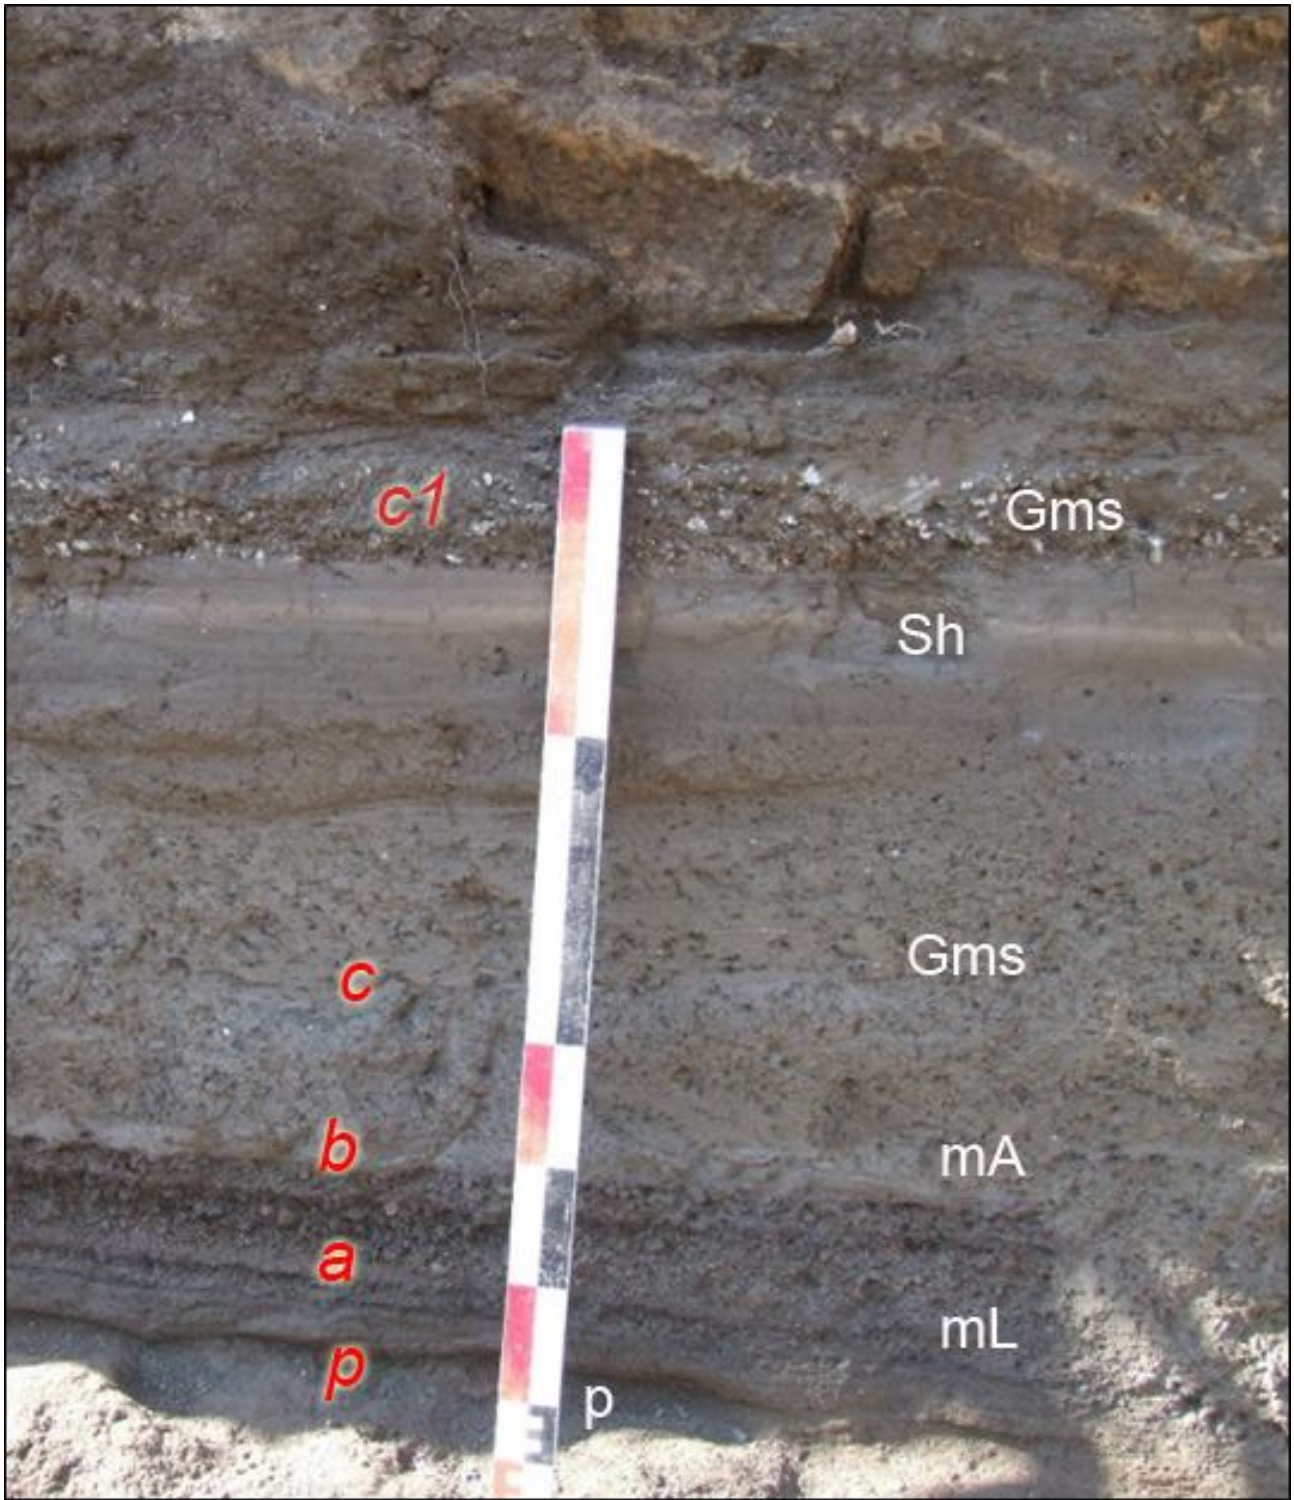

1146

1147

1148

1149

1150

1151

Fig. C1. Nola (10-15 km from Apennine source valleys), Pollena fallout deposits overlain by at least five lahar units. In particular: p = paleosol; a = alternation of coarse and fine fallout sequence of the Pollena eruption; b = final ash fallout of the eruption; c = sequence of syn-eruptive lahars; c1 = post-eruptive lahar containing white pumice fragments of the Pomici di Avellino eruption. For the description of lithofacies see Tab. 2.



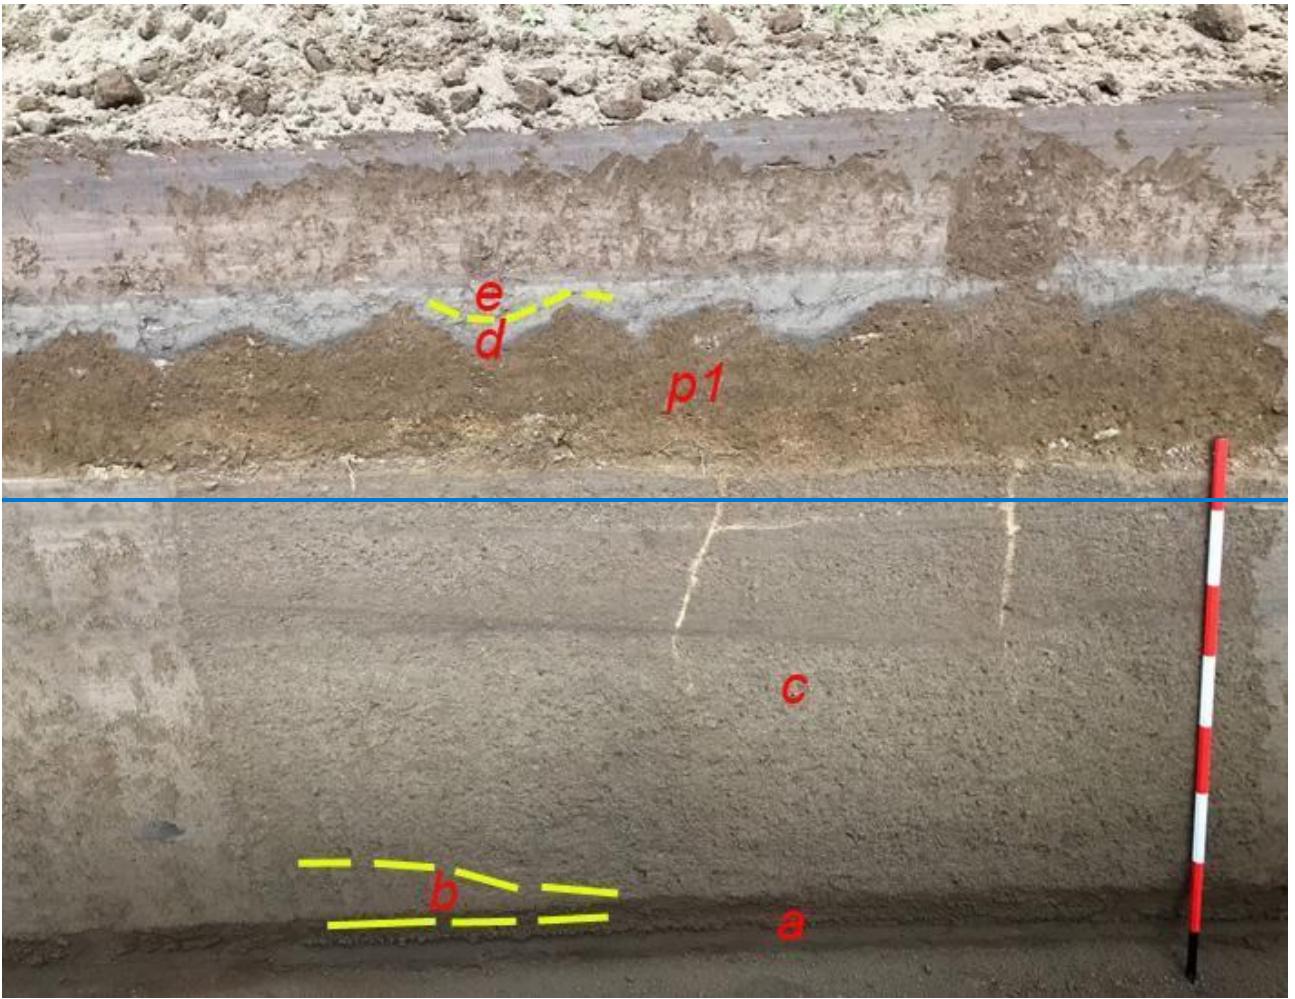

1152

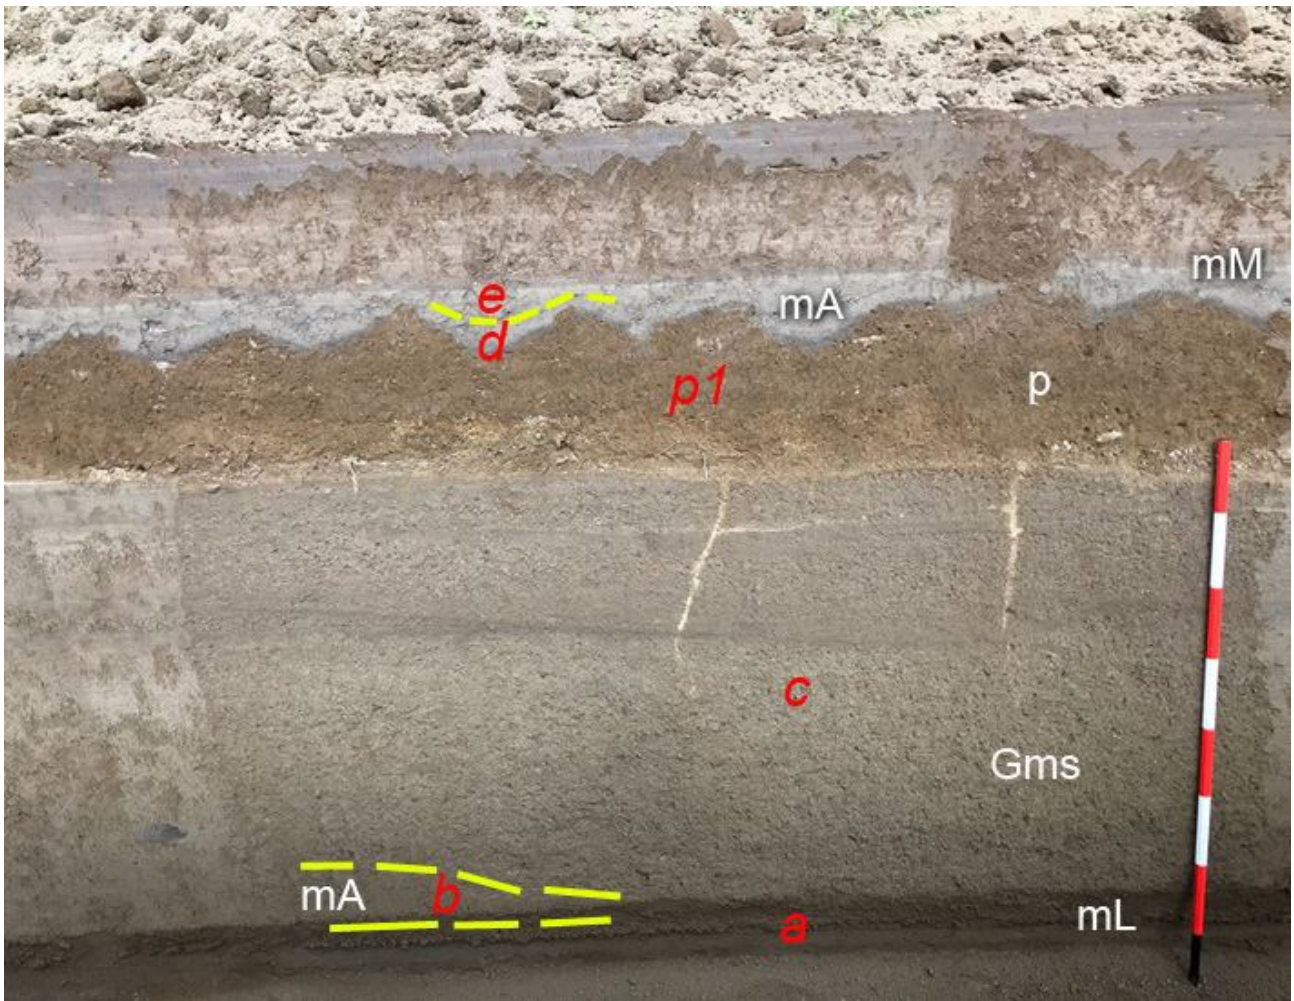

1153

1154 Fig. C2. Nola, Pollena lahar deposits overlain by a cultivated paleosol, and by the 1631 ash fallout and lahars. In  
 1155 particular: a = alternation of coarse and fine fallout sequence of the Pollena eruption; b = final ash fallout of the eruption,  
 1156 partially eroded; c = sequence of three lahar units; p1 = ploughed paleosol; d = 1631 ash fallout deposit mantling the  
 1157 undulated paleosol; e = lahar deposit composed of a massive ash layer. For the description of lithofacies see Tab. 2.

1158



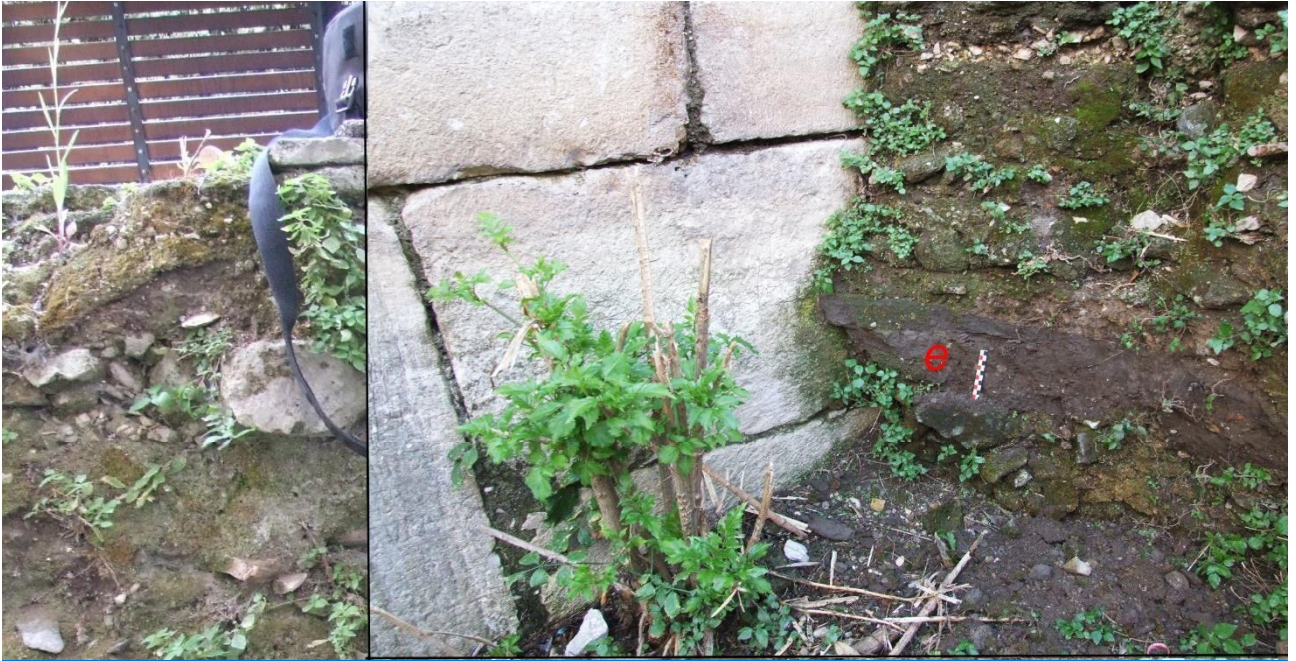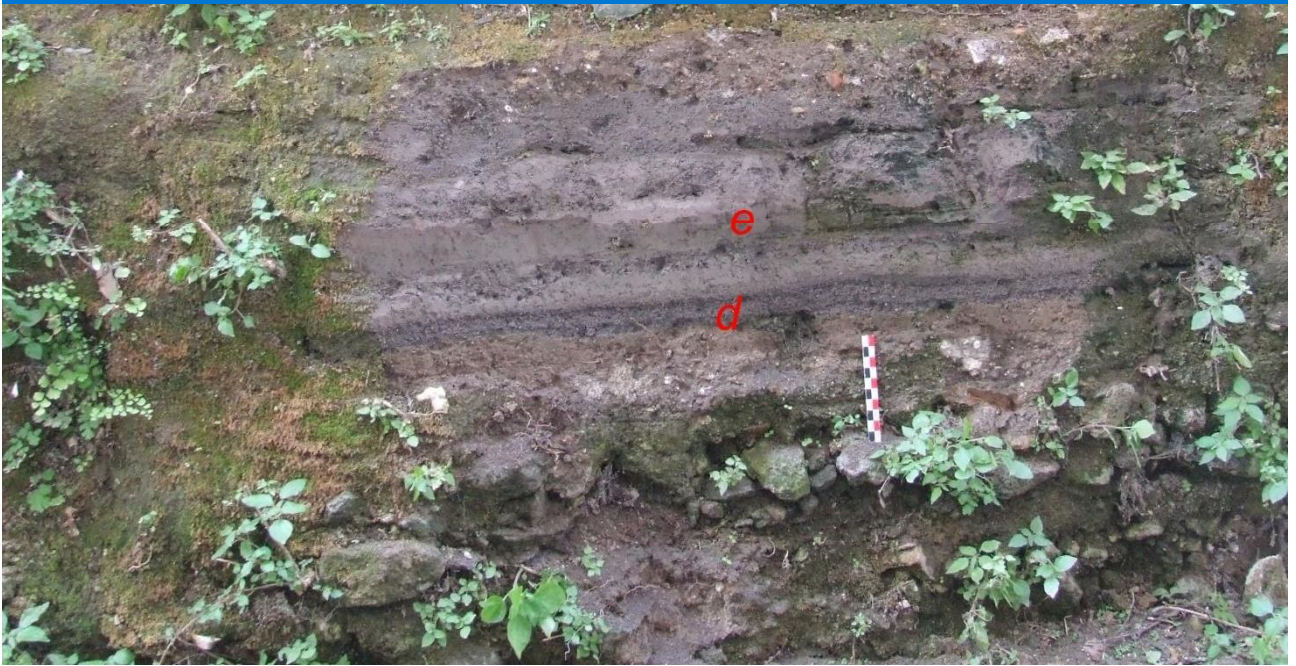



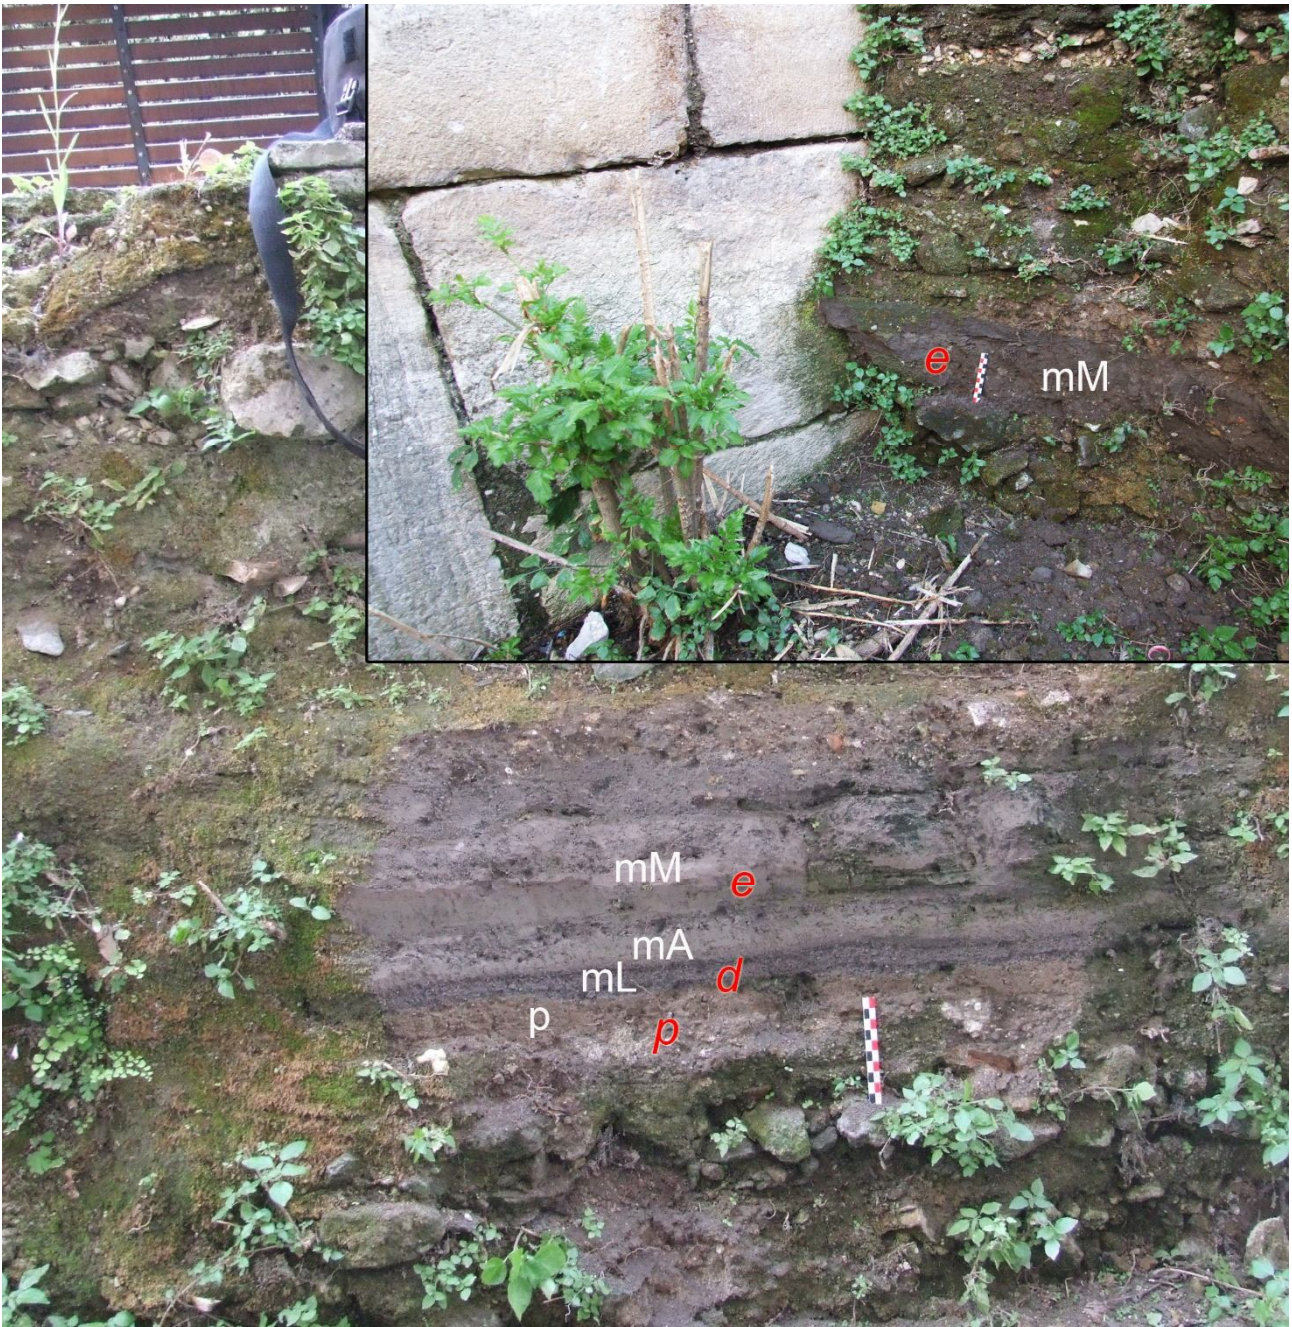

1160

1161 Fig. C3. Palazzo Orsini, Nola (1631 fallout and lahars). [In particular: d = 1631 ash fallout deposit overlying the](#)  
 1162 [foundations of the building \(in the inset\); e = syn-eruptive lahar deposit. For the description of lithofacies see Tab. 2.](#)

1163

1164 In Nola and in the nearby Cimitile [\(about 10-15 km from Apennine source valleys\)](#), the effects on the  
 1165 territory of the lahar emplacement related to the Pollena eruption are testified by numerous  
 1166 archaeological remains. The Nola and Cimitile areas are covered by thick sequences of fallout and  
 1167 lahar deposits. In fact, the previous ground level was at least 2-3 m below the present one. This effect



1168 is well visible in the Amphitheater Laterizio, which was completely filled by the primary and  
1169 secondary deposits, and the same in Cimitile, where in the archaeological site of the Early Christian  
1170 basilicas the present ground level is about two meters higher than the one before the eruption. It is  
1171 worth noting that in Cimitile the flows were able to carry limestone blocks of 50 cm in diameter,  
1172 likely along the main flow direction of the lahars (Fig. C4).

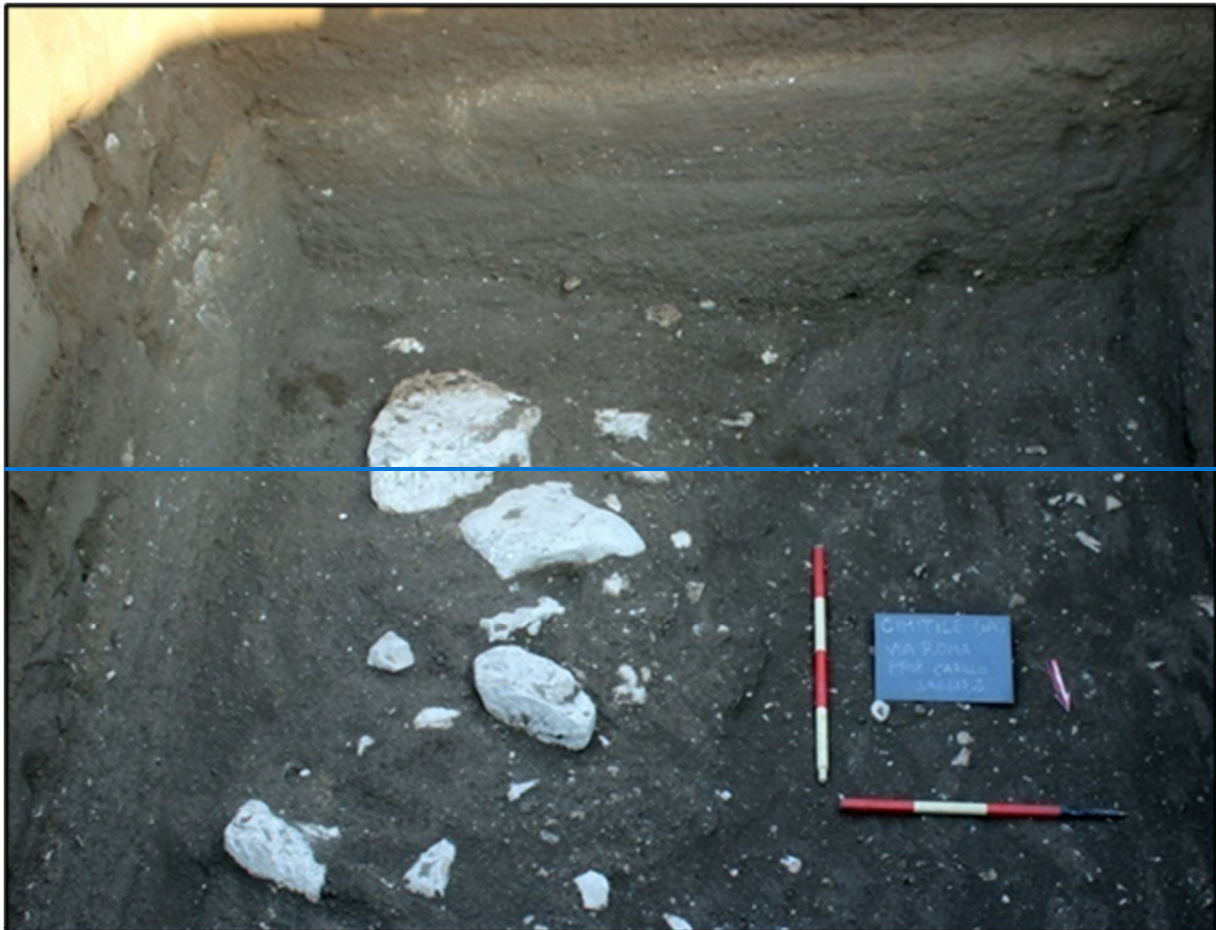

1173

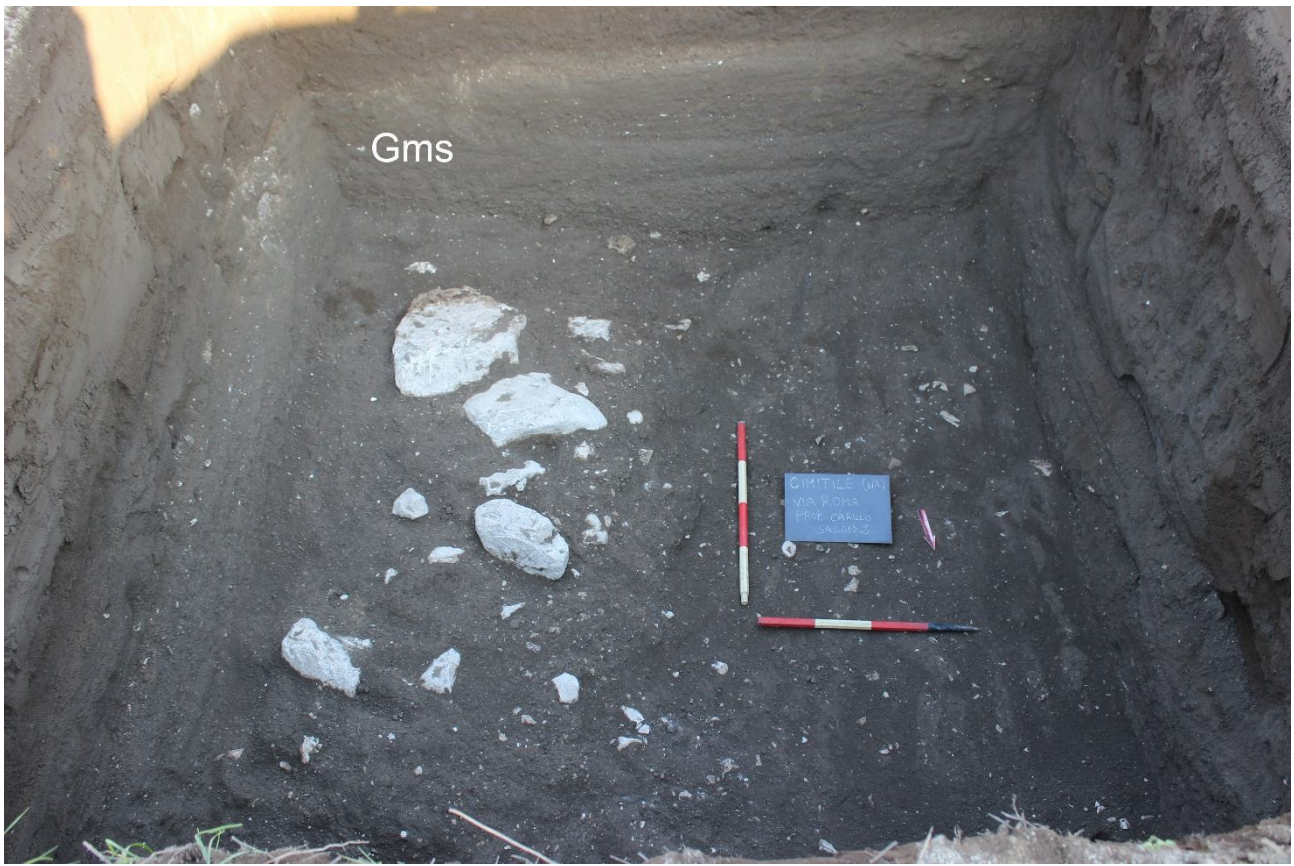

1174

1175 Fig. C4. Cimitile-S, sequence of three m-thick syn-eruptive lahar units with the evidences of transport of calcareous block  
 1176 (up to 50 cm). The largest are in the lower unit. The base of the lahar sequence and the underlying fallout deposit of the  
 1177 Pollena eruption are not visible in the photo. For the description of lithofacies see Tab. 2.

1178

1179 *Area 2 – Acerra-Afragola*

1180 The Acerra and Afragola territories (about 12 km from Somma-Vesuvius) are located north and north-  
 1181 west of Vesuvius, and are almost flat areas crossed by the Clanis river. Both the coarse fallout deposits  
 1182 of the Pollena and 1631 eruptions are absent in this area. Here, only a thin, centimetric ash bed  
 1183 overlies the Late Roman paleosol. This fine ash bed, which we correlate with the final  
 1184 phreatomagmatic phases of the Pollena eruption, is homogeneous, cohesive and mantles the ground  
 1185 without any significant lateral variation. The overlying deposit is characterized by high thickness  
 1186 variations, it is generally massive and contains vesicles from circular to flattened and coated by fine  
 1187 ash. It has a matrix-supported texture and is composed of fine to very fine, very cohesive ash, and  
 1188 contains scattered and more or less abundant pumice and lithic fragments (lithofacies mM) and



1189 remains of vegetation (Barone et al., 2023). From one to three depositional units have been  
1190 recognized, marked by unconformities, and differences in grain-size or color. The uppermost unit  
1191 always contains white pumice fragments of the Avellino eruption. Very common are drying out  
1192 structures and water escape structures, which are vertical structures (Fig. C5); [looking](#) like fractures  
1193 a few cm large, filled by finer material transported by the escaping water, formed soon after the  
1194 emplacement of the [sequence of the](#) syn-eruptive lahars (Fig. C5). The maximum thickness recorded  
1195 in this area is about 90 cm.

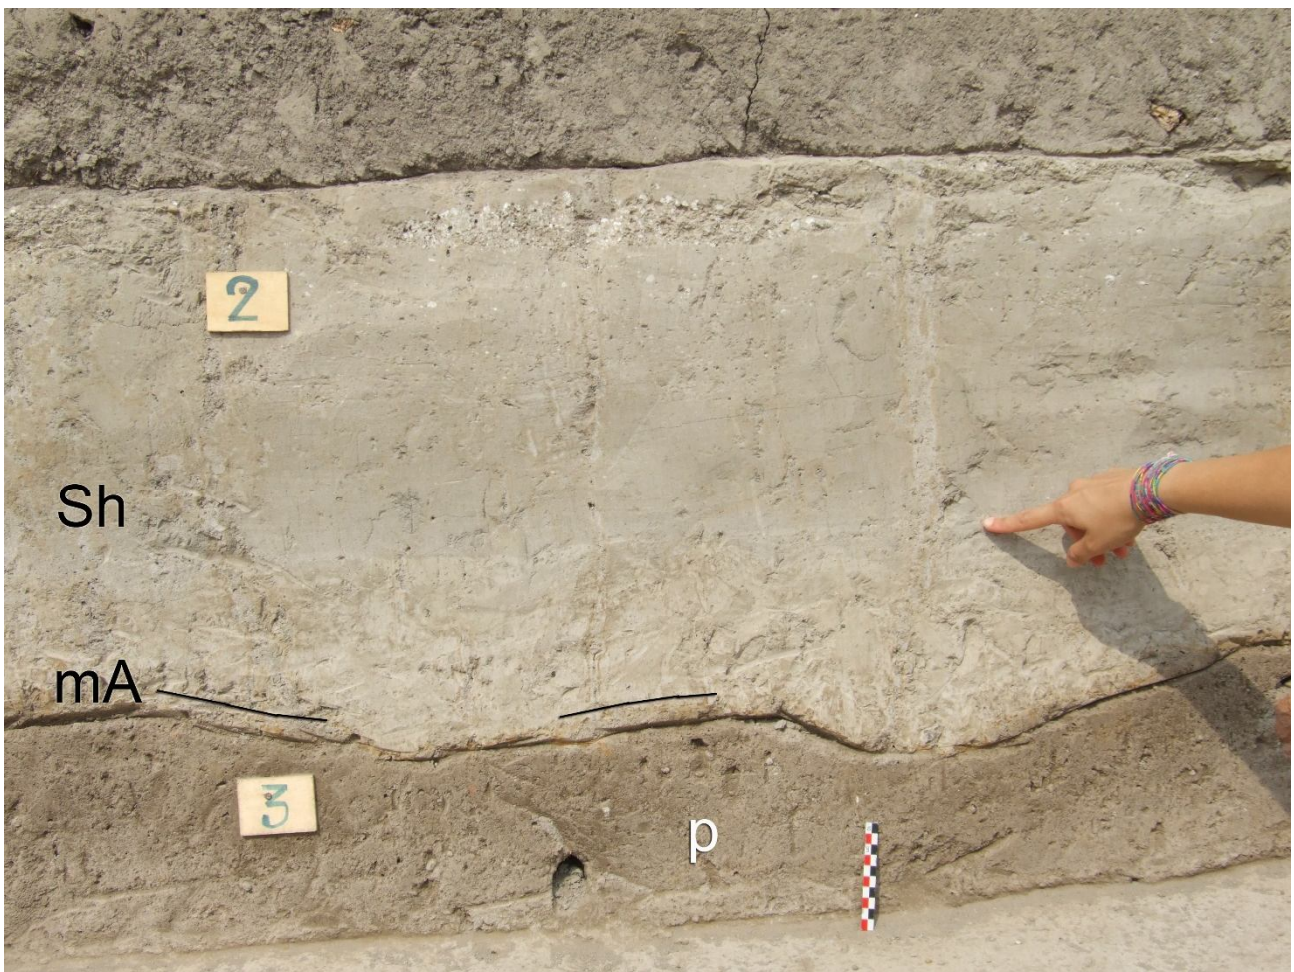

1196  
1197 Fig. C5. [Acerra \(12 km from Somma-Vesuvius\)](#), Lahar deposit (unit 2) ~~in Acerra~~ overlaying a cultivated paleosol (unit  
1198 3). The index finger indicates a water escape structure [crossing the sequence of lahars](#). [For the description of lithofacies](#)  
1199 [see Tab. 2](#).

1200



1201 The top is almost always horizontal due to the erosion related to the modern anthropogenic activity,  
1202 and only in a few exposures it is capped by a paleosol, with traces of human presence of the Medieval  
1203 times and of the deposits of the 1631 eruption as well. The base of this latter deposit is a cm-thick  
1204 fine-ash bed with an internal plane-parallel layering emplaced by fallout. It underlies a massive  
1205 deposit with high thickness variations (max 20 cm) at the outcrop scale. It is composed by of fine  
1206 ash, cohesive and vesiculated and contains scattered small pumice fragments (lithofacies mM). The  
1207 pumice fragments are vesicular, dark gray to blackish, highly porphyritic with leucite, pyroxene and  
1208 feldspar crystals. The stratigraphic position and lithology confirm their attribution to the 1631 primary  
1209 and secondary (lahars) deposits.

1210

### 1211 *Area 3 – Pomigliano-Marigliano*

1212 This area is located along the northern outer part of the Vesuvius apron (Santacroce et al., 2003). The  
1213 studied sequences start from the paleosol developed on top of the ash deposits of the AD 79  
1214 eruption. The paleosol is mature and contains pottery fragments till the II century AD. Its top is  
1215 undulated with traces of ploughing spaced about 50 cm (a in Fig. C6). Representative sequences of  
1216 the area include a basal ash layer with a thickness ranging from 1 to 4 cm (b in Fig. C7), thickening  
1217 in the depressions, cohesive and locally vesiculated. It is here interpreted as co-ignimbritic ash  
1218 emplaced by fallout during the phreatomagmatic final phases of the Pollena eruption. Upwardly, the  
1219 sequence includes several lahar units from massive to slightly stratified, composed by of fine and  
1220 very cohesive ash, and containing scattered greenish pumice fragments (lithofacies mM) (b1 in Fig.  
1221 C7). Locally this deposit, also in the case of multiple units, is cut by vertical drying cracks. The  
1222 sequence is overlain by a 25-30 cm thick mature paleosol, containing cultivation traces and majolica  
1223 fragments (c in Figs. C6 and C7).

1224 The top of this paleosol is undulated and covered by the primary deposit of the 1631 eruption (d in  
1225 Fig. C7). This latter is represented by a discontinuous medium-to-fine ash layer, slightly laminated  
1226 for contrasting grain-size, up to 5 cm thick, with a gray to violet color, and containing dark pumice

1227 fragments and loose crystals of leucite, pyroxene and biotite (Fig. C7). Its thickness variation is due  
1228 both to slight internal variations (thickening in correspondence of depressions) and erosion by the  
1229 following lahars. These latter are composed of one to three flow units (d1 in Fig. C7), with a  
1230 cumulative total thickness varying from 10 to 45 cm. They are composed of massive fine and very  
1231 cohesive ash, and contain rare scattered dark pumice fragments similar to those of the 1631 eruption  
1232 (lithofacies mM). These sequences are overlain by recent, cultivated soil. Locally, thin ash beds of  
1233 the recent Vesuvius activity (like 1822, 1906) overlie the 1631 deposits.  
1234

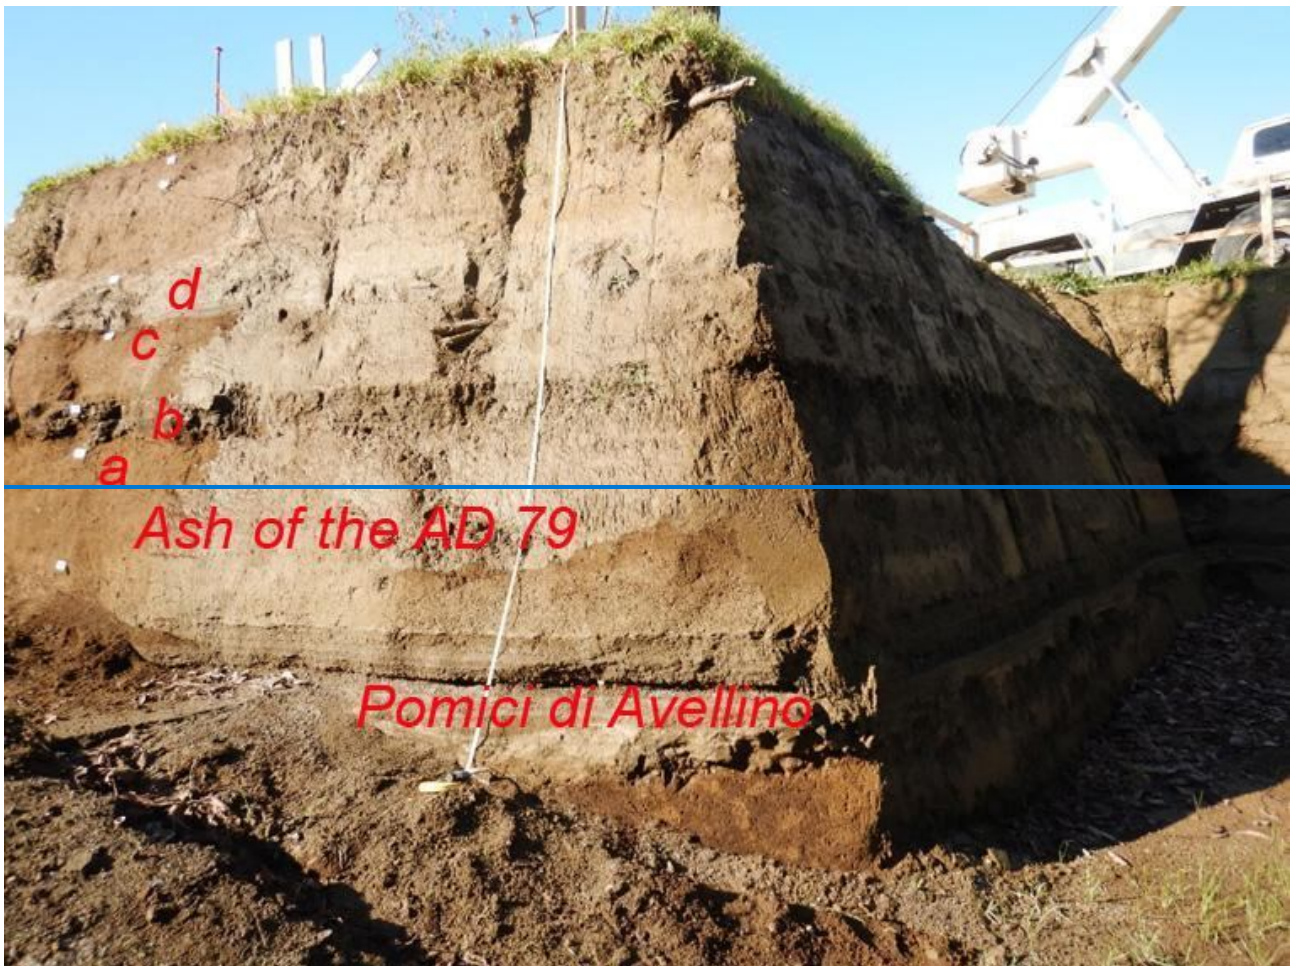

1235



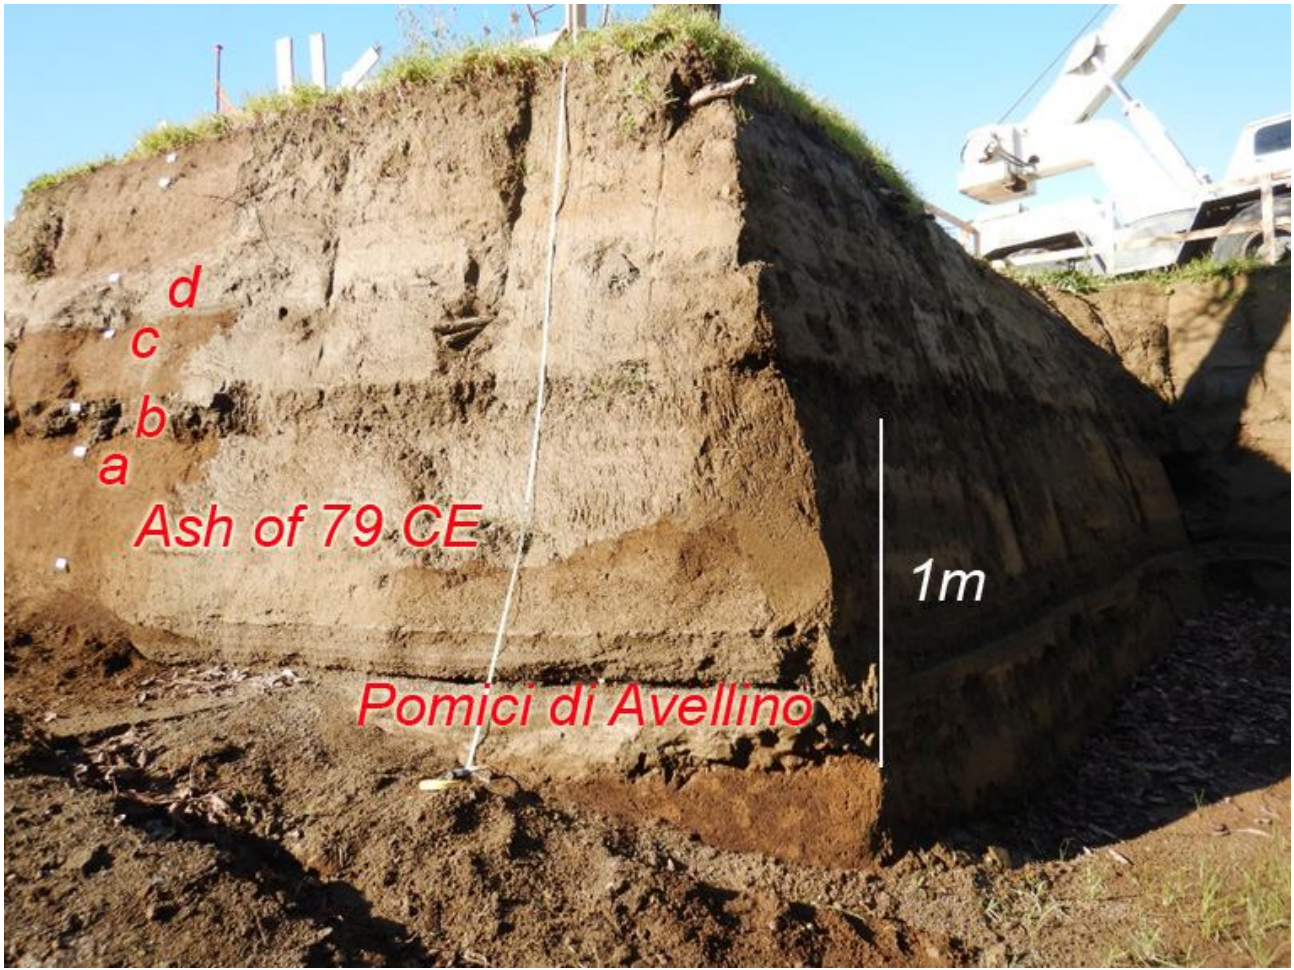

1236

1237

1238

1239

1240

1241

1242

Fig. C6. Pomigliano locality. S. sequence of deposits including bottom to top: Bronze Age paleosol, Pomici di Avellino (unit EU 5 of Di Vito et al., 2009), paleosol developed on top of Pomici di Avellino and buried by the Pollena eruption deposits. In the central part, fine ash deposits of the 79 CE eruption are visible. The top of the paleosol is undulated and ploughed. In particular: a = paleosol of Roman Age; a,b) = primary and secondary deposits of the Pollena eruption; c) = paleosol between Pollena and 1631 deposits; d) = 1631 primary and secondary deposits. Further details in Fig. C7.

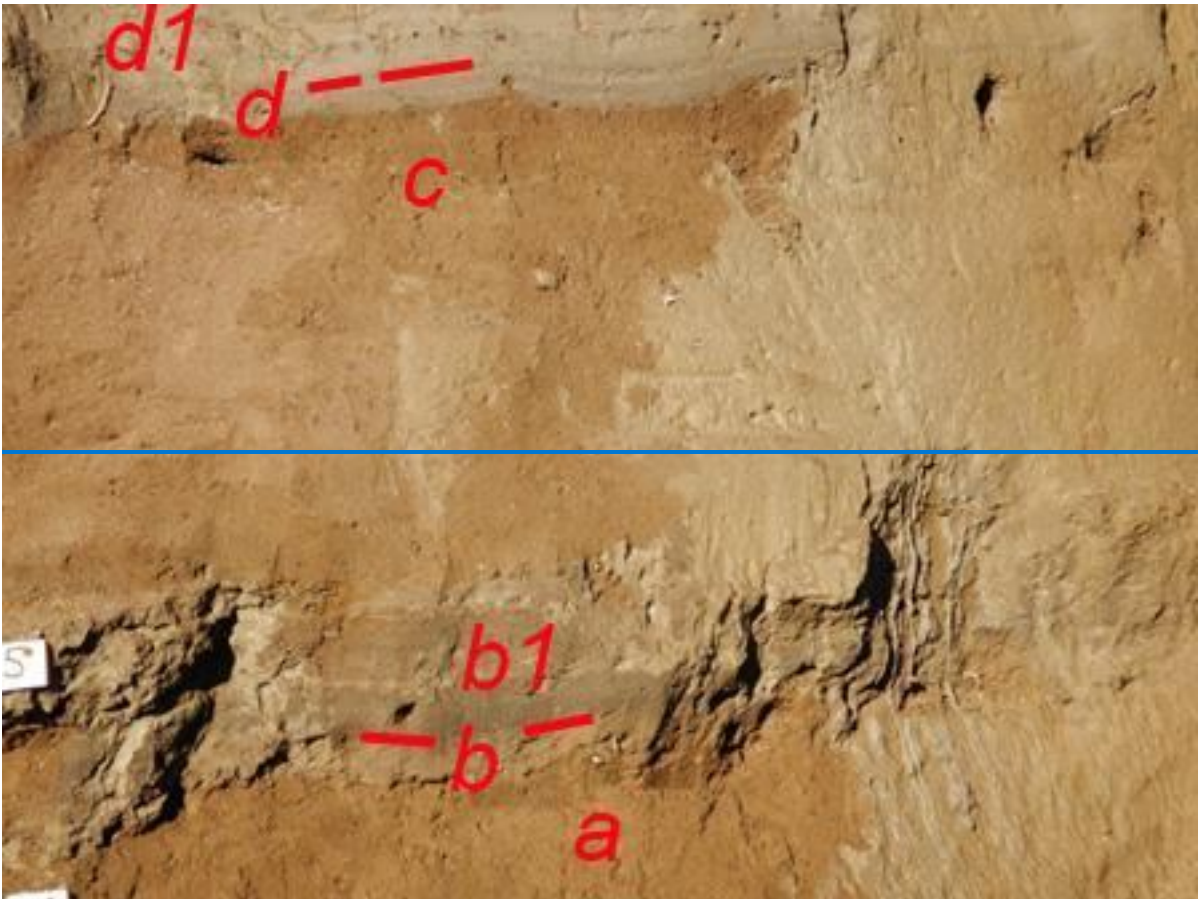

1243

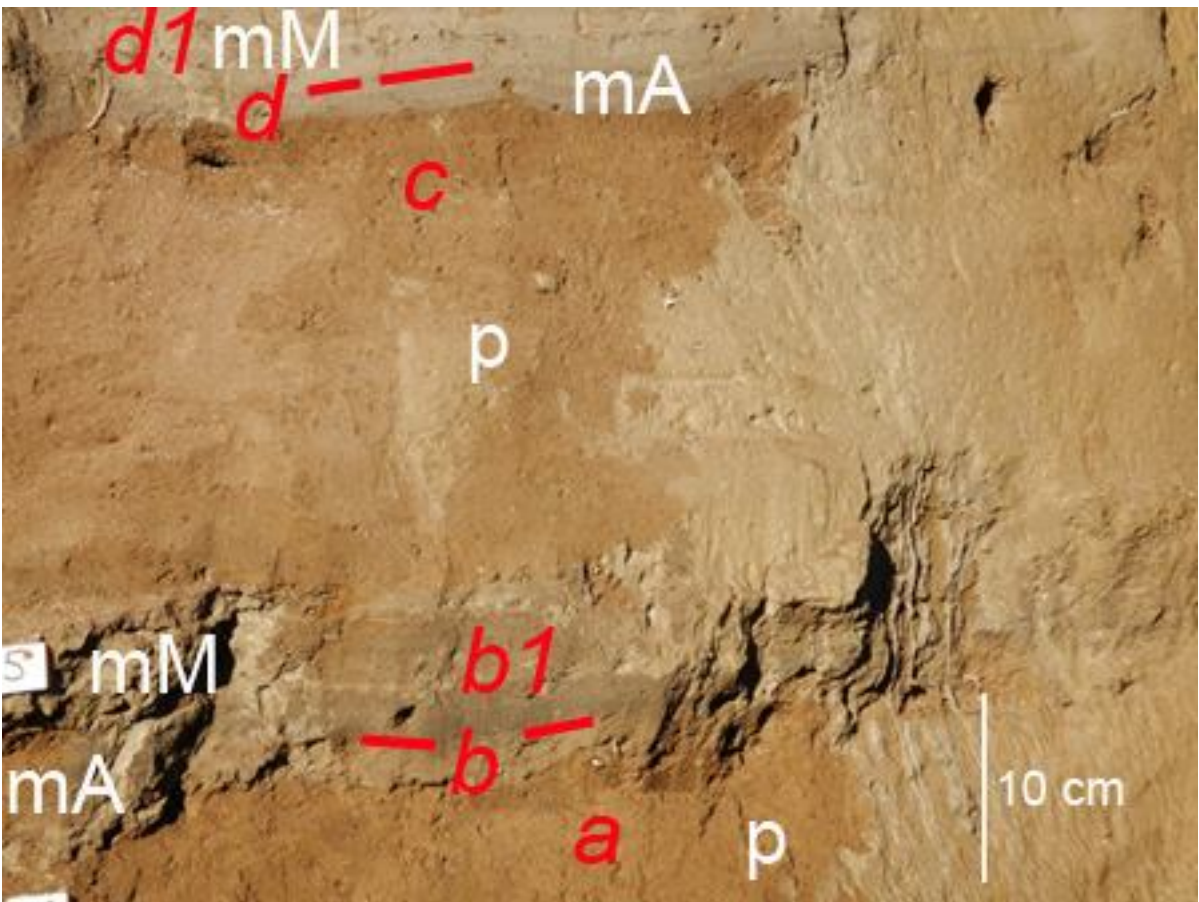

1244



1245 Fig. C7. [Pomigliano](#), particular of ~~the~~ Fig. C6: a) paleosol containing potteries of the II Cent. AD; b) ash deposit  
1246 of the Pollena eruption; b1) syn-eruptive lahars of the Pollena eruption; c) paleosol between Pollena and 1631; d) primary deposits of the 1631 eruption, overlain by syn-eruptive lahars (d1). [For the description of lithofacies see Tab. 2.](#)  
1247  
1248

#### 1249 *Area 4 – Avella-Baiano Valley*

1250 We have analyzed several sequences along the *Avella-Baiano Valley*, both exposed and excavated  
1251 for the present work. Here the sequences of primary deposits are often affected by deep erosion, in  
1252 fact, in some places the Pollena primary deposits are completely lacking and only the syn-eruptive  
1253 lahar deposits are present on top of the late Roman paleosol. Where preserved, the paleosol has often  
1254 an undulated surface due to cultivation (ploughing and hoeing). The Pollena eruption sequence  
1255 consists of an alternation of coarse pumice and fine ash layers emplaced by fallout (a in Fig. C8). It  
1256 is up to 50 cm thick and ends with a cohesive yellowish ash layer (b in Fig. C8), overlain by the lahar  
1257 deposits, generally composed by-of 2-3 flow units (c in Fig. C8). The total thickness of the lahars is  
1258 largely variable with maxima at the base of the slopes where it can reach 2-3 m. In some excavations  
1259 we did not reach the base of the deposit, deeper than 3.5 m. In Fig. C8, it is possible to observe a  
1260 complete sequence of the Pollena deposits ~~of Pollena~~ overlying a late Roman paleosol. The sequence  
1261 includes the fallout layers and thick lahar deposits. These latter are always massive, matrix-supported,  
1262 and contain abundant scattered pumice and lithic fragments (lithofacies Gms). In some cases, the  
1263 lower part contains several limestone fragments up to 10 cm in diameter. The described deposit has  
1264 been also found in the Roman Amphitheatre of Avella, where it has a variable thickness (order of  
1265 decimetric). Here, it has been almost all excavated and only remnants are presently exposed.

1266 Generally, the upper part of the sequences is composed by-of an alternation of plane-parallel to cross-  
1267 layered sands and gravels, with abundant rounded limestone fragments, emplaced by several alluvial  
1268 episodes (post-eruptive) (lithofacies Sh-Ss). In these post-eruptive deposits, it is not uncommon to  
1269 find terracotta fragments from the Imperial Roman age.

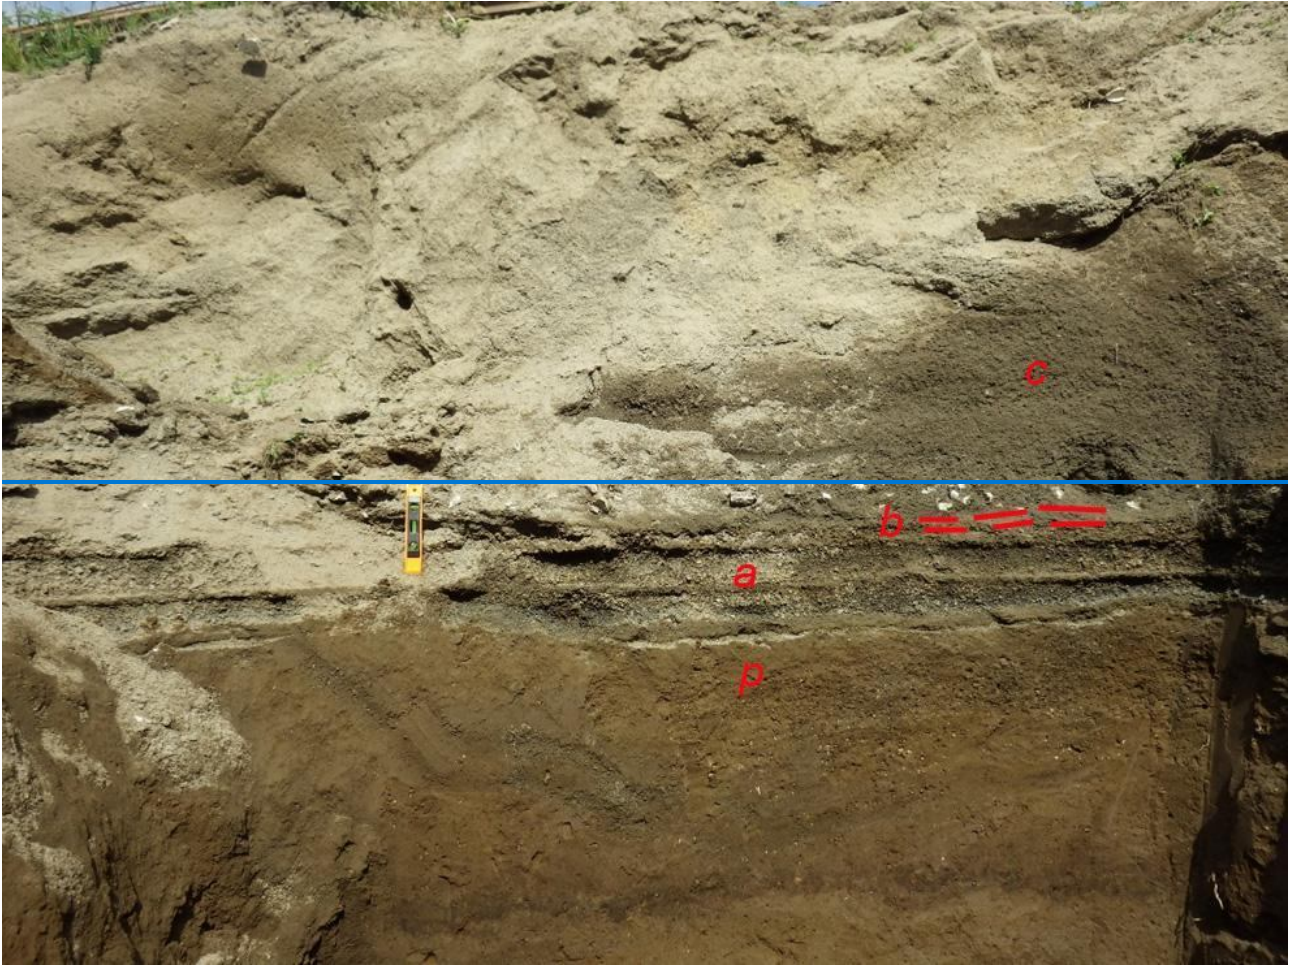

1270



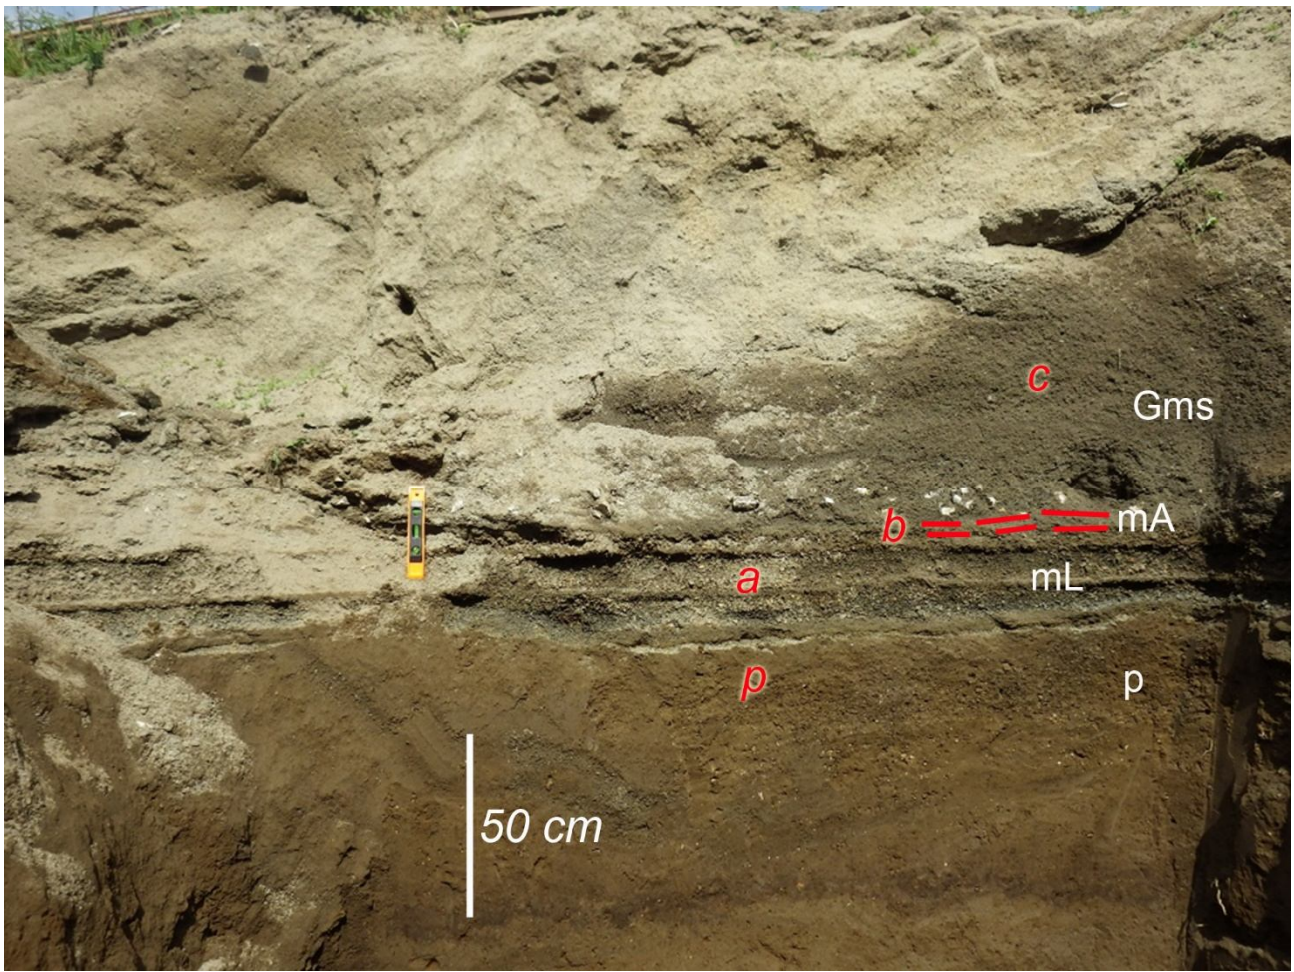

1271

1272 Fig. C8. Avella-Baiano Valley ~~Avella valley~~. ~~T~~ the Pollena primary deposit (a,b) lies on a ploughed soil (p), and ~~it~~ is  
 1273 covered by at least three flow units of lahars (c). [For the description of lithofacies see Tab. 2.](#)

1274

1275 The Pollena primary and secondary sequences are overlain by a mature paleosoil with frequent  
 1276 evidence of cultivation (ploughing, p in Fig. C9) and locally by the 1631 eruption deposits. The  
 1277 primary deposit related to the 1631 eruption is not always present. It is up to 2 cm (a in Fig. C9) thick  
 1278 ash layer, gray-violet in color deposited by fallout deposit and overlaying a ploughed paleosoil (p in  
 1279 Fig. C9). It is overlain by lahar deposits (b in Fig. C9) composed ~~by of~~ several units and characterized  
 1280 by contrasting grain-sizes. The deposits are composed of medium ash, are massive and matrix-  
 1281 supported, and contain abundant scattered mm- to cm-sized pumice fragments (all with the same  
 1282 lithology of the primary deposits) and sometimes vegetal remain traces (lithofacies Gms).

1283

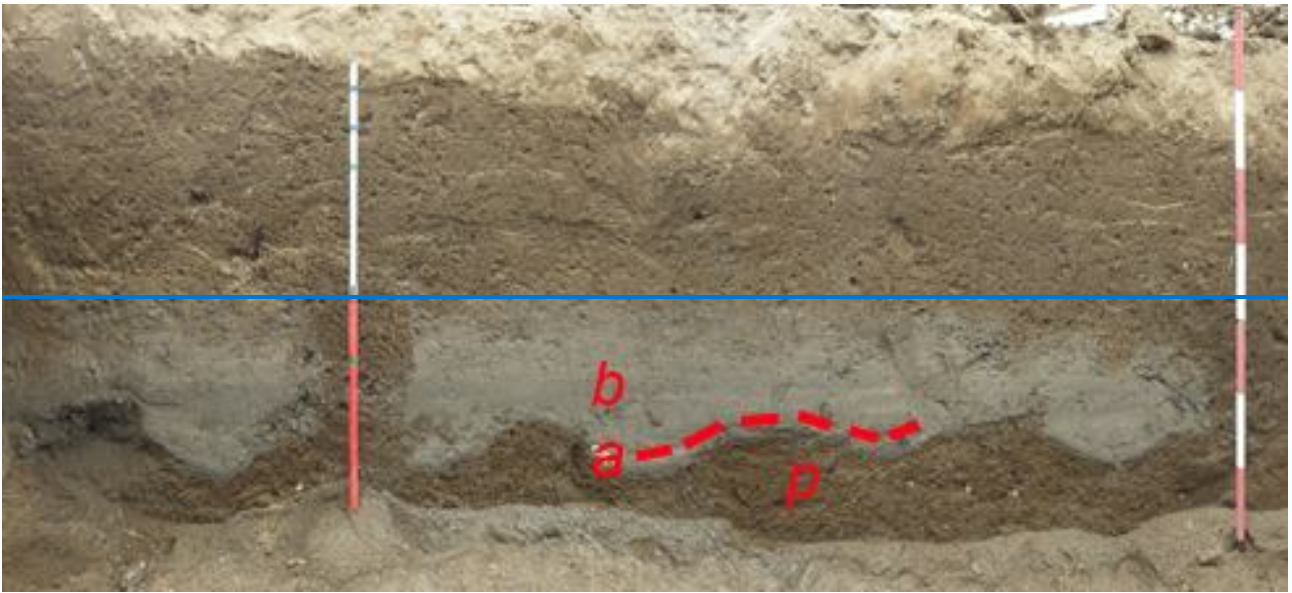

1284

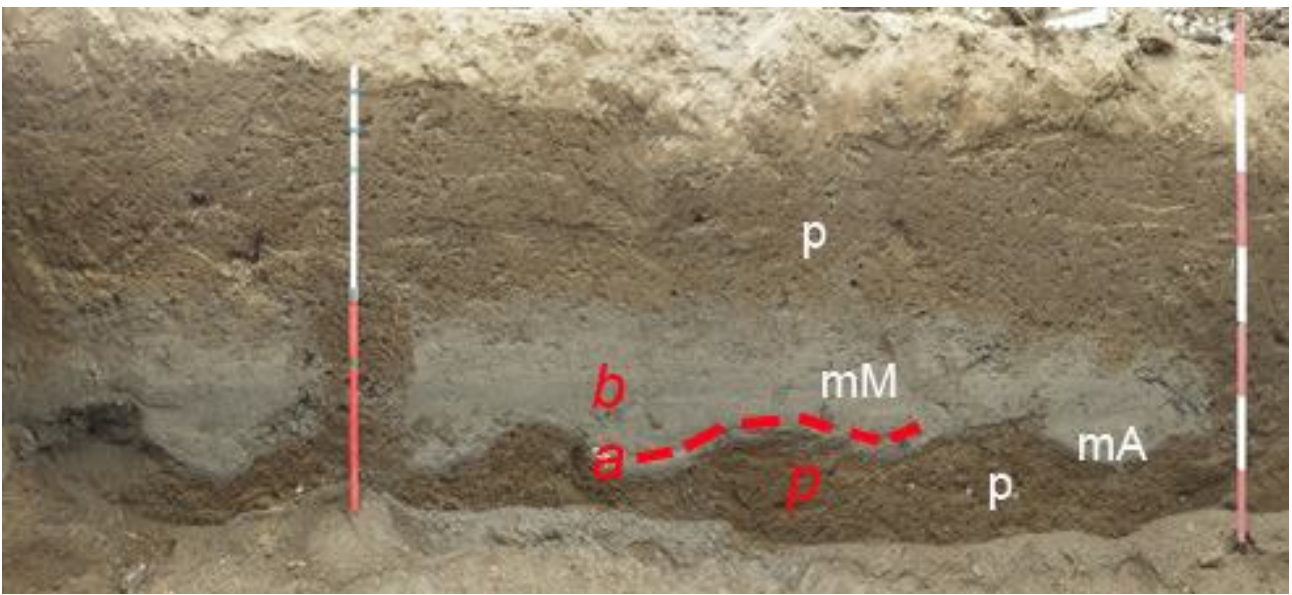

1285 Fig. C9. Avella-Baiano Valley *Avella valley*; particular of the 1631 primary (a) and secondary deposits (b, syn-eruptive  
 1286 lahars) in a trench at Cicciano locality. [For the description of lithofacies see Tab. 2.](#)

1287

1288 *Area 5 – Lauro Valley *Vallo di Lauro**

1289 Lauro Valley *Vallo di Lauro* has characteristics similar to the Avella-Baiano Valley *Avella valley*, but  
 1290 the primary deposits of Pollena and 1631 eruptions are thicker (Figs. 5 and 6) and coarser. In this  
 1291 valley, also the sequences are locally deeply eroded. In fact, the deposits of the Pollena eruption  
 1292 (normally 50-70 cm thick) (Fig. C10) are sometimes missing. They overlie a mature paleosol with  
 1293 abundant traces of cultivation. Overall, the characteristics of the deposits are very similar to the ones



1294 of the Nola area [\(10-15 km from Apennine source valleys\)](#). The overlying lahar deposits are always  
1295 massive, matrix-supported, and composed of fine and very cohesive ash with abundant scattered  
1296 pumices and lithic fragments (similar in lithology to those of the primary deposits) (lithofacies Gms).  
1297 These deposits have a high variable thickness, with a measured maximum ~~up to~~ [up to](#) 2 m, but sometimes  
1298 reduced by erosion. In some trenches the base of the sequences was deeper than the investigated depth  
1299 (>3.5 m).

1300

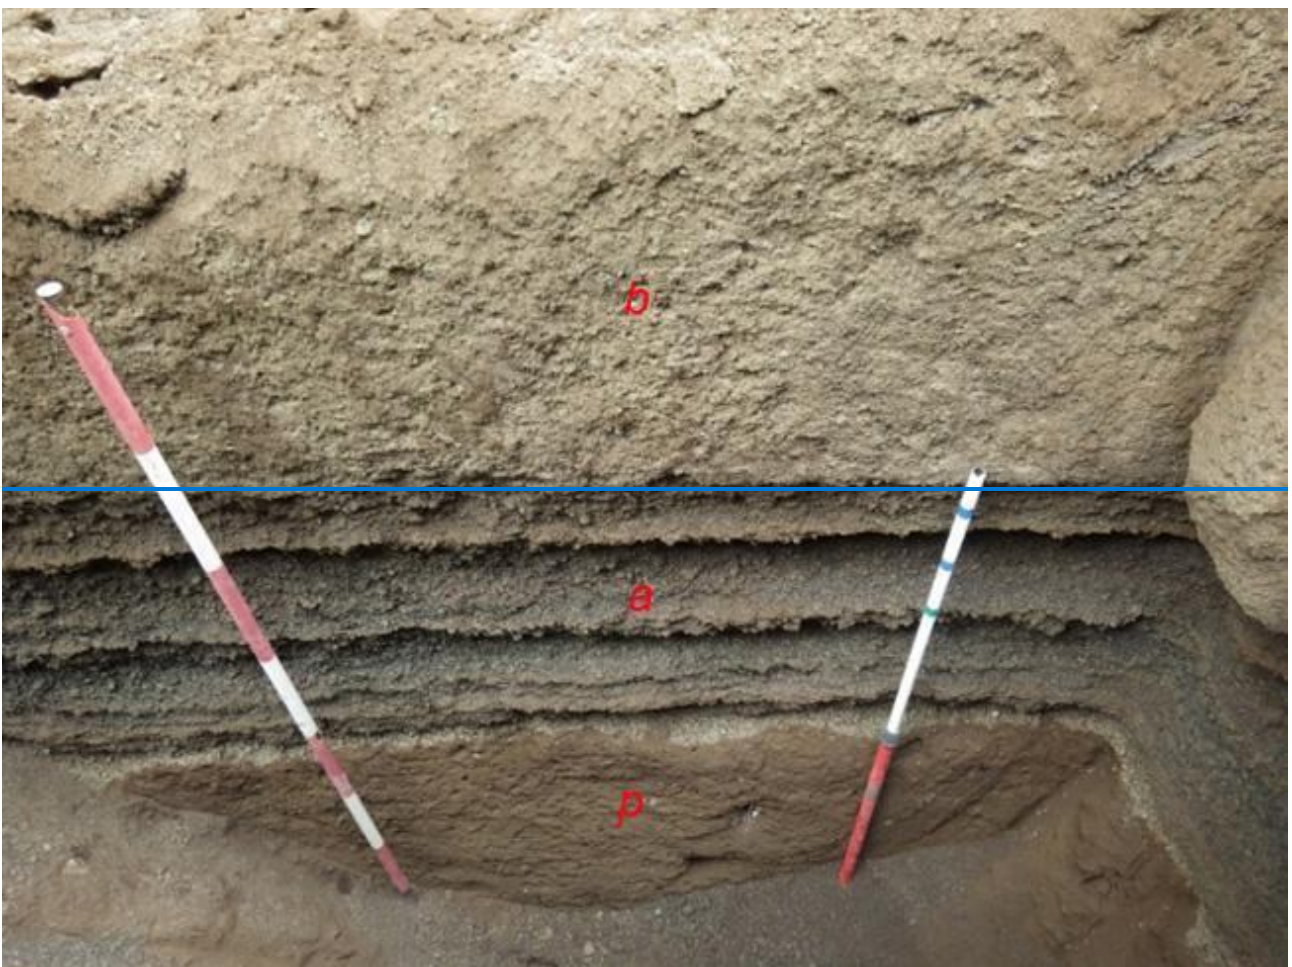

1301

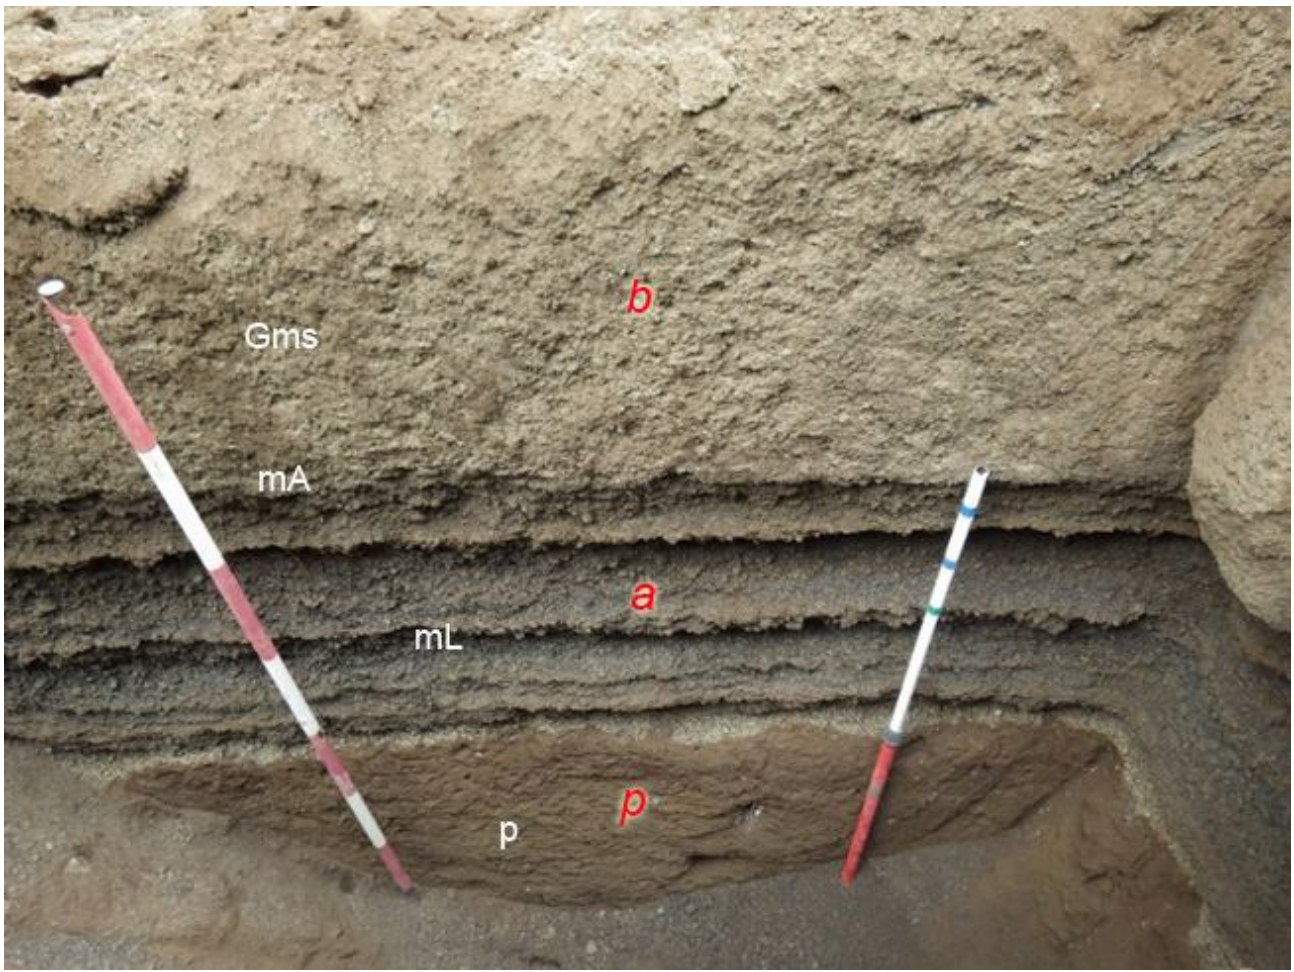

1302

1303 Fig. C10. Lauro Valley, Pago del ~~Lauro Valley~~ ~~Vallo~~ ~~Vallo di Lauro~~, in particular: a = Sequence of the Pollena fallout  
 1304 deposits (a) overlain by syn-eruptive lahars (b); p = At the base the late Roman paleosol at the base (p). For the  
 1305 [description of lithofacies see Tab. 2.](#)

1306

1307 It is possible to evaluate the effects of the lahars on building in the Roman Villa di Lauro, at Taurano,  
 1308 where a 70 cm thick fallout is overlain, without paleosol, by syn-eruptive lahars which engulfed and  
 1309 transported pieces of walls, bricks and potteries. The lahar deposits are matrix supported and  
 1310 composed ~~by of~~ fine to coarse ash and contain abundant pumice lapilli (all similar to the Pollena  
 1311 fallout deposits). They are massive, cohesive and have a thickness up to about 1 m, thickening in  
 1312 depressions and near barriers (Fig. C11).

1313 The sequence related to the eruption of 1631 is not always present, but it is possible to find its primary  
 1314 deposit, composed ~~by of~~ a basal layer of stratified fine and medium thin ash beds, and minor dark



1315 pumice and lithic fragments overlain by a thin, very fine and cohesive accretionary lapilli-rich ash  
1316 bed. The maximum measured thickness is 30 cm. The overlying lahar deposits are massive and  
1317 matrix-supported, composed of fine to coarse ash and contain abundant pumice fragments of the  
1318 primary deposit.

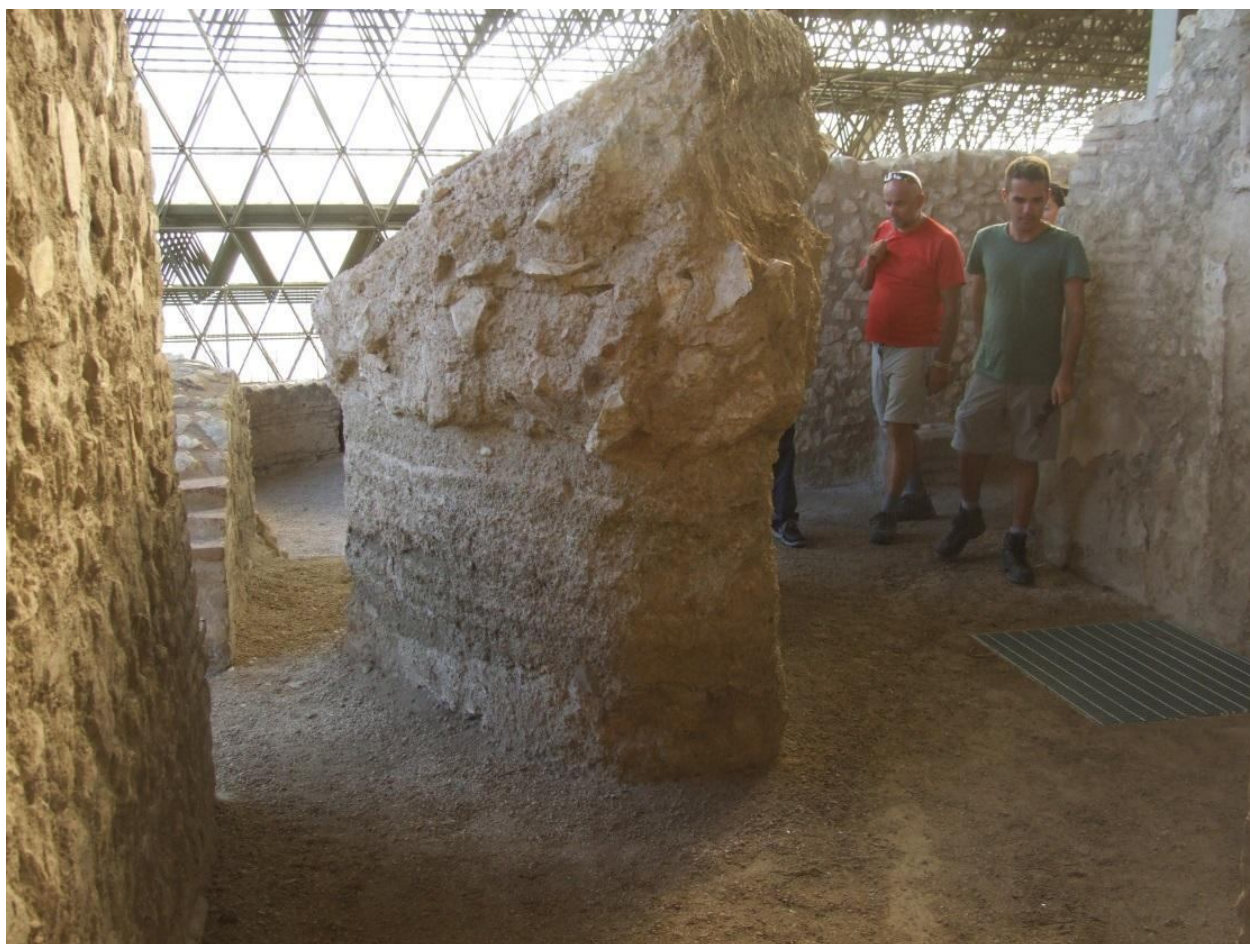

1319

1320 Fig. C11. Taurano (Villa Lauro), baulk showing a thick sequence of [the Pollena syn-eruptive](#) lahar units filling the Roman  
1321 Villa. Some units engulf and transport pieces of walls and large blocks. [The fallout sequence is not exposed in the Villa,](#)  
1322 [likely due to the presence of a roof. The deposit below the damaged walls is composed of multiple lahar units represented](#)  
1323 [by the Gms lithofacies \(see Tab. 2\).](#)

1324

### 1325 **Author contribution**

1326 MDV: conceptualization, investigation, methodology, writing - original draft preparation, writing -  
1327 review & editing, funding acquisition; IR: data curation, investigation, writing - original draft  
1328 preparation; SdV: investigation, writing - original draft preparation, writing - review & editing; DMD:

1329 investigation, methodology, data curation, writing - original draft preparation, writing - review &  
1330 editing; MB: data curation, methodology, writing - original draft preparation; MdMV: writing -  
1331 review & editing; MR: conceptualization, writing - review & editing; LS: writing - review & editing;  
1332 GZ: investigation, writing - review & editing; EZ: investigation, methodology, writing - original draft  
1333 preparation; AC: conceptualization, writing - review & editing, funding acquisition.

1334

### 1335 **Acknowledgements**

1336 This work benefited of the agreement between Istituto Nazionale di Geofisica e Vulcanologia and the  
1337 Italian Presidenza del Consiglio dei Ministri, Dipartimento della Protezione Civile (DPC),  
1338 Convenzione [INGV-DPC All. B2. The work was also supported by the INGV project Pianeta](#)  
1339 [Dinamico—Working Earth \(CUP 1466 D53J19000170001—“Fondo finalizzato al rilancio degli](#)  
1340 [investimenti delle 1467 amministrazioni centrali dello Stato e allo sviluppo del Paese”, legge](#)  
1341 [145/2018\)—Task V3 \(MDV\)](#). The paper does not necessarily represent DPC official opinion and  
1342 policies. [We thank very much Ulrich Kueppers, Lucia Capra, an anonymous reviewer and the editor](#)  
1343 [Andrea Di Muro for their help in improving this manuscript in the revision process.](#)

1344

### 1345 **References**

1346 Acocella V and Funicello R (2006) Transverse systems along the extensional Tyrrhenian margin of  
1347 Central Italy and their influence on volcanism. *Tectonics* 25,1-24.

1348 Arguden AT and Rodolfo KS (1990) Sedimentologic and dynamic differences between hot and cold  
1349 laharic debris flows of Mayon Volcano, Philippines. *Geological Society of America Bulletin* 102,  
1350 865-876.

1351 Bardot L (2000) Emplacement temperature determinations of proximal pyroclastic deposits on  
1352 Santorini, Greece, and their implications. *Bulletin of Volcanology* 61, 450-467.



- 1353 Bardot L, McClelland E (2000) The reliability of emplacement temperature estimates using  
1354 paleomagnetic methods: a case study from Santorini, Greece. *Geophysical Journal International* 143,  
1355 39-51.
- 1356 Bartole R (1984) Tectonic Structure of the Latian-Campanian Shelf (Tyrrhenian Sea). *Bollettino di*  
1357 *Oceanologia Teorica Applicata* 2, 197-230.
- 1358 [Baumann V, Bonadonna C, Cuomo S, Moscariello M \(2020\) Modelling of erosion processes](#)  
1359 [associated with rainfall-triggered lahars following the 2011 Cordon Caulle eruption \(Chile\). \*Journal\*](#)  
1360 [of \*Volcanology and Geothermal Research\* 390, 106727.](#)
- 1361 Bisson M, Pareschi MT, Zanchetta G, Sulpizio R, Santacroce R (2007) Volcaniclastic debris-flow  
1362 occurrences in the Campania region (Southern Italy) and their relation to Holocene–Late Pleistocene  
1363 pyroclastic fall deposits: implications for large-scale hazard mapping. *Bulletin of Volcanology* 70,  
1364 157-167.
- 1365 Bisson M, Spinetti C, Sulpizio R (2014) Volcaniclastic flow hazard zonation in the Sub-Apennine  
1366 Vesuvian area using GIS and remote sensing. *Geosphere* 10, 1419-1431.
- 1367 Bisson M, Zanchetta G, Sulpizio R, Demi F (2013) A map for volcaniclastic debris flow hazards in  
1368 Apennine areas surrounding the Vesuvius volcano (Italy). *Journal of Maps* 9, 230-238.
- 1369 Blott SJ and Pye K (2001) Gradistat: A Grain Size Distribution and Statistics Package for the Analysis  
1370 of Unconsolidated Sediments. *Earth Surface Processes and Landforms* 26, 1237-1248.
- 1371 Braccini GC (1632) Dell’Incendio Fattosi nel Vesuvio a XVI di Dicembre MDCXXXI. Secondino  
1372 Roncagliolo, 104 pp.
- 1373 Brancaccio L, Cinque A, Romano P, Roskopf C, Russo F, Santangelo N, Santo A (1991)  
1374 Geomorphology and neotectonic evolution of a sector of the Tyrrhenian flank of the Southern  
1375 Apennines (Region of Naples, Italy). *Zeitschrift für Geomorphologie Supplement Bd.* 82, 47-58.

- 1376 Breard ECP, Lube G, Cronin SJ, Valentine GA (2015) Transport and deposition processes of the  
1377 hydrothermal blast of the 6 August 2012 Te Maari eruption, Mt. Tongariro. *Bulletin of Volcanology*  
1378 77, 100.
- 1379 [Breard ECP, Lube G \(2017\) Inside pyroclastic density currents – uncovering the enigmatic flow](#)  
1380 [structure and transport behaviour in large-scale experiments. \*Earth and Planetary Science Letters\* 458,](#)  
1381 [22-36.](#)
- 1382 Brocchini D, Principe C, Castradori D, Laurenzi MA, Gorla L (2001) Quaternary evolution of the  
1383 southern sector of the Campanian Plain and early Somma-Vesuvius activity: insights from the Trecase  
1384 1 well. *Mineralogy and Petrology* 73, 67-91.
- 1385 [Capra L, Sulpizio R, Marquez-Ramirez VH, Coviello V, Doronzo DM, Arambula-Mendoza R, Cruz](#)  
1386 [S \(2018\) The anatomy of a pyroclastic density current: the 10 July 2015 event at Volcan de Colima](#)  
1387 [\(Mexico\). \*Bulletin of Volcanology\* 80, 34.](#)
- 1388 Carling PA (2013) Freshwater megaflood sedimentation: What can we learn about generic processes?  
1389 *Earth-Science Reviews* 125, 87-113.
- 1390 Carrara E, Iacobucci F, Pinna E, Rapolla A (1973) Gravity and magnetic survey of the Campanian  
1391 volcanic area, S. Italy. *Bollettino di Geofisica Teorica e Applicata* 15, 39-51.
- 1392 Cas RAF, Wright HMN, Folkes CB, Lesti C, Porreca M, Giordano G, Viramonte JG (2011) The flow  
1393 dynamics of an extremely large volume pyroclastic flow, the 2.08-Ma Cerro Galán Ignimbrite, NW  
1394 Argentina, and comparison with other flow types. *Bulletin of Volcanology* 73, 1583-1609.
- 1395 Cinque A and Robustelli G (2009) Alluvial and coastal hazards caused by long-range effects of  
1396 Plinian eruptions: The case of the Lattari Mts. After the AD 79 eruption of Vesuvius. *Geological*  
1397 *Society London Special Publications* 322, 155-171.

- 1398 [Cioni R, Santacroce R, Sbrana A \(1999\) Pyroclastic deposits as a guide for reconstructing the multi-](#)  
1399 [stage evolution of the Somma-Vesuvius Caldera. Bulletin of Volcanology 60, 207-222.](#)
- 1400 Cioni R, Gurioli L, Lanza R, Zanella, E (2004) Temperatures of A.D. 79 pyroclastic density current  
1401 deposits (Vesuvius, Italy). Journal of Geophysical Research 109, B02207.
- 1402 Costa JE (1997) Hydraulic modeling for lahar hazards at Cascades volcanoes. Environmental  
1403 Engineering Geoscience 3, 21-30.
- 1404 D'Argenio B, Pescatore TS, Scandone P (1973) Schema geologico dell'Appennino meridionale  
1405 (Campania e Lucania). In: Moderne vedute sulla geologia dell'Appennino. Convegno (Roma, 16-18  
1406 Febbraio 1972). Accademia Nazionale dei Lincei, Problemi Attuali di Scienza e Cultura, Quaderni  
1407 183, 49-72.
- 1408 [De Falco M, Forte G, Marino E, Massaro L, Santo A \(2023\) UAV and field survey observations on](#)  
1409 [the November 26th 2022 Celario flowslide, Ischia Island \(Southern Italy\). Journal of Maps 19,](#)  
1410 [2261484.](#)
- 1411 de' Michieli Vitturi M, Costa A, Di Vito MA, Sandri L, Doronzo DM ([submitted this issue](#)). Lahar  
1412 events in the last 2,000 years from Vesuvius eruptions. Part 2: Formulation and validation of a  
1413 computational model based on a shallow layer approach.
- 1414 De Simone GF, Perrotta A, Scarpati C (2011) L'eruzione del 472 d.C. ed il suo impatto su alcuni siti  
1415 alle falde del Vesuvio. Rivista Studi Pompeiani 22, 61-71.
- 1416 De Vivo B, Rolandi G, Gans PB, Calvert A, Bohrson WA, Spera FJ, Belkin HE (2001) New  
1417 constraints on the pyroclastic eruptive history of the Campanian volcanic Plain (Italy). Mineralogy  
1418 and Petrology 73, 47-65.
- 1419 Di Crescenzo G and Santo A (2005) Nuovo contributo sul ruolo svolto dai livelli pomicei nelle aree  
1420 di distacco delle frane di colata rapida dei massicci carbonatici campani. Convegno Nazionale La



1421 mitigazione del rischio da colate di fango a Sarno e negli altri Comuni colpiti dagli eventi del maggio  
1422 1998. Napoli, 2 e 3 maggio 2005 - Sarno 4 e 5 maggio 2005.

1423 Di Vito MA, Castaldo N, de Vita S, Bishop J, Vecchio G (2013) Human colonization and volcanic  
1424 activity in the eastern Campania Plain (Italy) between the Eneolithic and Late Roman periods.  
1425 Quaternary International 303, 132-141

1426 Di Vito M.A., Calcaterra D., Petrosino P., Zanchetta G., De Vita S., Marotta E., Cesarano M. , De  
1427 Simone A., Sansivero F., Rucco I. (2019). Landslides, volcanism and volcano-tectonics: the fragility  
1428 of the Neapolitan territory. Geol. F. Trips Maps, Volume 11 (1.1)/2019.  
1429 <https://doi.org/10.3301/GFT.2019.01> - pp 1-53.

1430 Di Vito MA, Sulpizio R., Zanchetta G (1998). I depositi ghiaiosi della valle dei torrenti Clanio e  
1431 Acqualonga (Campania centro-orientale): significato stratigrafico e ricostruzione paleoambientale. Il  
1432 Quaternario Italian Journal of Quaternary Sciences 11, 273-286.

1433 Di Vito MA, Talamo P, de Vita S, Rucco I, Zanchetta G, Cesarano M (2019) Dynamics and effects  
1434 of the Vesuvius Pomici di Avellino Plinian eruption and related phenomena on the Bronze Age  
1435 landscape of Campania region (Southern Italy). Quaternary International 499, 231-244.

1436 Di Vito M, Zanella E, Gurioli L, Lanza R, Sulpizio R, Bishop J, Tema E, Boenzi G, Laforgia E (2009)  
1437 The Afragola settlement near Vesuvius, Italy: The destruction and abandonment of a Bronze Age  
1438 village revealed by archeology, volcanology and rock-magnetism. Earth and Planetary Science  
1439 Letters 277, 408-421.

1440 [Doronzo DM \(2012\) Two new end members of pyroclastic density currents: Forced-convection](#)  
1441 [dominated and inertia-dominated. Journal of Volcanology and Geothermal Research 219-220, 87-91.](#)

1442 Doronzo DM, Martí J, Sulpizio R, Dellino P (2012) Aerodynamics of stratovolcanoes during  
1443 multiphase processes. Journal of Geophysical Research 117, B01207.

1444 Doronzo DM, Dellino P (2013) Hydraulics of subaqueous ash flows as deduced from their deposits:  
1445 2. Water entrainment, sedimentation, and deposition, with implications on pyroclastic density current  
1446 deposit emplacement. *Journal of Volcanology and Geothermal Research* 258, 176-186.

1447 Doronzo DM (2013) Aeromechanic analysis of pyroclastic density currents past a building. *Bulletin*  
1448 *of Volcanology* 75, 684.

1449 Duller RA, Mountney NP, Russell AJ, Cassidy NC (2008) Architectural analysis of a volcanoclastic  
1450 jökulhlaup deposit, southern Iceland: sedimentary evidence for supercritical flow. *Sedimentology* 55,  
1451 939-964.

1452 Faccenna C, Funicello R, Bruni A, Mattei M, Sagnotti L (1994) Evolution of a transfer related basin:  
1453 the Ardea basin (Latium, Central Italy). *Basin Resources* 5, 1-11.

1454 Fedi M and Rapolla A (1987) The Campanian Volcanic Area: analysis of the magnetic and  
1455 gravimetric anomalies. *Bollettino della Società Geologica Italiana* 106, 793-805.

1456 Finetti I and Morelli C (1974) Esplorazione di sismica a riflessione nei Golfi di Napoli e Pozzuoli.  
1457 *Bollettino di Geofisica Teorica e Applicata* 16, 62-63.

1458 Fiorillo F and Wilson RC (2004) Rainfall induced debris flows in pyroclastic deposits, Campania  
1459 (southern Italy). *Engineering Geology* 75, 263-289.

1460 Giordano G, Zanella E, Trolese M, Baffioni C, Vona A, Caricchi C, De Benedetti AA, Corrado S,  
1461 Romano C, Sulpizio R, Geshi N (2018) Thermal interactions of the AD79 Vesuvius pyroclastic  
1462 density currents and their deposits at Villa dei Papiri (Herculaneum archaeological site, Italy). *Earth*  
1463 *and Planetary Science Letters* 490, 180-192.

1464 Girolami L, Roche O, Druitt T, Corpetti T (2010) Velocity fields and depositional processes in  
1465 laboratory ash flows, with implications for the dynamics of dense pyroclastic flows. *Bulletin of*  
1466 *Volcanology* 72, 747-759.

- 1467 Gurioli L, Pareschi MT, Zanella E, Lanza R, Deluca E, Bisson M (2005) Interaction of pyroclastic  
1468 density currents with human settlements: Evidence from ancient Pompeii. *Geology* 33, 441-444.
- 1469 Gurioli L, Sulpizio R, Cioni R, Sbrana A, Santacroce R, Luperini W, Andronico D (2010) Pyroclastic  
1470 flow hazard assessment at Somma-Vesuvius based on the geological record. *Bulletin of Volcanology*  
1471 72, 1021-1038.
- 1472 Guzman S, Doronzo DM, Martí J, Seggiaro R (2020). Characteristics and emplacement mechanisms  
1473 of the Coranzulí ignimbrites (Central Andes). *Sedimentary Geology* 405, 105699.
- 1474 Ippolito F, Ortolani F, Russo M (1973) Struttura marginale tirrenica dell'Appennino campano:  
1475 reinterpretazioni di dati di antiche ricerche di idrocarburi. *Memorie della Società Geologica Italiana*  
1476 12, 227–250.
- 1477 Iverson RM, Denlinger RP, LaHusen RG, Logan M, (2000) Two-phase debris-flow across 3-D  
1478 terrain: Model predictions, *in* Wieczorek GF and Naeser ND, eds., *Debris-Flow Hazard Mitigation,*  
1479 *Mechanics, Prediction, and Assessment: Taipei, Taiwan, 16-18 August 2000: Rotterdam, Balkema,*  
1480 521-529.
- 1481 Jenkins SF, Phillips JC, Price R, Feloy K, Baxter PJ, Sri Hadmoko D, de Bélizal E (2015) Developing  
1482 building-damage scales for lahars: application to Merapi volcano Indonesia. *Bulletin of Volcanology*  
1483 77, 1-17.
- 1484 Lesti C, Porreca M, Giordano G, Mattei M, Cas R, Wright H, Viramonte J (2011) High temperature  
1485 emplacement of the Cerro Galán and Toconquis Group ignimbrites (Puna plateau, NW Argentina)  
1486 determined by TRM analyses. *Bulletin of Volcanology* 73, 1535-1565.
- 1487 Lowe DR, Williams SN, Leigh H, Connort CB, Gemmell JB, Stoiber RE (1986) Lahars initiated by  
1488 the 13 November 1985 eruption of Nevado del Ruiz, Colombia. *Nature* 324, 51-53.

- 1489 Lowe DR (1988) Suspended-load fallout rate as an independent variable in the analysis of current  
1490 structures. *Sedimentology* 35, 765–776.
- 1491 Lube G, Cronin S, Manville V, Procter J, Cole S, Freundt A (2012) Energy growth in laharcic mass  
1492 flows. *Geology* 40, 475-478.
- 1493 Macedonio G and Pareschi MT (1992) Numerical simulation of some lahars from Mount St. Helens.  
1494 *Journal of Volcanology and Geothermal Research* 54, 65-80.
- 1495 [Manville V, Nemeth K, Kano K \(2009\) Source to sink: A review of three decades of progress in the](#)  
1496 [understanding of volcanoclastic processes, deposits, and hazards. \*Sedimentary Geology\* 220, 136-161.](#)
- 1497 Mariani M and Prato R (1988) I bacini neogenici costieri del margine tirrenico: approccio sismico-  
1498 stratigrafico. *Memorie della Società Geologica Italiana* 41, 519-531.
- 1499 Marotta E., Berrino G., de Vita S., Di Vito M.A., Camacho A.G., 2022. Structural setting of the Ischia  
1500 resurgent caldera (Southern Tyrrhenian Sea, Italy) by integrated 3D gravity inversion and geological  
1501 models. In: Marotta, E., D’Auria, L., Zaniboni, F. and Nave, R. (eds) *Volcanic Island: from Hazard*  
1502 *Assessment to Risk Mitigation*. Geological Society, London, Special Publications, 519.
- 1503 Martí J, Doronzo DM, Pedrazzi D, Colombo F (2019) Topographical controls on small-volume  
1504 pyroclastic flows. *Sedimentology* 66, 2297-2317.
- 1505 McClelland E, Druitt TH (1989) Paleomagnetic estimates of emplacement temperatures of  
1506 pyroclastic deposits on Santorini, Greece. *Bulletin of Volcanology* 51, 16-27.
- 1507 McClelland E (1996) Theory of CRM acquired by grain growth, and its implications for TRM  
1508 discrimination and paleointensity determination in igneous rocks. *Geophysical Journal International*  
1509 126, 271-280.
- 1510 Newhall CG and Punongbayan R (Eds.) (1996) *Fire and mud: eruptions and lahars of Mount*  
1511 *Pinatubo, Philippines*. Quezon City: Philippine Institute of Volcanology and Seismology, 1126 pp.



1512 Orsi G, de Vita S, Di Vito MA (1996) The restless, resurgent Campi Flegrei Nested Caldera Italy.:  
1513 constraints on its evolution and configuration. *Journal of Volcanology and Geothermal Research* 74,  
1514 179-214.

1515 Pareschi MT, Favalli M, Giannini F, Sulpizio R, Zanchetta G, Santacroce R (2000) May 5, 1998,  
1516 Debris flows in circumvesuvian areas (Southern Italy), insights for hazard assessment. *Geology* 28,  
1517 639-642.

1518 Pareschi MT, Santacroce R, Sulpizio R, Zanchetta G (2002) The volcanoclastic mass flow hazard  
1519 related to the remobilization of fallout deposits in southern Campania, Italy. Explosive volcanism in  
1520 subduction zones, Mount Pelée, Martinique, 12-16 May 2002, abstract volume.

1521 Patacca E and Scandone P (2007) Geology of the Southern Apennines. *Bollettino della Società*  
1522 *Geologica Italiana Special Issue 7*, 75-119.

1523 Paterson, GA, Muxworthy AR, Roberts AP, MacNiocaill C (2010). Paleomagnetic determination of  
1524 emplacement temperatures of pyroclastic deposits: an under-utilized tool. *Bulletin of Volcanology*,  
1525 72, 309-330.

1526 Peccerillo A (2003) Plio-Quaternary magmatism in Italy. *Episodes* 26, 222-226.

1527 Perrotta A, Scarpati C, Luongo G, Aoyagi M (2006) Burial of Emperor Augustus' villa at Somma  
1528 Vesuviana (Italy) by post-79 AD Vesuvius eruptions and reworked (lahars and stream flow) deposits.  
1529 *Journal of Volcanology and Geothermal Research* 158, 445-466.

1530 Pierson TC (1985) Initiation and flow behavior of the 1980 Pine Creek and Muddy River lahars, Mt.  
1531 St. Helens, Washington. *Geological Society of America Bulletin* 96, 1056-1069.

1532 Piochi M, Pappalardo L, De Astis G (2004) Geo-chemical and isotopical variations within the  
1533 Campanian Comagmatic Province: implications on magma source composition, *Annals of*  
1534 *Geophysics* 47, 1485-1499.

- 1535 Pittari A, Cas RAF, Monaghan JJ, Martí J (2007) Instantaneous dynamic pressure effects on the  
1536 behaviour of lithic boulders in pyroclastic flows: the Abrigo Ignimbrite, Tenerife, Canary Island.  
1537 *Bulletin of Volcanology* 69, 265-279.
- 1538 Porreca M, Mattei M, Mac Niocaill C, Giordano G, McClelland E, Funicello R (2007) Paleomagnetic  
1539 evidence for low-temperature emplacement of the phreatomagmatic Peperino Albano ignimbrite  
1540 (Colli Albani volcano, Central Italy). *Bulletin of Volcanology* 70, 877-893.
- 1541 [Roche O \(2012\) Depositional processes and gas pore pressure in pyroclastic flows: an experimental](#)  
1542 [perspective. \*Bulletin of Volcanology\* 74, 1807-1820.](#)
- 1543 Roche O, Niño Y, Mangeney A, Brand B, Pollock N, Valentine GA (2013) Dynamic pore-pressure  
1544 variations induce substrate erosion by pyroclastic flows. *Geology* 41, 1107-1110.
- 1545 Roche O (2015) Nature and velocity of pyroclastic density currents inferred from models of  
1546 entrainment of substrate lithic clasts. *Earth and Planetary Science Letters* 418, 115-125.
- 1547 Rodolfo KS (2000) The hazard from lahars and jökulhlaups. In: *Encyclopedia of Volcanoes:*  
1548 *Academic Press, Philadelphia, 973-995.*
- 1549 Rodolfo KS and Arguden AT (1991) Rain-lahar generation and sediment-delivery systems at Mayon  
1550 Volcano, Philippines: Sedimentation in Volcanic Settings, *SEPM Special Publication* 45, 71-87.
- 1551 Rodríguez-Sedano LA, Sarocchi D, Caballero L, Borselli L, Ortiz-Rodríguez AJ, Cerca-Ruiz MF,  
1552 Moreno-Chávez G, Franco Ramos O (2022) Post-eruptive lahars related to the 1913 eruption in La  
1553 Lumbre Ravine, Volcán de Colima, Mexico: The influence of ravine morphometry on flow dynamics.  
1554 *Journal of Volcanology and Geothermal Research* 421, 107423.
- 1555 Rolandi G, Barrella AM, Borrelli A (1993) The 1631 eruption of Vesuvius. *Journal of Volcanology*  
1556 *and Geothermal Research* 58, 183-201.

- 1557 Rolandi G, Munno R, Postiglione I (2004) The A.D. 472 eruption of the Somma volcano. Journal of  
1558 Volcanology and Geothermal Research 129, 291-319.
- 1559 Rosi M, Principe C, Vecci R (1993) The 1631 Vesuvius eruption. A reconstruction based on historical  
1560 and stratigraphical data. Journal of Volcanology and Geothermal Research 58, 151-182.
- 1561 Rosi M and Santacroce R (1983) The A.D. 472 "Pollena" eruption: volcanological and petrological  
1562 data for this poorly-known, Plinian-type event at Vesuvius. Journal of Volcanology and Geothermal  
1563 Research 17, 249-271.
- 1564 Russell AJ, Knudsen O (1999) An ice-contact rhythmite (turbidite) succession deposited during the  
1565 November 1996 catastrophic outburst flood (jökulhlaup), Skeidarárjökull, Iceland. Sedimentary  
1566 Geology 127, 1-10.
- 1567 Sandri L, de' Michieli Vitturi M, Costa A, Di Vito MA, Rucco I, Doronzo DM, Bisson M, Gianardi  
1568 R, de Vita S, Sulpizio R, (~~submitted~~[this issue](#)) Lahar events in the last 2,000 years from Vesuvius  
1569 eruptions. Part 3: Hazard assessment over the Campanian Plain.
- 1570 Santacroce R, Cioni R, Marianelli P, Sbrana A, Sulpizio R, Zanchetta G, Donahue DJ, Joron JL  
1571 (2008) Age and whole rock-glass compositions of proximal pyroclastics from the major explosive  
1572 eruptions of Somma-Vesuvius: A review as a tool for distal tephrostratigraphy. Journal of  
1573 Volcanology and Geothermal Research 177, 1-18.
- 1574 Santacroce R., Sbrana A., Andronico D., Cioni R., Di Vito M., Marianelli P., Sulpizio R., Zanchetta  
1575 G., Arrighi S., Benvenuti E., Gurioli L., Leoni F.M., Luperini W., 2003. Carta Geologica del Vesuvio  
1576 in scala 1:15.000, Santacroce R., Sbrana A., eds. Cartografia derivata dai rilievi geologici in scala  
1577 1:10.000 Regione Campania e dai rilievi in scala 1:25.000 del Progetto CARG., S.EL.C.A., Firenze.
- 1578 Santangelo N, Romano P, Ascione A, Russo Ermolli E (2017) Quaternary evolution of the Southern  
1579 Apennines coastal plains: A review. Geologica Carpathica 68, 43-56.

1580 Scott KM (1989) Magnitude and frequency of lahars and lahar-runout flows in the Toutle-Cowlitz  
1581 River System. U. S. Geological Survey Professional Paper 1447-B, 1–33.

1582 Scott KM, Vallance JW, Pringle PT (1995) Sedimentology, behavior, and hazard of debris flows at  
1583 Mount Rainer, Washington. U. S. Geological Survey Professional Paper 1547, 1-56.

1584 Scott KM, Macias JL, Naranjo JA, Rodriguez S, McGeehin JP (2001) Catastrophic debris flows  
1585 transformed from landslide in volcanic terrains: mobility, hazard assessment and mitigation  
1586 strategies. US Geol Surv Prof Pap. 1630, 1-59.

1587 Sheridan MF, Bonnard C, Carrero C, Siebe C, Strauch W, Navarro M, Calero JC, Trujillo NB (1999)  
1588 Report of the 30 October 1998 rock fall/avalanche and breakout flow of Casita Volcano, Nicaragua,  
1589 triggered by Hurricane Mitch. Landslide News 12, 2-4.

1590 Siebe C, Schaaf P, Urrutia-Fucugauchi J (1999) Mammoth bones embedded in a late Pleistocene lahar  
1591 from Popocatepetl volcano, near Tocuila, central Mexico. Geological Society of America Bulletin  
1592 111, 1550-1567.

1593 [Smith G, Williams R, Rowley PJ, Parsons DR \(2018\) Investigation of variable aeration of](#)  
1594 [monodisperse mixtures: implications for pyroclastic density currents. Bulletin of Volcanology 80, 67.](#)

1595 Spence RJS, Zuccaro G, Petrazzuoli S, Baxter PJ (2004) Resistance of buildings to pyroclastic flows:  
1596 analytical and experimental studies and their application to Vesuvius. Natural Hazards Review 5, 48-  
1597 59.

1598 [Stanzione M, Di Vito MA, Aurino P, Lumaga MRB \(2023\) Sacred plant impressions from Somma-](#)  
1599 [Vesuvius volcanic ash deposits: A medicinal garden in Late Antique Acerra \(Naples, Campania,](#)  
1600 [Italy\)? Journal of Archaeological Science: Reports 47, 103802.](#)



1601 Sulpizio R, Mele D, Dellino P, La Volpe L (2005) A complex, Subplinian-type eruption from low-  
1602 viscosity, phonolitic to tephri-phonolitic magma: the AD 472 (Pollena) eruption of Somma-Vesuvius,  
1603 Italy. *Bulletin of Volcanology* 67, 743-767.

1604 Sulpizio R, Zanchetta G, Demi F, Di Vito MA, Pareschi MT, Santacroce R (2006) The Holocene  
1605 syneruptive volcanoclastic debris flows in the Vesuvian area: Geological data as a guide for hazard  
1606 assessment. *Geological Society of America Special Paper* 402, 203-221.

1607 [Sulpizio R, Dellino P, Doronzo DM, Sarocchi D \(2014\) Pyroclastic density currents: state of the art  
1608 and perspectives. \*Journal of Volcanology and Geothermal Research\* 283, 36-65.](#)

1609 Tema E, Zanella E, Pavón-Carrasco FJ, Kondopoulo D, Pavlides S (2015) Palaeomagnetic analysis  
1610 on pottery as indicator for the pyroclastic flows deposit temperature: New data and statistical  
1611 interpretation from the Minoan eruption of Santorini, Greece. *Geophysical International Journal* 203,  
1612 33-47.

1613 Thouret JC, Arapa E, Charbonnier S, Guerrero A, Kelfoun K, Cordoba G, Rodriguez D, Santoni O  
1614 (2022) Modeling tephra fall and sediment-water flows to assess their impact on a vulnerable building  
1615 stock in the City of Arequipa, Peru. *Frontiers in Earth Science* 10, 865989.

1616 Toyos G, Gunasekera R, Zanchetta G, Oppenheimer C, Sulpizio R, Favalli M, Pareschi MT (2008)  
1617 GIS-assisted modelling for debris flow hazard assessment based on the events of May 1998 in the  
1618 area of Sarno, Southern Italy: II. Velocity and dynamic pressure. *Earth Surface Processes and  
1619 Landforms* 33, 1693-1708.

1620 Vallance JW and Iverson R (2015) Lahars and their deposits. In: Sigurdsson, H., Houghton, B.F.,  
1621 McNutt, S.R., Rymer, H., Stix, J. (Eds.), *Encyclopedia of Volcanoes*. Academic Press, London, 649-  
1622 664.

1623 Vallance JW and Scott KM (1997) The Osceola mudflow from Mount Rainer: Sedimentology and  
1624 hazards implications of a huge clay-rich debris flow. Geological Society of America Bulletin 109,  
1625 143-163.

1626 Vitale S and Ciarcia S (2018) Tectono-stratigraphic setting of the Campania region (southern Italy),  
1627 Journal of Maps 14, 9-21.

1628 Voight B (1990) The 1985 Nevado del Ruiz volcano catastrophe: anatomy and retrospection. Journal  
1629 of Volcanology and Geothermal Research 42, 151-188.

1630 Waitt RB Jr, TC Pierson TC, MacLeod NS, Janda RJ, Voight B, Holcomb RT (1983) Eruption-  
1631 triggered avalanche, flood, and lahar at Mount St. Helens - Effects of winter snowpack. Science 221,  
1632 1394-1397.

1633 [Walsh B, Coviello V, Capra L, Procter J, Marquez-Ramirez V \(2020\) Insights into the internal](#)  
1634 [dynamics of natural lahars from analysis of 3-component broadband seismic signals at Volcan de](#)  
1635 [Colima, Mexico.](#)

1636 Whipple KX, Hancock GS, Anderson RS (2000) River incision into bedrock: Mechanics and relative  
1637 efficacy of plucking, abrasion, and cavitation. Geological Society of America Bulletin 112, 490-503.

1638 White S, García-Ruiz JM, Martí-Bono C, Valero B, Errea MP, Gómez-Villar A (1997) The 1996  
1639 Biescas campsite disaster in the Central Spanish Pyrenees and its spatial and temporal context.  
1640 Hydrological Processes 11, 1797-1812.

1641 [Zanchetta G, Sulpizio R, Pareschi MT, Leoni FM, Santacroce R \(2004a\) Characteristics of May 5-6,](#)  
1642 [1998 volcaniclastic debris flows in the Sarno area \(Campania, southern Italy\): relationships to](#)  
1643 [structural damage and hazard zonation. Journal of Volcanology and Geothermal Research 133, 377-](#)  
1644 [393.](#)

1645 Zanchetta G, Sulpizio R, Di Vito MA (2004b). The role of volcanic activity and climate in alluvial  
1646 fan growth at volcanic areas: an example from southern Campania (Italy). *Sedimentary Geology* 168,  
1647 249-280.

1648 ~~Zanchetta G, Sulpizio R, Pareschi MT, Leoni FM, Santacroce R (2004a) Characteristics of May 5-6,~~  
1649 ~~1998 volcanielastic debris flows in the Sarno area (Campania, southern Italy): relationships to~~  
1650 ~~structural damage and hazard zonation. *Journal of Volcanology and Geothermal Research* 133, 377-~~  
1651 ~~393.~~

1652 Zanella E, Gurioli L, Pareschi MT, Lanza R (2007). Influences of urban fabric on pyroclastic density  
1653 currents at Pompeii (Italy): 2. Temperature of the deposits and hazard implications. *Journal of*  
1654 *Geophysical Research* 112, B05214.

1655 Zanella E, Gurioli L, Lanza R, Sulpizio R, Bontempi M (2008). Deposition temperature of the AD  
1656 472 Pollena pyroclastic density current deposits, Somma-Vesuvius, Italy. *Bulletin of Volcanology*  
1657 70, 1237-1248.

1658 Zanella E, Sulpizio R, Gurioli L, Lanza R (2015). Temperatures of the pyroclastic density currents  
1659 deposits emplaced in the last 22 kyr at Somma-Vesuvius (Italy). Geological Society, London, Special  
1660 Publication, The Use of Palaeomagnetism and Rock Magnetism to Understand Volcanic Processes  
1661 396.

1662 Zaragoza G, Caballero-Garcia L, Capra L, Nieto-Torres A (2020) Lahares secundarios en el volcan  
1663 Popocatepetl: El lahar Nexpayantla del 4 de febrero, 2010. *Revista Mexicana de Ciencias Geologicas*  
1664 37, 121-134.

1665 Zuccaro G, De Gregorio D (2013) Time and space dependency in impact damage evaluation of a sub-  
1666 Plinian eruption at Mount Vesuvius. *Natural Hazards* 68, 1399-1423.
