# Supplementary material for: Lahar events in the last 2,000 years from Vesuvius eruptions. Part 1: Distribution and impact on densely-inhabited territory estimated from field data analysis
Source: Copernicus journal article supplement (doi:10.5194/egusphere-2023-1302), 2023-08-01
Supplement: Supplementary file [file egusphere-2023-1302-RC1-supplement.pdf]

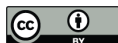

**1 Lahar events in the last 2,000 years from Vesuvius eruptions. Part 1: Distribution and impact**  
**2 on densely-inhabited territory estimated from field data analysis**

3 Mauro A. Di Vito (1,\*), Ilaria Rucco (2), Sandro de Vita (1), Domenico M. Doronzo (1), Marina Bisson (3), Mattia de'  
4 Michieli Vitturi (3), Mauro Rosi (4), Laura Sandri (5), Giovanni Zanchetta (4), Elena Zanella (6), Antonio Costa (5)

5 (1) Istituto Nazionale di Geofisica e Vulcanologia - Sezione di Napoli Osservatorio Vesuviano, Napoli, Italy

6 (2) Heriot-Watt University, School of Engineering and Physical Sciences, Edinburgh, United Kingdom

7 (3) Istituto Nazionale di Geofisica e Vulcanologia - Sezione di Pisa, Pisa Italy

8 (4) Università di Pisa, Dipartimento di Scienze della Terra, Pisa, Italy

9 (5) Istituto Nazionale di Geofisica e Vulcanologia - Sezione di Bologna, Bologna, Italy

10 (6) Università di Torino, Dipartimento di Scienze della Terra, Torino, Italy

11 \*Corresponding author: Mauro A. Di Vito (mauro.divito@ingv.it)

12

**13 Abstract**

14 Lahars represent some of the most dangerous phenomena in volcanic areas for their destructive  
15 power, causing dramatic changes in the landscape with no premonitory signs and impacting on  
16 population and infrastructures. In this regard, the Campanian Plain turns out to be very prone to the  
17 development of these phenomena, since the slopes of the Somma-Vesuvius and Campi Flegrei  
18 volcanoes, along with the Apennine reliefs are mantled by pyroclastic deposits that can be easily  
19 remobilised, especially after intense and/or prolonged rainfall.

20 This study focuses on the analysis of the pyroclastic fall and flow deposits and of the syn- and post-  
21 eruptive lahar deposits related to two sub-Plinian eruptions of Vesuvius, 472 AD (Pollena) and 1631.  
22 To begin with, historical and field data from the existing literature and from hundreds of outcrops  
23 were collected and organized into a database, which was integrated with several new pieces of data.



24 In particular, stratigraphic, sedimentological (facies analysis and laboratory) and archaeological  
25 analyses were carried out, in addition to rock magnetic investigations and impact parameter  
26 calculations. The new data are mainly referred to the finding of ash beds in more distal areas, which  
27 was included into new isopach maps for the two sub-Plinian eruptions.

28 The results show that for both the eruptions the distribution of the primary deposits is wider than the  
29 one previously known. A consequence of these results is that a wider areal impact should be expected  
30 in terms of civil protection, as the sub-Plinian scenario is the reference one for a future large eruption  
31 of Vesuvius. Such distribution of the pyroclastic deposits directly affects the one of the lahar deposits,  
32 also because a significant remobilization took place during and after the studied eruptions which  
33 involved the distal phreatomagmatic ash. From these integrated analyses, it was possible to constrain  
34 the timing of the deposition and the kind of deposits remobilized (pyroclastic fall vs. flow), as well  
35 as was possible to calculate the velocities and dynamic pressures of the lahars, and ultimately infer  
36 the lahar transport and emplacement mechanisms.

37 The multidisciplinary approach adopted in this work shows how it is crucial to assess the impact of  
38 lahars in densely populated areas even at distances of several to tens of km from active volcanoes.  
39 This especially applies to large parts of the densely populated areas around Somma-Vesuvius up to  
40 the nearby Apennine valleys.

41 Keywords: Somma-Vesuvius; Apennine valleys; pyroclastic deposits; lahars; areal distribution; local  
42 impact.

43

#### 44 **1. Introduction**

45 The emplacement of volcanoclastic mass flows, and the consequent damage along the flanks of active  
46 volcanoes and perivolcanic plains, represent a constant threat to inhabited areas and populations (e.g.,  
47 Waitt et al., 1983; Lowe et al., 1986; Pierson, 1985; Newhall and Punongbayan, 1996). These



48 phenomena are triggered by various mechanisms, among which the most common are intense or  
49 prolonged atmospheric precipitations (Arguden and Rodolfo, 1990; Rodolfo and Arguden, 1991;  
50 Pareschi et al., 2000; Rodolfo, 2000; Scott et al., 2001; Vallance and Iverson, 2015). Such  
51 precipitations, especially during and/or immediately after the eruptions, cause the detachment of  
52 landslides that can evolve into lahars (e.g., White et al., 1997; Sheridan et al., 1999; Scott et al., 2001).  
53 The last century was affected by a significant number of highly-impacting lahar events associated to  
54 well-studied explosive volcanic eruptions worldwide, such as for example at Colima (Mexico) in  
55 1913 (Rodriguez-Sedano et al., 2022), Nevado del Ruiz (Colombia) in 1985 (Voight, 1990), Ruapehu  
56 (New Zealand) in 2007 (Lube et al., 2012), and Merapi (Indonesia) in 2011 (Jenkins et al., 2015).  
57 According to Rodolfo (2000), Sulpizio et al. (2006), and Vallance and Iverson (2015), volcanoclastic  
58 mass flows can be generated at variably long time-intervals, spanning from eruption to post-eruptive  
59 phases of tens to hundreds years. In case they are directly related to volcanic eruptions or are  
60 penecontemporaneous to them (i.e., during or shortly after the eruptive event), lahars are defined as  
61 syn-eruptive, and can represent an important hazard factor in the short to middle term for perivolcanic  
62 areas (Rodolfo, 2000; Sulpizio et al., 2006). On the other hand, in case they are unrelated to any  
63 eruption dynamics, so occurring during volcanic quiescence, they are defined as post- or inter-  
64 eruptive (Vallance and Iverson, 2015), and can represent a long-term hazard factor (e.g., Siebe et al.,  
65 1999; Pareschi et al., 2002; Zanchetta et al., 2004a, 2004b; Sulpizio et al., 2006). Usually, these latter  
66 are not accounted for in assessing volcanic hazard, although their study is important for long-term  
67 territorial planning.

68 In this sense, i.e. from the hazard assessment point of view, one of the priorities concerns the  
69 assessment of those areas potentially exposed to such a threat, taking into account the temporal  
70 recurrences of the phenomena (during days to months after an eruption, or years to decades after) and  
71 the physical features of the volcanoclastic mass flows (volume, thickness, velocity, dynamic pressure,  
72 concentration, and invasion areas).

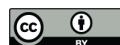

73 A lot of the existing literature analyzed the hazard related with volcaniclastic mass flows on the flanks  
74 of active volcanoes, through the reconstruction of historical and prehistoric events (e.g., Scott, 1989;  
75 Scott et al., 1995; Vallance and Scott, 1997), by using empirical relationships or physical models  
76 (e.g., Macedonio and Pareschi, 1992; Costa, 1997; Iverson et al., 2000). However, the areas affected  
77 by these phenomena can be extended well beyond the boundaries of the volcanic complex, also  
78 including the surrounding plains and the downwind-lying mountainous areas, which are subjected to  
79 tephra fallout sometimes even at great distances from the volcano (e.g., Siebe et al., 1999; Pareschi  
80 et al., 2000, 2002; Zanchetta et al., 2004a, 2004b; Di Crescenzo and Santo, 2005). In these areas,  
81 volcaniclastic mass flows may cause victims and damages, even where considered safe or scarcely  
82 affected by other volcanic hazards.

83 In this paper, we present the results of a multidisciplinary study, including geomorphological,  
84 stratigraphic, sedimentological and rock magnetic investigations, as well as impact parameter  
85 calculations by reverse engineering from the deposits. These investigations followed several  
86 surveying campaigns carried out in natural exposures, archaeological excavations, and trenches dug  
87 specifically for this purpose in the plain surrounding the Vesuvius edifice and along the Apennine  
88 valleys (Fig. 1). One of the goals of the study is to show the presence of lahar deposits even in areas  
89 very far from both the Apennine hills and the valleys of Somma-Vesuvius, demonstrating the high  
90 mobility of these flows. Technically, the ones descending on the Apennine flanks should be termed  
91 as volcaniclastic debris flows; here we merge into an only one term, lahars, to indicate secondary  
92 mass flows strictly related to specific eruptions. The study of the past deposits has been useful for the  
93 understanding of the feeding drainage basins for different types of volcaniclastic mass flows, their  
94 extent and facies variations with distance from the source area, and their environmental impact. As  
95 already pointed out by Di Vito et al. (2013, 2019), in the past 4.5 ka repeated lahar and flooding  
96 episodes related to the main eruptions of Somma-Vesuvius and Campi Flegrei volcanoes strongly  
97 stroke the Campanian Plain and its human settlements, influencing their abandonment or evidencing  
98 attempts of resettlement. In particular, for the areas around Vesuvius, these phenomena included: i)

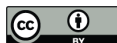

99 large volume and high energy lahars, originated from the volcanic edifice, which affected the volcanic  
100 apron; ii) large flooding phenomena affecting the Campanian plain; iii) lahars originated from the  
101 perivolcanic mountains that affected the Apennine valleys and invaded the areas of the plain at their  
102 mouth. The data and pieces of information described here were the basis for validating a new model  
103 for lahar transport (de' Michieli Vitturi et al., submitted), which was applied for assessing the related  
104 hazard at Vesuvius and Campanian Plain (Sandri et al., submitted).

105 The structure of the work consists of a geological, geomorphological, stratigraphic and  
106 sedimentological **integrated** study, a paleomagnetic and sediment-mechanic impact assessment  
107 calculation, and a comprehensive discussion on the lahar problem in the Campanian Plain.

108

## 109 **2. Geological setting**

110 The study area is part of the Campanian Plain, which includes the lowlands surrounding Mount  
111 Vesuvius volcano and the nearby Apennine ridges and valleys (Fig. 1). The orography of the area is  
112 characterized by three WNW-ESE trending mountain ridges that border eastward the plain, with an  
113 elevation ranging from 500 to 1600 m a.s.l., and slope angles from 30 to 60°. From north to south,  
114 the Avella-Partenio, Lauro-Visciano and Sarno-Quindici mountain ridges are separated by two  
115 depressions: the Avella-Baiano valley, in which the alluvial plain of the Clanio river occur, and the  
116 Lauro valley. Both are narrow valleys that widen toward north-west, among the cities of Cicciano,  
117 Nola and Palma Campania (Fig. 1). The reliefs are characterized by a high drainage density,  
118 associated with a poorly developed and torrential hydrographic network, which over time has favored  
119 the incision and dismantling of the pyroclastic cover on the ridges, and the development of numerous  
120 detrital conoids that connect with the main valley floor (Di Vito et al., 1998).

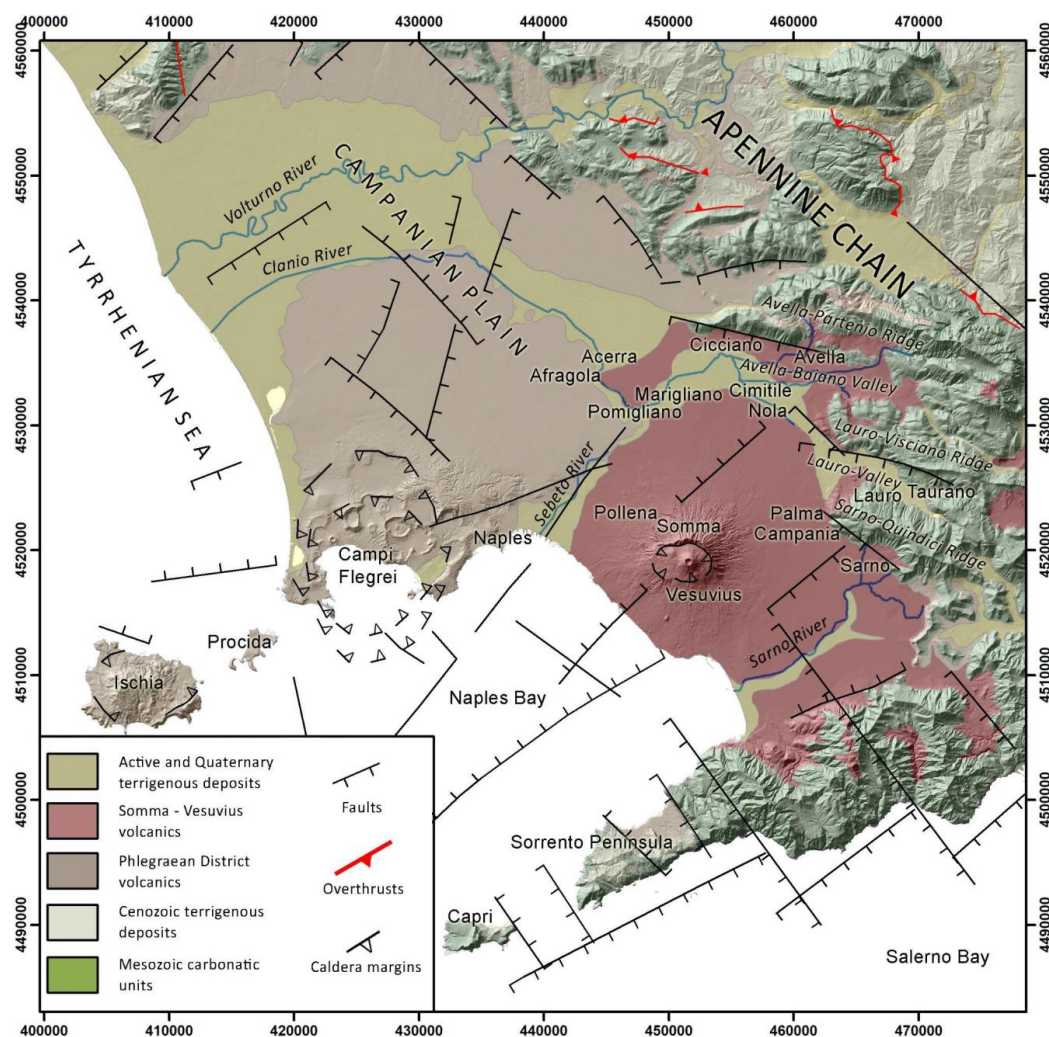

121

122 Fig. 1. Geological and structural sketch of the Campania Region on a Shaded Relief derived from TIN ITALY DEM. The  
 123 coordinates are expressed in WGS 84 UTM N33 (modified after Orsi et al., 1996).

124

125 Mount Vesuvius is a composite central volcano with a well-developed radial drainage network, which  
 126 feeds an extensive volcanoclastic apron that morphologically connects the edifice with the  
 127 surrounding plain (Santacroce et al., 2003). It represents the active southern termination of the Plio-  
 128 Quaternary volcanic chain that borders the eastern Tyrrhenian margin (Peccerillo, 2003). Volcanism  
 129 in this margin is related to the extensional tectonic phases that accompanied the anticlockwise rotation

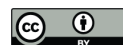

130 of the Italian peninsula, during the complex interaction between the Africa and Eurasian plates, which  
131 generated the Apennine thrust-and-fold belt (Ippolito et al., 1973; D'Argenio et al., 1973; Finetti and  
132 Morelli, 1974; Bartole, 1984; Piochi et al., 2004; Patacca and Scandone, 2007; Vitale and Ciarcia,  
133 2018). The extension along the Tyrrhenian margin of the Apennine chain was accommodated by the  
134 activation of NW-SE normal faults and NE-SW normal to strike-slip transfer fault systems, which  
135 dismembered the chain in horst and graben structures, and allowed magmas to reach the surface and  
136 feed the volcanism (Mariani and Prato, 1988; Faccenna et al., 1994; Acocella and Funiciello, 2006).  
137 The Campanian Plain is one of these grabens that hosts the Neapolitan volcanic area. It is a NW-SE  
138 elongated structural depression, filled by a thick sequence of marine and continental sedimentary  
139 deposits, and volcanic-volcaniclastic successions that compensated its subsidence, leading to a  
140 complete emersion at around 39 ka (Brocchini et al., 2001; De Vivo et al., 2001; Santangelo et al.,  
141 2017). This graben is bordered toward NW, NE and SE by the Meso-Cenozoic carbonate and  
142 terrigenous successions of the Apennine chain, and is subdivided in minor NE-SW oriented horst-  
143 and-graben structures (Carrara et al., 1973; Finetti and Morelli, 1974; Fedi and Rapolla, 1987;  
144 Brancaccio et al., 1991). Neapolitan volcanoes lie on these second order structural highs (Marotta et  
145 al., 2022 and reference therein), and the products of their most powerful eruptions blanketed the  
146 Apennine reliefs and filled their valleys with several meter-thick cover of loose pyroclastic deposits,  
147 composed of pumice lapilli and ash layers separated by paleosoils (Pareschi et al., 2002; Bisson et  
148 al., 2007; Cinque and Robustelli, 2009).

149 In terms of drainage of the water, the pyroclastic cover has peculiar geotechnical characteristics,  
150 which enabled the development of lahars in the area. In particular, coarser pumice layers are  
151 characterized by interconnected inner voids that control water accumulation, instead soils and  
152 paleosoils by a high water retention capacity (Andosol-like soils), so that the differential behavior  
153 can regulate equilibrium among deposits stability vs. remobilization (Fiorillo and Wilson, 2004).

154 Regarding the volcanic activity of Vesuvius in the last 2,000 years, the largest eruptions after the 79  
155 CE Plinian one were two sub-Plinian eruptions, the 472 CE Pollena and 1631 ones, but several other



156 effusive and explosive events frequently occurred in historical times. In the Campanian Plain, lahar  
157 deposits related to these two eruptions are quite abundant, also the sub-Plinian scenario is of interest  
158 for civil protection purposes, which is why in the present work we focus on these reference explosive  
159 eruptions. Throughout the work, a particular attention is put on distribution of the primary pyroclastic  
160 deposits and the related syn-eruptive lahars, which are mass flow events strictly related to specific  
161 eruptions, even if the condition is not necessarily that of an event contemporaneous to the eruption;  
162 those deposits are mainly composed by >90% fragments from the parental eruption (Sulpizio et al.,  
163 2006). The syn-eruptive feature is thus related to the involvement of pyroclastic deposits more than  
164 to the exact timing of emplacement, the latter being of the order of max a few years (before significant  
165 humification processes can occur).

166

### 167 3. Materials and methods

#### 168 3.1. Evidence from historical sources

169 We collected data from historical sources, maps, documents, and newspapers to supplement the  
170 geological data, gathered directly or indirectly, for the definition of the areal distribution of the syn-  
171 eruptive and post-eruptive lahar deposits at Vesuvius and in the surrounding region. Such collection  
172 concerned the phenomena that took place starting from the sixteenth century CE to 2005. This time  
173 span has been chosen depending on data availability, and to show the high recurrence of events over  
174 time in the area. The data were collected and grouped not only by years but also by the municipal  
175 areas existing at those times. It should be noted that the distribution of the data can be affected by the  
176 different urbanization over time, and by the presence of damage to people, things, economic activities  
177 and settlements. In the absence of local instrumental meteorological series, corresponding to the  
178 analyzed period, we assumed that the phenomena of remobilization of the pyroclastic deposits, and  
179 the consequent generation of large alluvial events and volcaniclastic mass flows, coincided with  
180 extreme weather events often described and reported in the analyzed sources. The reports reach a



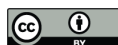

181 quite significant number, approximately 500, and concern 97 municipalities. The data were organized  
182 in a geospatial database, so that it was possible to define different areas affected by frequent syn-  
183 eruptive floods and lahars, concomitant/related with the sub-Plinian eruption of 1631, to be used as  
184 benchmark for the main geological analyses. With reference to the Pollena eruption, there are no  
185 historical sources for similar occurrences other than documents deriving from archaeological  
186 excavation activities (see next sections).

187 The municipalities with the highest number of reports are: Sarno (43), Salerno (32), Siano (26), Vietri  
188 sul Mare (22), Bracigliano (21), Nocera Inferiore (20), Maiori (19), Quindici (17) (Fig. 1). The events  
189 of greatest intensity, which affected more than five municipal territories at the same time, are 19; they  
190 likely were multiple soil-slip debris flows. Some of these occurrences result closely connected with  
191 the volcanic events of Vesuvius, such as those that occurred in 1631, 1823, 1910, 1949 and 1954,  
192 simultaneously or within months to a few years after the eruptions of 1631, 1822, 1906 and 1944.  
193 The absence of information in the Lauro and Avella-Baiano Valleys is likely due to the absence of  
194 detailed descriptions of alluvial events, or most likely to the position of the inhabited areas generally  
195 located on the hills thus far from the lower part of the valleys.

196

### 197 **3.2. Field and archaeological investigations**

198 We used a set of geological, stratigraphical, sedimentological, archaeological, and pedological  
199 information for the reconstruction of the type of events, their emplacement mechanisms, timing, and  
200 impact on pre-existing structures/environment. Such an approach enabled us to cross-check  
201 geological and archaeological evidence allowing us to accurately fix the age of events. Conversely,  
202 the presence of well-dated primary pyroclastic deposits can define the age of human traces otherwise  
203 not easily datable. Furthermore, the identification of the “primary” (fallout and pyroclastic current,  
204 along with the archeological findings) can give the absolute age (*ante* or *post quem*) of a given deposit.  
205 The definition of isochronic paleosurfaces can also contribute to the reconstruction of the paleo-

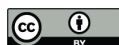

206 environments affected by the deposition, and of the variations that occurred during depositional  
207 processes. For this purpose, particular attention was paid to the basal contacts between the deposits.  
208 In some areas like Nola, the lahar deposits directly overlie the primary pyroclastic deposits (of Pollena  
209 or 1631 eruption), while in other cases some units or the whole primary deposits are missing (eroded)  
210 or lacking. Only the correlation with the nearby areas permitted to define whether the emplacement  
211 of the secondary deposits eroded partly or entirely the primary deposits, vice versa the absence was  
212 “simply” due to their distribution. The analysis of the internal structure marked by sharp changes in  
213 grain sizes, color, presence of erosive unconformities, or interposition of lenses of coarser material  
214 also permitted the identification of one or more flow units within the same individual deposit package.  
215 The macroscopic characteristics of the sequences permitted some inferences on the transport and  
216 depositional mechanisms, while the componentry analysis provided information of the source  
217 deposits that were remobilized. This brings to another important definition, that is syn- vs post-  
218 eruptive lahars, according to the definition of Sulpizio et al. (2006), which applies respectively soon  
219 after the eruption vs. years to centuries after the eruption ended. The macroscopic analysis allowed  
220 us to distinguish between the syn-eruptive deposits, which are defined by the occurrence of  
221 pyroclastic components with homogeneous lithology, similar to the primary deposits, and the post-  
222 (or inter-) eruptive deposits, characterized by evidence of depositional stasis, such as humified  
223 paleosurfaces, evidence of anthropic activity, or also through deposits that contain humified material  
224 and/or fragments of older eruptions following the progressive erosion within the feeding slopes and  
225 valleys. All these characteristics allowed the correlation between the various volcanoclastic units for  
226 the whole set of the studied sequences, marking the differences needed to hypothesize on the source  
227 and invasion areas.

228 We reviewed all the volcanological and archaeological data collected during the last 20 years from  
229 drill cores, outcrops, archaeological excavations, and from the existing literature, in collaboration  
230 with colleagues of the Archaeological Superintendence of Campania region. The preliminary  
231 collection and analysis of the existing data permitted to plan a hundred of new stratigraphic trenches



232 (Fig. 2), with the aim of collecting stratigraphic, stratimetric, sedimentological, lithological and  
233 chronological data on the sequences both of primary pyroclastic and secondary (lahar) deposits.  
234 Particular attention was paid to the primary pyroclastic deposits and to syn- and post-eruptive lahars,  
235 and to their geometric relations with the paleotopography and the preexisting anthropic structures.

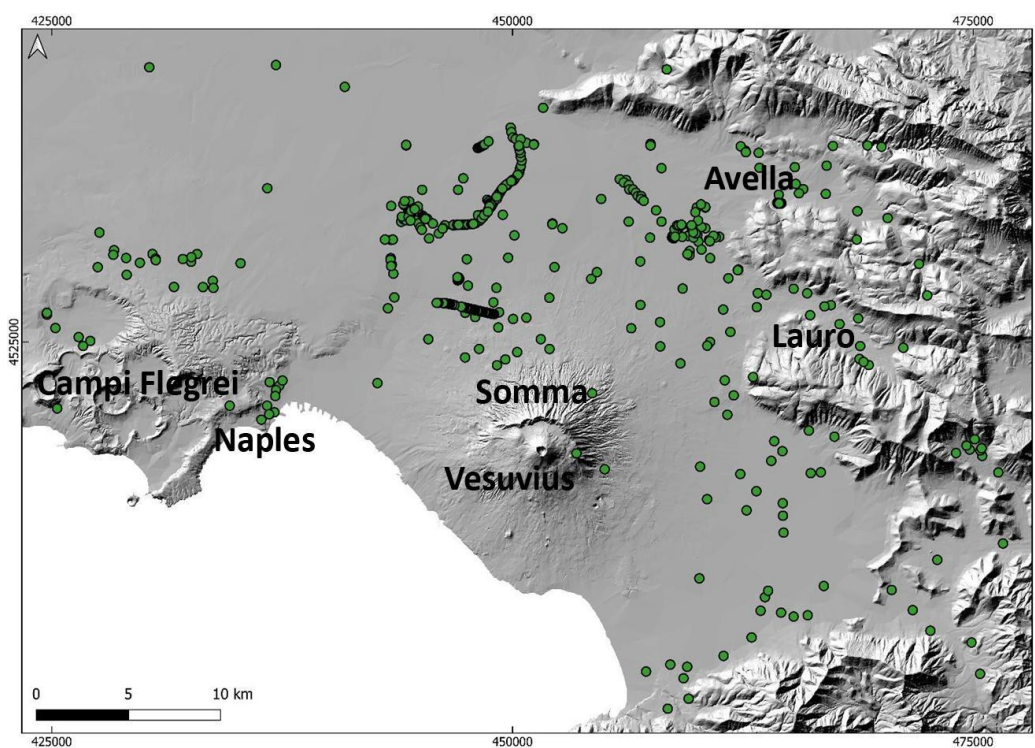

236  
237 Fig. 2. Shaded relief of the studied area and location of all the sites where stratigraphic analyses were carried out.

238

239 The collected data were organized into a geospatial database (QGIS Platform), in which each point  
240 represents an investigated site linked to a series of information as the precise location, the kind of  
241 volcanic sequence, and the stratimetric features (primary and secondary units, thickness, type of  
242 deposit, etc). The data were visualized using a Digital Elevation Model (DEM) of the Campanian  
243 Plain as reference topography and the UTM WGS 84 – Zone 33N reference projection.

244

### 245 3.3. Geomorphological analysis

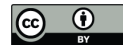

246 This analysis is aimed at identifying the macro-basins that fed the lahars in the study area after the  
247 two sub-Plinian eruptions (Pollena and 1631). The analysis was carried out on the basis of the slopes  
248 distribution and the watersheds extracted from a Digital Elevation Model (DEM). The DEM was  
249 derived from a LiDAR flight of 2012 ~~and stored with~~ cell size of 10 m. In particular, six macro-basins  
250 characterized by slopes  $> 20^\circ$  were identified in the Somma-Vesuvius area, whereas fifteen macro-  
251 basins with slopes  $> 25^\circ$  were identified in the Apennines to the East of the volcano (Fig. 3). The  
252 different slopes thresholds are defined starting from previous studies (Pareschi et al., 2000, 2002; see  
253 also Bisson et al., 2013, 2014), and on the basis of a better analysis of the physical characteristics of  
254 the remobilized material, in turns related to the various types of deposits. In fact, along the slopes of  
255 Somma-Vesuvius, they are mainly ash-rich pyroclastic current deposits, while for the Apennines they  
256 are ash and lapilli fallout deposits emplaced along the variably-deep slopes. Each basin was  
257 considered as a single feeding unit for the lahars generation, and this is an input for the modeling of  
258 possible future lahars in the companion papers (de' Michieli Vitturi et al., submitted; Sandri et al.,  
259 submitted).

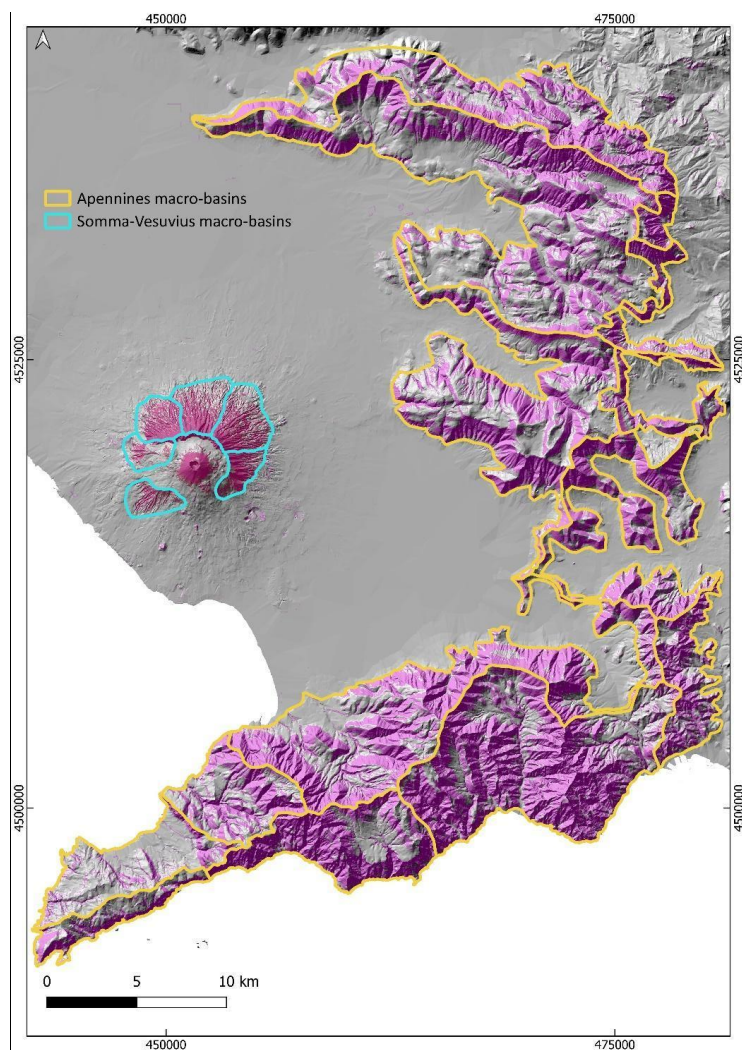

260

261 Fig. 3. The macro-basins defined on the basis of their geomorphological features to study the areas of possible  
262 accumulation and mobilization of deposits, which are used in modeling lahar generation of future events.

263

### 264 3.4. Laboratory and analytical work

#### 265 3.4.1. Grain-size

266 In several sites among all the studied ones (Fig. 4), macroscopic analysis of the stratigraphic  
267 sequences was first carried out in the field to identify any homogeneities or similarities between the



268 juvenile fraction of the primary and secondary deposits, and recognize the various volcanoclastic  
269 units. This was followed by sampling the deposits and carrying out the laboratory analyses.  
270 In particular, the sampling was mostly made on the syn-eruptive lahar deposits, but also on the post-  
271 eruptive and, in a few cases, on the primary pyroclastic deposits. All lab analyses were performed in  
272 the laboratories of sedimentology and optical microscopy at the Istituto Nazionale di Geofisica e  
273 Vulcanologia, Sezione di Napoli Osservatorio Vesuviano (INGV – OV). The material samples were  
274 pre-heated at a temperature of 60-70 °C to eliminate any fraction of humidity, then were quartered  
275 and sieved. To avoid any breaking of fragile clasts like pumices, the dry sieving of the grain-size  
276 classes between -4 (a coarse limit variable depending on the sample) and 0 phi was made manually,  
277 while for the classes between 0.5 and 5 phi a mechanical sieving apparatus was used.  
278 The fine ash-rich deposit samples with high degree of cohesion were first ~~combined with~~ distilled  
279 water and thus boiled to remove all the ash aggregates, before being analyzed for granulometry  
280 following a wet procedure. In the post-processing of the data, the GRADISTAT excel package by  
281 Blott and Pye (2001) was used to determine the main statistical parameters. On selected samples, a  
282 microscopic componentry analysis was performed, consisting of recognizing and separating the  
283 various lithotypes that compose the volcanoclastic deposits, that is juvenile, lithic and crystal clasts.  
284 The clasts recognition was made manually for the coarser fractions, while for the finest fractions it  
285 was necessary the use of a reflected-light binocular microscope.  
286



287

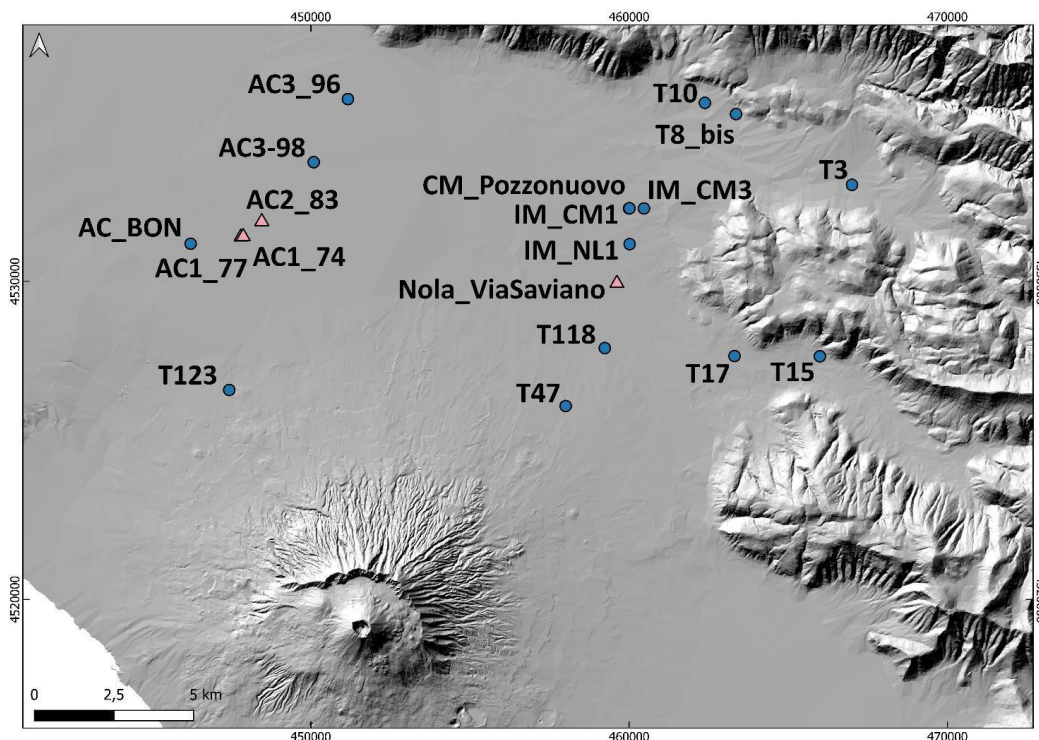

288

289 Fig. 4. Location of sites in which the sampling was carried out for sedimentological and paleomagnetic analyses. The  
290 pink triangles represent the sites for which a paleomagnetic study was carried out.

291

### 292 3.4.2. Input for impact parameters

293 A significant number of large clasts and boulders was also found embedded in the ash matrix of the  
294 lahar deposits at different locations. These clasts have dimensions from several centimeters to several  
295 tens of centimeters in diameter, and their nature is variable, that is limestone, ceramic, brick, tephra,  
296 lava, sandstone, iron (in order of abundance). Most of the clasts are fragments of artifacts from  
297 buildings, structures, and other archaeological finds of the Roman period, and their shape can be  
298 approximated in the field to ellipsoid. All these features suggest that they were entrained from  
299 substrate into the lahars to ultimately be deposited together with the ash. In the dynamics of  
300 volcanoclastic mass flows like lahars and pyroclastic currents, the occurrence of boulder entrainment



301 by flow dynamic pressure is recognized as a it is quite common feature (e.g., Zanchetta et al., 2004a;  
302 Pittari et al., 2007; Duller et al., 2008; Toyos et al., 2008; Cas et al., 2011; Carling, 2013; Doronzo,  
303 2013; Jenkins et al., 2015; Roche, 2015; Martí et al., 2019; Guzman et al., 2020). The capability of a  
304 flow to entrain a clast is a function of flow properties (velocity, density) and clast properties  
305 (dimension, density, shape), and dynamic pressure well syntheses and quantifies such capability also  
306 in terms of flow hazard (Toyos et al., 2008; Zuccaro and De Gregorio, 2013; Jenkins et al., 2015). In  
307 Appendix 1, a theoretical scheme is presented to invert these field features for calculation of the  
308 impact parameters at local scale.

309

### 310 **3.4.3. Rock magnetism**

311 The lahar deposits related to the Pollena eruption were analyzed by rock magnetism at two localities,  
312 Acerra and Nola. We sampled both the deposit matrix and some potsherds embedded along three  
313 trenches (74, 77 and 83) and in the “Nola-Via Saviano” excavation (Fig. 4). The purpose of the  
314 magnetic measurements was threefold: i) evaluating the magnetic fabric of the deposits to infer the  
315 local to regional flow directions of the lahars and possibly their origin, whether Apennine or from  
316 Vesuvius; ii) estimating the deposition temperature ( $T_{dep}$ ) of the deposits, to understand whether the  
317 lahar was triggered soon after the eruption or at later times; iii) testing the relative sequence  
318 (contemporaneity) of the lahars emplacement with respect to the Pollena eruption. All hand-samples  
319 were oriented *in-situ* with magnetic and solar compasses and reduced to standard sizes at the CIMaN-  
320 ALP laboratory (Peveragno, Italy), where all the magnetic measurements were made. In Appendix 2,  
321 the adopted paleomagnetic techniques are described.

322

## 323 **4. Results**

### 324 **4.1. Field stratigraphy and sedimentological features**



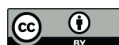

325 In this study, data of about 500 sites were collected, covering an area of >1000 km<sup>2</sup> from the plain  
326 around the volcanic edifice to the Apennine valleys to the north and east (Fig. 2).

327

#### 328 **4.1.1. Pyroclastic deposits: eruptions of Pollena and 1631**

329 The integration of the collected data with the existing ones (Rosi and Santacroce, 1983; Rosi et al.,  
330 1993; Rolandi et al., 2004; Sulpizio et al., 2005; Perrotta et al., 2006; Bisson et al., 2007; Santacroce  
331 et al., 2008; Gurioli et al., 2010; De Simone et al., 2011) allowed the reconstruction of the distribution  
332 maps for both the fallout and pyroclastic current deposits. In particular, the spatial distribution  
333 highlights that for both the Pollena and 1631 primary deposits, thick fine ash deposits are widely  
334 distributed and cover the coarse fallout sequence or directly the ground, modifying the isopachs  
335 reconstructed by previous authors (Sulpizio et al., 2006 and references therein; Figs. 5 and 6). This  
336 enlargement of the area affected can have important implications on the hazard evaluation in terms  
337 of possible damages on a densely inhabited territory.

338 The area covered by the comprehensive isopach maps (including both the lapilli fallout and ash  
339 fallout) turns out to be wider than the one previously known, above all because we also took into  
340 account for the ash deposited by fallout during final stages of the eruptions, mostly dominated by  
341 phreatomagmatic explosions (Rosi and Santacroce, 1983; Sulpizio et al. 2005). The great distribution  
342 and availability of these ash deposits could explain the wide generation and distribution of the **syn-**  
343 eruptive lahars in the area. This has important implications in the evaluation of the source area and  
344 of the material available for lahars accompanying and following this eruption. In particular, there is  
345 an increase of the area covered by pyroclastic deposits and the calculated volume of the emitted  
346 products. For example, the area covered by the pyroclastic current deposits thus results in 200 km<sup>2</sup>  
347 for the Pollena eruption, and 120 km<sup>2</sup> for the 1631 eruption, while for the fallout deposits it is 433  
348 km<sup>2</sup> and 427 km<sup>2</sup>, respectively. Another implication is that the wide presence of fine and **cohesive**  
349 **ash** on top of the coarse fallout sequences and, in general on the ground, **reduces the permeability of**



350 **the substrate**, preventing the infiltration of the water and favoring **the stream formation**. They can also  
351 enhance the mobility of the flows by creating sliding surfaces.  
352

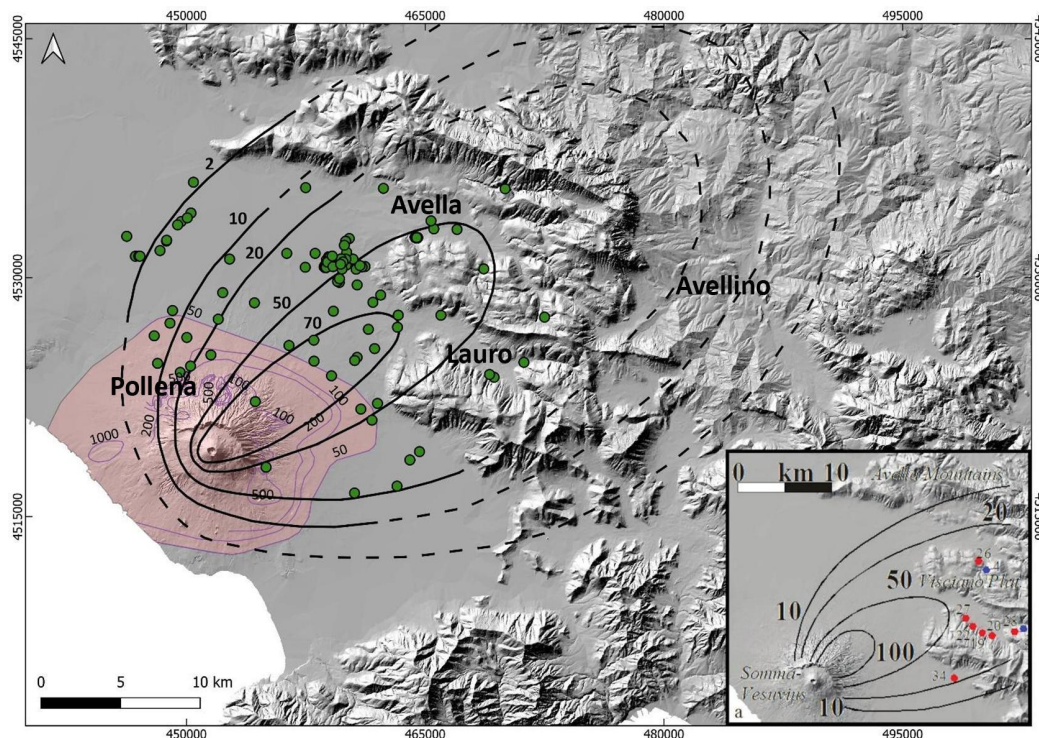

353  
354 Fig. 5. Pollena eruption: the black lines represent the isopachs of the fallout deposits modified after Sulpizio et al., 2006  
355 (in the insert) on the basis of the new collected data (green dots), while in pink is colored the area affected by PDC  
356 deposits, modified after Gurioli et al. (2010) (purple lines).

357



358

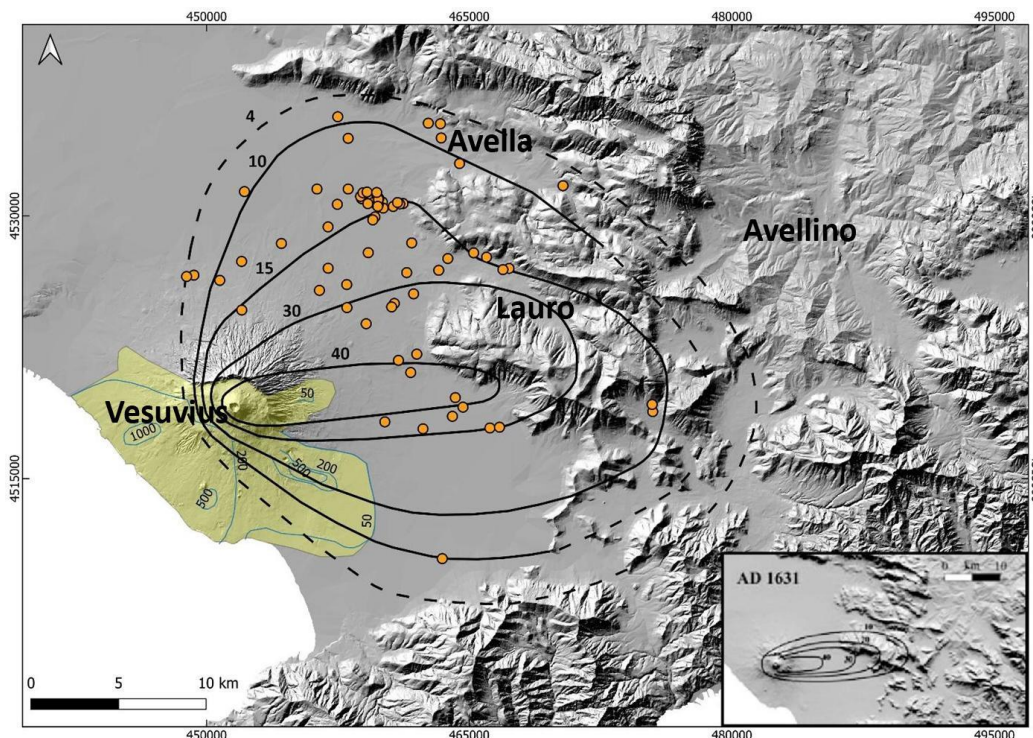

359

360 Fig. 6. 1631 eruption: the black lines represent the isopachs of the fallout deposits, modified after Santacrocce et al., 2008

361 (in the inset) on the basis of the new collected data (orange dots), while in yellow is colored the area affected by PDC

362 deposits. The light blue lines represent the inferred distribution on the basis of an integration between field data and fonts,

363 modified after Gurioli et al. (2010).

364

365 The significant **widening** of the area affected by accumulation of the tephra fallout deposits,

366 particularly towards the north for the 1631 eruption, follows the inclusion of the final ash deposits

367 into the new isopachs. Interestingly, such widening agrees with the wide occurrence of lahars in the

368 plain north of Vesuvius, as documented in the chronicles and sources (Rolandi et al., 1993; Rosi et

369 al., 1993, and references therein), and as follows.

370

#### 371 4.1.2. Lahar deposits



372 The lithological and sedimentological analyses allowed the definition of the primary pyroclastic  
373 deposits **involved in** the remobilization. In many cases, the archaeological findings permitted to define  
374 the local paleoenvironment and the land use, and also to constrain the age and timing of deposition.  
375 The lithofacies mostly recognized are **P to indicate paleosoil and humified surface, mL and mA**  
376 **(massive lapilli and massive ash, respectively) to indicate the primary deposits, while the lahar**  
377 **deposits usually belong to the facies Gms and mM, which indicate massive, matrix-supported gravel**  
378 **deposits and massive lahar deposits, respectively. Other recognized lithofacies are Sh, Ss and fM. Sh**  
379 **indicates hyper-concentrated flow deposits, and consists of an alternation of coarse and fine beds. Ss**  
380 **includes scour and fill structures, and consists of an erosive, concave-upwards basal surface and a**  
381 **planar/convex top. fM is fine mud, and indicates the decantation deposit formed when the flow loses**  
382 **its energy.**

383 Usually, the **syn-eruptive** lahar deposits directly overlie the primary deposits, sometimes eroding  
384 them. They have a matrix-supported texture and are **composed** of fine to very fine **cohesive ash**, and  
385 contain scattered and more or less abundant pumices and lithic fragments. They are generally  
386 composed of multiple depositional units, each one resulting from single **“en masse” transport**. The  
387 different flow units are distinguishable (still in continuity) from each other based on vertical  
388 granulometric changes, pumice alignments, internal lamination and/or unconformities. Compared,  
389 for example, with **channeled** pyroclastic currents, dense water flows and floods, such units could have  
390 been repeatedly emplaced under **accumulation rates** of several tens to a few hundreds kg/m<sup>2</sup>s (Lowe,  
391 1988; Russell and Knudsen, 1999; Whipple et al., 2000; Girolami et al., 2010; Roche, 2015; Marti et  
392 al., 2019; Guzman et al., 2020). **In various areas, the “en masse” transport is suggested by the presence**  
393 **of water escape structures through the whole deposit and sequence of units. These are vertical**  
394 **structures consisting of small vertical “pipes” filled by fine mud, transported by the escaping water,**  
395 **formed soon after the emplacement of the lahar.** The lithological characteristics are variable even  
396 within the same site, but the deposits are generally massive, contain **vesicles** from circular to flattened  
397 and **coated by fine ash**. For the syn-eruptive lahar deposits, the fragments are those of the primary



398 deposits, while in the upper parts of the sequences it is not uncommon to find units that contain  
399 pumices fragments related to previous eruptions, in particular the 9.0 ka B.P "Mercato" and the 3.9  
400 ka B.P. "Avellino" Plinian eruptions. In this case, these deposits are considered post-eruptive. Also,  
401 the presence in the sequences of slightly humified surfaces or evidence of human artifacts, such as  
402 for example excavations, plowing, etc, are considered as constraints for a long non-deposition, and  
403 lahars generation is considered as post-eruptive. In other words, the componentry of the secondary  
404 vs. primary pyroclastic deposits for the two sub-Plinian eruptions, as well as the vertical continuity  
405 between the fallout and lahar deposits, are strong indicators of the syn-eruptive occurrence of the  
406 lahar events. Instead, the absence of such features is more indicative of a post-eruptive origin, with  
407 lahars events also more spaced in time from the corresponding eruption.  
408 In Appendix 3, a description is reported for some of the most representative sequences, which were  
409 sampled in different areas throughout the plain (Figs. 2 and 4).

410

#### 411 **4.1.3. Distribution maps of the lahar deposits**

412 Here we present the distribution maps for the lahar deposits of the eruption of Pollena and 1631 (Figs.  
413 7-10). In particular, the syn-eruptive Pollena lahar deposits are distributed in the NW quadrants of  
414 the volcano and in the Avella, Lauro and Sarno valleys (see Fig. 1), with a thickness exceeding 1 m  
415 in the Vesuvius apron and in the plain between Nola and Cimitile (see Figs. 1 and 7). A volume  
416 estimation of the remobilized deposits is  $73 \times 10^6 \text{ m}^3$  for the northern Vesuvius area and  $42 \times 10^6 \text{ m}^3$   
417 for the Lauro Valley.



418

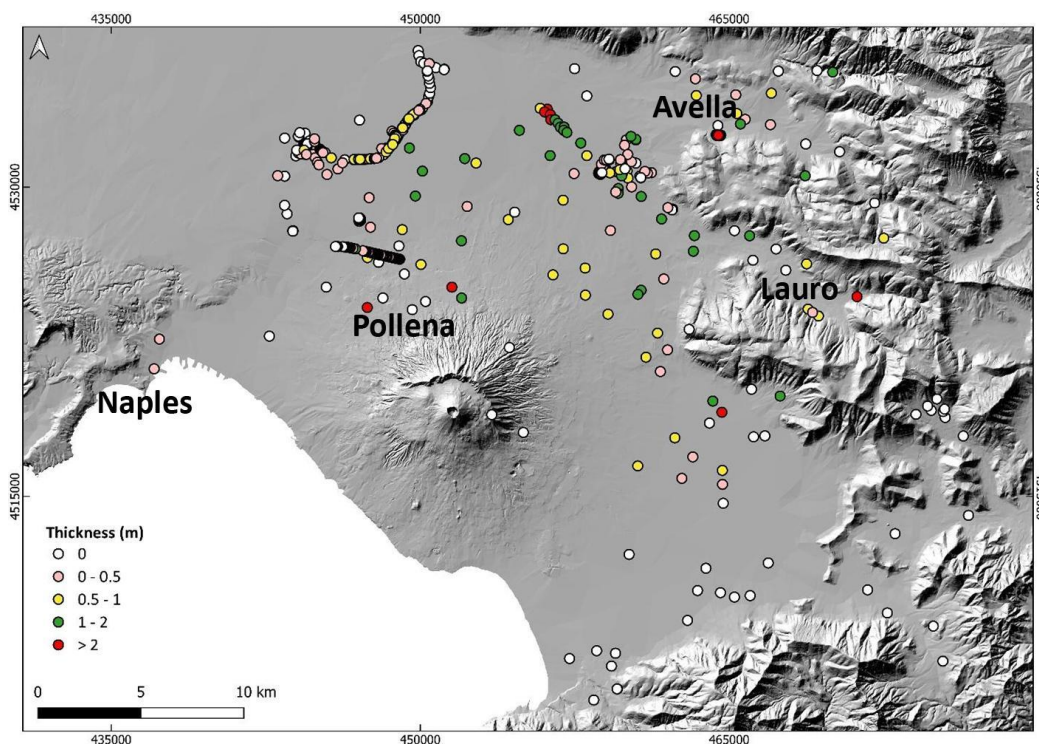

419

420 Fig. 7. Distribution of the syn-eruptive lahar deposits related to the Pollena eruption.

421

422 The post-eruptive deposits of the Pollena eruption are more **concentrated** in the Avella and Lauro  
423 valleys, and in the plain north of the volcano close to the apron area (low-angle edifice outer slopes)  
424 (Figs. 1 and 8). Their deposits contain both fragments from the Pollena eruption and from preceding  
425 eruptions, suggesting that pyroclastic deposits of the older sequences were progressively eroded and  
426 involved in remobilization processes over time. As an example, in Figs. A3a-d it is possible to  
427 recognize whitish pumice fragments from the Pomici di Avellino and Mercato eruptions on top the  
428 Pollena lahar deposits.



429

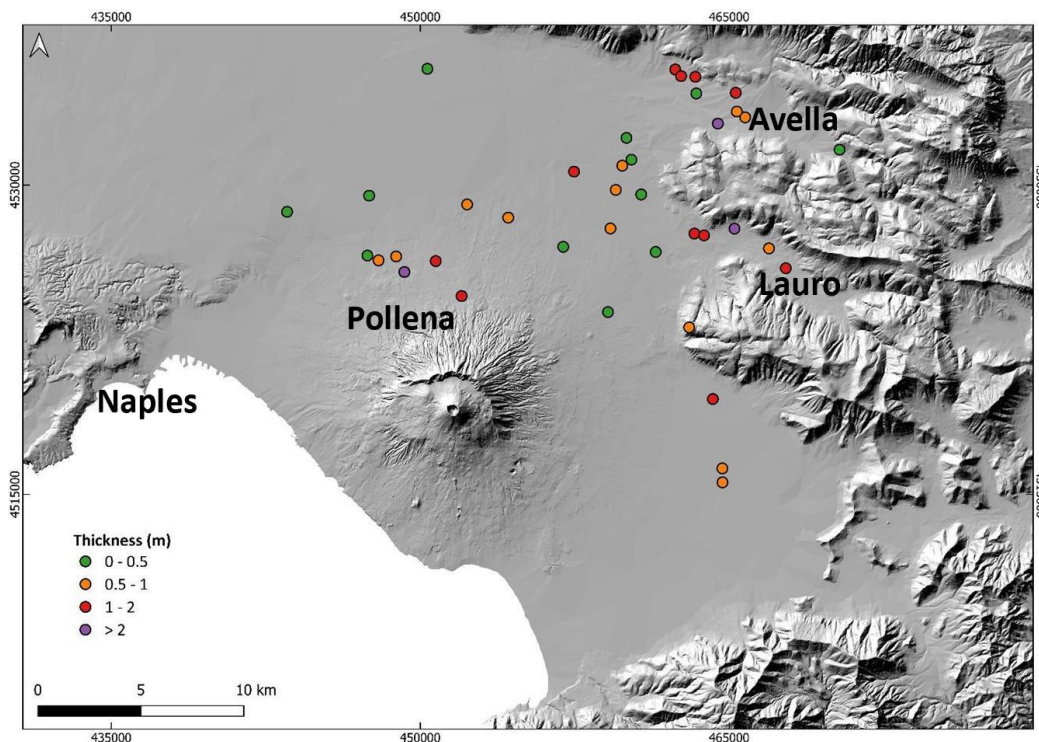

430

431

Fig. 8. Distribution of the post-eruptive lahar deposits related to the Pollena eruption.

432

433 Above the Pollena primary and secondary deposits (meaning after the emplacement of the Pollena  
434 lahars), the studied sequences in almost all the sites show the presence of a well-developed soil bed  
435 with many traces of cultivation, as well as of the presence of inhabited areas and buildings (Figs.  
436 A3a-d). These traces and the presence of a well-developed soil bed are evidence of a progressive  
437 geomorphological stabilization of the territory. The occurrence of the 1631 sub-Plinian event  
438 determined a new phase of marked geomorphological instability for a large territory surrounding the  
439 volcano. In Fig. 9, it is shown the distribution of the syn-eruptive lahar deposits in all the studied  
440 areas with variable thickness, generally <50 cm. They affected mostly the areas of Acerra-Nola,  
441 Sarno, the Vesuvius apron and the Apennine valleys (Figs. 1 and 9). Rosi et al. (1993) and Sulpizio  
442 et al. (2006) reported that floods and lahars heavily impacted (also with injuries and victims) the N  
443 and NE quadrants of Somma-Vesuvius soon after the eruption with a timescale of days (Rosi et al.,



444 1993; see also the historical chronicles of Braccini, 1632), corroborating the syn-eruptive behavior of  
445 such lahars. Furthermore some lahars are also intercalated within the primary pyroclastic deposits,  
446 while generally **they stand in continuity** on top of the primary deposits (Rosi et al., 1993); both cases  
447 unequivocally constrain the syn-eruptive behavior of the 1631 lahars.  
448

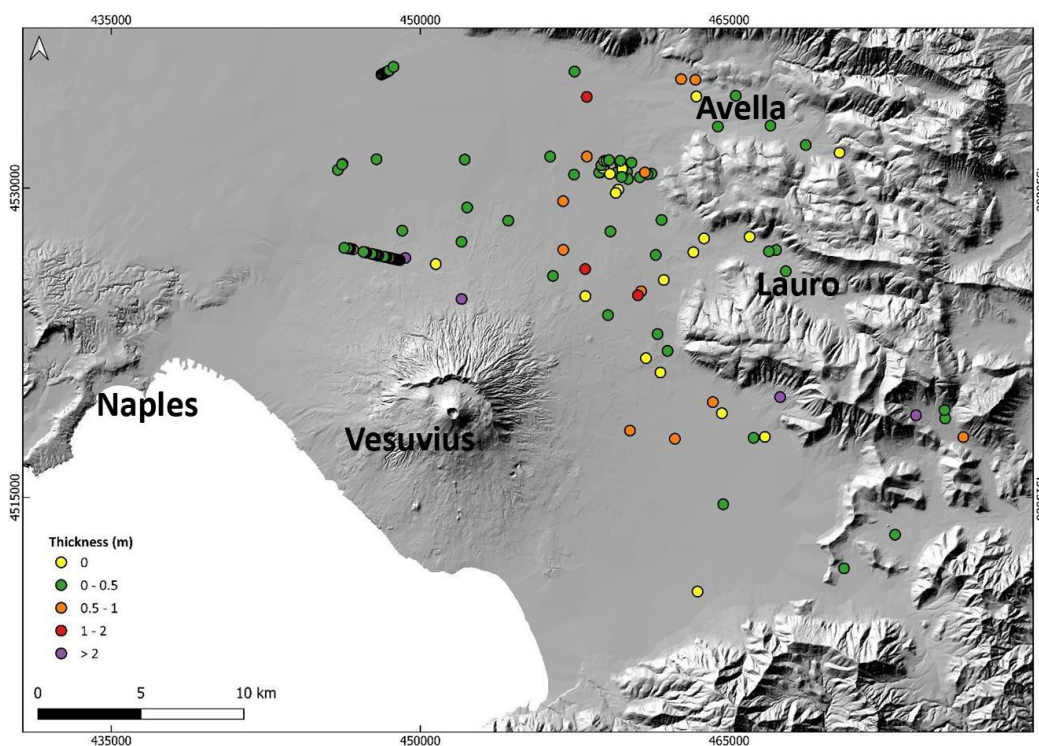

449  
450 Fig. 9. Distribution of the syn-eruptive lahar deposits related to the 1631 eruption.

451

452 Minor post-eruptive lahar deposits of the 1631 eruption are reported in Fig. 10, with a preferential  
453 distribution to the E quadrants of the volcano from N to S, both in the plain and the valleys. These  
454 deposits are still significant, with a thickness of around half a meter to a meter or more in a few points.





455

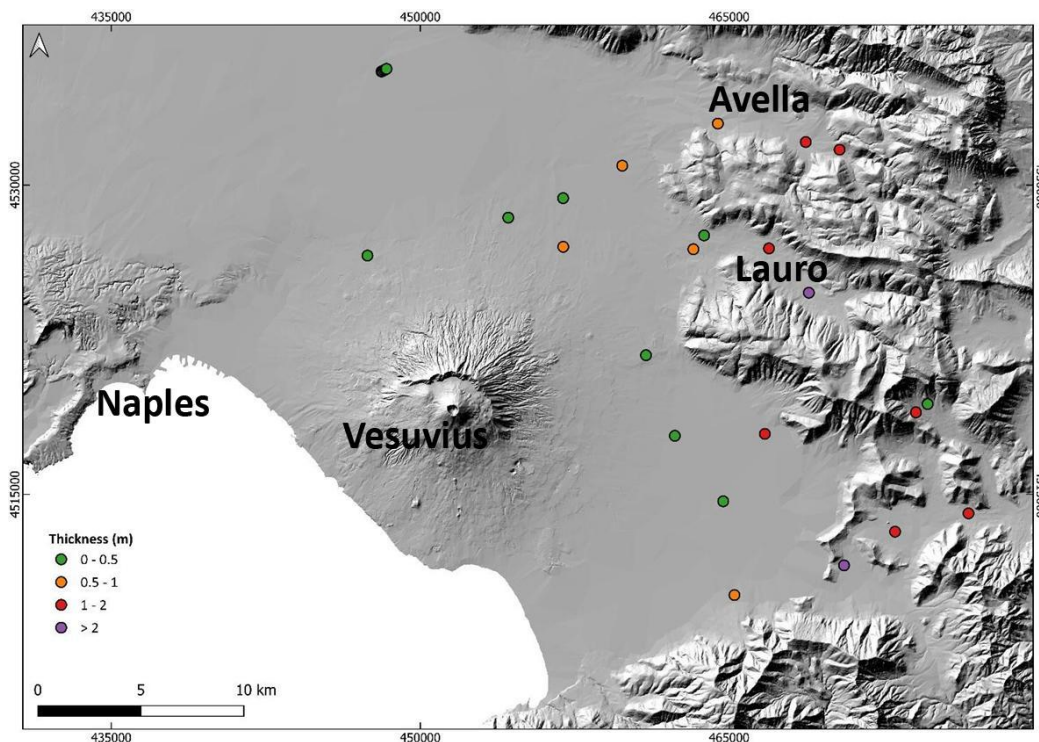

456

457

Fig. 10. Distribution of the post-eruptive lahar deposits related to the 1631 eruption.

458

#### 459 4.1.4. Sedimentological characteristics of the Pollena lahar deposits

460

The field analysis carried out on about 500 studied sites, and the laboratory analysis carried out on

461

30 selected samples contribute both to the distinction between syn- and post- eruptive lahars in the

462

area. The results of the grain-size analyses in the form of histograms and statistical parameters are

463

presented in Fig. 11 and Tab. 1.

464

The juvenile pumice clasts are an ubiquitous component of deposits, but they decrease with distance

465

toward the finer grain-size classes, while the crystal content increases in the same progression. The

466

lithic clasts are abundant in the coarser classes, they decrease with distance in the middle grain-size

467

classes, and increase again in the finer classes.

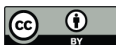

### Vallo di Lauro

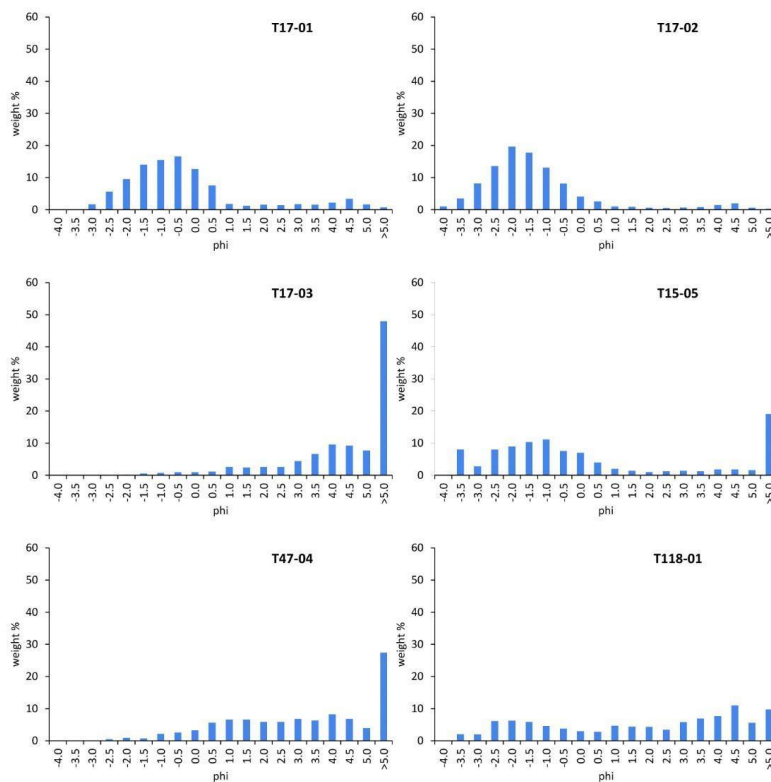

### Somma-Vesuvius

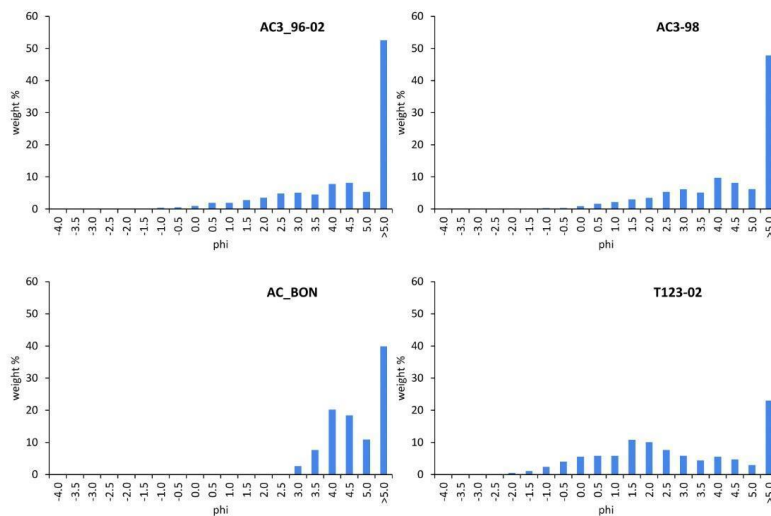



### Valle di Avella

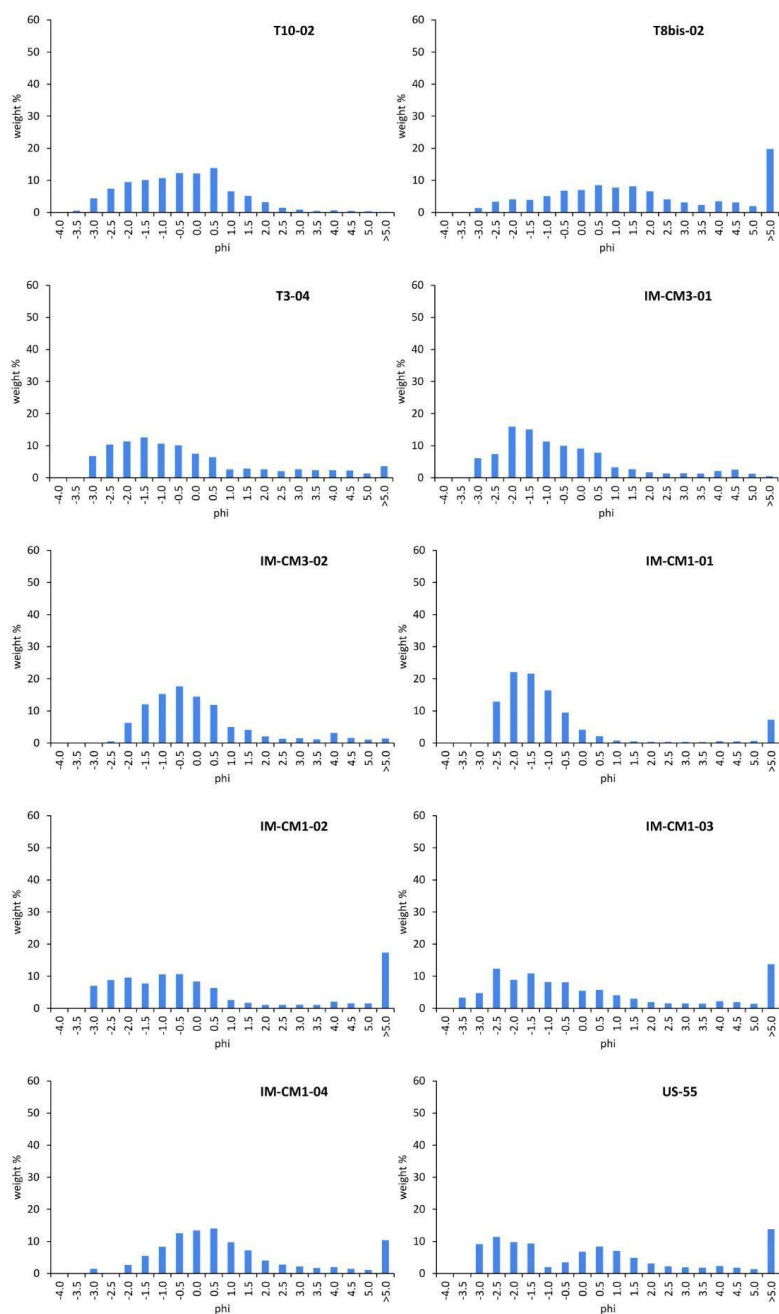

469

470

471

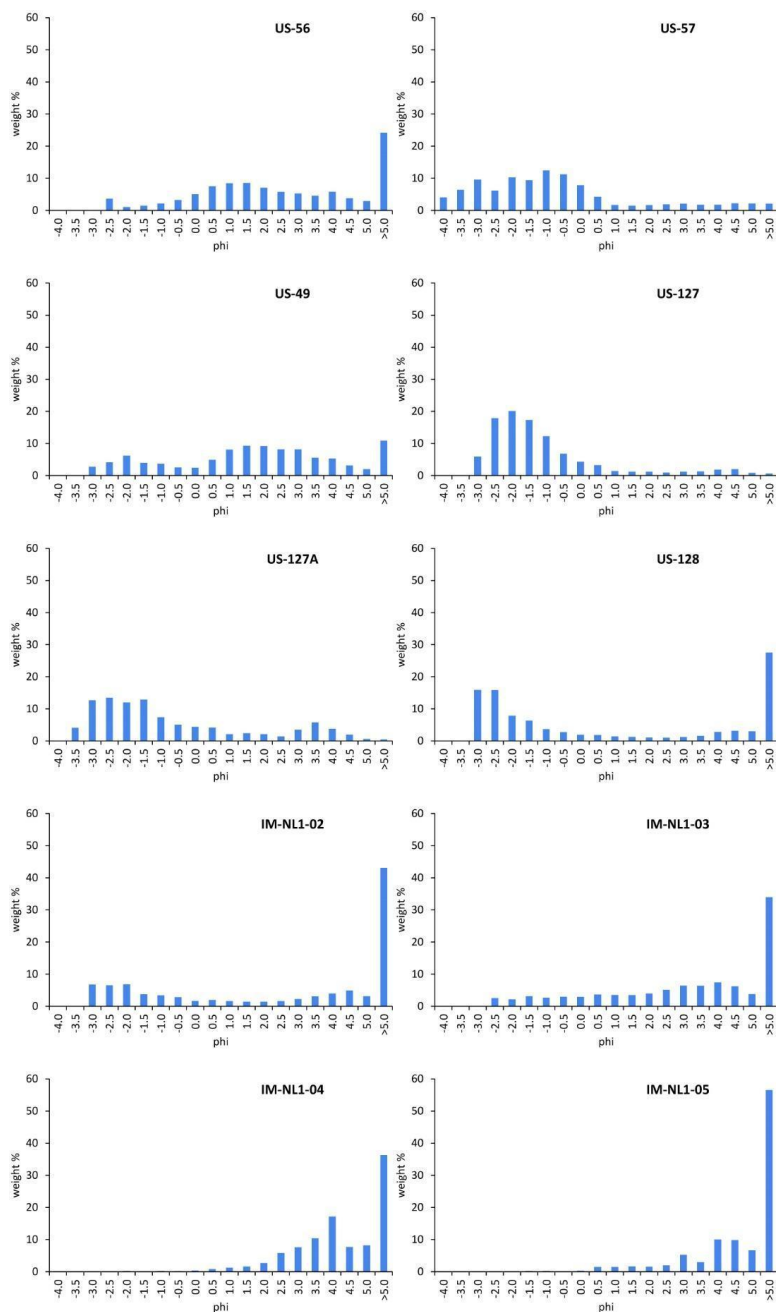

472

473 Fig. 11. Histograms of the grain-size analysis on selected samples for the **locations reported in Fig. 4.**

474



| SAMPLE                      | MODE 1 | MODE 2 | MODE 3 | SKEWNESS | SORTING | FACIES |
|-----------------------------|--------|--------|--------|----------|---------|--------|
| <b>Lauro Valley</b>         |        |        |        |          |         |        |
| T17-01                      | -0.743 |        |        | 1.179    | 1.464   | Gms    |
| T17-02                      | -2.243 |        |        | 1.532    | 1.404   | Gms    |
| T17-03                      | 0.747  | 3.731  |        | -1.054   | 1.481   | Sh     |
| T15-05                      | -3.743 | -1.243 | 3.731  | 0.890    | 1.752   | Gms    |
| T47-04                      | 1.247  | 3.731  |        | -0.447   | 1.579   | Mm     |
| T118-01                     | -2.243 | 0.747  | 3.731  | -0.049   | 2.352   | Gms    |
| <b>Avella-Baiano Valley</b> |        |        |        |          |         |        |
| T10-02                      | 0.247  |        |        | 0.274    | 1.457   | Sh     |
| T8bis-02                    | -2.243 | 0.247  | 1.247  | -0.009   | 1.742   | Sh     |
| T3-04                       | -1.743 | 1.247  | 3.237  | 0.881    | 1.789   | Gms    |
| IM-CM3-01                   | -2.243 |        |        | 1.015    | 1.587   | Gms    |
| IM-CM3-02                   | -0.743 | 3.731  |        | 1.134    | 1.379   | Gms    |
| IM-CM1-01                   | -2.243 |        |        | 1.954    | 1.010   | Gms    |
| IM-CM1-02                   | -2.243 | -1.243 | 3.731  | 0.932    | 1.633   | Gms    |
| IM-CM1-03                   | -2.743 | -1.743 | 0.247  | 0.810    | 1.809   | Gms    |
| IM-CM1-04                   | 0.247  |        |        | 0.406    | 1.394   | Fm     |
| US-55                       | -2.743 | 0.247  | 3.731  | 0.495    | 1.941   | Gms    |
| US-56                       | -2.743 | 1.247  | 3.731  | -0.402   | 1.700   | Sh     |
| US-57                       | -3.243 | -2.243 | -1.243 | 0.756    | 1.860   | Gms    |
| US-49                       | -2.243 | 1.247  |        | -0.460   | 2.012   | Gms    |
| US-127                      | -2.243 |        |        | 1.686    | 1.507   | Gms    |
| US-127A                     | -2.743 | -1.743 | 3.237  | 0.914    | 2.167   | Gms    |
| US-128                      | -3.243 | 3.731  |        | 1.434    | 1.990   | Gms    |
| IM-NL1-02                   | -3.243 | -2.243 | 3.731  | 0.609    | 2.378   | Gms    |
| IM-NL1-03                   | -1.743 | 0.247  | 3.731  | -0.458   | 1.996   | Gms    |
| IM-NL1-04                   | 3.731  |        |        | -1.698   | 0.995   | Mm     |
| IM-NL1-05                   | 1.247  | 2.737  | 3.731  | -1.137   | 1.224   | Mm     |
| <b>Somma-Vesuvius</b>       |        |        |        |          |         |        |
| AC3_96-02                   | 0.247  | 2.237  | 3.731  | -0.734   | 1.245   | Mm     |
| AC3-98                      | 2.737  | 3.731  |        | -0.838   | 1.197   | Mm     |
| AC_BON                      | 3.731  |        |        | -3.026   | 0.425   | Mm     |
| T123-02                     | 0.247  | 1.247  | 3.731  | -0.228   | 1.420   | Mm     |

475

476 Tab. 1. Statistical parameters extracted from the grain-size analyses. Mode 1, 2 and 3 indicate the coarsest, medium and

477 fine modes, respectively.

478



479 Field observations and statistical granulometric parameters (modes, skewness, sorting), highlight  
480 significant differences between the sectors of Lauro Valley, Avella-Baiano Valley, and Somma-  
481 Vesuvius. A common feature between the three sectors is that the lahar deposit samples are mostly  
482 massive, poorly-sorted and **polimodal**; only a few samples are **moderately**-sorted and unimodal. On  
483 the other hand, the grain-size modes extracted show some interesting differences. The coarse modes  
484 for Lauro Valley and Avella-Baiano Valley span from fine/medium lapilli to coarse ash, while for  
485 Somma-Vesuvius span from coarse to fine ash. The medium modes for Lauro Valley and Avella-  
486 Baiano Valley span from coarse to medium ash, while for Somma-Vesuvius span from medium to  
487 fine ash. The fine modes for Lauro Valley and Avella-Baiano Valley, and for Somma-Vesuvius span  
488 from medium to fine ash. Also, the skewness values for Lauro Valley and Avella-Baiano Valley show  
489 a fine-to-coarse mode while for Somma-Vesuvius show a coarse code. All these differences basically  
490 depend on the origin of the primary pyroclastic deposits, fallout vs. pyroclastic currents, which were  
491 remobilized from different sectors, Apennines and Somma-Vesuvius. The analysis of the above  
492 described granulometry is used to **inform the model** of lahar transport (de' Michieli Vitturi et al.,  
493 submitted) aimed at assessing the related hazard (Sandri et al., submitted).

494

#### 495 **4.2. Magnetic results**

496 Both Acerra and Nola localities show a well-defined magnetic fabric. Principal susceptibility axes  
497 are clustered, and the magnetic **anisotropy  $P_j$  is mostly lower than 1.060 but can reach high values ( $P$**   
498  **$= 1.200$ ).** At Acerra, the **magnetic foliation** is always dominant, and the fabric is oblate. The  $P_j$  is  
499 linearly correlated to the mean susceptibility ( $k_m$ ). The magnetic fabric has a horizontal magnetic  
500 foliation and a clustered magnetic lineation, whose mean direction is NE-SW. Considering the chaotic  
501 nature of the lahar deposits, the high  $P_j$  and the clustered susceptibility axes can highlight a  
502 channelized flow (Fig. 12). At Nola, instead, the fabric is both prolate/oblate, and  $P_j$  is lower than  
503 1.040. The susceptibility axes are more dispersed than Acerra, but mean magnetic lineation clearly

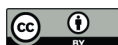

504 shows a NW-SE direction. If one considers the oblate specimens only, the magnetic foliation is sub-  
505 horizontal, on the contrary, the magnetic foliation of the prolate specimens is steeply dipping ( $65^\circ$ )  
506 toward SE. At Nola, the flow direction inferred by AMS is consistent and parallel to the invasion  
507 basin.

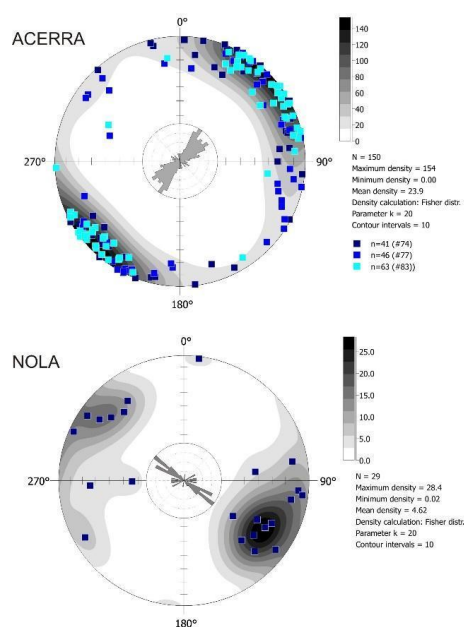

508

509 Fig. 12. Equal area projection and Rose diagram of the  $K_1$  directions at Acerra and Nola.

510

511 The deposition temperature is low at both deposits. At Acerra the  $T_{dep}$  interval is 120-140 °C, while  
512 for Nola  $T_{dep}$  is lower than 120 °C (Fig. 13). In the Nola case, a low temperature magnetization  
513 component lower than 120 °C cannot be directly considered as a TRM. In fact, the low  $T_b$  Earth's  
514 field component of magnetization can also be produced by a viscous remanent magnetization (VRM),  
515 acquired during exposure to weak fields (Bardot and McClelland, 2000). The acquisition of the VRM  
516 depends on the duration of the exposure. For age around that of the Pollena eruption, the minimum  
517  $T_{dep}$  which can be distinguished is ca. 120 °C. For this reason, we considered the Nola lahar to be  
518 emplaced at low temperature.

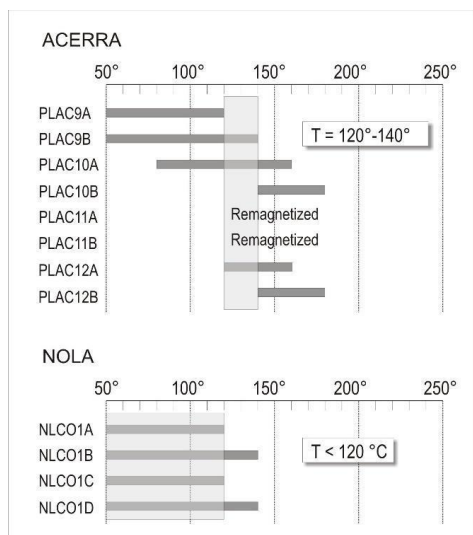

519

520 Fig. 13. Deposition temperature at Acerra and Nola. The site  $T_{dep}$  is estimated from the overlapping reheating temperature  
521 ranges for all lithic clasts sampled.

522

523 The mean paleomagnetic direction for each locality, calculated using Fisher's statistics, is well-  
524 defined and is statistically distinguishable at the 95% confidence limit (Fig. 14). Therefore, the lahar  
525 deposits of these two localities are not synchronous.

526 Overall, all magnetic measurements just discussed show distinctly different characters between  
527 Acerra and Nola, clearly indicating two distinct events of emplacement.

528

529



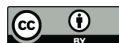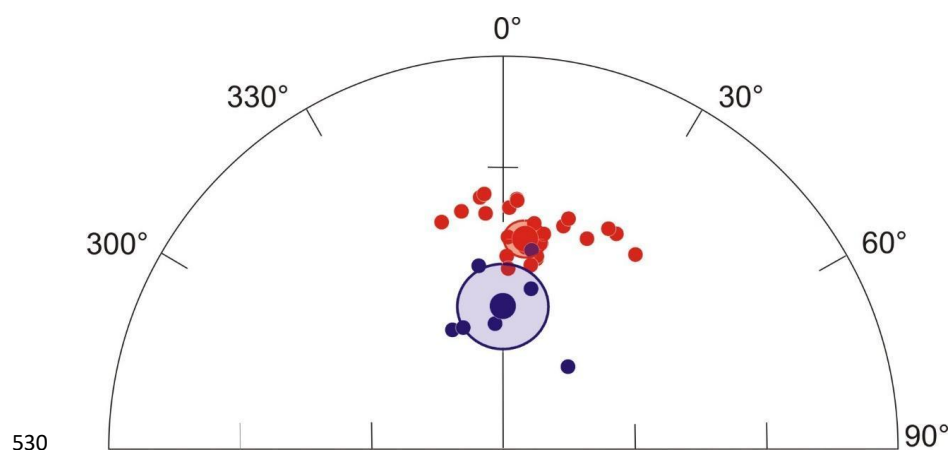

530  
531 Fig. 14. Equal-area projection of the characteristic remanent magnetization directions, and their mean value with  
532 associated confidence limit, from Acerra (red dots, mean value:  $n=26$   $D=7.5^\circ$ ,  $I=43.4^\circ$ ,  $\alpha_{95}=3.5^\circ$ ), and Nola (blue  
533 dots, mean value:  $n=7$ ,  $D=0.8^\circ$ ,  $I=60.2^\circ$ ,  $\alpha_{95}=9.0^\circ$ ).

534

### 535 4.3. Lahar dynamics

536 By inverting the field evidence and data, it is possible to reconstruct the macroscopic flow dynamics  
537 that occurred in the lahar invasion, which are particularly interesting to understand the impact that  
538 those lahars had on the Vesuvius territory. As already described, the lahar deposits show thicknesses  
539 that are variable from several centimeters to a few meters, and this can depend on multiple local  
540 factors: i) topography; ii) distance from source; iii) erosion; iv) source area and type of remobilized  
541 sediment (variably sized fallout vs. flow deposits). In particular, thicker deposits are found near the  
542 mouth of the valleys and in the flat alluvial plain, as shown in the deposit distribution maps. On the  
543 other hand, the deposits show on the whole a tabular-like shape, and the average thickness is of the  
544 order of 0.5-1 m, which is the first evidence of the lahars impact. In terms of runout distance, the  
545 lahars traveled for 10 to 15 km from sources (Somma-Vesuvius and Apennine detachment areas),  
546 measured directly on the deposit distribution maps. These important quantitative constraints are used  
547 to validate and inform lahar numerical models (de' Michieli Vitturi et al., submitted) and simulations  
548 (Sandri et al., submitted) for hazard assessment. We cannot rule out that lahar pulses from different



549 source areas (Somma-Vesuvius vs. Apennines) might have overlapped in the open plain.  
550 At several locations, we found erosive unconformities between (Fig. 15a) the lower and upper flow  
551 units (Fig. 15b), as well as between primary pyroclastic deposits and lahar units. Erosion is an  
552 important factor for the entrainment of preexisting material including large-size clasts. Size and  
553 density of the largest clasts embedded in the deposits can give an idea of the carrying capacity of the  
554 lahars.  
555

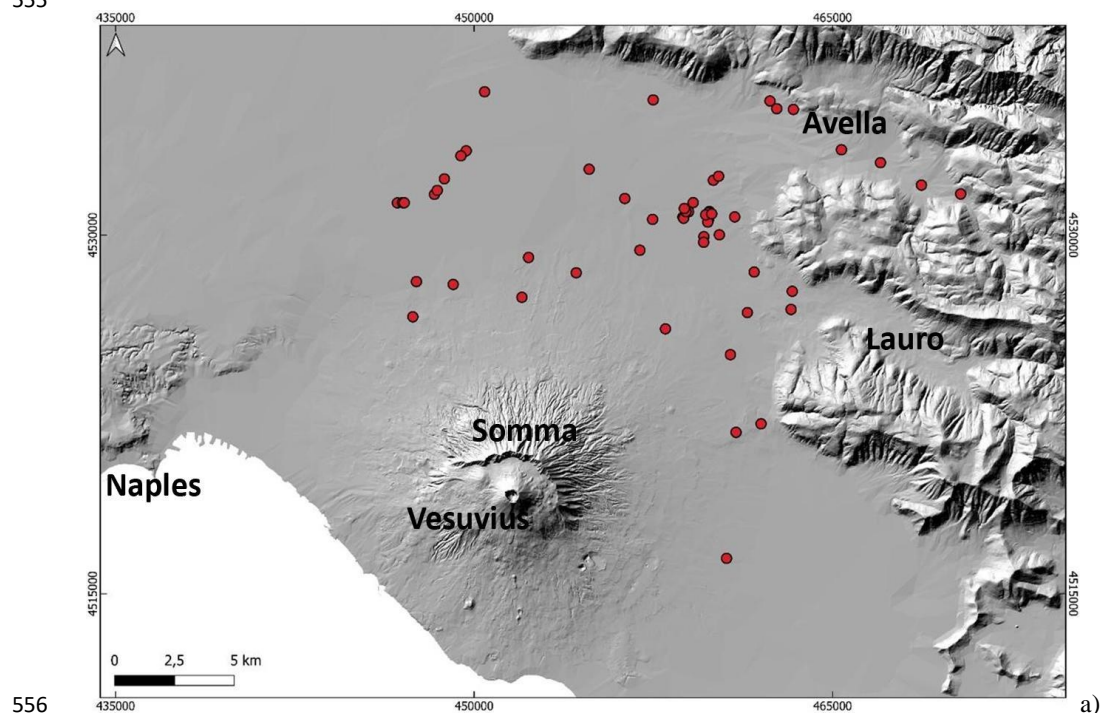

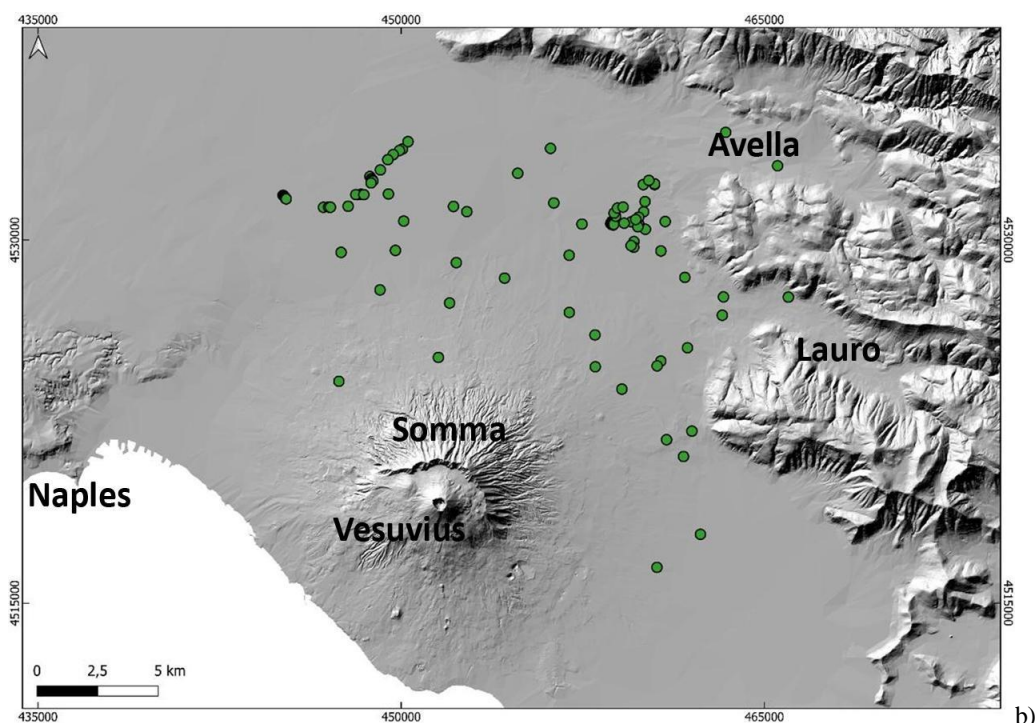

558 Fig. 15. a) Sites with evident erosion traces at the base of the lahar units; b) Sites in which multiple flow units are vertically  
559 identified.

560

561 Evidence of **oversize** clasts are observed in all the studied areas, **with a distribution that is similar to**  
562 **the one of the deposits themselves (but with less proportions)**, and particularly at the mouth of the  
563 valleys, and in the alluvial plain (Fig. 15a). The presence of the erosional features, and the fact that  
564 the deposits are ubiquitously massive, suggest that **high transport and deposition** were not exclusive  
565 **processes, i.e. they both occurred even at local scale.**

566 **We calculated local velocities of the syn- and post-eruptive lahars based on the biggest clasts that are**  
567 **found in the deposits, with dimensions from several centimeters to a meter, and for flow density  $\geq$**   
568 **water density (Appendix 1).**

569

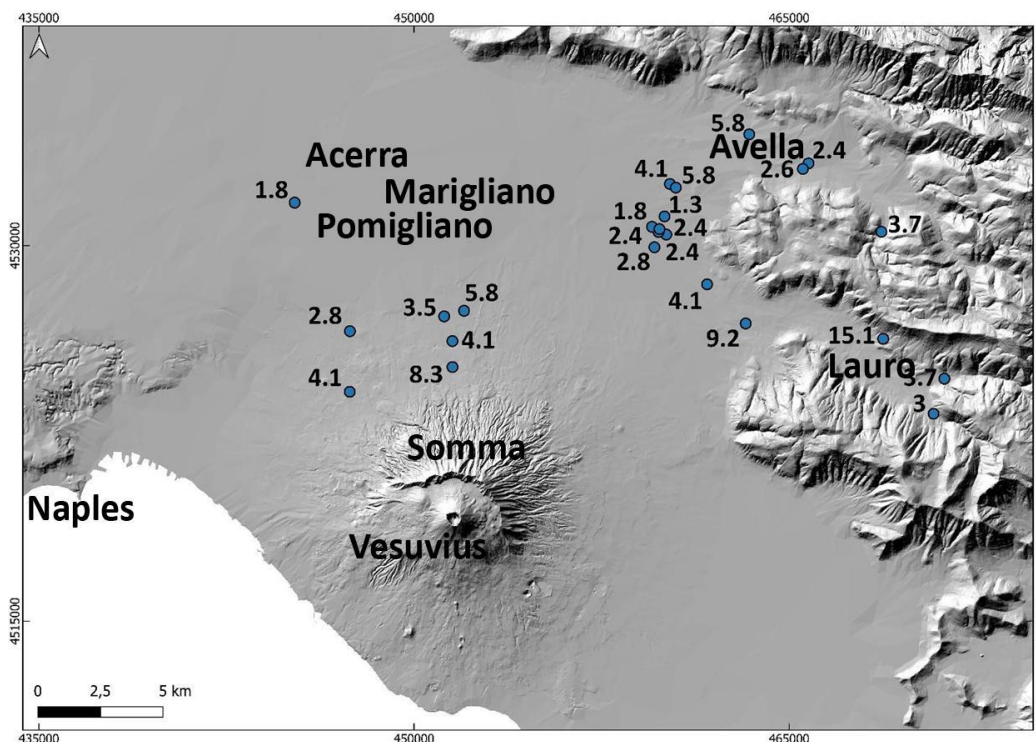

570

571 Fig. 16. Average lahar velocities (in m/s) estimated with a point-by-point reverse engineering approach.

572

573 Then, we used the flow velocities (Fig. 16) to calculate local dynamic pressures of the lahars (Fig.

574 17) as a function of the **clast properties**. The obtained estimations are used by Sandri et al. (submitted)

575 to validate the Probabilistic Hazard Assessment of lahars from Vesuvius eruptions.

576

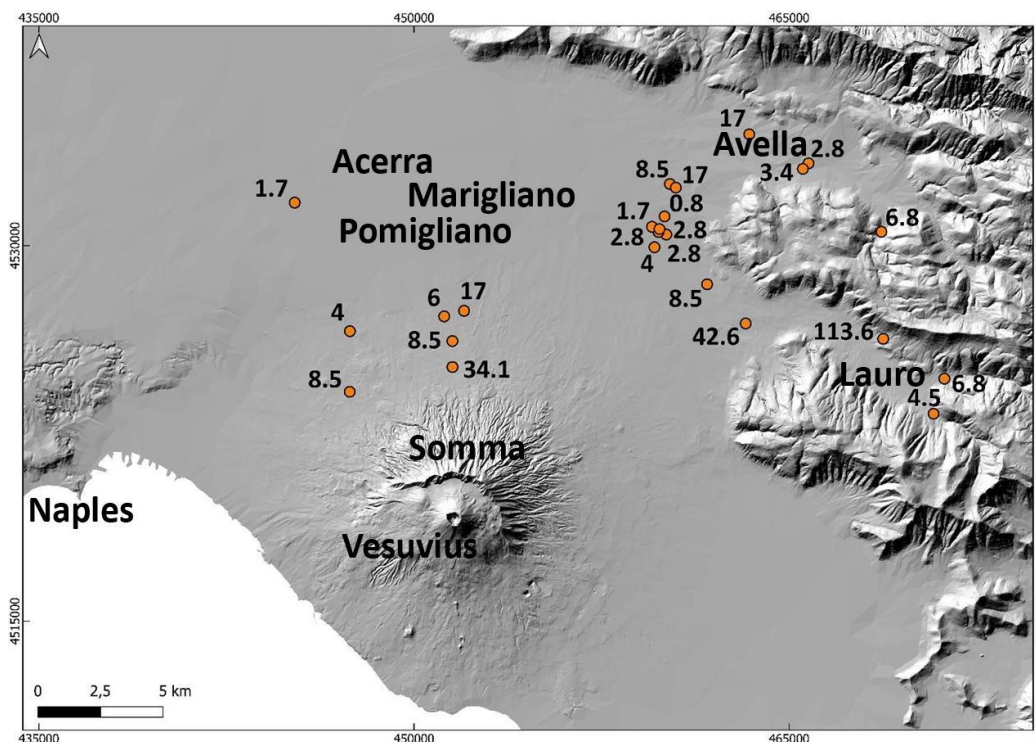

577

578 Fig. 17. Average lahar dynamic pressures (in kPa) estimated with a point-by-point reverse engineering approach.

579

580 The data presented in Figs. 16 and 17 represent **respectively** minimum local values of the flow  
581 velocity and dynamic pressure, useful to assess some minimum impact of the lahars in the alluvial  
582 plain. In particular, we did a parametric test to quantify the sensitivity for different physical states of  
583 the multiphase flow, considering two end members, from a **non-fluidized case to an initially fluidized**  
584 **and non-expanded** case (see Appendix 1). From the performed analysis (see Appendix 1) we found  
585 that the most typical values are referred to the initially fluidized and **slightly expanded** case, with  
586 most of the points falling in the range of velocity of 2-4 m/s, and dynamic pressure of 4-8 kPa.  
587 Lastly, in eight **points** we found the **lahar deposits against** meter-sized obstacles, from which we  
588 estimated, by comparison, local flow heights of the order of 1-1.5 m, and particle volumetric  
589 concentrations of ~30% or more, i.e. the deposit thickness is ~1/3 of the lahar thickness. On the other  
590 hand, it is reasonable to argue that these are local values, and that flow height, particle concentration,



591 and deposit thickness significantly varied over space due to the multiphase nature of the lahars (see  
592 de' Michieli Vitturi et al., submitted; Sandri et al., submitted).

593

## 594 5. Discussion

595 The historical sources used as benchmark for ~~the problem of the~~ lahars around Somma-Vesuvius and  
596 in the Apennine valleys remark the frequent and broad impact that explosive eruptions of Vesuvius  
597 had in historical times. Some of the eruptions ~~occurred~~ in the last four centuries (e.g., 1631, 1822,  
598 1906 and 1944) ~~reached~~ contemporaneously and repeatedly over time a number of municipalities ~~due~~  
599 ~~to the explosive character of the events~~, particularly in the sub-Plinian eruption of 1631. Heavy rain  
600 events caused remobilization of the primary deposits, triggering multiple lahars during or  
601 immediately after the eruption up to a few years (syn-eruptive lahars).

602 On the other hand, the 472 Pollena eruption had an even wider impact, both in terms of primary  
603 pyroclastic deposition and secondary (lahar) impact. For this event the sources are scarce or absent.

604 The analysis of – and realization of a database with – more than 500 stratigraphic sections were done,  
605 which also includes the sedimentological features both of primary (fall, flows) and secondary (lahars,  
606 alluvial events) deposits relative to the two sub-Plinian eruption case studies from Vesuvius, Pollena  
607 and 1631. The detailed reconstruction and mapping of these deposits allow an updating of the  
608 pyroclasts distribution ~~on the territory~~, as both the eruptions had an impact larger than previously  
609 known. In particular, the stratigraphic and sedimentological reconstruction of the deposits was done  
610 not only in open spaces but also close to urban areas, and this is important in terms of local impact of  
611 the lahars vs. broad impact in the environment. Specifically, such impact investigation was done in  
612 urban areas including archaeological findings (e.g., villages, structures, walls, etc).

613 These findings include not only new data from the Somma-Vesuvius plain but also more distal  
614 deposits from Lauro Valley and Avella-Baiano Valley (Apennines), which were subjected to heavy  
615 remobilization also of the finer primary deposits as for the presence of fine ash deposits present in

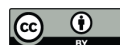

616 both proximal and distal areas. Indeed, the accumulation areas that were reconstructed reveal an  
617 enlargement and extra 20% coverage that was not previously known and, considering the **physical**  
618 **characteristics of the ash**, it should be considered in any hazard and impact evaluation. The full  
619 database thus allows a more precise reconstruction of the new isopachs, both for the Pollena and 1631  
620 eruptions, which is possible given the high number of data points.

621 With particular reference to the lahar deposits, the syn-eruptive ones that were emplaced by relatively  
622 short-term (during or immediately after the eruption) events **stand** directly on the primary pyroclastic  
623 deposits both for Pollena and 1631 eruptions case-studies. **Also, there are not any erosion surfaces**  
624 **due to prolonged exposure of the primary, testifying that the secondary emplacement was quite**  
625 **immediate (max a few years) after or even during the eruption.** The syn-eruptive features of these  
626 deposits are also testified by the absence of anthropic traces or humified surfaces within the deposits,  
627 as further evidence of a very short-term time span between the eruptions and the lahar events. Other  
628 interesting features are the presence of multiple depositional flow units evidenced by clast alignments  
629 and concave erosion surface inside the lahar deposits. Such flow units were emplaced by **en-masse**  
630 **deposition** (with reference to each flow pulse), and this can be argued by the generally **massive facies**  
631 **of each flow unit in the deposits, and by the presence of water escape structures that cross vertically**  
632 **the entire lahar sequences.** This latter evidence testifies a rapid and contemporaneous water loss  
633 through **vertical escaping “pipes” soon** after the emplacement of the sequence.

634 The analysis of the Pollena lithofacies allowed the identification of mainly two deposit categories.  
635 The first one occurs over an area that extends for more than 10 km north of Mount Somma, the second  
636 one occurs on an area which extends west of the Apennines. For the latter, we can recognize two  
637 significant sub-categories of deposits, corresponding to the main valleys in northwest-southeast  
638 direction, Avella-Baiano Valley and Lauro Valley. This difference seems to reflect the type of  
639 primary deposits that was remobilized **and** (just fine ash vs. ash and lapilli). In the first area, which  
640 comprises the municipalities of Acerra and Afragola, **the primary lapilli fallout deposit is in fact not**



641 deposited, while there is almost always a very thin level of phreatomagmatic ash in the Plain and  
642 thick, fine-grained pyroclastic current deposits in the Mt. Somma valleys feeding the lahars. The other  
643 basin comprises many municipalities in the area around Nola (Fig. 1 and Appendix 3), where the  
644 lahar deposits are generally coarser, and consist of multiple depositional units with different  
645 lithofacies. In this case both granulometry and componentry indicate the deposit resulted from the  
646 remobilization of the fallout deposit. A volume estimation of the remobilized syn-eruptive deposits,  
647 based on a GIS calculation, is of  $73 \times 10^6 \text{ m}^3$  for the northern Vesuvius area and  $42 \times 10^6 \text{ m}^3$  for the  
648 Lauro Valley.

649 Referring to the 1631 eruption, previous maps have shown the distribution of the 1631 lahar deposits  
650 toward east, basically following the distribution of the primary pyroclastic fall deposits (Sulpizio et  
651 al., 2006), while in Figs. 9 and 10 we show a significantly larger distribution area particularly toward  
652 north (Somma-Vesuvius ramps and Plain) and east (mountain valleys), and less toward the SE. In  
653 particular, this distribution is well explained by the wide distribution of the ash fallout deposit toward  
654 both north and northeast (Fig. 6), remobilized during the lahar generation along both Somma and  
655 Apennine slopes. On the other hand, looking at the deposit thicknesses, they reach on average half a  
656 meter to the N and NE, while reaching a couple of meters in some points to the NE (aligned with the  
657 dispersion axis of the primary fallout deposits and out of the Apennine valleys).

658 The sedimentological analyses carried out on a number of samples from the different studied sectors  
659 (Somma-Vesuvius, Lauro Valley, Avella-Baiano Valley) are useful for discriminating the various  
660 factors that contributed to emplace the lahar deposits. The samples for Lauro Valley and Avella-  
661 Baiano Valley are coarser (but have a significant finer tail) than the ones for Somma-Vesuvius, and  
662 this can depend on three factors: i) depositional mechanisms of the primary pyroclastic deposits (fall  
663 vs. flow); ii) interaction between lahars and morphology (valley vs. plain); iii) major involvement for  
664 Lauro Valley and Avella-Baiano Valley of the distal fine phreatomagmatic ash deposits formed in  
665 the final eruptions stages. In other words, the primary grain sizes involved in the remobilization (finer



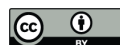

666 and higher-water retention for Somma-Vesuvius), as well as the general topography (gentler but  
667 longer ramp for Somma-Vesuvius) likely acted as the main factors directly impacting the distribution  
668 of the lahar deposits, and the decay of the flow velocities and dynamic pressures in the area.  
669 Interestingly, an emplacement temperature (~120 °C) of the lahar deposits was calculated for those  
670 generated along the Somma-Vesuvius slopes, indicating a relatively hot provenance after  
671 remobilization of the pyroclastic current deposits. Instead, the remobilization from the Apennines  
672 sectors involved only cold fallout deposits. The paleomagnetic data of flow direction also indicate  
673 that the lahar emplacement at Nola and Acerra was not synchronous, as further evidence of the  
674 different timing and detachment areas involved during the pyroclasts remobilization. The parental  
675 lahars acted as mass flows capable of entraining outsized clasts (where available) from substrate  
676 under the action of flow dynamic pressure, then emplaced massive flow units with uplifted external  
677 clasts set into the much finer matrix. In various lahar units, multiple clasts have been found, showing  
678 some alignment that depends on the mechanisms of entrainment and uplift (with respect to substrate)  
679 within the flow.

680 In terms of local impact in the Pollena case study (the largest one), while most of the calculated points  
681 (44) fall in the range of lahar velocity of 2-4 m/s and dynamic pressure of 4-8 kPa, a few peak values  
682 of velocity of 13-15 m/s and dynamic pressure of 90-115 kPa are also calculated, which are directly  
683 related to meter-sized clasts entrained into the lahars on the steep slopes, then deposited downstream  
684 of alluvial fans. Such values of the velocity and dynamic pressure are well comparable with those  
685 calculated for lahars that occurred recently at Ruapehu in 2007 (Lube et al., 2012) and Merapi in 2011  
686 (Jenkins et al., 2015), and in historical times at El Misti (Thouret et al., 2022). In particular, the  
687 estimated velocities and pressure agree with those of Lube et al. (2012) and Jenkins et al. (2015).  
688 Moreover, multiplying velocity and density gives a power per unit surface, so those most  
689 representative values correspond to a flow power per unit surface of  $8 \cdot 10^3 - 3.2 \cdot 10^4 \text{ W/m}^2$ , with peak  
690 values of  $1.17 \cdot 10^6 - 1.72 \cdot 10^6 \text{ W/m}^2$ , in agreement with typical values reported for floods and  
691 megafloods (Russell and Knudsen, 1999; Whipple et al., 2000; Carling, 2013).



692

## 693 **6. Conclusions**

694 **A number of points can be highlighted after the** integration of the historical, stratigraphic,  
695 sedimentological, laboratory, and impact parameter analyses carried out in the Vesuvius area for the  
696 Pollena and 1631 eruptions. In general, the physical characteristics of the analyzed deposits indicate  
697 that syn-eruptive lahars are related to the rapid remobilization of large volumes of pyroclastic  
698 material, which is mainly fine-grained and almost exclusively derived from the accumulation of  
699 products related to a single eruption. The analysis also shows that tardive (post-eruptive) mass flows  
700 are common, and involve multiple and variably altered deposits, and that their energy and frequency  
701 are progressively lower over time, after the last eruption has occurred. In particular, a higher impact  
702 both from primary and secondary phenomena is something that should be accounted in the Vesuvius  
703 area and that,

- 704 i) The new isopach maps of the Pollena and 1631 eruptions allow us to infer a larger impact  
705 than previously known for these two sub-Plinian events of ~~the~~ Vesuvius. Thus, it is worth  
706 reconsidering the territorial impact that sub-Plinian eruptions can have in the Vesuvius  
707 (but not only) area. In particular, the ash deposits can have a high impact in relation to  
708 their high density and low permeability.
- 709 ii) The primary impact from fallout and pyroclastic current processes in the Vesuvius area  
710 was - and may be in the future – followed by the secondary impact from lahars generated  
711 during or immediately after the eruption events. Both impacts can have a wide distribution,  
712 because they are directly controlled by the primary deposits distributions, both around  
713 Somma-Vesuvius and in the Apennines valleys.
- 714 iii) The runouts of such lahars were significant both for the Pollena and 1631 eruptions, by  
715 reaching distances of 10 to 15 km from the sources, and their deposits geometry is tabular-  
716 like with average thicknesses of 0.5 to 1 m.



717 iv) The paleotemperature data highlight a relatively hot dynamics (~120 °C) for those lahar  
718 flow pulses that traveled along the Somma-Vesuvius slopes because of pyroclastic current  
719 deposit remobilization. This did not occur from the Apennines sectors, where only cold  
720 fallout deposits were remobilized.

721 v) A reverse engineering approach allowed to calculate the local lahar velocities (2-4 m/s,  
722 with peaks of 13-15 m/s), dynamic pressures (4-8 kPa, with peaks of 90-115 kPa), and  
723 solid volumetric concentration (~30%, implying a 1:3 ratio between deposit and flow  
724 thickness), on the basis of the external clast properties entrained into the flows then  
725 emplaced into the ash matrix, and on the presence of the lahar deposits in proximity of  
726 obstacles and archaeological findings.

727 As a general conclusion, we have demonstrated that the areal impact of both primary deposits and  
728 lahars, in case of sub-Plinian events at Somma-Vesuvius, involves a territory wider than  
729 previously known and for several years, with possible decreasing damages over time.

730

### 731 **Appendix A. Calculation of lahar velocities and dynamic pressures**

732 A theoretical scheme is presented to quantify local dynamic pressures of the lahars, by inverting the  
733 field features at selected locations. The final goal is to map the values of dynamic pressure to assessing  
734 the hazard from lahars in the study area. Flow dynamic pressure,  $P_{dyn}$ , results from a combination of  
735 flow density,  $\rho_f$ , and flow velocity,  $v$ , and is defined as follows

$$736 \quad P_{dyn} = 0.5\rho_f v^2 \quad (A1)$$

737 In the study area, the original flow was a multiphase flow of water + pyroclastic sediment, which  
738 during remobilization evolved into a flow of water + pyroclastic sediment + external clasts.  
739 Generically, flow density results from a combination of particle density,  $\rho_p$ , and water density,  $\rho_w$ ,  
740 through particle volume concentration,  $C$ , and is defined as follows



741  $\rho_f = \rho_p C + \rho_w (1 - C)$  (A2)

742 In order to define flow velocity, we take into account stratigraphic and sedimentological  
743 characteristics of the lahar deposits: i) they are ubiquitously massive, and result from remobilization  
744 of the primary pyroclastic deposits then emplacement from mass flows; ii) they contain big external  
745 clasts entrained and uplifted from substrate into the flows. With these field characteristics, flow  
746 velocity can be expressed as a combination of entrained clast properties and flow density, and is  
747 defined as follows (modified after Roche, 2015)

748 
$$v = \sqrt{\frac{X\psi(\rho_c - \rho_w)g}{\gamma\rho_f}}$$
 (A3)

749 where  $X$  is clast small axis,  $\psi$  is clast shape factor,  $\rho_c$  is clast density,  $g$  is gravity acceleration and  $\gamma$   
750 is an empirical constant. Eq. 3 allows quantifying the incipient motion of the big clasts, and gives  
751 minimum values of flow velocity required to entrain and uplift the clasts from substrate, possibly  
752 more than once, before being emplaced into the lahar deposits. Such equation has been originally  
753 derived in laboratory experiments for a multiphase flow of air + sediment, and is highly performing  
754 at  $\rho_f \sim 1000 \text{ kg/m}^3$  (hindered settling) for dense pyroclastic currents controlled by topography then  
755 opened to alluvial plain (Martí et al., 2019), which is a case similar to the lahars in the study area.  
756 Substituting Eq. 3 into Eq. 1 and simplifying gives

757 
$$P_{dyn} = 0.5 \frac{X\psi(\rho_c - \rho_w)g}{\gamma}$$
 (A4)

758 For given clast properties, flow dynamic pressure has a unique value, while flow velocity is a function  
759 of flow density. Indeed, the present scheme is a spot model that basically depends on, and is limited  
760 to, the finding of big clasts and boulders within the lahar deposits.

761 At the selected locations in the study area, we collected the dimensions of the biggest clasts found in  
762 the lahar deposits, and we characterized petrographically the clasts in the field, to calculate flow  
763 dynamic pressures using Eq. 4. We used the following values for the various parameters in the



764 calculations:  $\Psi$  (ellipsoid) = 0.66;  $\rho_c$  (limestone) = 2500 kg/m<sup>3</sup>;  $\rho_c$  (ceramic) = 2000 kg/m<sup>3</sup>;  $\rho_c$  (brick)  
765 = 2000 kg/m<sup>3</sup>;  $\rho_c$  (tephra) = 1500 kg/m<sup>3</sup>;  $\rho_c$  (lava) = 2500 kg/m<sup>3</sup>;  $\rho_c$  (iron) = 8000 kg/m<sup>3</sup>;  $\rho_w$  = 1000  
766 kg/m<sup>3</sup>;  $g$  = 9.81 m/s<sup>2</sup>;  $\gamma$  = 0.031 – 0.071. Also, we calculated flow velocities using Eq. 3, in the  
767 following range of flow density:  $\rho_w \leq \rho_f \leq \rho_p$ , where  $\rho_w$  = 1000 kg/m<sup>3</sup> and  $\rho_p$  = 2000 kg/m<sup>3</sup>. In this  
768 way, flow density spans from two extreme cases: i)  $\rho_f = \rho_w$ , negligible pyroclastic sediment and  
769 external clasts, so water flow only; ii)  $\rho_f = \rho_p$ , negligible water and dominant pyroclastic sediment, so  
770 ash flow only. For the empirical constant in Eq. 3, we used three different values to test the sensitivity  
771 with respect to different physical states of the multiphase flow:  $\gamma$  (non-fluidized) = 0.031;  $\gamma$  (initially  
772 fluidized and slightly expanded) = 0.057;  $\gamma$  (initially fluidized and non-expanded) = 0.071 (see Roche  
773 et al., 2013; Fig. A1).

774 Regarding flow velocity, after calculation we can rewrite Eq. 3 in a simpler form (to more directly  
775 relate velocity to density) as follows

$$776 \quad v = \frac{a}{\sqrt{\rho_f}} \quad (\text{A5})$$

777 where  $a > 0$  depends on clast properties, and its square has dimension of pressure. On the other hand,  
778 it is not straightforward to constrain local flow velocities with unique values of flow densities, mostly  
779 because small variations of velocity correspond to large variations of density, and this is particularly  
780 valid for volcanoclastic mass flows (Carling, 2013; Jenkins et al., 2015; Roche, 2015; Martí et al.,  
781 2019; Guzman et al., 2020; Thouret et al., 2022).

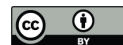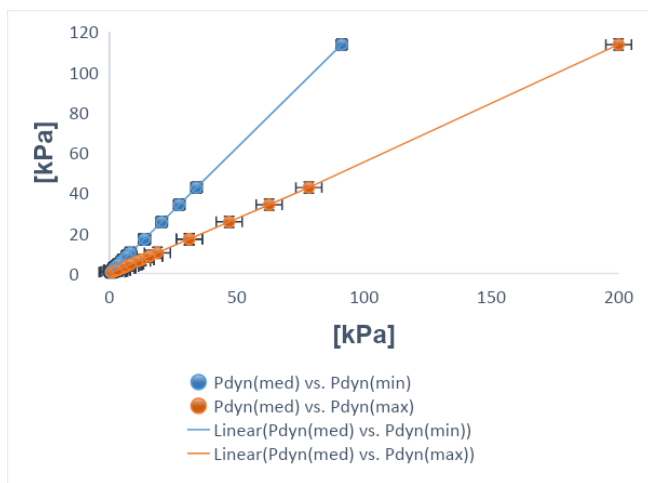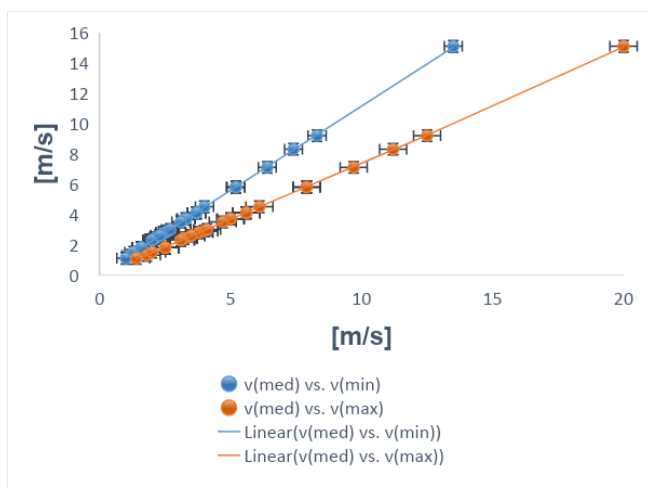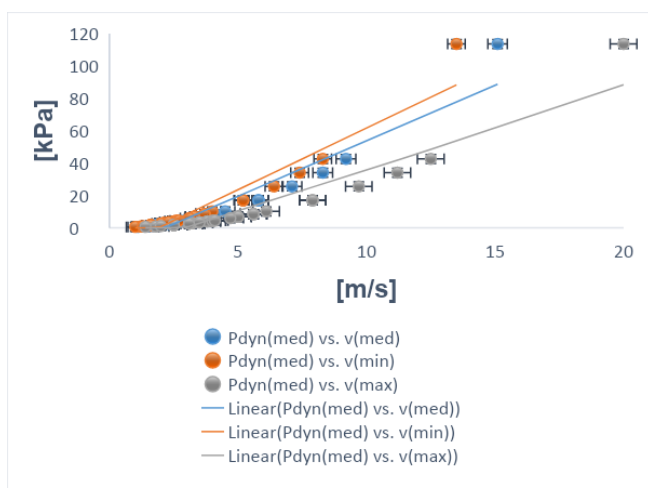



785 Fig. A1. **A**, dynamic pressure for the initially-fluidized and slightly expanded case vs. dynamic pressure for the initially-  
786 fluidized and non-expanded (blue) and non-fluidized (orange) cases; **B**, velocity for the initially-fluidized and slightly  
787 expanded case vs. velocity for the initially-fluidized and non-expanded (blue) and non-fluidized (orange) cases; **C**,  
788 dynamic pressure for the initially-fluidized and slightly expanded case vs. velocity for the initially-fluidized and slightly  
789 expanded (blue), vs. velocity for the initially-fluidized and non-expanded (orange), vs. velocity for the non-fluidized  
790 (grey) cases.

791

792 At some locations in the study area, we found lahar deposits against meter-scale manufacturing  
793 obstacles (Di Vito et al., 2009). The peculiarity is that the deposits in proximity of the obstacles are  
794 thicker than the correlated ones in the free field, but never reach the top of the obstacles themselves.  
795 This means that the lahars were not much expanded, so unable to overcome the obstacles as stratified  
796 flows would have done (cf. Spence et al., 2004; Gurioli et al., 2005; Doronzo, 2013; Breard et al.,  
797 2015). With this field evidence, we can assume that local flow height,  $H$ , was similar to deposit  
798 thickness against the obstacle,  $h_o$ , as follows

$$799 \quad H \approx h_o \quad (A6)$$

800 In order to estimate flow density using Eq. 2, we focus on particle volumetric concentration. For well-  
801 sorted deposits, such concentration can be defined with an average value over flow height as follows  
802 (modified after Doronzo and Dellino, 2013; see also Eq. 30 in de' Michieli Vitturi et al., submitted)

$$803 \quad C = \frac{h_f}{H} \quad (A7)$$

804 where  $h_f$  is deposit thickness in the free field. Substituting Eq. 6 into Eq. 7 gives

$$805 \quad C \approx \frac{h_f}{h_o} \quad (A8)$$

806 In particular,  $h_f$  refers to those lahar deposits relatively close to the obstacles, but which were not  
807 affected by them during emplacement, i.e. close but not so much. We assessed that correlation taking  
808 into account the stratigraphic and sedimentological characteristics of the lahar deposits, and the fact



809 that Eq. 7 performs better with layers emplaced after remobilization of primary pyroclastic fallout or  
810 dominantly ash flow deposits.

811 Lastly, we macroscopically assessed erosion in the field, by characterizing the unconformities present  
812 both on the primary pyroclastic and lahar deposits. In particular, the syn-eruptive lahar deposits  
813 consist of more than one flow unit, so it is important to understand how the different flow pulses  
814 interacted with each other during emplacement. The main unconformities that are found in the field  
815 are referred to the partial absence of a flow unit, and the loss of lateral continuity despite some flat  
816 geometry of the deposits. On the other hand, at some locations we were not able to assess if erosion  
817 occurred or not due to multiple open issues: i) eventual absence of the primary pyroclastic deposits;  
818 ii) eventual exclusive presence of the post-eruptive lahar deposits; iii) impossibility to get to some  
819 outcropping deposit base and eventual unconformities.

820

## 821 **Appendix B. Paleo-temperature and paleo-direction determinations**

822 The magnetic fabric of a deposit was investigated by measurements of the magnetic susceptibility  
823 and its anisotropy (AMS). AMS was measured with a Kappabridge KLY-3 (AGICO), and data were  
824 elaborated by the software Anisoft5 (AGICO). AMS depends on the type, concentration, and  
825 distribution of all the minerals within the specimen. It is geometrically described by a triaxial  
826 ellipsoid, whose axes coincide with the maximum ( $k_1$ ), intermediate ( $k_2$ ) and minimum ( $k_3$ )  
827 susceptibility directions. The magnetic fabric of a specimen is then described by the direction of the  
828  $k_1$  axis, the magnetic lineation (L) and that of the  $k_3$  axis, which is parallel to the pole of the magnetic  
829 foliation plane (F). Besides, the modulus of the susceptibility axes provides some magnetic  
830 parameters useful to express the intensity of the anisotropy ( $P_j$ ) and the oblate/prolate fabric  
831 occurrence (T) (Jelinek, 1981). Generally, sedimentary vs pyroclastic deposits fabric, here considered  
832 as the proxy of the lahar fabric, is oblate with a horizontal to gently imbricated (less than  $20^\circ$ )  
833 magnetic foliation. The magnetic lineation is normally clustered along the foliation plunge. In this





834 case, both the F imbrication and the L direction can provide the local flow direction. Other times, L  
835 is orthogonal to the F plunge or F is statistically horizontal, and it is not possible to infer the flow  
836 direction.

837 For  $T_{\text{dep}}$  estimation, pottery sherds were subjected to progressive thermal demagnetization (PTD),  
838 with heating steps of 40 °C, up to the Curie Temperature ( $T_C$ ), using the Schonstedt furnace and the  
839 spinner magnetometer JR6 (AGICO). The rationale of the method has been described in detail in  
840 several papers (McClelland and Druitt, 1989; Bardot, 2000, Porreca, 2007; Paterson et al., 2010; Lesti  
841 et al., 2011), many of them dedicated to PDCs of the Vesuvian area (Cioni et al., 2004; Di Vito et al.,  
842 2009; Giordano et al., 2018; Zanella et al., 2007; 2018; 2015). Typically, measurements are made on  
843 accidental lava lithics that were entrained during pyroclastic or lahar flows. In this case, we had the  
844 opportunity to estimate the  $T_{\text{dep}}$  by measuring ancient pottery artifacts. Briefly, pottery is  
845 characterized by a thermal remanent magnetization (TRM) acquired during its manufacture and its  
846 subsequent history of daily use. Whenever it is heated, part of its TRM, the one associated with  
847 blocking temperatures ( $T_b$ ) below the heating one ( $T_h$ ), is overwritten. Without alteration phenomena,  
848 the heating/cooling is a reversible process, except for the magnetic directions. The original TRM  
849 shows a random paleomagnetic direction, due to the transport during emplacement. Subsequent  
850 TRMs show directions parallel to the Earth's magnetic field during their cooling. This is clearly  
851 illustrated in the Zijderveld diagrams. The composition of the different magnetization components  
852 reveals thermal intervals characteristic of the heating history of the potsherd. Of course, this  
853 explanation is simplified, but the method is well-established and has been shown to work well with  
854 heated artifacts, such in the case of tiles and pottery embedded in the PDC deposits at Pompeii  
855 (Gurioli et al., 2005; Zanella et al., 2007), Afragola (Di Vito et al., 2009) and Santorini (Tema et al.,  
856 2015). In case of lahar, we expect low  $T_{\text{dep}}$  or cold deposits. This can be a major concern because of  
857 the difficulties to distinguish between the TRM secondary components, and the chemical (CRM) and  
858 viscous (VRM) remanent magnetization. The CRM may develop due to mineralogical changes during  
859 reheating (McClelland, 1996). Instead, VRM is typical of ferromagnetic grains with low  $T_b$  and often



860 occurs in most rocks. Following Bardot and McClelland (2000) relationship for time intervals in the  
861  $10^2$ – $10^6$  year range,  $T_b=75+15 \log$  (acquisition time in years), and using the Pollena eruption date  
862 (472 AD), we obtain a lower limit of the  $T_b$  around 123 °C. This means that this temperature helps us  
863 in discriminating between “hot” ( $T_b > 120$  °C) or “cold” lahar ( $T_b < 120$  °C).

864 Finally, routine magnetic measurements on the lahar matrix were done on the lahar matrix to  
865 determine the Characteristic Remanent Magnetization (ChRM) by Thermal and Alternating Field  
866 demagnetizations. The direction of the Earth’s Magnetic Field during the Pollena eruption is well-  
867 known (Zanella et al., 2008). If the sampled lahars were emplaced shortly after the eruption, both the  
868 secondary TRMs and the matrix of the lahars should show a remanent magnetization direction similar  
869 to the Pollena ones. ChRMs can also test if the two lahars (Acerra and Nola) are coeval.

870

## 871 **Appendix C. Description of the studied areas**

### 872 *Area 1 – Nola*

873 In the area surrounding Nola, it is possible to recognize the complete fallout sequence of the Pollena  
874 eruption (a in fig. C1 and C2), which usually covers ploughed soils (p in fig C1) and late Roman  
875 archaeological remains. The sequence is composed by an alternation of coarse pumice and thin ash  
876 fallout layers. Its top is always made of a cohesive ash bed related to the phreatomagmatic phase of  
877 the eruption (b in fig. C1 and C2), with a thickness ranging from 1 to 14 cm due to erosion. They are  
878 almost always overlain by lahar deposits composed of several flow units (c in fig. C1 and C2) with a  
879 large thickness variability due to channeling and presence of barriers and edifices. They sometimes  
880 include blocks, tiles, and other archaeological remains.

881 In Fig. C1, above the primary deposit, there is an example of a well-exposed sequence composed by  
882 at least five units (c in fig. C1). The first one is a massive and matrix-supported deposit composed by  
883 fine and not vesiculated ash (lithofacies Gms), with fragments of greenish to blackish scoriae and  
884 minor fragments of pumices, lavas and limestones. The fragments are cm-sized and are both angular



885 and rounded. The second flow unit is similar to the one below, but is darker and contains less coarse  
886 fragments. Its matrix is composed by an alternation of fine to medium ash. It follows a plane-parallel  
887 sequence of well-sorted fine sand and silt layers characterized by the lithofacies fM. A massive  
888 deposit follows upward, it is progressively humified and contains abundant reworked and rounded  
889 pumices from the Avellino eruption. The top humified surface is almost always eroded by  
890 anthropogenic activity and is generally ploughed (p1 in Fig. C1), whose surface is overlain by the  
891 primary deposits of the eruption of 1631 (d in Fig. C2). It is few cm thick and is composed by a basal  
892 layer of dark coarse ash (small pumice fragments), overlain by a very cohesive and massive ash bed,  
893 containing abundant accretionary lapilli. The following deposit thickens in the plowing furrows and  
894 depressions, and is composed by massive fine-ash beds, vesiculated and cohesive, and is interpreted  
895 as a lahar deposit (lithofacies mM) (e in Fig. C2). This deposit (e in Fig. C3) overlies the foundations  
896 of Palazzo Orsini (blocks in Fig. C3), now seat of the Court of Nola and built in the second half of  
897 the XV century (Fig. C3). The top is always eroded by the modern anthropogenic activity, and locally  
898 by deposits of recent eruptions of Vesuvius (e.g., 1822, 1906).

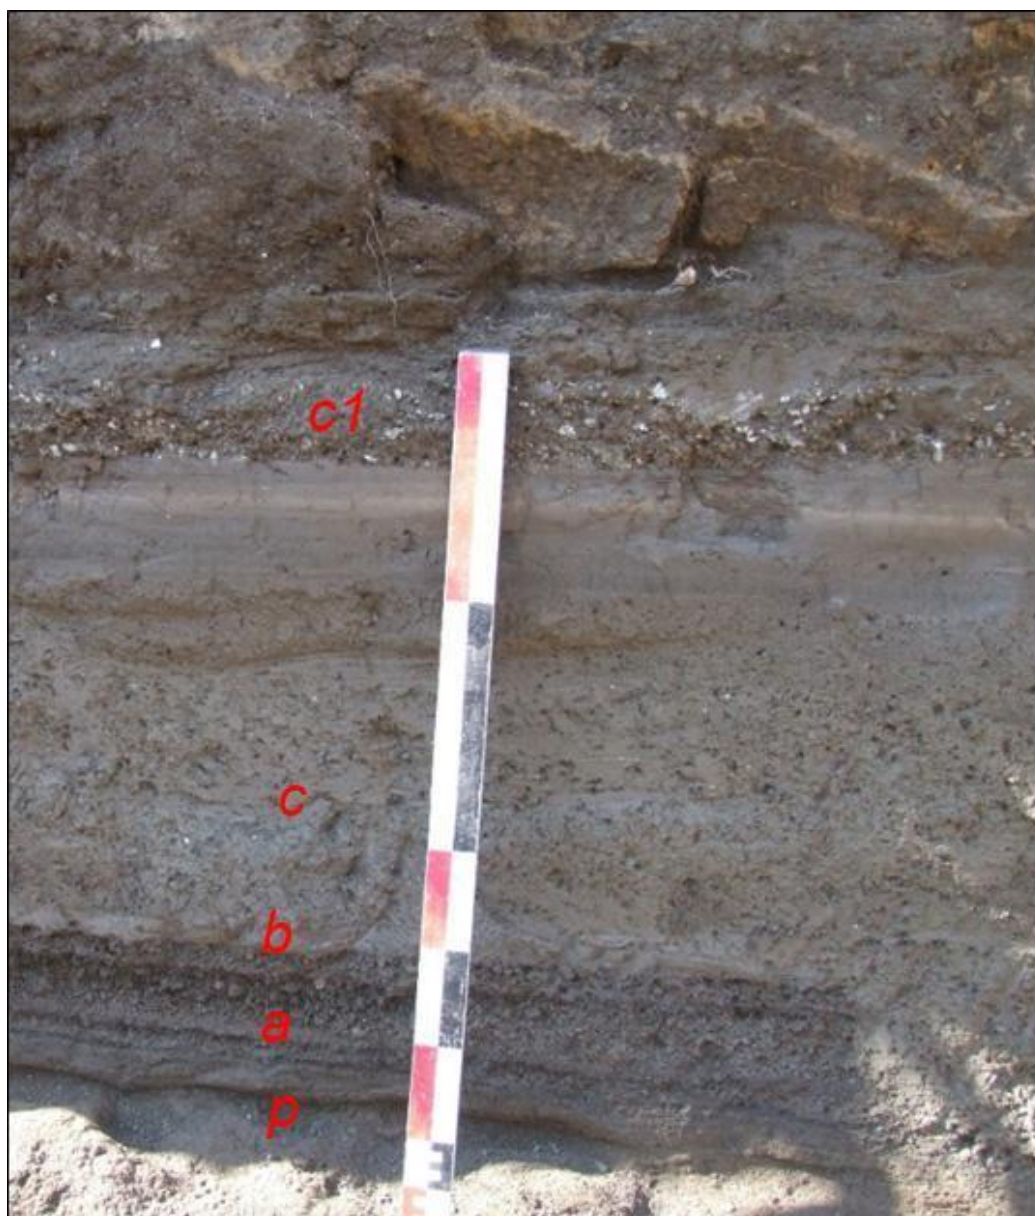

899

900 Fig. C1. Nola, Pollena fallout deposits overlain by at least five lahar units.

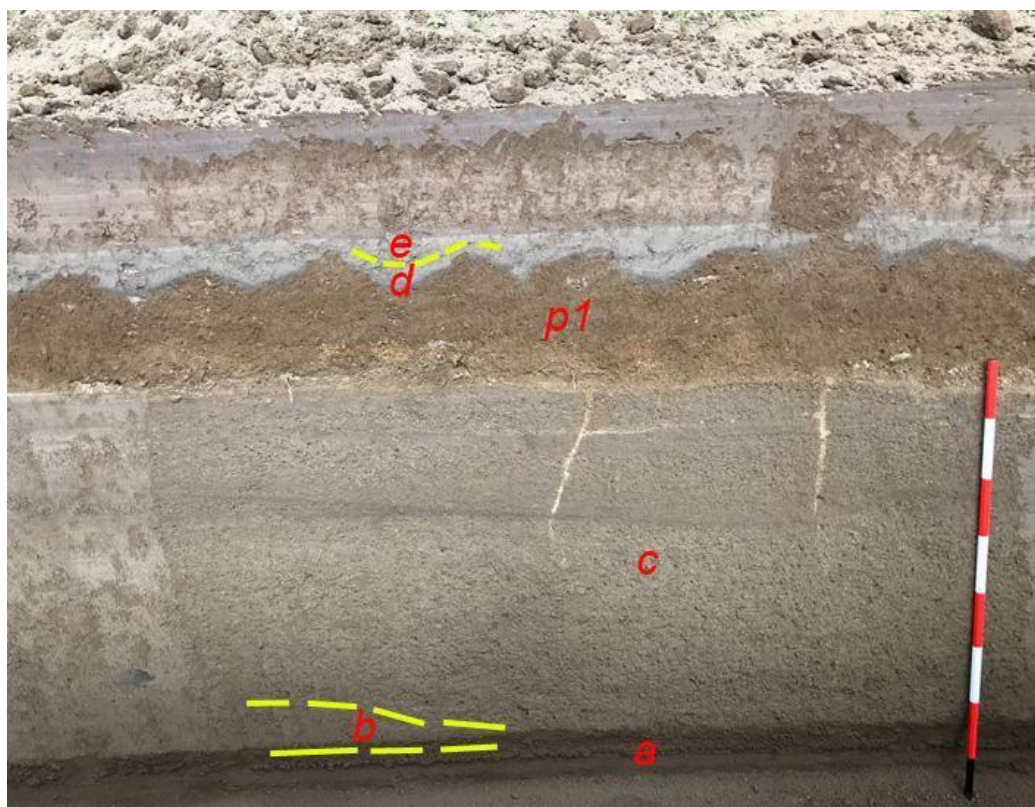

901

902 Fig. C2. Pollena lahar deposits overlain by a cultivated paleosoil and by the 1631 ash fallout and lahars.

903

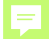

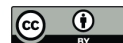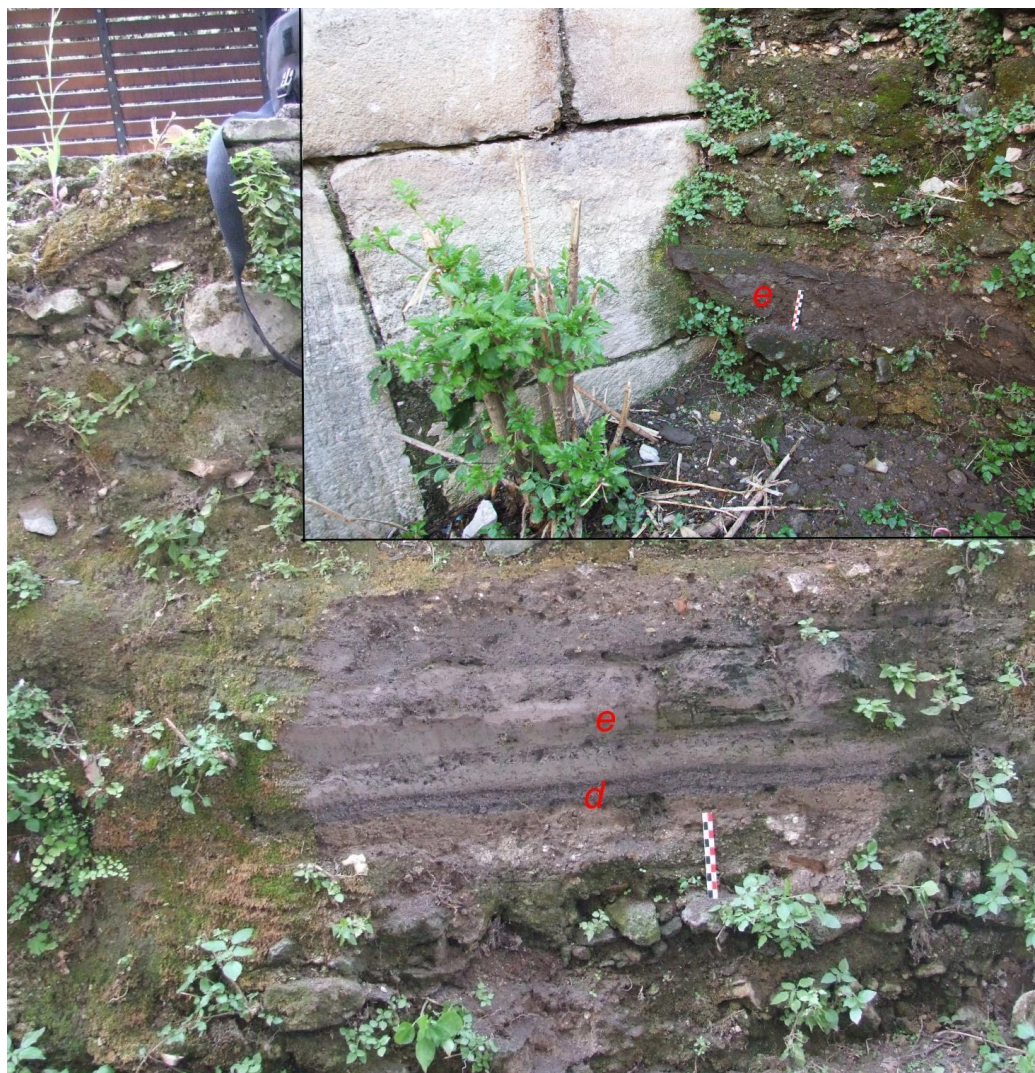

904

905 **Fig. C3. Palazzo Orsini, Nola (1631 fallout and lahars).**

906

907 In Nola and in the nearby Cimitile, the effects on the territory of the lahar emplacement related to the  
908 Pollena eruption are testified by numerous archaeological remains. The Nola and Cimitile areas are  
909 covered by thick sequences of fallout and lahar deposits. In fact, the previous ground level was at  
910 least 2-3 m below the present one. This effect is well visible in the Amphitheater Laterizio, which  
911 was completely filled by the primary and secondary deposits, and the same in Cimitile, where in the



912 archaeological site of the Early Christian basilicas the present ground level is about two meters higher  
913 than the one before the eruption. It is worth noting that in Cimitile the flows were able to carry  
914 limestone blocks of 50 cm in diameter, likely along the main flow direction of the lahars (Fig. C4).

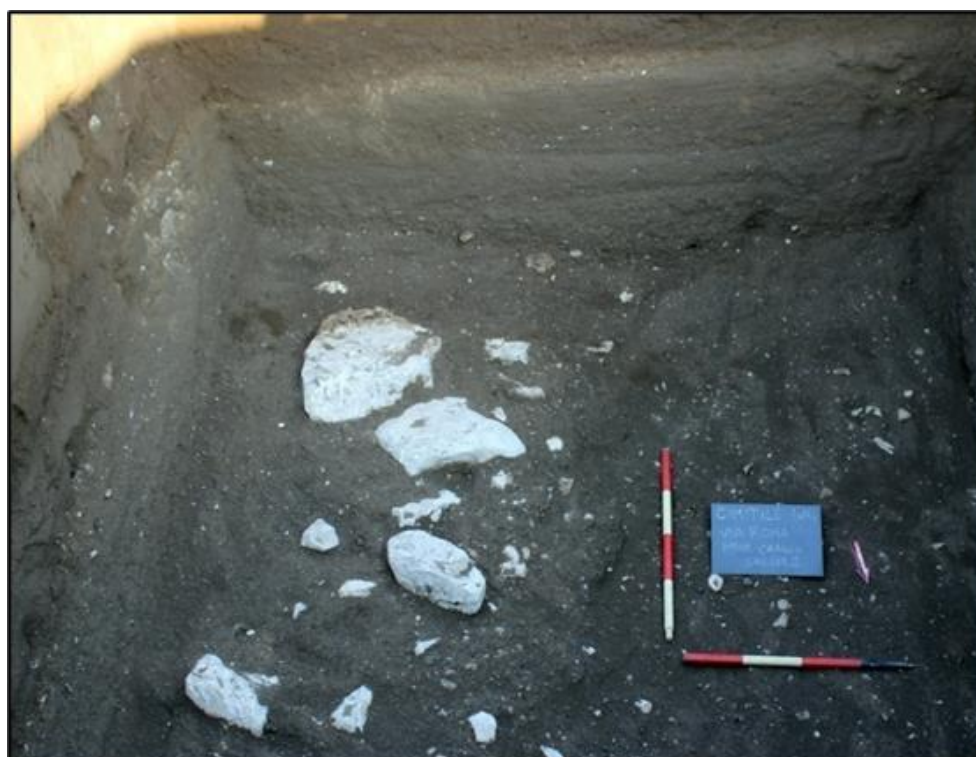

915

916 Fig. C4. Cimitile. Sequence of three m-thick lahar units with evidences transport of calcareous block (up to 50 cm). The  
917 largest are in the lower unit.

918

#### 919 *Area 2 – Acerra-Afragola*

920 The Acerra and Afragola territories are located north and north-west of Vesuvius, and are almost flat  
921 areas crossed by the Clanis river. Both the coarse fallout deposits of the Pollena and 1631 eruptions  
922 are absent in this area. Here, only a thin, centimetric ash bed overlies the Late Roman paleosoil. This  
923 ash bed, which we correlate with the final phreatomagmatic phases of the Pollena eruption, is  
924 homogeneous, cohesive and mantles the ground without any significant lateral variation. The  
925 overlying deposit is characterized by high thickness variations, is generally massive and contains

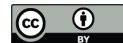

926 vesicles from circular to flattened and coated by fine ash. It has a matrix-supported texture and is  
927 composed of fine to very fine, very cohesive ash, and contains scattered and more or less abundant  
928 pumice and lithic fragments (lithofacies mM) and remains of vegetation (Barone et al., 2023). From  
929 one to three depositional units have been recognized, marked by unconformities, and differences in  
930 grain-size or color. The uppermost unit always contains white pumice fragments of the Avellino  
931 eruption. Very common are drying out structures and water escape structures, which are vertical  
932 structures (Fig. C5), like fractures a few cm large, filled by finer material transported by the escaping  
933 water, formed soon after the emplacement of the syn-eruptive lahars (Fig. C5). The maximum  
934 thickness recorded in this area is about 90 cm.  
935

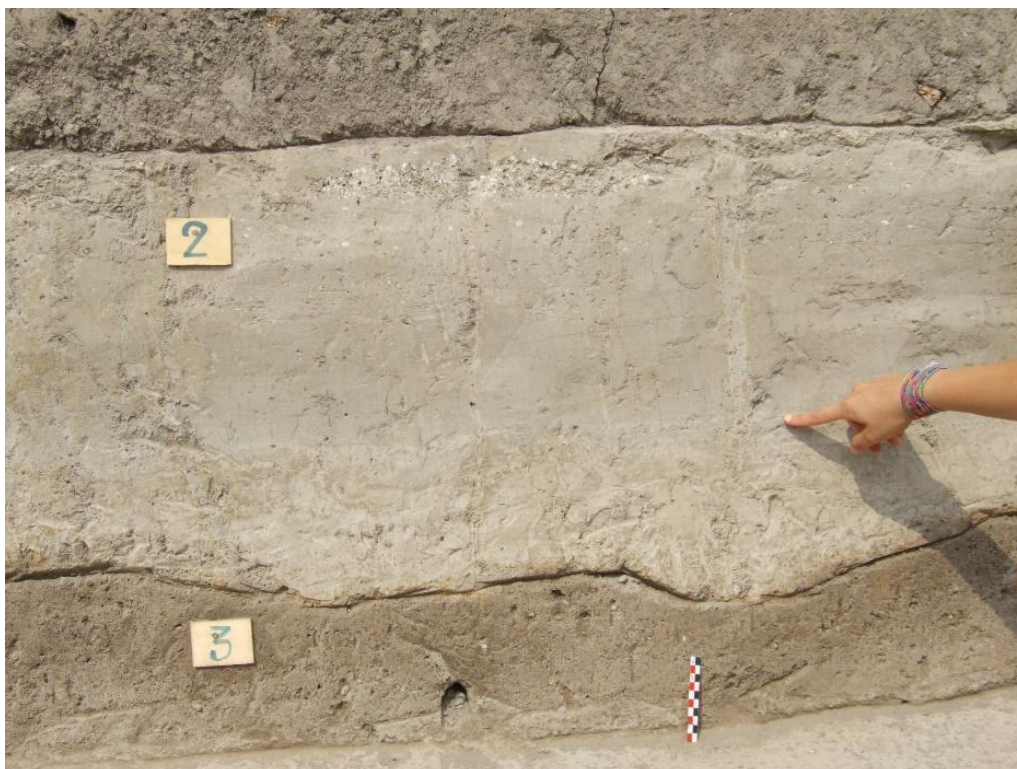

936 Fig. C5. Lahar deposit (unit 2) in Acerra overlaying a cultivated paleosol (unit 3). The index finger indicates a water  
937 escape structure.

938





939 The top is almost always horizontal due to the erosion related to the modern anthropogenic activity,  
940 and only in a few exposures it is capped by a paleosoil, with traces of human presence of the Medieval  
941 times and of the deposits of the 1631 eruption as well. The base of this latter deposit is a cm-thick  
942 fine-ash bed with an internal plane-parallel layering emplaced by fallout. It underlies a massive  
943 deposit with high thickness variations (max 20 cm) at the outcrop scale, is composed by fine ash,  
944 cohesive and vesiculated and contains scattered small pumice fragments (lithofacies mM). The  
945 pumice fragments are vesicular, dark gray to blackish, highly porphyritic with leucite, pyroxene and  
946 feldspar crystals. The stratigraphic position and lithology confirm their attribution to the 1631 primary  
947 and secondary (lahars) deposits.

948

#### 949 *Area 3 – Pomigliano-Marigliano*

950 This area is located along the northern outer part of the Vesuvius apron (Santacroce et al., 2003). The  
951 studied sequences start from the paleosoil developed on top of ash the deposits of the AD 79 eruption.  
952 The paleosoil is mature and contains pottery fragments till the II century AD. Its top is undulated with  
953 traces of ploughing spaced about 50 cm (a in Fig. C6). Representative sequences of the area include  
954 a basal ash layer with a thickness ranging from 1 to 4 cm (b in Fig. C7), thickening in the depressions,  
955 cohesive and locally vesiculated. It is here interpreted as co-ignimbritic ash emplaced by fallout  
956 during the phreatomagmatic final phases of the Pollena eruption. Upwardly, the sequence includes  
957 several lahar units from massive to slightly stratified, composed by fine and very cohesive ash, and  
958 containing scattered greenish pumice fragments (lithofacies mM) (b1 in Fig. C7). Locally this deposit,  
959 also in the case of multiple units, is cut by vertical drying cracks. The sequence is overlain by a 25-  
960 30 cm thick mature paleosoil, containing cultivation traces and majolica fragments (c in Figs. C6 and  
961 C7).

962 The top of this paleosoil is undulated and covered by the primary deposit of the 1631 eruption (d in  
963 Fig. C7). This latter is represented by a discontinuous medium to fine ash layer, slightly laminated  
964 for contrasting grain size, up to 5 cm thick, with a gray to violet color, and containing dark pumice



965 fragments and loose crystals of leucite, pyroxene and biotite (Fig. C7). Its thickness variation is due  
966 both to slight internal variations (thickening in correspondence of depressions) and erosion by the  
967 following lahars. These latter are composed of one to three flow units (d1 in Fig. C7), with a  
968 cumulative total thickness varying from 10 to 45 cm. They are composed of massive fine and very  
969 cohesive ash, and contain rare scattered dark pumice fragments similar to those of the 1631 eruption  
970 (lithofacies mM). These sequences are overlain by recent, cultivated soil. Locally, thin ash beds of  
971 the recent Vesuvius activity (like 1822, 1906) overlie the 1631 deposits.

972

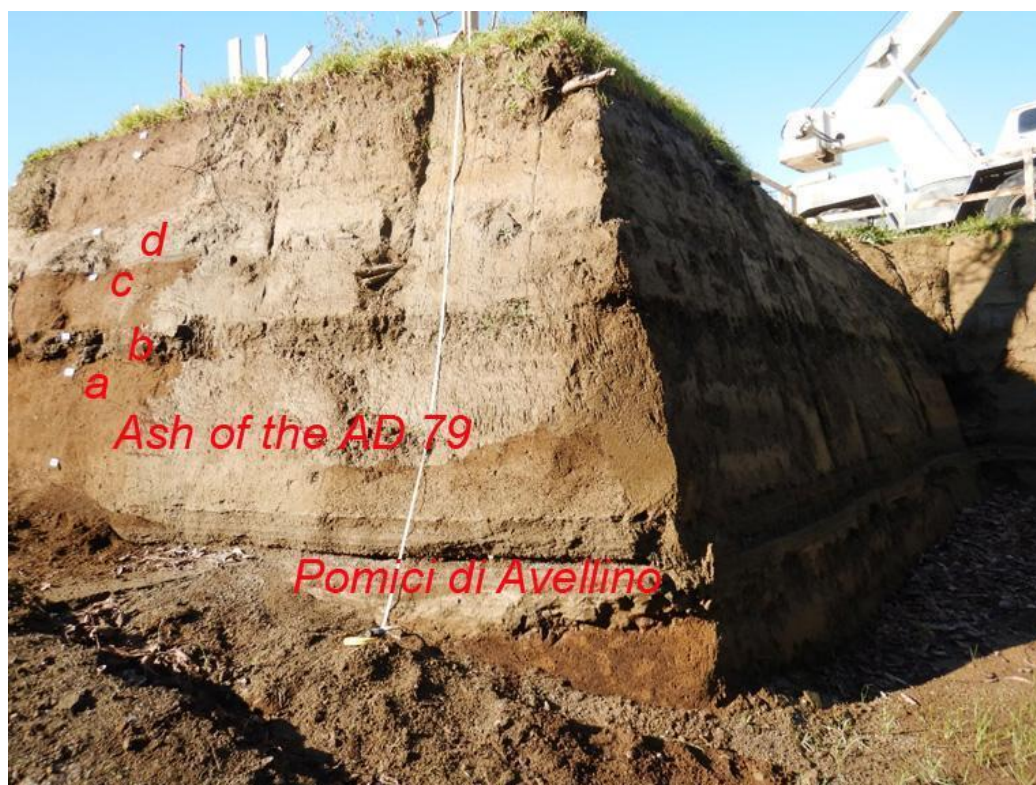

973

974 Fig. C6. Pomigliano locality. Sequence of deposits including bottom to top: Bronze Age paleosol, Pomici di Avellino  
975 (unit EU 5 of Di Vito et al., 2009), paleosol developed on top of Pomici di Avellino and buried by the Pollena eruption  
976 deposits. In the central part, fine ash deposits of the 79 CE eruption are visible. The top of the paleosol is undulated and  
977 ploughed. a,b) primary and secondary deposits of the Pollena eruption, c) paleosol between Pollena and 1631 deposits,  
978 d) 1631 primary and secondary deposits..



979

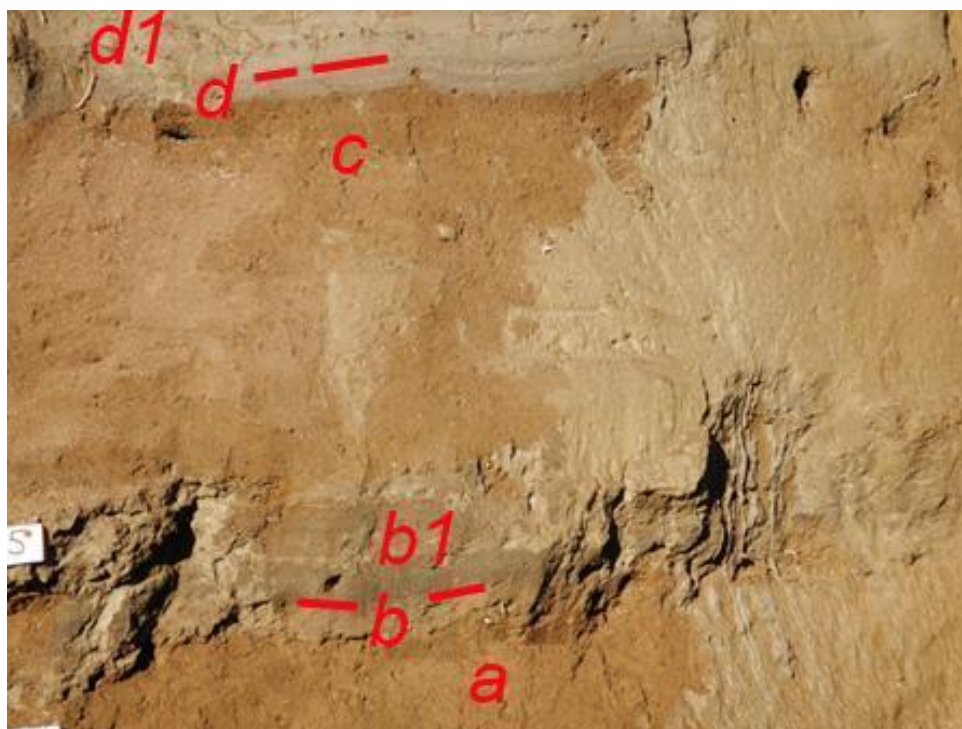

980

981 Fig. C7. Particular of the Fig. C6. a) paleosoil containing potteries of the II Cent. AD; b) ash deposit of the Pollena  
982 eruption; b1) syn-eruptive lahars of the Pollena eruption; c) paleosoil between Pollena and 1631; d) primary deposits of  
983 the 1631 eruption, overlain by syn-eruptive lahars (d1).

984

#### 985 *Area 4 – Avella-Baiano valley*

986 We have analyzed several sequences along the *Avella-Baiano* valley, both exposed and excavated for  
987 the present work. Here the sequences of primary deposits are often affected by deep erosion, in fact,  
988 in some places the Pollena primary deposits are completely lacking and only the syn-eruptive lahar  
989 deposits are present on top of the late Roman paleosoil. Where preserved, the paleosoil has often an  
990 undulated surface due to cultivation (ploughing and hoeing). The Pollena eruption sequence consists  
991 of an alternation of coarse pumice and fine ash layers emplaced by fallout (a in Fig. C8). It is up to  
992 50 cm thick and ends with a cohesive yellowish ash layer (b in Fig. C8), overlain by the lahar deposits,  
993 generally composed by 2-3 flow units (c in Fig. C8). The total thickness of the lahars is largely



994 variable with maxima at the base of the slopes where it can reach 2-3 m. In some excavations we did  
995 not reach the base of the deposit, deeper than 3.5 m. In Fig. C8, it is possible to observe a complete  
996 sequence of deposits of Pollena overlying a late Roman paleosoil. The sequence includes the fallout  
997 layers and thick lahar deposits. These latter are always massive, matrix-supported, and contain  
998 abundant scattered pumice and lithic fragments (lithofacies Gms). In some cases, the lower part  
999 contains several limestone fragments up to 10 cm in diameter. The described deposit has been also  
1000 found in the Roman Amphitheatre of Avella, where it has a variable thickness (order of decimetric).  
1001 Here, it has been almost all excavated and only remnants are presently exposed.  
1002 Generally, the upper part of the sequences is composed by an alternation of plane-parallel to cross-  
1003 layered sands and gravels, with abundant rounded limestone fragments, emplaced by several alluvial  
1004 episodes (post-eruptive) (lithofacies Sh-Ss). In these post-eruptive deposits, it is not uncommon to  
1005 find terracotta fragments from the Imperial Roman age.

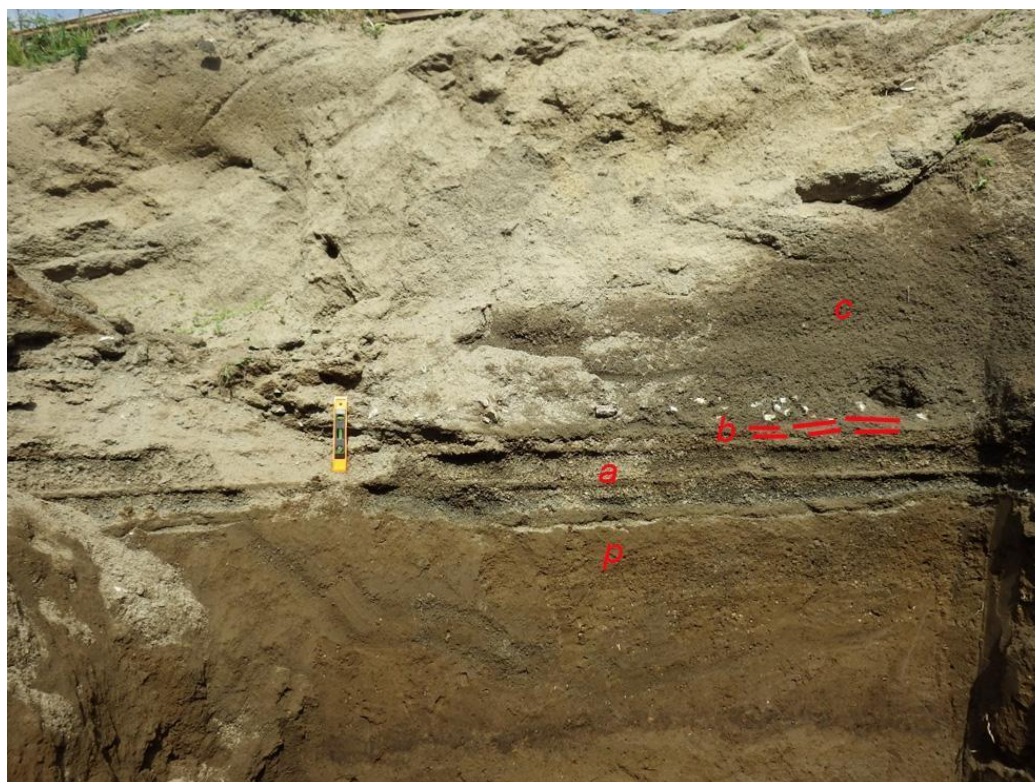

1006



1007 Fig. C8. Avella-Baiano ValleyAvella valley. The Pollena primary deposit (a,b) lies on a ploughed soil (p) and it is covered  
1008 by at least three flow units of lahars.

1009

1010 The Pollena primary and secondary sequences are overlain by a mature paleosoil with frequent  
1011 evidence of cultivation (ploughing, p in Fig. C9) and locally by the 1631 eruption deposits. The  
1012 primary deposit related to the 1631 eruption is not always present. It is up to 2 cm (a in Fig. C9) thick  
1013 ash layer, gray-violet in color deposited by fallout deposit and overlaying a ploughed paleosoil (p in  
1014 Fig. C9). It is overlain by lahar deposits (b in Fig. C9) composed by several units and characterized  
1015 by contrasting grain-sizes. The deposits are composed of medium ash, are massive and matrix-  
1016 supported, and contain abundant scattered mm- to cm-sized pumice fragments (all with the same  
1017 lithology of the primary deposits) and sometimes vegetal remain traces (lithofacies Gms).

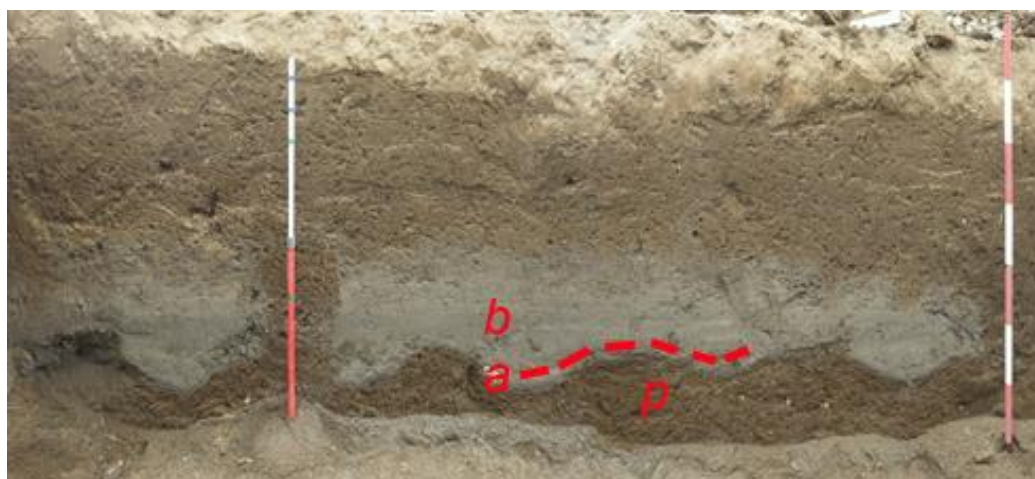

1018

1019 Fig. C9. Avella-Baiano ValleyAvella valley: particular of the 1631 primary (a) and secondary deposits (b, syn-eruptive  
1020 lahars) in a trench at Cicciano locality.

1021

1022 *Area 5 – Lauro ValleyVallo di Lauro*

1023 Lauro ValleyVallo di Lauro has characteristics similar to the Avella-Baiano ValleyAvella valley, but  
1024 the primary deposits of Pollena and 1631 eruptions are thicker (Figs. 5 and 6) and coarser. In this  
1025 valley also the sequences are locally deeply eroded. In fact, the deposits of the Pollena eruption



1026 (normally 50-70 cm thick) (Fig. C10) are sometimes missing. They overlie a mature paleosoil with  
1027 abundant traces of cultivation. Overall, the characteristics of the deposits are very similar to the ones  
1028 of the Nola area. The overlying lahar deposits are always massive, matrix-supported, and composed  
1029 of fine and very cohesive ash with abundant scattered pumices and lithic fragments (similar in  
1030 lithology to those of the primary deposits) (lithofacies Gms). These deposits have a high variable  
1031 thickness, with a measured maximum up to 2 m, but sometimes reduced by erosion. In some trenches  
1032 the base of the sequences was deeper than the investigated depth (>3.5 m).

1033

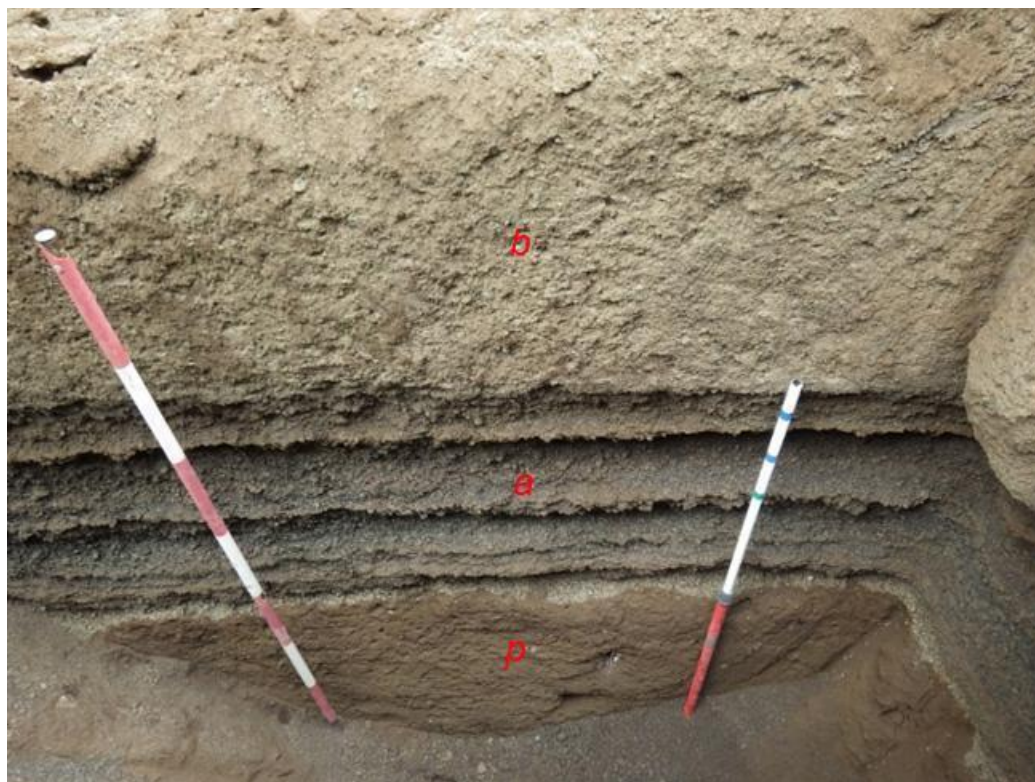

1034

1035 Fig. C10. Lauro valley, Pago del Lauro ValleyVallo di Lauro. Sequence of Pollena fallout deposits (a) overlain by syn-  
1036 eruptive lahars (b). At the base the late Roman paleosoil (p).

1037



1038 It is possible to evaluate the effects of the lahars on building in the Roman Villa di Lauro, at Taurano,  
1039 where a 70 cm thick fallout is overlain, without paleosoil, by syn-eruptive lahars which engulfed and  
1040 transported pieces of walls, bricks and potteries. The lahar deposits are matrix supported and  
1041 composed by fine to coarse ash and contain abundant pumice lapilli (all similar to the Pollena fallout  
1042 deposits). They are massive, cohesive and have a thickness up to about 1 m, thickening in depressions  
1043 and near barriers (Fig. C11).

1044 The sequence related to the eruption of 1631 is not always present, but it is possible to find its primary  
1045 deposit, composed by a basal layer of stratified fine and medium thin ash beds, and minor dark pumice  
1046 and lithic fragments overlain by a thin, very fine and cohesive accretionary lapilli-rich ash bed. The  
1047 maximum measured thickness is 30 cm. The overlying lahar deposits are massive and matrix-  
1048 supported, composed of fine to coarse ash and contain abundant pumice fragments of the primary  
1049 deposit.

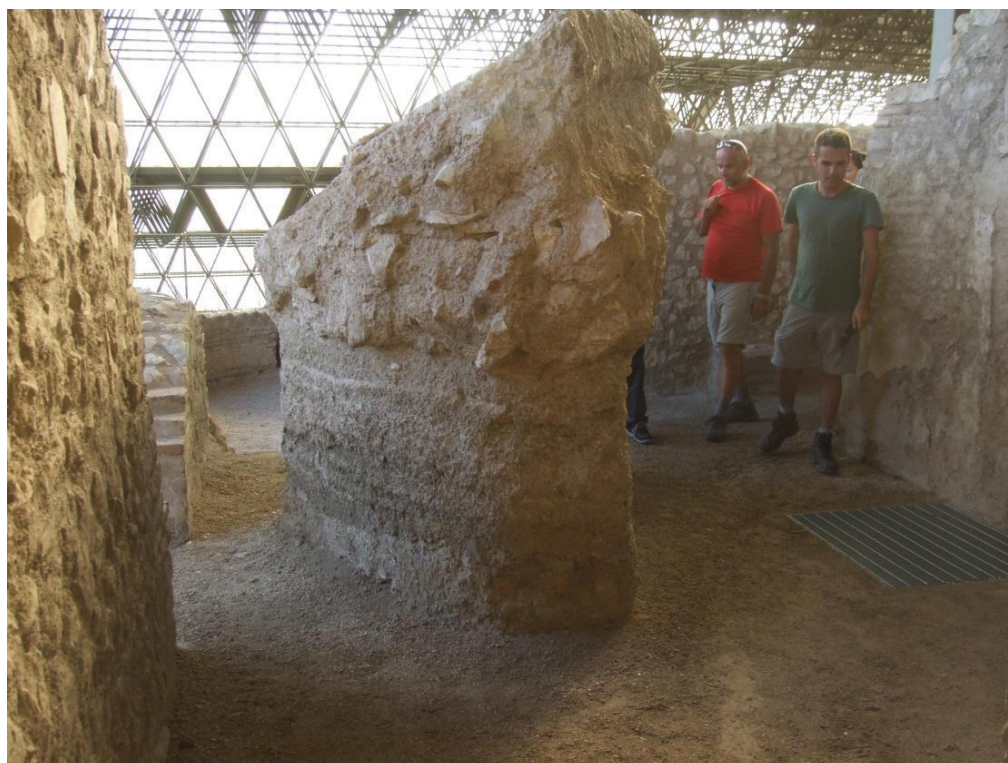

1050



1051 Fig. C11. Taurano (Villa Lauro), **baulk** showing a thick sequence of lahar units filling the Roman Villa. **Some units engulf**  
1052 **and transport pieces of walls and large blocks.**

1053

#### 1054 **Author contribution**

1055 MDV: conceptualization, investigation, methodology, writing - original draft preparation, writing -  
1056 review & editing, funding acquisition; IR: data curation, investigation, writing - original draft  
1057 preparation; SdV: investigation, writing - original draft preparation, writing - review & editing; DMD:  
1058 investigation, methodology, data curation, writing - original draft preparation, writing - review &  
1059 editing; MB: data curation, methodology, writing - original draft preparation; MdmV: writing -  
1060 review & editing; MR: conceptualization, writing - review & editing; LS: writing - review & editing;  
1061 GZ: investigation, writing - review & editing; EZ: investigation, methodology, writing - original draft  
1062 preparation; AC: conceptualization, writing - review & editing, funding acquisition.

1063

#### 1064 **Acknowledgements**

1065 This work benefited of the agreement between Istituto Nazionale di Geofisica e Vulcanologia and the  
1066 Italian Presidenza del Consiglio dei Ministri, Dipartimento della Protezione Civile (DPC),  
1067 Convenzione B2. The paper does not necessarily represent DPC official opinion and policies.

1068

#### 1069 **References**

1070 Acocella V and Funicello R (2006) Transverse systems along the extensional Tyrrhenian margin of  
1071 Central Italy and their influence on volcanism. *Tectonics* 25,1-24.





- 1072 Arguden AT and Rodolfo KS (1990) Sedimentologic and dynamic differences between hot and cold  
1073 laharic debris flows of Mayon Volcano, Philippines. *Geological Society of America Bulletin* 102,  
1074 865-876.
- 1075 Bardot L (2000) Emplacement temperature determinations of proximal pyroclastic deposits on  
1076 Santorini, Greece, and their implications. *Bulletin of Volcanology* 61, 450-467.
- 1077 Bardot L, McClelland E (2000) The reliability of emplacement temperature estimates using  
1078 paleomagnetic methods: a case study from Santorini, Greece. *Geophysical Journal International* 143,  
1079 39-51.
- 1080 Bartole R (1984) Tectonic Structure of the Latian-Campanian Shelf (Tyrrhenian Sea). *Bollettino di*  
1081 *Oceanologia Teorica Applicata* 2, 197-230.
- 1082 Bisson M, Pareschi MT, Zanchetta G, Sulpizio R, Santacroce R (2007) Volcaniclastic debris-flow  
1083 occurrences in the Campania region (Southern Italy) and their relation to Holocene–Late Pleistocene  
1084 pyroclastic fall deposits: implications for large-scale hazard mapping. *Bulletin of Volcanology* 70,  
1085 157-167.
- 1086 Bisson M, Spinetti C, Sulpizio R (2014) Volcaniclastic flow hazard zonation in the Sub-Apennine  
1087 Vesuvian area using GIS and remote sensing. *Geosphere* 10, 1419-1431.
- 1088 Bisson M, Zanchetta G, Sulpizio R, Demi F (2013) A map for volcaniclastic debris flow hazards in  
1089 Apennine areas surrounding the Vesuvius volcano (Italy). *Journal of Maps* 9, 230-238.
- 1090 Blott SJ and Pye K (2001) Gradistat: A Grain Size Distribution and Statistics Package for the Analysis  
1091 of Unconsolidated Sediments. *Earth Surface Processes and Landforms* 26, 1237-1248.
- 1092 Braccini GC (1632) Dell'Incendio Fattosi nel Vesuvio a XVI di Dicembre MDCXXXI. Secondino  
1093 Roncagliolo, 104 pp.



- 1094 Brancaccio L, Cinque A, Romano P, Roskopf C, Russo F, Santangelo N, Santo A (1991)  
1095 Geomorphology and neotectonic evolution of a sector of the Tyrrhenian flank of the Southern  
1096 Apennines (Region of Naples, Italy). *Zeitschrift für Geomorphologie Supplement Bd.* 82, 47-58.
- 1097 Breard ECP, Lube G, Cronin SJ, Valentine GA (2015) Transport and deposition processes of the  
1098 hydrothermal blast of the 6 August 2012 Te Maari eruption, Mt. Tongariro. *Bulletin of Volcanology*  
1099 77, 100.
- 1100 Brocchini D, Principe C, Castradori D, Laurenzi MA, Gorla L (2001) Quaternary evolution of the  
1101 southern sector of the Campanian Plain and early Somma-Vesuvius activity: insights from the Trecase  
1102 1 well. *Mineralogy and Petrology* 73, 67-91.
- 1103 Carling PA (2013) Freshwater megaflood sedimentation: What can we learn about generic processes?  
1104 *Earth-Science Reviews* 125, 87-113.
- 1105 Carrara E, Iacobucci F, Pinna E, Rapolla A (1973) Gravity and magnetic survey of the Campanian  
1106 volcanic area, S. Italy. *Bollettino di Geofisica Teorica e Applicata* 15, 39-51.
- 1107 Cas RAF, Wright HMN, Folkes CB, Lesti C, Porreca M, Giordano G, Viramonte JG (2011) The flow  
1108 dynamics of an extremely large volume pyroclastic flow, the 2.08-Ma Cerro Galán Ignimbrite, NW  
1109 Argentina, and comparison with other flow types. *Bulletin of Volcanology* 73, 1583-1609.
- 1110 Cinque A and Robustelli G (2009) Alluvial and coastal hazards caused by long-range effects of  
1111 Plinian eruptions: The case of the Lattari Mts. After the AD 79 eruption of Vesuvius. *Geological*  
1112 *Society London Special Publications* 322, 155-171.
- 1113 Cioni R, Gurioli L, Lanza R, Zanella, E (2004) Temperatures of A.D. 79 pyroclastic density current  
1114 deposits (Vesuvius, Italy). *Journal of Geophysical Research* 109, B02207.
- 1115 Costa JE (1997) Hydraulic modeling for lahar hazards at Cascades volcanoes. *Environmental*  
1116 *Engineering Geoscience* 3, 21-30.



- 1117 D'Argenio B, Pescatore TS, Scandone P (1973) Schema geologico dell'Appennino meridionale  
1118 (Campania e Lucania). In: *Moderne vedute sulla geologia dell'Appennino*. Convegno (Roma, 16-18  
1119 Febbraio 1972). Accademia Nazionale dei Lincei, *Problemi Attuali di Scienza e Cultura, Quaderni*  
1120 183, 49-72.
- 1121 de' Michieli Vitturi M, Costa A, Di Vito MA, Sandri L, Doronzo DM (submitted). Lahar events in  
1122 the last 2,000 years from Vesuvius eruptions. Part 2: Formulation and validation of a computational  
1123 model based on a shallow layer approach.
- 1124 De Simone GF, Perrotta A, Scarpati C (2011) L'eruzione del 472 d.C. ed il suo impatto su alcuni siti  
1125 alle falde del Vesuvio. *Rivista Studi Pompeiani* 22, 61.71.
- 1126 De Vivo B, Rolandi G, Gans PB, Calvert A, Bohrson WA, Spera FJ, Belkin HE (2001) New  
1127 constraints on the pyroclastic eruptive history of the Campanian volcanic Plain (Italy). *Mineralogy*  
1128 *and Petrology* 73, 47-65.
- 1129 Di Crescenzo G and Santo A (2005) Nuovo contributo sul ruolo svolto dai livelli pomicei nelle aree  
1130 di distacco delle frane di colata rapida dei massicci carbonatici campani. Convegno Nazionale La  
1131 mitigazione del rischio da colate di fango a Sarno e negli altri Comuni colpiti dagli eventi del maggio  
1132 1998. Napoli, 2 e 3 maggio 2005 - Sarno 4 e 5 maggio 2005.
- 1133 Di Vito MA, Castaldo N, de Vita S, Bishop J, Vecchio G (2013) Human colonization and volcanic  
1134 activity in the eastern Campania Plain (Italy) between the Eneolithic and Late Roman periods.  
1135 *Quaternary International* 303, 132-141.
- 1136 Di Vito MA, Sulpizio R., Zanchetta G (1998). I depositi ghiaiosi della valle dei torrenti Clanio e  
1137 Acqualonga (Campania centro-orientale): significato stratigrafico e ricostruzione paleoambientale. *Il*  
1138 *Quaternario Italian Journal of Quaternary Sciences* 11, 273-286.
- 1139 Di Vito MA, Talamo P, de Vita S, Rucco I, Zanchetta G, Cesarano M (2019) Dynamics and effects



- 1140 of the Vesuvius Pomici di Avellino Plinian eruption and related phenomena on the Bronze Age  
1141 landscape of Campania region (Southern Italy). *Quaternary International* 499, 231-244.
- 1142 Di Vito M, Zanella E, Gurioli L, Lanza R, Sulpizio R, Bishop J, Tema E, Boenzi G, Laforgia E (2009)  
1143 The Afragola settlement near Vesuvius, Italy: The destruction and abandonment of a Bronze Age  
1144 village revealed by archeology, volcanology and rock-magnetism. *Earth and Planetary Science*  
1145 *Letters* 277, 408-421.
- 1146 Doronzo DM, Dellino P (2013) Hydraulics of subaqueous ash flows as deduced from their deposits:  
1147 2. Water entrainment, sedimentation, and deposition, with implications on pyroclastic density current  
1148 deposit emplacement. *Journal of Volcanology and Geothermal Research* 258, 176-186.
- 1149 Doronzo DM (2013) Aeromechanic analysis of pyroclastic density currents past a building. *Bulletin*  
1150 *of Volcanology* 75, 684.
- 1151 Duller RA, Mountney NP, Russell AJ, Cassidy NC (2008) Architectural analysis of a volcaniclastic  
1152 jökulhlaup deposit, southern Iceland: sedimentary evidence for supercritical flow. *Sedimentology* 55,  
1153 939-964.
- 1154 Faccenna C, Funiciello R, Bruni A, Mattei M, Sagnotti L (1994) Evolution of a transfer related basin:  
1155 the Ardea basin (Latium, Central Italy). *Basin Resources* 5, 1-11.
- 1156 Fedi M and Rapolla A (1987) The Campanian Volcanic Area: analysis of the magnetic and  
1157 gravimetric anomalies. *Bollettino della Società Geologica Italiana* 106, 793-805.
- 1158 Finetti I and Morelli C (1974) Esplorazione di sismica a riflessione nei Golfi di Napoli e Pozzuoli.  
1159 *Bollettino di Geofisica Teorica e Applicata* 16, 62-63.
- 1160 Fiorillo F and Wilson RC (2004) Rainfall induced debris flows in pyroclastic deposits, Campania  
1161 (southern Italy). *Engineering Geology* 75, 263-289.



- 1162 Giordano G, Zanella E, Trolese M, Baffioni C, Vona A, Caricchi C, De Benedetti AA, Corrado S,  
1163 Romano C, Sulpizio R, Geshi N (2018) Thermal interactions of the AD79 Vesuvius pyroclastic  
1164 density currents and their deposits at Villa dei Papiri (Herculaneum archaeological site, Italy). *Earth  
1165 and Planetary Science Letters* 490, 180-192.
- 1166 Girolami L, Roche O, Druitt T, Corpetti T (2010) Velocity fields and depositional processes in  
1167 laboratory ash flows, with implications for the dynamics of dense pyroclastic flows. *Bulletin of  
1168 Volcanology* 72, 747-759.
- 1169 Gurioli L, Pareschi MT, Zanella E, Lanza R, Deluca E, Bisson M (2005) Interaction of pyroclastic  
1170 density currents with human settlements: Evidence from ancient Pompeii. *Geology* 33, 441-444.
- 1171 Gurioli L, Sulpizio R, Cioni R, Sbrana A, Santacroce R, Luperini W, Andronico D (2010) Pyroclastic  
1172 flow hazard assessment at Somma-Vesuvius based on the geological record. *Bulletin of Volcanology*  
1173 72, 1021-1038.
- 1174 Guzman S, Doronzo DM, Martí J, Seggiaro R (2020). Characteristics and emplacement mechanisms  
1175 of the Coranzulí ignimbrites (Central Andes). *Sedimentary Geology* 405, 105699.
- 1176 Ippolito F, Ortolani F, Russo M (1973) Struttura marginale tirrenica dell'Appennino campano:  
1177 reinterpretazioni di dati di antiche ricerche di idrocarburi. *Memorie della Società Geologica Italiana*  
1178 12, 227–250.
- 1179 Iverson RM, Denlinger RP, LaHusen RG, Logan M, (2000) Two-phase debris-flow across 3-D  
1180 terrain: Model predictions, *in* Wieczorek GF and Naeser ND, eds., *Debris-Flow Hazard Mitigation,  
1181 Mechanics, Prediction, and Assessment: Taipei, Taiwan, 16-18 August 2000: Rotterdam, Balkema,  
1182 521-529.*
- 1183 Jenkins SF, Phillips JC, Price R, Feloy K, Baxter PJ, Sri Hadmoko D, de Bélizal E (2015) Developing  
1184 building-damage scales for lahars: application to Merapi volcano Indonesia. *Bulletin of Volcanology*  
1185 77, 1-17.



- 1186 Lesti C, Porreca M, Giordano G, Mattei M, Cas R, Wright H, Viramonte J (2011) High temperature  
1187 emplacement of the Cerro Galán and Toconquis Group ignimbrites (Puna plateau, NW Argentina)  
1188 determined by TRM analyses. *Bulletin of Volcanology* 73, 1535-1565.
- 1189 Lowe DR, Williams SN, Leigh H, Connort CB, Gemmell JB, Stoiber RE (1986) Lahars initiated by  
1190 the 13 November 1985 eruption of Nevado del Ruiz, Colombia. *Nature* 324, 51-53.
- 1191 Lowe DR (1988) Suspended-load fallout rate as an independent variable in the analysis of current  
1192 structures. *Sedimentology* 35, 765–776.
- 1193 Lube G, Cronin S, Manville V, Procter J, Cole S, Freundt A (2012) Energy growth in laharcic mass  
1194 flows. *Geology* 40, 475-478.
- 1195 Macedonio G and Pareschi MT (1992) Numerical simulation of some lahars from Mount St. Helens.  
1196 *Journal of Volcanology and Geothermal Research* 54, 65-80.
- 1197 Mariani M and Prato R (1988) I bacini neogenici costieri del margine tirrenico: approccio sismico-  
1198 stratigrafico. *Memorie della Società Geologica Italiana* 41, 519-531.
- 1199 Marotta E., Berrino G., de Vita S., Di Vito M.A., Camacho A.G., 2022. Structural setting of the Ischia  
1200 resurgent caldera (Southern Tyrrhenian Sea, Italy) by integrated 3D gravity inversion and geological  
1201 models. In: Marotta, E., D’Auria, L., Zaniboni, F. and Nave, R. (eds) *Volcanic Island: from Hazard  
1202 Assessment to Risk Mitigation*. Geological Society, London, Special Publications, 519.
- 1203 Martí J, Doronzo DM, Pedrazzi D, Colombo F (2019) Topographical controls on small-volume  
1204 pyroclastic flows. *Sedimentology* 66, 2297-2317.
- 1205 McClelland E, Druitt TH (1989) Paleomagnetic estimates of emplacement temperatures of  
1206 pyroclastic deposits on Santorini, Greece. *Bulletin of Volcanology* 51, 16-27.

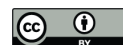

- 1207 McClelland E (1996) Theory of CRM acquired by grain growth, and its implications for TRM  
1208 discrimination and paleointensity determination in igneous rocks. *Geophysical Journal International*  
1209 126, 271-280.
- 1210 Newhall CG and Punongbayan R (Eds.) (1996) *Fire and mud: eruptions and lahars of Mount*  
1211 *Pinatubo, Philippines*. Quezon City: Philippine Institute of Volcanology and Seismology, 1126 pp.
- 1212 Orsi G, de Vita S, Di Vito MA (1996) The restless, resurgent Campi Flegrei Nested Caldera Italy.:  
1213 constraints on its evolution and configuration. *Journal of Volcanology and Geothermal Research* 74,  
1214 179-214.
- 1215 Pareschi MT, Favalli M, Giannini F, Sulpizio R, Zanchetta G, Santacroce R (2000) May 5, 1998,  
1216 Debris flows in circumvesuvian areas (Southern Italy), insights for hazard assessment. *Geology* 28,  
1217 639-642.
- 1218 Pareschi MT, Santacroce R, Sulpizio R, Zanchetta G (2002) The volcanoclastic mass flow hazard  
1219 related to the remobilization of fallout deposits in southern Campania, Italy. *Explosive volcanism in*  
1220 *subduction zones, Mount Pelée, Martinique, 12-16 May 2002, abstract volume*.
- 1221 Patacca E and Scandone P (2007) *Geology of the Southern Apennines*. *Bollettino della Società*  
1222 *Geologica Italiana Special Issue 7*, 75-119.
- 1223 Paterson, GA, Muxworthy AR, Roberts AP, MacNiocaill C (2010). Paleomagnetic determination of  
1224 emplacement temperatures of pyroclastic deposits: an under-utilized tool. *Bulletin of Volcanology*,  
1225 72, 309-330.
- 1226 Peccerillo A (2003) Plio-Quaternary magmatism in Italy. *Episodes* 26, 222-226.
- 1227 Perrotta A, Scarpati C, Luongo G, Aoyagi M (2006) Burial of Emperor Augustus' villa at Somma  
1228 Vesuviana (Italy) by post-79 AD Vesuvius eruptions and reworked (lahars and stream flow) deposits.  
1229 *Journal of Volcanology and Geothermal Research* 158, 445-466.

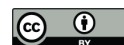

- 1230 Pierson TC (1985) Initiation and flow behavior of the 1980 Pine Creek and Muddy River lahars, Mt.  
1231 St. Helens, Washington. Geological Society of America Bulletin 96, 1056-1069.
- 1232 Piochi M, Pappalardo L, Da Astis G (2004) Geo-chemical and isotopical variations within the  
1233 Campanian Comagmatic Province: implications on magma source composition, Annals of  
1234 Geophysics 47, 1485-1499.
- 1235 Pittari A, Cas RAF, Monaghan JJ, Martí J (2007) Instantaneous dynamic pressure effects on the  
1236 behaviour of lithic boulders in pyroclastic flows: the Abrigo Ignimbrite, Tenerife, Canary Island.  
1237 Bulletin of Volcanology 69, 265-279.
- 1238 Porreca M, Mattei M, Mac Niocaill C, Giordano G, McClelland E, Funicello R (2007) Paleomagnetic  
1239 evidence for low-temperature emplacement of the phreatomagmatic Peperino Albano ignimbrite  
1240 (Colli Albani volcano, Central Italy). Bulletin of Volcanology 70, 877-893.
- 1241 Roche O, Niño Y, Mangeney A, Brand B, Pollock N, Valentine GA (2013) Dynamic pore-pressure  
1242 variations induce substrate erosion by pyroclastic flows. Geology 41, 1107-1110.
- 1243 Roche O (2015) Nature and velocity of pyroclastic density currents inferred from models of  
1244 entrainment of substrate lithic clasts. Earth and Planetary Science Letters 418, 115-125.
- 1245 Rodolfo KS (2000) The hazard from lahars and jökulhlaups. In: Encyclopedia of Volcanoes:  
1246 Academic Press, Philadelphia, 973-995.
- 1247 Rodolfo KS and Arguden AT (1991) Rain-lahar generation and sediment-delivery systems at Mayon  
1248 Volcano, Philippines: Sedimentation in Volcanic Settings, SEPM Special Publication 45, 71-87.
- 1249 Rodríguez-Sedano LA, Sarocchi D, Caballero L, Borselli L, Ortiz-Rodríguez AJ, Cerca-Ruiz MF,  
1250 Moreno-Chávez G, Franco Ramos O (2022) Post-eruptive lahars related to the 1913 eruption in La  
1251 Lumbre Ravine, Volcán de Colima, Mexico: The influence of ravine morphometry on flow dynamics.  
1252 Journal of Volcanology and Geothermal Research 421, 107423.





- 1253 Rolandi G, Barrella AM, Borrelli A (1993) The 1631 eruption of Vesuvius. *Journal of Volcanology*  
1254 and *Geothermal Research* 58, 183-201.
- 1255 Rolandi G, Munno R, Postiglione I (2004) The A.D. 472 eruption of the Somma volcano. *Journal of*  
1256 *Volcanology and Geothermal Research* 129, 291-319.
- 1257 Rosi M, Principe C, Vecci R (1993) The 1631 Vesuvius eruption. A reconstruction based on historical  
1258 and stratigraphical data. *Journal of Volcanology and Geothermal Research* 58, 151-182.
- 1259 Rosi M and Santacroce R (1983) The A.D. 472 “Pollena” eruption: volcanological and petrological  
1260 data for this poorly-known, Plinian-type event at Vesuvius. *Journal of Volcanology and Geothermal*  
1261 *Research* 17, 249-271.
- 1262 Russell AJ, Knudsen O (1999) An ice-contact rhythmite (turbidite) succession deposited during the  
1263 November 1996 catastrophic outburst flood (jökulhlaup), Skeidarárjökull, Iceland. *Sedimentary*  
1264 *Geology* 127, 1-10.
- 1265 Sandri L, de' Michieli Vitturi M, Costa A, Di Vito MA, Rucco I, Doronzo DM, Bisson M, Gianardi  
1266 R, de Vita S, Sulpizio R, (submitted) Lahar events in the last 2,000 years from Vesuvius eruptions.  
1267 Part 3: Hazard assessment over the Campanian Plain.
- 1268 Santacroce R, Cioni R, Marianelli P, Sbrana A, Sulpizio R, Zanchetta G, Donahue DJ, Joron JL  
1269 (2008) Age and whole rock-glass compositions of proximal pyroclastics from the major explosive  
1270 eruptions of Somma-Vesuvius: A review as a tool for distal tephrostratigraphy. *Journal of*  
1271 *Volcanology and Geothermal Research* 177, 1-18.
- 1272 Santacroce R., Sbrana A., Andronico D., Cioni R., Di Vito M., Marianelli P., Sulpizio R., Zanchetta  
1273 G., Arrighi S., Benvenuti E., Gurioli L., Leoni F.M., Luperini W., 2003. *Carta Geologica del Vesuvio*  
1274 *in scala 1:15.000*, Santacroce R., Sbrana A., eds. *Cartografia derivata dai rilievi geologici in scala*  
1275 *1:10.000 Regione Campania e dai rilievi in scala 1:25.000 del Progetto CARG., S.EL.C.A., Firenze.*



- 1276 Santangelo N, Romano P, Ascione A, Russo Ermolli E (2017) Quaternary evolution of the Southern  
1277 Apennines coastal plains: A review. *Geologica Carpathica* 68, 43-56.
- 1278 Scott KM (1989) Magnitude and frequency of lahars and lahar-runout flows in the Toutle-Cowlitz  
1279 River System. U. S. Geological Survey Professional Paper 1447-B, 1–33.
- 1280 Scott KM, Vallance JW, Pringle PT (1995) Sedimentology, behavior, and hazard of debris flows at  
1281 Mount Rainer, Washington. U. S. Geological Survey Professional Paper 1547, 1-56.
- 1282 Scott KM, Macias JL, Naranjo JA, Rodriguez S, McGeehin JP (2001) Catastrophic debris flows  
1283 transformed from landslide in volcanic terrains: mobility, hazard assessment and mitigation  
1284 strategies. *US Geol Surv Prof Pap.* 1630, 1-59.
- 1285 Sheridan MF, Bonnard C, Carrero C, Siebe C, Strauch W, Navarro M, Calero JC, Trujillo NB (1999)  
1286 Report of the 30 October 1998 rock fall/avalanche and breakout flow of Casita Volcano, Nicaragua,  
1287 triggered by Hurricane Mitch. *Landslide News* 12, 2-4.
- 1288 Siebe C, Schaaf P, Urrutia-Fucugauchi J (1999) Mammoth bones embedded in a late Pleistocene lahar  
1289 from Popocatepetl volcano, near Tocuila, central Mexico. *Geological Society of America Bulletin*  
1290 111, 1550-1567.
- 1291 Spence RJS, Zuccaro G, Petrazzuoli S, Baxter PJ (2004) Resistance of buildings to pyroclastic flows:  
1292 analytical and experimental studies and their application to Vesuvius. *Natural Hazards Review* 5, 48-  
1293 59.
- 1294 Sulpizio R, Mele D, Dellino P, La Volpe L (2005) A complex, Subplinian-type eruption from low-  
1295 viscosity, phonolitic to tephri-phonolitic magma: the AD 472 (Pollena) eruption of Somma-Vesuvius,  
1296 Italy. *Bulletin of Volcanology* 67, 743-767.



- 1297 Sulpizio R, Zanchetta G, Demi F, Di Vito MA, Pareschi MT, Santacroce R (2006) The Holocene  
1298 syneruptive volcanoclastic debris flows in the Vesuvian area: Geological data as a guide for hazard  
1299 assessment. *Geological Society of America Special Paper* 402, 203-221.
- 1300 Tema E, Zanella E, Pavón-Carrasco FJ, Kondopoulo D, Pavlides S (2015) Palaeomagnetic analysis  
1301 on pottery as indicator for the pyroclastic flows deposit temperature: New data and statistical  
1302 interpretation from the Minoan eruption of Santorini, Greece. *Geophysical International Journal* 203,  
1303 33-47.
- 1304 Thouret JC, Arapa E, Charbonnier S, Guerrero A, Kelfoun K, Cordoba G, Rodriguez D, Santoni O  
1305 (2022) Modeling tephra fall and sediment-water flows to assess their impact on a vulnerable building  
1306 stock in the City of Arequipa, Peru. *Frontiers in Earth Science* 10, 865989.
- 1307 Toyos G, Gunasekera R, Zanchetta G, Oppenheimer C, Sulpizio R, Favalli M, Pareschi MT (2008)  
1308 GIS-assisted modelling for debris flow hazard assessment based on the events of May 1998 in the  
1309 area of Sarno, Southern Italy: II. Velocity and dynamic pressure. *Earth Surface Processes and  
1310 Landforms* 33, 1693-1708.
- 1311 Vallance JW and Iverson R (2015) Lahars and their deposits. In: Sigurdsson, H., Houghton, B.F.,  
1312 McNutt, S.R., Rymer, H., Stix, J. (Eds.), *Encyclopedia of Volcanoes*. Academic Press, London, 649-  
1313 664.
- 1314 Vallance JW and Scott KM (1997) The Osceola mudflow from Mount Rainer: Sedimentology and  
1315 hazards implications of a huge clay-rich debris flow. *Geological Society of America Bulletin* 109,  
1316 143-163.
- 1317 Vitale S and Ciarcia S (2018) Tectono-stratigraphic setting of the Campania region (southern Italy),  
1318 *Journal of Maps* 14, 9-21.
- 1319 Voight B (1990) The 1985 Nevado del Ruiz volcano catastrophe: anatomy and retrospection. *Journal  
1320 of Volcanology and Geothermal Research* 42, 151-188.



- 1321 Waitt RB Jr, TC Pierson TC, MacLeod NS, Janda RJ, Voight B, Holcomb RT (1983) Eruption-  
1322 triggered avalanche, flood, and lahar at Mount St. Helens - Effects of winter snowpack. *Science* 221,  
1323 1394-1397.
- 1324 Whipple KX, Hancock GS, Anderson RS (2000) River incision into bedrock: Mechanics and relative  
1325 efficacy of plucking, abrasion, and cavitation. *Geological Society of America Bulletin* 112, 490-503.
- 1326 White S, García-Ruiz JM, Martí-Bono C, Valero B, Errea MP, Gómez-Villar A (1997) The 1996  
1327 Biescas campsite disaster in the Central Spanish Pyrenees and its spatial and temporal context.  
1328 *Hydrological Processes* 11, 1797-1812.
- 1329 Zanchetta G, Sulpizio R, Di Vito MA (2004b). The role of volcanic activity and climate in alluvial  
1330 fan growth at volcanic areas: an example from southern Campania (Italy). *Sedimentary Geology* 168,  
1331 249-280.
- 1332 Zanchetta G, Sulpizio R, Pareschi MT, Leoni FM, Santacroce R (2004a) Characteristics of May 5-6,  
1333 1998 volcanoclastic debris flows in the Sarno area (Campania, southern Italy): relationships to  
1334 structural damage and hazard zonation. *Journal of Volcanology and Geothermal Research* 133, 377-  
1335 393.
- 1336 Zanella E, Gurioli L, Pareschi MT, Lanza R (2007). Influences of urban fabric on pyroclastic density  
1337 currents at Pompeii (Italy): 2. Temperature of the deposits and hazard implications. *Journal of*  
1338 *Geophysical Research* 112, B05214.
- 1339 Zanella E, Gurioli L, Lanza R, Sulpizio R, Bontempi M (2008). Deposition temperature of the AD  
1340 472 Pollena pyroclastic density current deposits, Somma-Vesuvius, Italy. *Bulletin of Volcanology*  
1341 70, 1237-1248.
- 1342 Zanella E, Sulpizio R, Gurioli L, Lanza R (2015). Temperatures of the pyroclastic density currents  
1343 deposits emplaced in the last 22 kyr at Somma-Vesuvius (Italy). *Geological Society, London, Special*



1344 Publication, The Use of Palaeomagnetism and Rock Magnetism to Understand Volcanic Processes

1345 396.

1346 Zuccaro G, De Gregorio D (2013) Time and space dependency in impact damage evaluation of a sub-

1347 Plinian eruption at Mount Vesuvius. Natural Hazards 68, 1399-1423.
